# Supplementary material for: Theoretical study of fructose adsorption and conversion to trioses on metal–organic frameworks
Source: Royal Society of Chemistry journal article supplement (doi:10.1039/d3cp05876j), 2024-01-01
Supplement: d3cp05876j1.pdf [file d3cp05876j1.pdf]

## Electronic Supplementary Information

### Theoretical study of fructose adsorption and conversion to trioses on metal–organic frameworks

Jarinya Sittiwong,<sup>a</sup> Thana Maihom,<sup>a\*</sup> Chomphunuch Wansa,<sup>a</sup> Michael Probst,<sup>b,c</sup> and  
Jumras Limtrakul<sup>b</sup>

<sup>a</sup>*Division of Chemistry, Department of Physical and Material Sciences, Faculty of Liberal Arts and Science, Kasetsart University, Kamphaeng Saen Campus, Nakhon Pathom 73140, Thailand.*

<sup>b</sup>*Department of Materials Science and Engineering, Vidyasirimedhi Institute of Science and Technology, Rayong 21210, Thailand*

<sup>c</sup>*Institute of Ion Physics and Applied Physics, University of Innsbruck, 6020 Innsbruck, Austria*

**Table S1** Adsorption energy of fructose and the overall barrier of the reaction without thermal correction on NU-1000 with 4- and 8-connected linkers, and UIO-66 with 4- and 11-connected linkers.

| MOFs                           | Zr-NU-1000  |             | Hf-UIO-66   |              |
|--------------------------------|-------------|-------------|-------------|--------------|
|                                | 4-connected | 8-connected | 4-connected | 11-connected |
| Fructose adsorption (kcal/mol) | -58.1       | -57.9       | -60.4       | -59.5        |
| Overall barrier (kcal/mol)     | 37.1        | 37.2        | 36.3        | 36.4         |

**Table S1.** Optimized key distances of the species involved in the ring-opening of fructose over Zr-NU-1000.

| Distance (Å) | Isolated cluster | Ads  | TS1  | Int1 | TS2  | Int2 |
|--------------|------------------|------|------|------|------|------|
| Zr-O2        | -                | 2.33 | 2.29 | 2.14 | 2.15 | 2.26 |
| Zr-O         | 2.03             | 2.13 | 2.17 | 2.25 | 2.14 | 2.17 |
| O2-H1        | 0.97             | 1.03 | 1.14 | 1.69 | 2.56 | 2.89 |
| O-H1         | -                | 1.53 | 1.28 | 1.00 | 1.50 | 1.72 |
| C1-O2        | 1.39             | 1.42 | 1.40 | 1.36 | 1.26 | 1.23 |
| C1-O1        | 1.44             | 1.41 | 1.42 | 1.44 | 1.81 | 2.33 |
| O1-H1        | 2.66             | 2.37 | 2.41 | 2.45 | 1.04 | 0.99 |

**Table S2.** Optimized key distances of the species involved in the retro-aldol fragmentation pathway over Zr-NU-1000.

| Distance (Å) | Int2 | Int2_Ro_1 | TS3_1 | Int3_1 | TS4_1 | Prod_1 |
|--------------|------|-----------|-------|--------|-------|--------|
| Zr-O2        | 2.26 | 2.32      | 2.10  | 2.07   | 2.22  | 2.29   |
| Zr-O         | 2.17 | 2.08      | 2.26  | 2.36   | 2.16  | 2.08   |
| C1-O2        | 1.23 | 1.22      | 1.29  | 1.33   | 1.26  | 1.22   |
| C2-C3        | 1.53 | 1.55      | 2.46  | 3.00   | 3.26  | 3.13   |
| O4-H2        | 0.97 | 0.96      | 1.22  | 1.71   | 3.20  | 2.76   |
| O-H2         | -    | 3.64      | 1.20  | 1.00   | 1.36  | 5.18   |
| C2-H2        | 2.70 | 3.20      | 3.59  | 3.59   | 1.31  | 1.10   |

**Table S3.** Optimized key distances of the species involved in an intramolecular hydrogen shift pathway over Zr-NU-1000.

| Distance (Å) | Int2 | Int2_Ro_2 | TS3_2 | Prod_2 |
|--------------|------|-----------|-------|--------|
| Zr-O4        | 5.57 | 2.45      | 2.32  | 2.33   |
| Zr-O         | 2.17 | 2.01      | 2.12  | 2.10   |
| C2-C3        | 1.55 | 1.53      | 2.00  | 3.67   |
| O4-H3        | 0.96 | 0.98      | 1.33  | 3.87   |
| C2-H3        | 3.20 | 2.34      | 1.42  | 1.10   |
| C3-O4        | 1.42 | 1.44      | 1.36  | 1.22   |

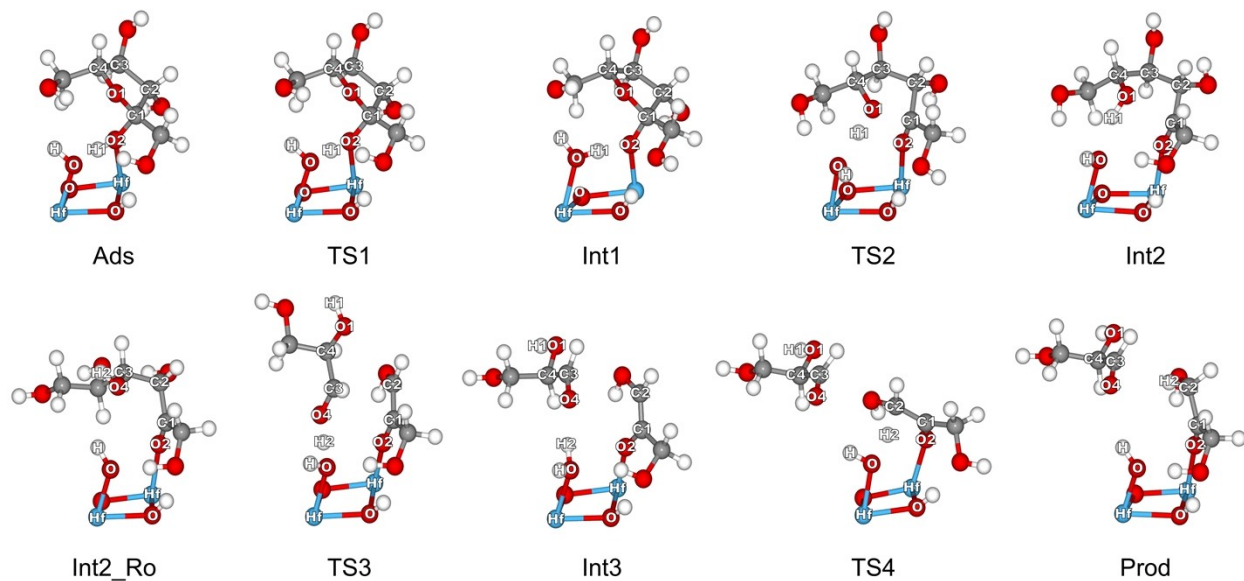

**Figure S1.** Optimized structures of the fructose conversion into GLA and DHA over Hf-NU-1000.

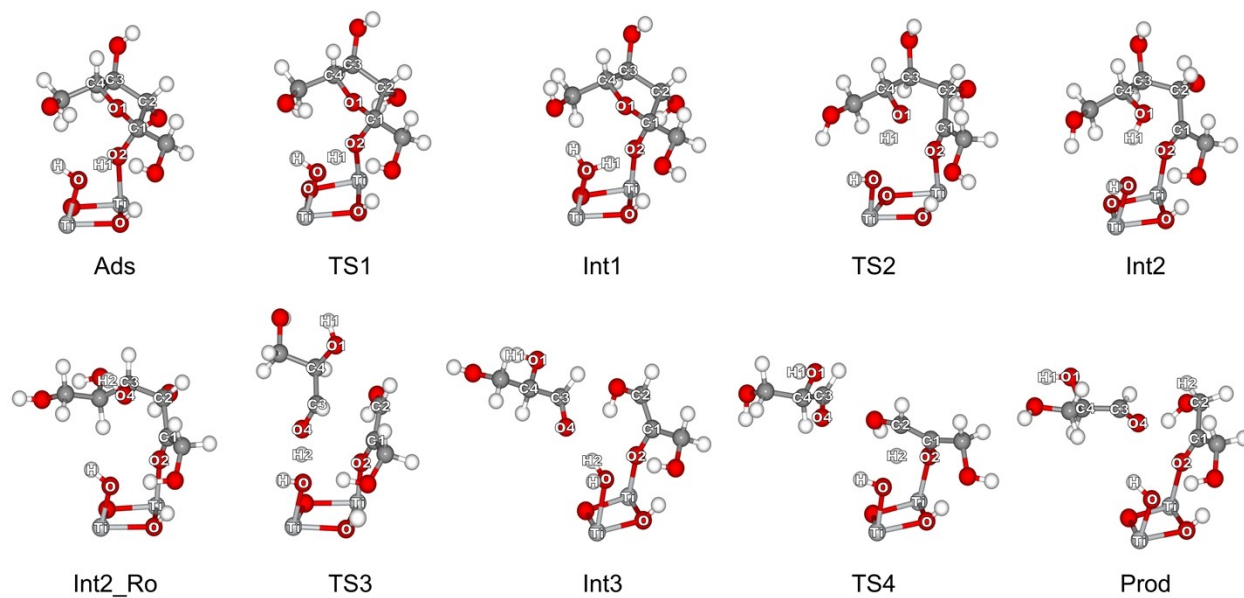

**Figure S2.** Optimized structures of the fructose conversion into GLA and DHA over Ti-NU-1000.

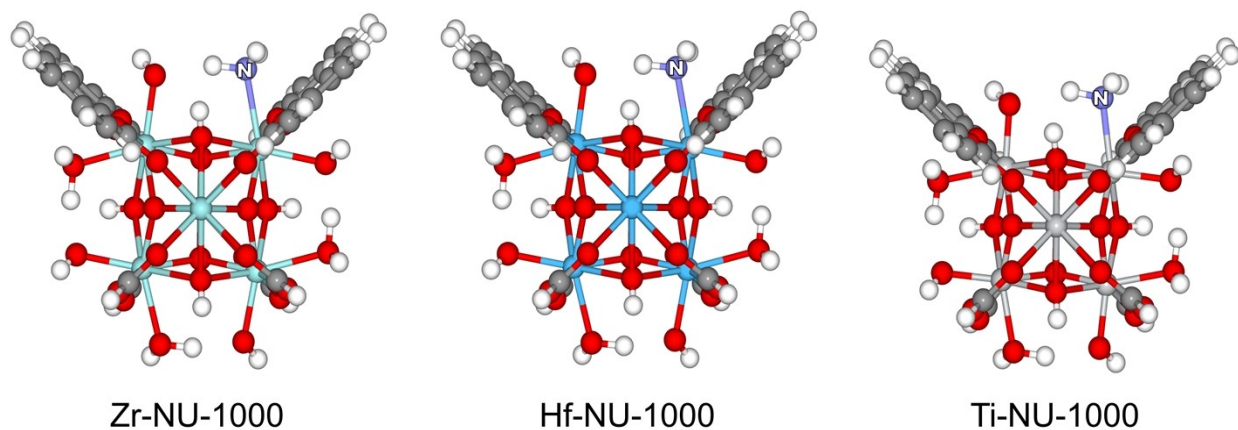

**Figure S3.** Optimized structures of the ammonia adsorption on NU-1000 MOFs and their binding free energies.

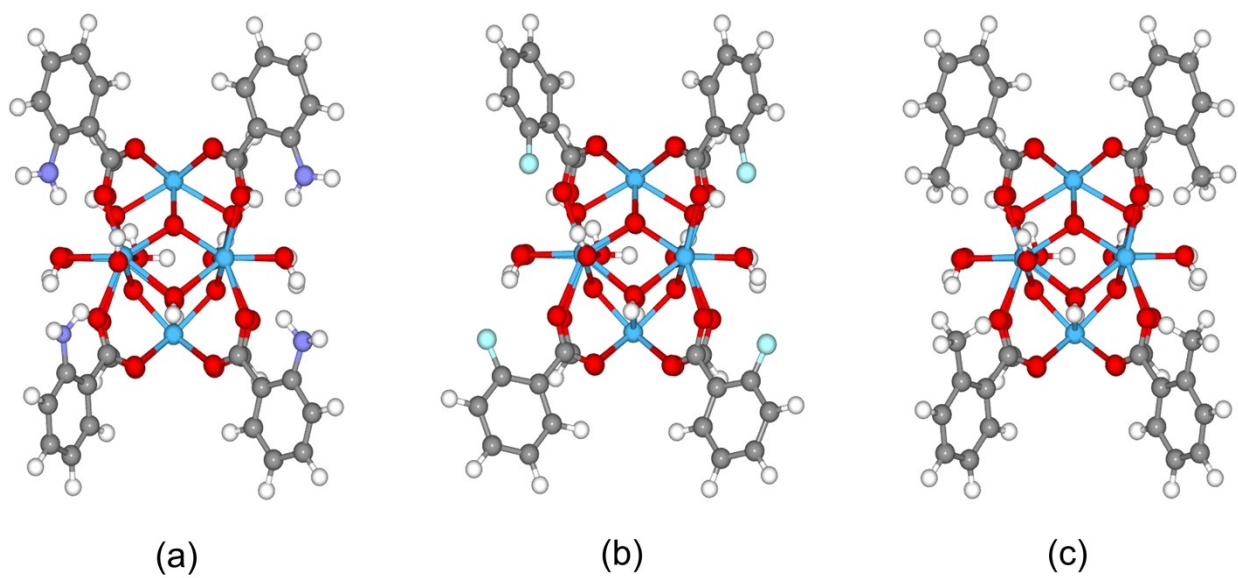

**Figure S4.** Cluster models of the functionalized Hf-NU-1000; (a) -NH<sub>2</sub>, (b) -F, and (c) -CH<sub>3</sub>. Hf, O, C, H, N and F are represented in blue, red, grey, white, dark blue, and green, respectively.

### Turnover frequencies (TOF).

The turnover frequencies (TOF) for the catalytic pathways are calculated by using the energy span model of Kozuch and Shaik<sup>42</sup> through equation (1):

$$TOF = \frac{k_B T}{h} \frac{e^{-\Delta G_r/RT} - 1}{\sum_{i=1, j=0}^N e^{(T_i - I_j - \delta G_{ij}/RT)}} \quad (1)$$

$k_B$  is Boltzmann's constant,  $h$  is Planck's constant,  $T$  is the absolute temperature,  $R$  is the universal gas constant,  $N$  is the number of steps in the catalytic cycle,  $\Delta G_r$  is the reaction's Gibbs free energy,  $T_i$  represents the energies of transition states,  $I_j$  denotes the energies of intermediates, and  $\delta G_{ij}$  is defined as  $\Delta G_r$  if  $i > j$  and 0 if  $i \leq j$ . In this study, the reaction is exergonic ( $\Delta G_r < 0$ ), and Equation 1 can be simplified to:

$$TOF \approx \frac{k_B T}{h} e^{-\delta G/RT} \quad (2)$$

with  $\delta G$  being defined to be  $T_{TDTS} - I_{TDI}$ , as the TDI precedes the TDTS for all catalytic cycles in this work. In Equation 2, the TOF is contributed by two states forming the energy span so-called the TOF-determining intermediate (TDI) and TOF-determining transition state (TDTS). In our work, the TDI is Int1, whereas the TDTS is TS4.

**Coordinates of all optimized structures.**

## 1. Zr-NU-1000 case

## Zr-NU-1000

|   |              |              |              |
|---|--------------|--------------|--------------|
| C | -3.248200000 | -2.182800000 | -1.650100000 |
| C | -3.229700000 | -2.386600000 | 2.900000000  |
| C | -3.232300000 | 2.034300000  | 3.104000000  |
| C | 3.276900000  | 2.142000000  | 2.939200000  |
| C | 3.226900000  | 2.366300000  | -1.338700000 |
| C | 3.259300000  | -2.277900000 | -1.561500000 |
| C | -3.265300000 | 2.236100000  | -1.457300000 |
| C | 3.257200000  | -2.506600000 | 2.716400000  |
| H | 4.086956000  | 2.683362000  | 3.474348000  |
| H | 4.063785000  | -3.157376000 | 3.120923000  |
| H | -4.031448000 | 2.543433000  | 3.686468000  |
| H | -4.029729000 | -2.994711000 | 3.375702000  |
| C | 5.678221000  | -2.765225000 | -1.968617000 |
| C | -5.649623000 | -2.654502000 | -2.168031000 |
| C | 4.334716000  | -3.004251000 | -2.287446000 |
| C | -4.294245000 | -2.873606000 | -2.447464000 |
| C | 4.015928000  | -3.929002000 | -3.290650000 |
| C | -3.932161000 | -3.748086000 | -3.480157000 |
| C | 5.027546000  | -4.604846000 | -3.966247000 |
| C | -4.914367000 | -4.393807000 | -4.225056000 |
| C | 6.363864000  | -4.363671000 | -3.643253000 |
| C | -6.263287000 | -4.170067000 | -3.944400000 |
| C | 6.687689000  | -3.444053000 | -2.644448000 |
| C | -6.629590000 | -3.300494000 | -2.915801000 |
| C | 5.642417000  | 3.002280000  | -1.555784000 |
| C | -5.694195000 | 2.738366000  | -1.818856000 |
| C | 4.305595000  | 3.214983000  | -1.916359000 |
| C | -4.352012000 | 3.027893000  | -2.096938000 |
| C | 3.987027000  | 4.232951000  | -2.824620000 |
| C | -4.037169000 | 4.070745000  | -2.977899000 |
| C | 4.993353000  | 5.029369000  | -3.363372000 |
| C | -5.052460000 | 4.813154000  | -3.573678000 |
| C | 6.322985000  | 4.817967000  | -2.994966000 |
| C | -6.388096000 | 4.518312000  | -3.295445000 |
| C | 6.646069000  | 3.804827000  | -2.090923000 |
| C | -6.707524000 | 3.480992000  | -2.417917000 |

|   |              |              |              |
|---|--------------|--------------|--------------|
| H | 5.91000000   | -2.041419000 | -1.185130000 |
| H | -5.913874000 | -1.971177000 | -1.358783000 |
| H | 2.965771000  | -4.102970000 | -3.532551000 |
| H | -2.871781000 | -3.910644000 | -3.681015000 |
| H | 4.775296000  | -5.322943000 | -4.749665000 |
| H | -4.629197000 | -5.075792000 | -5.029303000 |
| H | 7.733789000  | -3.255763000 | -2.393033000 |
| H | -7.685593000 | -3.126421000 | -2.697288000 |
| H | 5.874001000  | 2.203213000  | -0.848922000 |
| H | -5.922504000 | 1.924687000  | -1.128001000 |
| H | 2.942199000  | 4.376227000  | -3.107933000 |
| H | -2.986603000 | 4.288503000  | -3.179680000 |
| H | 4.742265000  | 5.817767000  | -4.076547000 |
| H | -4.803286000 | 5.626903000  | -4.258490000 |
| H | 7.687086000  | 3.640229000  | -1.803699000 |
| H | -7.753105000 | 3.251630000  | -2.200222000 |
| H | -7.033735000 | -4.676908000 | -4.530556000 |
| H | 7.157537000  | -4.894971000 | -4.173957000 |
| H | -7.184619000 | 5.101103000  | -3.764486000 |
| H | 7.112208000  | 5.445066000  | -3.416753000 |
| H | -1.925409000 | -2.954614000 | 0.622181000  |
| H | -0.871017000 | 1.410804000  | 5.075646000  |
| H | -0.010757000 | 0.106277000  | 4.800275000  |
| H | 0.021232000  | 4.010961000  | 0.564979000  |
| H | 0.652989000  | 4.302714000  | 2.640349000  |
| H | 0.868467000  | 4.306687000  | -0.740435000 |
| H | 1.962876000  | -0.169559000 | 3.582645000  |
| H | -1.937445000 | 2.793681000  | 0.826078000  |
| H | -0.605581000 | -1.982688000 | 5.137817000  |
| H | 0.894888000  | -4.438700000 | 2.213880000  |
| H | 0.691959000  | -4.440747000 | -1.138847000 |
| H | 0.036124000  | -4.156529000 | 0.910138000  |
| O | -1.063919000 | -0.101326000 | 2.190762000  |
| O | -3.619477000 | 1.286652000  | 2.167780000  |
| O | -3.610371000 | 1.334904000  | -0.630233000 |
| O | -3.608551000 | -1.508232000 | 2.086284000  |
| O | -2.049388000 | -2.646119000 | 3.248123000  |
| O | 0.044268000  | -4.080035000 | 1.924787000  |
| O | 2.076556000  | -2.825573000 | 3.005400000  |
| O | 2.047127000  | -2.549146000 | -1.862241000 |
| O | 3.630235000  | -1.526407000 | 2.023340000  |
| O | 3.601356000  | -1.433256000 | -0.689278000 |
| O | 3.649088000  | 1.283984000  | 2.096557000  |
| O | 3.585104000  | 1.355086000  | -0.652664000 |
| O | 2.030867000  | 2.689980000  | -1.555499000 |
| O | 2.098445000  | 2.450776000  | 3.238011000  |

|    |              |              |              |
|----|--------------|--------------|--------------|
| O  | 1.071278000  | 1.381143000  | 0.725378000  |
| O  | 1.410840000  | -0.120622000 | 2.792358000  |
| O  | 0.036194000  | -1.507218000 | 4.598789000  |
| O  | -0.022937000 | 1.118272000  | 4.713751000  |
| O  | 1.071491000  | -1.551540000 | 0.711826000  |
| O  | -1.386655000 | -2.157503000 | 0.702945000  |
| O  | -2.026573000 | -2.362188000 | -1.968573000 |
| O  | 0.006853000  | -3.935474000 | -0.687607000 |
| O  | -3.622137000 | -1.444752000 | -0.688212000 |
| O  | -0.005233000 | 3.781635000  | 2.167725000  |
| O  | 0.018324000  | 3.949761000  | -0.448571000 |
| O  | -1.393729000 | 1.998128000  | 0.770033000  |
| O  | -2.046890000 | 2.256393000  | 3.451979000  |
| O  | -2.074446000 | 2.502800000  | -1.771691000 |
| O  | 1.331427000  | -0.052916000 | -1.415530000 |
| O  | -1.079007000 | -0.057158000 | -0.749515000 |
| Hf | 2.535838000  | -0.053703000 | 0.697589000  |
| Hf | -0.021675000 | -1.860507000 | 2.537706000  |
| Hf | 0.036224000  | 1.712038000  | 2.490636000  |
| Hf | -0.047621000 | 1.740609000  | -1.114049000 |
| Hf | -2.539398000 | -0.065881000 | 0.715114000  |
| Hf | 0.020779000  | -1.855474000 | -0.994698000 |
| H  | 1.862959000  | 0.025816000  | -2.217973000 |
| O  | 0.063981000  | 1.618933000  | -3.135157000 |
| H  | -0.697872000 | 1.841724000  | -3.677665000 |

## Zr-NU-1000 adsorption O2 mode

|   |              |              |              |
|---|--------------|--------------|--------------|
| C | -3.248217000 | -2.182786000 | -1.650097000 |
| C | -3.229703000 | -2.386601000 | 2.899998000  |
| C | -3.232304000 | 2.034304000  | 3.104001000  |
| C | 3.276892000  | 2.141996000  | 2.939207000  |
| C | 3.226874000  | 2.366332000  | -1.338705000 |
| C | 3.259377000  | -2.277981000 | -1.561482000 |
| C | -3.265317000 | 2.236121000  | -1.457290000 |
| C | 3.257197000  | -2.506585000 | 2.716367000  |
| H | 4.089823000  | 2.704071000  | 3.450200000  |
| H | 4.063883000  | -3.140757000 | 3.147131000  |
| H | -4.030453000 | 2.565567000  | 3.668987000  |
| H | -4.031490000 | -2.988154000 | 3.383001000  |
| C | 5.677622000  | -2.581911000 | -2.126090000 |
| C | -5.560712000 | -2.078875000 | -2.591632000 |
| C | 4.350679000  | -3.007017000 | -2.271970000 |
| C | -4.320946000 | -2.728847000 | -2.527648000 |
| C | 4.070058000  | -4.108749000 | -3.091190000 |
| C | -4.086720000 | -3.853042000 | -3.329646000 |
| C | 5.097143000  | -4.771442000 | -3.757194000 |



|   |              |              |              |
|---|--------------|--------------|--------------|
| C | -5.073738000 | -4.312298000 | -4.197111000 |
| C | 6.414704000  | -4.333823000 | -3.616120000 |
| C | -6.299411000 | -3.649365000 | -4.271129000 |
| C | 6.702702000  | -3.239041000 | -2.800181000 |
| C | -6.542528000 | -2.534392000 | -3.466544000 |
| C | 5.637004000  | 2.970531000  | -1.664399000 |
| C | -5.689826000 | 2.688222000  | -1.888473000 |
| C | 4.291044000  | 3.182076000  | -1.989342000 |
| C | -4.346542000 | 2.968392000  | -2.171996000 |
| C | 3.953312000  | 4.161716000  | -2.931887000 |
| C | -4.030412000 | 3.935714000  | -3.134324000 |
| C | 4.949024000  | 4.920537000  | -3.540386000 |
| C | -5.044387000 | 4.611970000  | -3.805649000 |
| C | 6.288080000  | 4.709652000  | -3.208031000 |
| C | -6.380605000 | 4.328033000  | -3.520022000 |
| C | 6.630468000  | 3.734877000  | -2.269500000 |
| C | -6.702112000 | 3.366682000  | -2.560495000 |
| H | 5.883592000  | -1.726491000 | -1.480380000 |
| H | -5.727367000 | -1.204670000 | -1.958554000 |
| H | 3.040898000  | -4.464031000 | -3.184972000 |
| H | -3.122969000 | -4.363572000 | -3.267909000 |
| H | 4.870979000  | -5.636132000 | -4.384949000 |
| H | -4.879569000 | -5.184725000 | -4.824490000 |
| H | 7.734004000  | -2.897326000 | -2.688253000 |
| H | -7.502351000 | -2.016288000 | -3.525618000 |
| H | 5.883262000  | 2.201497000  | -0.929747000 |
| H | -5.919734000 | 1.934395000  | -1.132993000 |
| H | 2.901187000  | 4.308527000  | -3.184748000 |
| H | -2.980308000 | 4.147160000  | -3.343681000 |
| H | 4.682081000  | 5.679659000  | -4.279143000 |
| H | -4.793695000 | 5.363955000  | -4.557061000 |
| H | 7.678813000  | 3.570623000  | -2.010031000 |
| H | -7.748311000 | 3.146626000  | -2.336161000 |
| H | -7.070650000 | -4.003949000 | -4.959267000 |
| H | 7.220720000  | -4.851480000 | -4.141474000 |
| H | -7.176106000 | 4.859288000  | -4.048221000 |
| H | 7.069176000  | 5.307287000  | -3.684249000 |
| H | -1.933875000 | -2.915234000 | 0.605547000  |
| H | -0.885087000 | 1.318093000  | 5.124498000  |
| H | -0.010913000 | 0.028379000  | 4.809497000  |
| H | 0.033592000  | 4.027903000  | 0.646319000  |
| H | 0.683867000  | 4.267697000  | 2.698370000  |
| H | 0.922784000  | 4.305899000  | -0.635808000 |
| H | 1.974245000  | -0.215291000 | 3.564936000  |
| H | -1.943682000 | 2.795149000  | 0.830054000  |
| H | -0.633094000 | -2.031787000 | 5.069146000  |

|    |              |              |              |
|----|--------------|--------------|--------------|
| H  | 0.897060000  | -4.460540000 | 2.160691000  |
| H  | -0.401726000 | -4.527514000 | -1.306217000 |
| H  | 0.023574000  | -4.186935000 | 0.863625000  |
| O  | -1.055421000 | -0.098935000 | 2.190131000  |
| O  | -3.619670000 | 1.293262000  | 2.166642000  |
| O  | -3.613156000 | 1.362810000  | -0.609403000 |
| O  | -3.614305000 | -1.504671000 | 2.091834000  |
| O  | -2.050988000 | -2.658816000 | 3.235743000  |
| O  | 0.038330000  | -4.111366000 | 1.884687000  |
| O  | 2.076417000  | -2.844877000 | 2.977591000  |
| O  | 2.065705000  | -2.530279000 | -1.902927000 |
| O  | 3.633041000  | -1.527609000 | 2.024944000  |
| O  | 3.602025000  | -1.438004000 | -0.689257000 |
| O  | 3.642003000  | 1.280713000  | 2.104081000  |
| O  | 3.596353000  | 1.402273000  | -0.607982000 |
| O  | 2.021301000  | 2.686801000  | -1.559461000 |
| O  | 2.101277000  | 2.441467000  | 3.269779000  |
| O  | 1.064387000  | 1.412737000  | 0.777108000  |
| O  | 1.409097000  | -0.141578000 | 2.785848000  |
| O  | 0.038328000  | -1.551832000 | 4.570140000  |
| O  | -0.030124000 | 1.047732000  | 4.762014000  |
| O  | 1.057634000  | -1.569617000 | 0.660830000  |
| O  | -1.402515000 | -2.114904000 | 0.688622000  |
| O  | -2.055440000 | -2.519753000 | -1.898166000 |
| O  | 0.023335000  | -3.942315000 | -0.669832000 |
| O  | -3.603054000 | -1.388967000 | -0.729255000 |
| O  | -0.009609000 | 3.784129000  | 2.233938000  |
| O  | 0.052996000  | 3.976370000  | -0.369951000 |
| O  | -1.387474000 | 2.006917000  | 0.799484000  |
| O  | -2.050714000 | 2.232463000  | 3.481651000  |
| O  | -2.064252000 | 2.518465000  | -1.747559000 |
| O  | 1.382695000  | 0.015379000  | -1.317453000 |
| O  | -1.083320000 | -0.040579000 | -0.783600000 |
| H  | 1.910121000  | 0.043229000  | -2.141270000 |
| O  | -0.019262000 | 1.550693000  | -3.157033000 |
| H  | -0.833175000 | 1.936529000  | -3.509487000 |
| Zr | 2.512614000  | -0.071597000 | 0.695373000  |
| Zr | -0.014953000 | -1.889511000 | 2.490082000  |
| Zr | 0.032491000  | 1.705656000  | 2.557246000  |
| Zr | -0.025685000 | 1.753499000  | -1.015868000 |
| Zr | -2.526640000 | -0.068981000 | 0.721139000  |
| Zr | -0.001172000 | -1.874898000 | -1.113373000 |
| C  | -1.379309000 | -2.784908000 | -5.093353000 |
| C  | 0.094809000  | -2.857804000 | -4.684621000 |
| C  | 0.452903000  | -1.381778000 | -4.527115000 |
| C  | -1.534651000 | -1.389347000 | -5.711911000 |

|   |              |              |              |
|---|--------------|--------------|--------------|
| C | 1.926714000  | -0.991120000 | -4.654830000 |
| C | -2.597861000 | -0.517954000 | -5.064569000 |
| H | 2.554938000  | -1.803130000 | -4.259635000 |
| H | 0.698912000  | -3.287427000 | -5.511650000 |
| H | -1.954889000 | -2.831536000 | -4.159043000 |
| H | -1.547755000 | 0.998435000  | -5.551966000 |
| H | 2.153409000  | -0.898961000 | -5.731530000 |
| H | 1.584619000  | 0.859011000  | -4.051600000 |
| H | -2.505993000 | -0.596579000 | -3.961252000 |
| H | -3.599386000 | -0.896836000 | -5.325807000 |
| H | 1.156888000  | -3.548689000 | -3.187247000 |
| H | -0.124174000 | 0.017681000  | -3.237028000 |
| H | -1.360935000 | -3.837038000 | -6.718747000 |
| H | -1.716442000 | -1.451500000 | -6.798798000 |
| O | -1.841782000 | -3.845793000 | -5.882476000 |
| O | 2.270411000  | 0.168233000  | -3.942538000 |
| O | -2.495641000 | 0.810889000  | -5.502535000 |
| O | -0.083804000 | -1.004170000 | -3.275346000 |
| O | 0.234618000  | -3.595168000 | -3.500682000 |
| O | -0.254024000 | -0.740125000 | -5.557294000 |

## Zr-NU-1000 adsorption O3 mode

|   |              |              |              |
|---|--------------|--------------|--------------|
| C | -3.248200000 | -2.182800000 | -1.650100000 |
| C | -3.229700000 | -2.386600000 | 2.900000000  |
| C | -3.232300000 | 2.034300000  | 3.104000000  |
| C | 3.276900000  | 2.142000000  | 2.939200000  |
| C | 3.226900000  | 2.366300000  | -1.338700000 |
| C | 3.259300000  | -2.277900000 | -1.561500000 |
| C | -3.265300000 | 2.236100000  | -1.457300000 |
| C | 3.257200000  | -2.506600000 | 2.716400000  |
| H | 4.087259000  | 2.689888000  | 3.469103000  |
| H | 4.061728000  | -3.151149000 | 3.136149000  |
| H | -4.030391000 | 2.553642000  | 3.680041000  |
| H | -4.031760000 | -2.992335000 | 3.377220000  |
| C | 5.671846000  | -2.582553000 | -2.177708000 |
| C | -5.591307000 | -2.155701000 | -2.542524000 |
| C | 4.328764000  | -2.932864000 | -2.366706000 |
| C | -4.292773000 | -2.678093000 | -2.593511000 |
| C | 3.995972000  | -3.888066000 | -3.335575000 |
| C | -3.969975000 | -3.632102000 | -3.568531000 |
| C | 4.987943000  | -4.480136000 | -4.110708000 |
| C | -4.931175000 | -4.053262000 | -4.483357000 |
| C | 6.324383000  | -4.124778000 | -3.919764000 |
| C | -6.220956000 | -3.521004000 | -4.433514000 |
| C | 6.664176000  | -3.177987000 | -2.951755000 |
| C | -6.549530000 | -2.573998000 | -3.462423000 |

|   |              |              |              |
|---|--------------|--------------|--------------|
| C | 5.627411000  | 3.053842000  | -1.544743000 |
| C | -5.688918000 | 2.757441000  | -1.820092000 |
| C | 4.289751000  | 3.234335000  | -1.919934000 |
| C | -4.345947000 | 3.007735000  | -2.131535000 |
| C | 3.958947000  | 4.236731000  | -2.841040000 |
| C | -4.027002000 | 3.985298000  | -3.082873000 |
| C | 4.953520000  | 5.048571000  | -3.378719000 |
| C | -5.038740000 | 4.701608000  | -3.715469000 |
| C | 6.283777000  | 4.868327000  | -2.996513000 |
| C | -6.374872000 | 4.447825000  | -3.401761000 |
| C | 6.619189000  | 3.871237000  | -2.079192000 |
| C | -6.698607000 | 3.476249000  | -2.453270000 |
| H | 5.918063000  | -1.836422000 | -1.419883000 |
| H | -5.826806000 | -1.414276000 | -1.776364000 |
| H | 2.950457000  | -4.162142000 | -3.477212000 |
| H | -2.959350000 | -4.046695000 | -3.583145000 |
| H | 4.712632000  | -5.220911000 | -4.865258000 |
| H | -4.677193000 | -4.801974000 | -5.237249000 |
| H | 7.710262000  | -2.901194000 | -2.802471000 |
| H | -7.559175000 | -2.159051000 | -3.423894000 |
| H | 5.868439000  | 2.267277000  | -0.827066000 |
| H | -5.920489000 | 1.994951000  | -1.073915000 |
| H | 2.914382000  | 4.358250000  | -3.134887000 |
| H | -2.976457000 | 4.171742000  | -3.313127000 |
| H | 4.692668000  | 5.824902000  | -4.101526000 |
| H | -4.786324000 | 5.462596000  | -4.457276000 |
| H | 7.660605000  | 3.731108000  | -1.780803000 |
| H | -7.744588000 | 3.280237000  | -2.206677000 |
| H | -6.974266000 | -3.848461000 | -5.153949000 |
| H | 7.105571000  | -4.588021000 | -4.527428000 |
| H | -7.168429000 | 5.011304000  | -3.898569000 |
| H | 7.063678000  | 5.507487000  | -3.417493000 |
| H | -1.933558000 | -2.948863000 | 0.626478000  |
| H | -0.883321000 | 1.361435000  | 5.101331000  |
| H | -0.013506000 | 0.066308000  | 4.807905000  |
| H | 0.033514000  | 4.013442000  | 0.596313000  |
| H | 0.684174000  | 4.275361000  | 2.653460000  |
| H | 0.914522000  | 4.287197000  | -0.691269000 |
| H | 1.963372000  | -0.181835000 | 3.588179000  |
| H | -1.936758000 | 2.796651000  | 0.827070000  |
| H | -0.634205000 | -2.005256000 | 5.090152000  |
| H | 0.894140000  | -4.463818000 | 2.176143000  |
| H | 0.811049000  | -4.394524000 | -1.081310000 |
| H | 0.029558000  | -4.168157000 | 0.879706000  |
| O | -1.063447000 | -0.100929000 | 2.196478000  |
| O | -3.622244000 | 1.291520000  | 2.167773000  |

|    |              |              |              |
|----|--------------|--------------|--------------|
| O  | -3.614200000 | 1.348716000  | -0.622549000 |
| O  | -3.613217000 | -1.509035000 | 2.087724000  |
| O  | -2.052433000 | -2.650334000 | 3.247423000  |
| O  | 0.040152000  | -4.106997000 | 1.895328000  |
| O  | 2.076300000  | -2.837820000 | 2.986032000  |
| O  | 2.060204000  | -2.610368000 | -1.799343000 |
| O  | 3.638407000  | -1.526828000 | 2.029897000  |
| O  | 3.615867000  | -1.422048000 | -0.702215000 |
| O  | 3.648497000  | 1.283429000  | 2.102698000  |
| O  | 3.597360000  | 1.388060000  | -0.626637000 |
| O  | 2.020655000  | 2.660546000  | -1.589121000 |
| O  | 2.099788000  | 2.454080000  | 3.247306000  |
| O  | 1.066110000  | 1.391656000  | 0.744686000  |
| O  | 1.412623000  | -0.124961000 | 2.797501000  |
| O  | 0.037889000  | -1.530850000 | 4.586677000  |
| O  | -0.028593000 | 1.082044000  | 4.745039000  |
| O  | 1.069624000  | -1.543229000 | 0.698794000  |
| O  | -1.383690000 | -2.159301000 | 0.699269000  |
| O  | -2.049138000 | -2.498627000 | -1.891659000 |
| O  | 0.027211000  | -3.962390000 | -0.721181000 |
| O  | -3.623464000 | -1.434143000 | -0.699904000 |
| O  | -0.004509000 | 3.784735000  | 2.189427000  |
| O  | 0.047394000  | 3.955924000  | -0.419085000 |
| O  | -1.389968000 | 2.002518000  | 0.782356000  |
| O  | -2.048805000 | 2.246134000  | 3.465550000  |
| O  | -2.066969000 | 2.501972000  | -1.766269000 |
| O  | 1.381150000  | -0.030998000 | -1.355398000 |
| O  | -1.077434000 | -0.057910000 | -0.738989000 |
| H  | 1.921370000  | 0.006310000  | -2.155249000 |
| O  | -0.039597000 | 1.351623000  | -3.139290000 |
| H  | -0.840293000 | 1.656565000  | -3.587792000 |
| Zr | 2.532427000  | -0.073312000 | 0.699929000  |
| Zr | -0.013261000 | -1.877193000 | 2.511824000  |
| Zr | 0.036334000  | 1.708846000  | 2.524298000  |
| Zr | -0.037997000 | 1.730655000  | -1.061494000 |
| Zr | -2.532836000 | -0.075287000 | 0.726420000  |
| Zr | 0.015959000  | -1.874909000 | -1.067377000 |
| C  | -1.044517000 | -0.717353000 | -5.452890000 |
| C  | -0.636462000 | -1.734421000 | -4.401589000 |
| C  | 0.264344000  | -2.667388000 | -5.197652000 |
| C  | -1.206402000 | -1.603083000 | -6.689740000 |
| C  | 0.431398000  | -4.055316000 | -4.614197000 |
| C  | -0.732550000 | -0.987498000 | -7.984816000 |
| H  | 0.817796000  | -3.962709000 | -3.587330000 |
| H  | -1.535404000 | -2.308220000 | -4.106912000 |
| H  | -0.211684000 | -0.008312000 | -5.600270000 |

|   |              |              |              |
|---|--------------|--------------|--------------|
| H | -0.390162000 | -2.681989000 | -8.781369000 |
| H | -0.547395000 | -4.562709000 | -4.562923000 |
| H | 1.006368000  | -4.950541000 | -6.222350000 |
| H | 0.310130000  | -0.636812000 | -7.841689000 |
| H | -1.344062000 | -0.100948000 | -8.213615000 |
| H | -0.022283000 | -0.154666000 | -3.288854000 |
| H | 2.132554000  | -2.770966000 | -5.576286000 |
| H | -2.904753000 | -0.506053000 | -4.929900000 |
| H | -2.267968000 | -1.902158000 | -6.796048000 |
| O | -2.157026000 | 0.073930000  | -5.128565000 |
| O | 1.385060000  | -4.790155000 | -5.348630000 |
| O | -0.850924000 | -1.879327000 | -9.056452000 |
| O | 1.500219000  | -2.061126000 | -5.383149000 |
| O | -0.034645000 | -1.193785000 | -3.260720000 |
| O | -0.446224000 | -2.799192000 | -6.433959000 |

## Zr-NU-1000 adsorption O4 mode

|   |              |              |              |
|---|--------------|--------------|--------------|
| C | -3.248200000 | -2.182800000 | -1.650100000 |
| C | -3.229700000 | -2.386600000 | 2.900000000  |
| C | -3.232300000 | 2.034300000  | 3.104000000  |
| C | 3.276900000  | 2.142000000  | 2.939200000  |
| C | 3.226900000  | 2.366300000  | -1.338700000 |
| C | 3.259300000  | -2.277900000 | -1.561500000 |
| C | -3.265300000 | 2.236100000  | -1.457300000 |
| C | 3.257200000  | -2.506600000 | 2.716400000  |
| H | 4.087277000  | 2.690437000  | 3.468677000  |
| H | 4.061475000  | -3.150197000 | 3.138067000  |
| H | -4.030349000 | 2.553857000  | 3.679975000  |
| H | -4.031391000 | -2.990822000 | 3.379680000  |
| C | 5.679759000  | -2.695577000 | -2.061628000 |
| C | -5.639033000 | -2.341013000 | -2.386634000 |
| C | 4.332114000  | -2.974195000 | -2.326207000 |
| C | -4.303799000 | -2.733887000 | -2.546333000 |
| C | 4.000811000  | -3.907448000 | -3.318049000 |
| C | -3.963574000 | -3.620693000 | -3.576143000 |
| C | 5.004429000  | -4.551552000 | -4.035411000 |
| C | -4.943586000 | -4.102490000 | -4.438925000 |
| C | 6.345042000  | -4.271497000 | -3.766962000 |
| C | -6.271473000 | -3.704735000 | -4.277082000 |
| C | 6.680977000  | -3.343455000 | -2.779370000 |
| C | -6.617910000 | -2.825588000 | -3.249517000 |
| C | 5.629801000  | 3.044062000  | -1.555908000 |
| C | -5.690093000 | 2.736949000  | -1.837829000 |
| C | 4.290730000  | 3.233202000  | -1.921642000 |
| C | -4.346779000 | 3.013259000  | -2.124173000 |
| C | 3.959481000  | 4.242971000  | -2.834531000 |

|   |              |              |              |
|---|--------------|--------------|--------------|
| C | -4.028719000 | 4.023699000  | -3.040801000 |
| C | 4.954669000  | 5.053405000  | -3.373314000 |
| C | -5.041584000 | 4.747119000  | -3.663452000 |
| C | 6.286435000  | 4.863998000  | -3.000877000 |
| C | -6.378187000 | 4.466307000  | -3.375803000 |
| C | 6.622414000  | 3.859504000  | -2.091905000 |
| C | -6.701020000 | 3.461393000  | -2.462512000 |
| H | 5.922019000  | -1.966379000 | -1.286174000 |
| H | -5.887513000 | -1.648084000 | -1.580497000 |
| H | 2.953490000  | -4.126706000 | -3.531680000 |
| H | -2.922194000 | -3.931405000 | -3.682755000 |
| H | 4.733263000  | -5.276510000 | -4.806512000 |
| H | -4.671074000 | -4.791876000 | -5.241382000 |
| H | 7.730416000  | -3.124815000 | -2.569169000 |
| H | -7.657621000 | -2.515158000 | -3.123598000 |
| H | 5.871299000  | 2.252119000  | -0.844370000 |
| H | -5.920926000 | 1.948925000  | -1.118623000 |
| H | 2.913559000  | 4.372341000  | -3.120204000 |
| H | -2.977922000 | 4.231378000  | -3.250894000 |
| H | 4.693052000  | 5.836277000  | -4.088812000 |
| H | -4.789712000 | 5.534956000  | -4.376944000 |
| H | 7.664934000  | 3.712192000  | -1.800916000 |
| H | -7.747328000 | 3.243418000  | -2.236766000 |
| H | -7.041006000 | -4.082439000 | -4.954775000 |
| H | 7.132986000  | -4.778664000 | -4.329285000 |
| H | -7.172733000 | 5.034755000  | -3.865352000 |
| H | 7.066897000  | 5.502029000  | -3.422547000 |
| H | -1.934843000 | -2.947204000 | 0.620753000  |
| H | -0.884402000 | 1.356418000  | 5.100616000  |
| H | -0.014102000 | 0.061896000  | 4.805105000  |
| H | 0.033176000  | 4.014790000  | 0.600279000  |
| H | 0.684028000  | 4.274582000  | 2.656132000  |
| H | 0.918471000  | 4.287966000  | -0.684272000 |
| H | 1.962500000  | -0.183875000 | 3.585555000  |
| H | -1.938144000 | 2.798989000  | 0.828402000  |
| H | -0.634488000 | -2.008895000 | 5.083786000  |
| H | 0.893911000  | -4.464928000 | 2.168993000  |
| H | 0.808831000  | -4.391480000 | -1.096631000 |
| H | 0.033054000  | -4.165317000 | 0.871074000  |
| O | -1.063270000 | -0.101191000 | 2.193310000  |
| O | -3.622058000 | 1.292276000  | 2.167241000  |
| O | -3.612809000 | 1.347414000  | -0.624745000 |
| O | -3.613545000 | -1.508078000 | 2.089060000  |
| O | -2.051673000 | -2.652881000 | 3.243310000  |
| O | 0.041032000  | -4.106370000 | 1.887100000  |
| O | 2.076006000  | -2.838630000 | 2.983279000  |

|    |              |              |              |
|----|--------------|--------------|--------------|
| O  | 2.059202000  | -2.586915000 | -1.826161000 |
| O  | 3.638708000  | -1.526488000 | 2.030215000  |
| O  | 3.613407000  | -1.420007000 | -0.702555000 |
| O  | 3.648655000  | 1.284048000  | 2.102229000  |
| O  | 3.597648000  | 1.389413000  | -0.626240000 |
| O  | 2.021117000  | 2.662275000  | -1.590817000 |
| O  | 2.099820000  | 2.453118000  | 3.248481000  |
| O  | 1.065680000  | 1.397262000  | 0.745719000  |
| O  | 1.411944000  | -0.125478000 | 2.794860000  |
| O  | 0.037729000  | -1.533318000 | 4.581590000  |
| O  | -0.029267000 | 1.078100000  | 4.744492000  |
| O  | 1.069865000  | -1.542259000 | 0.693698000  |
| O  | -1.384637000 | -2.157708000 | 0.692322000  |
| O  | -2.044802000 | -2.466119000 | -1.913857000 |
| O  | 0.033176000  | -3.952999000 | -0.726201000 |
| O  | -3.619636000 | -1.432352000 | -0.697803000 |
| O  | -0.005453000 | 3.785654000  | 2.191507000  |
| O  | 0.049192000  | 3.959471000  | -0.415789000 |
| O  | -1.390870000 | 2.005292000  | 0.782290000  |
| O  | -2.048815000 | 2.245407000  | 3.466523000  |
| O  | -2.067029000 | 2.504791000  | -1.766536000 |
| O  | 1.381495000  | -0.018542000 | -1.349363000 |
| O  | -1.074333000 | -0.051689000 | -0.739471000 |
| H  | 1.925676000  | 0.016954000  | -2.145431000 |
| O  | -0.045997000 | 1.349581000  | -3.146450000 |
| H  | -0.833755000 | 1.672831000  | -3.603309000 |
| Zr | 2.530180000  | -0.072527000 | 0.700784000  |
| Zr | -0.013944000 | -1.878348000 | 2.505784000  |
| Zr | 0.034696000  | 1.708381000  | 2.524770000  |
| Zr | -0.039878000 | 1.734547000  | -1.060381000 |
| Zr | -2.534490000 | -0.076437000 | 0.723107000  |
| Zr | 0.015598000  | -1.867840000 | -1.077028000 |
| C  | -0.521874000 | -1.798578000 | -4.410916000 |
| C  | -0.822154000 | -0.846825000 | -5.559495000 |
| C  | -0.864615000 | -1.835254000 | -6.722321000 |
| C  | 0.440827000  | -2.797526000 | -5.035433000 |
| C  | -0.661595000 | -1.270378000 | -8.111844000 |
| C  | 0.266097000  | -4.213127000 | -4.547227000 |
| H  | -1.391806000 | -0.466007000 | -8.279903000 |
| H  | 0.030011000  | -0.158492000 | -5.696882000 |
| H  | -1.465069000 | -2.303272000 | -4.134951000 |
| H  | 1.155303000  | -4.973323000 | -6.062208000 |
| H  | 0.349293000  | -0.836872000 | -8.198364000 |
| H  | -0.204613000 | -2.922152000 | -8.986635000 |
| H  | -0.775801000 | -4.530594000 | -4.756630000 |
| H  | 0.393243000  | -4.238872000 | -3.451783000 |



|   |              |              |              |
|---|--------------|--------------|--------------|
| H | -2.723139000 | -0.669487000 | -5.495248000 |
| H | -2.266424000 | -2.852444000 | -7.533550000 |
| H | -0.038528000 | -0.145167000 | -3.299095000 |
| H | 1.481016000  | -2.469372000 | -4.852908000 |
| O | 0.023192000  | -1.184710000 | -3.268216000 |
| O | -0.909998000 | -2.268392000 | -9.075188000 |
| O | 1.207314000  | -5.091194000 | -5.105389000 |
| O | -2.110062000 | -2.476453000 | -6.652178000 |
| O | -1.968029000 | -0.066002000 | -5.418060000 |
| O | 0.198205000  | -2.738925000 | -6.457081000 |

## Zr-NU-1000 adsorption O5 mode

|   |              |              |              |
|---|--------------|--------------|--------------|
| C | -3.248184000 | -2.182850000 | -1.650098000 |
| C | -3.229715000 | -2.386601000 | 2.899990000  |
| C | -3.232292000 | 2.034305000  | 3.104012000  |
| C | 3.276888000  | 2.142018000  | 2.939210000  |
| C | 3.226910000  | 2.366317000  | -1.338692000 |
| C | 3.259301000  | -2.277949000 | -1.561551000 |
| C | -3.265283000 | 2.236128000  | -1.457275000 |
| C | 3.257175000  | -2.506569000 | 2.716404000  |
| H | 4.086653000  | 2.698129000  | 3.461475000  |
| H | 4.061821000  | -3.142643000 | 3.148200000  |
| H | -4.030091000 | 2.551522000  | 3.682057000  |
| H | -4.030490000 | -2.987428000 | 3.384939000  |
| C | 5.644212000  | -2.460319000 | -2.300798000 |
| C | -5.664712000 | -2.606118000 | -2.168127000 |
| C | 4.316271000  | -2.893479000 | -2.410289000 |
| C | -4.314218000 | -2.857675000 | -2.441899000 |
| C | 3.987133000  | -3.878454000 | -3.351082000 |
| C | -3.970043000 | -3.748326000 | -3.466745000 |
| C | 4.970271000  | -4.419786000 | -4.172615000 |
| C | -4.964630000 | -4.379148000 | -4.208156000 |
| C | 6.289416000  | -3.977658000 | -4.064520000 |
| C | -6.308964000 | -4.123637000 | -3.932394000 |
| C | 6.625173000  | -2.999377000 | -3.127776000 |
| C | -6.657550000 | -3.237044000 | -2.912362000 |
| C | 5.611868000  | 3.114486000  | -1.449359000 |
| C | -5.690068000 | 2.713077000  | -1.869162000 |
| C | 4.293984000  | 3.233505000  | -1.911567000 |
| C | -4.345879000 | 3.016694000  | -2.121954000 |
| C | 3.990942000  | 4.159346000  | -2.919710000 |
| C | -4.025339000 | 4.059066000  | -3.001602000 |
| C | 4.999815000  | 4.955180000  | -3.456951000 |
| C | -5.037051000 | 4.787537000  | -3.620338000 |
| C | 6.308780000  | 4.840442000  | -2.986635000 |
| C | -6.374445000 | 4.478661000  | -3.367170000 |

|   |              |              |              |
|---|--------------|--------------|--------------|
| C | 6.613579000  | 3.920360000  | -1.981730000 |
| C | -6.699516000 | 3.441327000  | -2.491675000 |
| H | 5.886073000  | -1.693064000 | -1.562640000 |
| H | -5.915777000 | -1.910106000 | -1.365464000 |
| H | 2.949249000  | -4.209222000 | -3.428402000 |
| H | -2.912555000 | -3.934737000 | -3.663486000 |
| H | 4.709138000  | -5.186753000 | -4.905190000 |
| H | -4.693130000 | -5.074855000 | -5.005467000 |
| H | 7.658267000  | -2.654981000 | -3.043857000 |
| H | -7.709897000 | -3.038072000 | -2.697226000 |
| H | 5.829270000  | 2.384793000  | -0.666728000 |
| H | -5.922816000 | 1.899440000  | -1.179690000 |
| H | 2.967309000  | 4.223988000  | -3.295606000 |
| H | -2.974050000 | 4.289629000  | -3.184694000 |
| H | 4.763761000  | 5.669820000  | -4.248856000 |
| H | -4.783453000 | 5.601529000  | -4.303162000 |
| H | 7.638468000  | 3.830816000  | -1.614608000 |
| H | -7.746498000 | 3.200776000  | -2.293951000 |
| H | -7.089329000 | -4.618954000 | -4.515335000 |
| H | 7.060259000  | -4.397760000 | -4.714858000 |
| H | -7.168017000 | 5.050508000  | -3.854270000 |
| H | 7.097080000  | 5.469709000  | -3.407082000 |
| H | -1.943811000 | -2.939668000 | 0.599870000  |
| H | -0.882750000 | 1.355478000  | 5.098321000  |
| H | -0.015248000 | 0.058763000  | 4.798621000  |
| H | 0.058681000  | 4.017149000  | 0.594200000  |
| H | 0.688415000  | 4.272845000  | 2.652973000  |
| H | 0.905372000  | 4.324776000  | -0.718091000 |
| H | 1.961311000  | -0.187482000 | 3.577259000  |
| H | -1.933296000 | 2.801730000  | 0.820362000  |
| H | -0.629773000 | -2.011213000 | 5.079096000  |
| H | 0.894435000  | -4.458651000 | 2.141124000  |
| H | 0.737702000  | -4.397428000 | -1.133559000 |
| H | 0.015421000  | -4.159072000 | 0.853734000  |
| O | -1.061397000 | -0.100344000 | 2.178694000  |
| O | -3.620882000 | 1.292013000  | 2.166860000  |
| O | -3.614421000 | 1.349715000  | -0.623561000 |
| O | -3.613722000 | -1.507076000 | 2.090140000  |
| O | -2.050089000 | -2.656952000 | 3.235486000  |
| O | 0.036732000  | -4.103043000 | 1.870377000  |
| O | 2.075263000  | -2.841239000 | 2.976910000  |
| O | 2.059924000  | -2.635031000 | -1.763679000 |
| O | 3.637653000  | -1.530428000 | 2.023600000  |
| O | 3.619813000  | -1.413655000 | -0.712075000 |
| O | 3.648060000  | 1.274618000  | 2.112051000  |
| O | 3.587887000  | 1.417417000  | -0.589699000 |

|    |              |              |              |
|----|--------------|--------------|--------------|
| O  | 2.023633000  | 2.616282000  | -1.664161000 |
| O  | 2.099048000  | 2.453211000  | 3.247763000  |
| O  | 1.073829000  | 1.404355000  | 0.743916000  |
| O  | 1.409004000  | -0.129176000 | 2.787699000  |
| O  | 0.036324000  | -1.531894000 | 4.572365000  |
| O  | -0.029680000 | 1.075599000  | 4.738493000  |
| O  | 1.056124000  | -1.542090000 | 0.685364000  |
| O  | -1.395163000 | -2.149011000 | 0.673790000  |
| O  | -2.045861000 | -2.405224000 | -1.961879000 |
| O  | -0.014986000 | -3.942409000 | -0.737268000 |
| O  | -3.618891000 | -1.417617000 | -0.704861000 |
| O  | 0.001515000  | 3.786165000  | 2.182030000  |
| O  | 0.063400000  | 3.953780000  | -0.422091000 |
| O  | -1.388050000 | 2.006395000  | 0.776840000  |
| O  | -2.047727000 | 2.247474000  | 3.463700000  |
| O  | -2.068398000 | 2.502952000  | -1.767340000 |
| O  | 1.384655000  | -0.031185000 | -1.353325000 |
| O  | -1.079461000 | -0.047052000 | -0.770090000 |
| H  | 1.923071000  | 0.000223000  | -2.159581000 |
| O  | -0.051220000 | 1.515847000  | -3.158485000 |
| H  | -0.946068000 | 1.678478000  | -3.485023000 |
| Zr | 2.523586000  | -0.078736000 | 0.701588000  |
| Zr | -0.019853000 | -1.880615000 | 2.496761000  |
| Zr | 0.034822000  | 1.709584000  | 2.522253000  |
| Zr | -0.036381000 | 1.732292000  | -1.055285000 |
| Zr | -2.538702000 | -0.076463000 | 0.712780000  |
| Zr | 0.010147000  | -1.861673000 | -1.095657000 |
| C  | 2.094175000  | -1.332193000 | -6.619171000 |
| C  | 3.104699000  | -0.308930000 | -6.058483000 |
| C  | 2.212703000  | 0.711200000  | -5.296553000 |
| C  | 0.898840000  | -1.158679000 | -5.687633000 |
| C  | 2.246485000  | 2.151204000  | -5.779576000 |
| C  | 1.027271000  | -1.860568000 | -4.351878000 |
| H  | 3.294655000  | 2.489431000  | -5.844677000 |
| H  | 3.587220000  | 0.193015000  | -6.920967000 |
| H  | 2.535212000  | -2.340054000 | -6.603872000 |
| H  | 0.124901000  | -0.301241000 | -3.488249000 |
| H  | 1.830179000  | 2.178710000  | -6.805841000 |
| H  | 0.838291000  | 2.511504000  | -4.454600000 |
| H  | 2.067987000  | -1.799888000 | -3.998198000 |
| H  | 0.780185000  | -2.928244000 | -4.450148000 |
| H  | 4.138549000  | -0.403964000 | -4.437358000 |
| H  | 2.261132000  | 1.521514000  | -3.544441000 |
| H  | 1.224507000  | -0.227493000 | -7.934883000 |
| H  | -0.047996000 | -1.419877000 | -6.184367000 |
| O  | 1.734953000  | -1.047639000 | -7.947132000 |

|   |             |              |              |
|---|-------------|--------------|--------------|
| O | 1.573111000 | 2.996873000  | -4.894806000 |
| O | 0.133925000 | -1.296965000 | -3.398319000 |
| O | 2.579353000 | 0.682330000  | -3.933832000 |
| O | 4.055467000 | -0.929155000 | -5.246819000 |
| O | 0.877591000 | 0.256898000  | -5.497520000 |

## Zr-NU-1000 adsorption O6 mode

|   |              |              |              |
|---|--------------|--------------|--------------|
| C | -3.248206000 | -2.182808000 | -1.650101000 |
| C | -3.229697000 | -2.386599000 | 2.899994000  |
| C | -3.232298000 | 2.034296000  | 3.104003000  |
| C | 3.276894000  | 2.141996000  | 2.939183000  |
| C | 3.226890000  | 2.366296000  | -1.338701000 |
| C | 3.259332000  | -2.277910000 | -1.561464000 |
| C | -3.265308000 | 2.236126000  | -1.457290000 |
| C | 3.257192000  | -2.506596000 | 2.716376000  |
| H | 4.089215000  | 2.684282000  | 3.471035000  |
| H | 4.062722000  | -3.141268000 | 3.148611000  |
| H | -4.029781000 | 2.553423000  | 3.680450000  |
| H | -4.031045000 | -2.986155000 | 3.385355000  |
| C | 5.674809000  | -2.611794000 | -2.143082000 |
| C | -5.666159000 | -2.574266000 | -2.186369000 |
| C | 4.334048000  | -2.982804000 | -2.318419000 |
| C | -4.316859000 | -2.840705000 | -2.452058000 |
| C | 4.015616000  | -4.018038000 | -3.210363000 |
| C | -3.976050000 | -3.729808000 | -3.479417000 |
| C | 5.022485000  | -4.667925000 | -3.918538000 |
| C | -4.972838000 | -4.344083000 | -4.231619000 |
| C | 6.353867000  | -4.288592000 | -3.742830000 |
| C | -6.315903000 | -4.073991000 | -3.963751000 |
| C | 6.678354000  | -3.261848000 | -2.855316000 |
| C | -6.661140000 | -3.189151000 | -2.941051000 |
| C | 5.641614000  | 2.904782000  | -1.696471000 |
| C | -5.687329000 | 2.718660000  | -1.868800000 |
| C | 4.296543000  | 3.263505000  | -1.854320000 |
| C | -4.342557000 | 3.024470000  | -2.116560000 |
| C | 3.974248000  | 4.466588000  | -2.494873000 |
| C | -4.020724000 | 4.075940000  | -2.984861000 |
| C | 4.983005000  | 5.299314000  | -2.967209000 |
| C | -5.031265000 | 4.810703000  | -3.597903000 |
| C | 6.321683000  | 4.931908000  | -2.815722000 |
| C | -6.369019000 | 4.498773000  | -3.350662000 |
| C | 6.650069000  | 3.733084000  | -2.181597000 |
| C | -6.695586000 | 3.452704000  | -2.486183000 |
| H | 5.906948000  | -1.806019000 | -1.443963000 |
| H | -5.914762000 | -1.879836000 | -1.381580000 |
| H | 2.969406000  | -4.307257000 | -3.334107000 |

|   |              |              |              |
|---|--------------|--------------|--------------|
| H | -2.919592000 | -3.927702000 | -3.670220000 |
| H | 4.769599000  | -5.470581000 | -4.614383000 |
| H | -4.703990000 | -5.037864000 | -5.031450000 |
| H | 7.720370000  | -2.963421000 | -2.723272000 |
| H | -7.712531000 | -2.978848000 | -2.732171000 |
| H | 5.878300000  | 1.966902000  | -1.189962000 |
| H | -5.921419000 | 1.898285000  | -1.187834000 |
| H | 2.924527000  | 4.725045000  | -2.637367000 |
| H | -2.969567000 | 4.310690000  | -3.162947000 |
| H | 4.726384000  | 6.236040000  | -3.466945000 |
| H | -4.776487000 | 5.631978000  | -4.271417000 |
| H | 7.697086000  | 3.445649000  | -2.061908000 |
| H | -7.742857000 | 3.209849000  | -2.293089000 |
| H | -7.097979000 | -4.556315000 | -4.555208000 |
| H | 7.142585000  | -4.792904000 | -4.305386000 |
| H | -7.161700000 | 5.075227000  | -3.833667000 |
| H | 7.112673000  | 5.583955000  | -3.194347000 |
| H | -1.935035000 | -2.944690000 | 0.602102000  |
| H | -0.882228000 | 1.351024000  | 5.104295000  |
| H | -0.015085000 | 0.054292000  | 4.800994000  |
| H | 0.029941000  | 4.013536000  | 0.593922000  |
| H | 0.684617000  | 4.272637000  | 2.650052000  |
| H | 0.909913000  | 4.285737000  | -0.694636000 |
| H | 1.964910000  | -0.186708000 | 3.574448000  |
| H | -1.930380000 | 2.794051000  | 0.811513000  |
| H | -0.632706000 | -2.013879000 | 5.075193000  |
| H | 0.894646000  | -4.463217000 | 2.159455000  |
| H | 0.740156000  | -4.418215000 | -1.143709000 |
| H | 0.031667000  | -4.164306000 | 0.861153000  |
| O | -1.058742000 | -0.103063000 | 2.177382000  |
| O | -3.619839000 | 1.292150000  | 2.166243000  |
| O | -3.613997000 | 1.356581000  | -0.618561000 |
| O | -3.612659000 | -1.508191000 | 2.087873000  |
| O | -2.050018000 | -2.656107000 | 3.236030000  |
| O | 0.041537000  | -4.105116000 | 1.877760000  |
| O | 2.075829000  | -2.840732000 | 2.980589000  |
| O | 2.060334000  | -2.596090000 | -1.820418000 |
| O | 3.635714000  | -1.532355000 | 2.019012000  |
| O | 3.618154000  | -1.416335000 | -0.714862000 |
| O | 3.643169000  | 1.292745000  | 2.089600000  |
| O | 3.593156000  | 1.354735000  | -0.669553000 |
| O | 2.016984000  | 2.669969000  | -1.567517000 |
| O | 2.099780000  | 2.448440000  | 3.254638000  |
| O | 1.067941000  | 1.399461000  | 0.742799000  |
| O | 1.411530000  | -0.127884000 | 2.785706000  |
| O | 0.036396000  | -1.535098000 | 4.571785000  |

|    |              |              |              |
|----|--------------|--------------|--------------|
| O  | -0.030605000 | 1.071194000  | 4.741051000  |
| O  | 1.068099000  | -1.543404000 | 0.680627000  |
| O  | -1.387810000 | -2.153086000 | 0.677112000  |
| O  | -2.046936000 | -2.423434000 | -1.947681000 |
| O  | 0.011102000  | -3.944666000 | -0.726884000 |
| O  | -3.616515000 | -1.410767000 | -0.708053000 |
| O  | -0.003628000 | 3.780442000  | 2.186855000  |
| O  | 0.042527000  | 3.954588000  | -0.421432000 |
| O  | -1.384784000 | 1.998618000  | 0.773108000  |
| O  | -2.047513000 | 2.244458000  | 3.465307000  |
| O  | -2.064486000 | 2.489856000  | -1.778627000 |
| O  | 1.372623000  | -0.016602000 | -1.367760000 |
| O  | -1.078433000 | -0.050376000 | -0.773344000 |
| H  | 1.910927000  | 0.019786000  | -2.180519000 |
| O  | -0.081149000 | 1.457320000  | -3.208105000 |
| H  | -0.914879000 | 1.871902000  | -3.475273000 |
| Zr | 2.528681000  | -0.070180000 | 0.685834000  |
| Zr | -0.013788000 | -1.880816000 | 2.496845000  |
| Zr | 0.033872000  | 1.706804000  | 2.527328000  |
| Zr | -0.022495000 | 1.725419000  | -1.055183000 |
| Zr | -2.536946000 | -0.078475000 | 0.712649000  |
| Zr | 0.015694000  | -1.865170000 | -1.088305000 |
| C  | 4.024219000  | -0.464501000 | -5.724693000 |
| C  | 2.630218000  | -0.993495000 | -6.167202000 |
| C  | 1.675902000  | -0.567969000 | -5.014992000 |
| C  | 3.675966000  | 0.550086000  | -4.646331000 |
| C  | 0.860632000  | -1.709471000 | -4.443330000 |
| C  | 3.340345000  | 1.915703000  | -5.237445000 |
| H  | 0.225709000  | -2.107840000 | -5.251923000 |
| H  | 2.706913000  | -2.096574000 | -6.207290000 |
| H  | 4.508130000  | 0.005543000  | -6.593792000 |
| H  | 1.832738000  | 2.218960000  | -4.043708000 |
| H  | 1.517852000  | -2.512638000 | -4.083843000 |
| H  | -0.167526000 | -0.327598000 | -3.399150000 |
| H  | 2.864567000  | 1.772626000  | -6.228109000 |
| H  | 4.292794000  | 2.438444000  | -5.429668000 |
| H  | 1.535160000  | 0.151448000  | -7.231701000 |
| H  | 0.457518000  | 0.920963000  | -4.734079000 |
| H  | 4.547574000  | -1.830001000 | -4.450573000 |
| H  | 4.446039000  | 0.626154000  | -3.862079000 |
| O  | 4.885341000  | -1.478035000 | -5.285348000 |
| O  | 0.045617000  | -1.298822000 | -3.353247000 |
| O  | 2.580648000  | 2.725586000  | -4.399901000 |
| O  | 0.834536000  | 0.431925000  | -5.508195000 |
| O  | 2.208591000  | -0.524319000 | -7.408086000 |
| O  | 2.527417000  | -0.050566000 | -3.995850000 |

## Zr-NU-1000 TS1

|   |              |              |              |
|---|--------------|--------------|--------------|
| C | -3.248200000 | -2.182800000 | -1.650100000 |
| C | -3.229700000 | -2.386600000 | 2.900000000  |
| C | -3.232300000 | 2.034300000  | 3.104000000  |
| C | 3.276900000  | 2.142000000  | 2.939200000  |
| C | 3.226900000  | 2.366300000  | -1.338700000 |
| C | 3.259300000  | -2.277900000 | -1.561500000 |
| C | -3.265300000 | 2.236100000  | -1.457300000 |
| C | 3.257200000  | -2.506600000 | 2.716400000  |
| H | 4.087891000  | 2.710815000  | 3.446078000  |
| H | 4.060507000  | -3.138434000 | 3.157008000  |
| H | -4.030501000 | 2.572073000  | 3.662682000  |
| H | -4.033486000 | -2.971029000 | 3.399688000  |
| C | 5.663307000  | -2.722645000 | -2.113094000 |
| C | -5.636272000 | -2.262570000 | -2.386709000 |
| C | 4.310194000  | -3.030516000 | -2.301031000 |
| C | -4.346416000 | -2.808788000 | -2.440728000 |
| C | 3.948505000  | -4.052754000 | -3.189952000 |
| C | -4.105469000 | -3.924686000 | -3.252778000 |
| C | 4.930295000  | -4.756018000 | -3.882225000 |
| C | -5.134639000 | -4.480078000 | -4.007146000 |
| C | 6.277295000  | -4.442066000 | -3.693702000 |
| C | -6.412581000 | -3.922946000 | -3.958825000 |
| C | 6.642200000  | -3.425357000 | -2.809716000 |
| C | -6.662119000 | -2.814308000 | -3.147949000 |
| C | 5.636564000  | 2.935768000  | -1.722455000 |
| C | -5.685391000 | 2.730914000  | -1.864062000 |
| C | 4.286250000  | 3.171226000  | -2.011480000 |
| C | -4.341369000 | 2.954863000  | -2.191715000 |
| C | 3.941236000  | 4.162864000  | -2.938970000 |
| C | -4.019137000 | 3.849389000  | -3.220328000 |
| C | 4.933449000  | 4.909864000  | -3.567499000 |
| C | -5.029221000 | 4.510723000  | -3.912191000 |
| C | 6.276865000  | 4.673999000  | -3.271606000 |
| C | -6.366053000 | 4.287100000  | -3.579429000 |
| C | 6.626740000  | 3.686978000  | -2.348795000 |
| C | -6.693084000 | 3.397714000  | -2.554440000 |
| H | 5.926659000  | -1.925315000 | -1.415660000 |
| H | -5.811449000 | -1.396832000 | -1.745041000 |
| H | 2.888604000  | -4.286415000 | -3.323813000 |
| H | -3.104951000 | -4.361500000 | -3.288520000 |
| H | 4.645948000  | -5.554692000 | -4.571102000 |
| H | -4.934859000 | -5.346362000 | -4.640941000 |
| H | 7.696729000  | -3.180866000 | -2.663708000 |
| H | -7.662913000 | -2.378300000 | -3.110369000 |

|   |              |              |              |
|---|--------------|--------------|--------------|
| H | 5.888883000  | 2.157412000  | -0.999920000 |
| H | -5.919509000 | 2.031178000  | -1.059518000 |
| H | 2.885795000  | 4.330226000  | -3.163434000 |
| H | -2.969106000 | 4.007998000  | -3.470919000 |
| H | 4.660252000  | 5.679280000  | -4.293193000 |
| H | -4.774409000 | 5.203414000  | -4.717300000 |
| H | 7.678468000  | 3.502520000  | -2.118462000 |
| H | -7.739690000 | 3.224370000  | -2.293896000 |
| H | -7.218890000 | -4.354958000 | -4.556383000 |
| H | 7.047289000  | -4.994033000 | -4.238134000 |
| H | -7.158022000 | 4.808325000  | -4.122815000 |
| H | 7.055407000  | 5.261649000  | -3.764091000 |
| H | -1.913487000 | -2.935425000 | 0.577630000  |
| H | -0.888743000 | 1.303334000  | 5.130928000  |
| H | -0.016697000 | 0.012482000  | 4.809105000  |
| H | 0.037824000  | 4.031599000  | 0.673832000  |
| H | 0.688703000  | 4.258562000  | 2.719449000  |
| H | 0.920500000  | 4.331040000  | -0.609862000 |
| H | 1.967151000  | -0.212776000 | 3.583403000  |
| H | -1.935618000 | 2.805575000  | 0.848890000  |
| H | -0.636687000 | -2.049174000 | 5.053131000  |
| H | 0.903226000  | -4.467611000 | 2.108981000  |
| H | 0.663785000  | -4.390295000 | -1.264173000 |
| H | 0.048956000  | -4.150344000 | 0.806419000  |
| O | -1.056387000 | -0.106142000 | 2.189906000  |
| O | -3.619213000 | 1.291621000  | 2.167489000  |
| O | -3.615710000 | 1.373472000  | -0.598700000 |
| O | -3.610371000 | -1.509208000 | 2.084168000  |
| O | -2.049534000 | -2.670784000 | 3.220398000  |
| O | 0.052014000  | -4.105143000 | 1.827699000  |
| O | 2.075082000  | -2.848608000 | 2.965443000  |
| O | 2.053377000  | -2.543115000 | -1.841440000 |
| O | 3.640372000  | -1.529331000 | 2.026939000  |
| O | 3.632371000  | -1.424558000 | -0.707286000 |
| O | 3.646710000  | 1.279885000  | 2.107799000  |
| O | 3.601221000  | 1.417574000  | -0.595618000 |
| O | 2.018418000  | 2.686625000  | -1.559510000 |
| O | 2.101354000  | 2.436943000  | 3.272972000  |
| O | 1.071458000  | 1.412623000  | 0.783381000  |
| O | 1.413442000  | -0.141696000 | 2.795968000  |
| O | 0.036064000  | -1.564671000 | 4.560286000  |
| O | -0.034447000 | 1.032701000  | 4.767120000  |
| O | 1.071503000  | -1.534851000 | 0.671511000  |
| O | -1.380438000 | -2.134718000 | 0.656234000  |
| O | -2.054378000 | -2.473054000 | -1.949432000 |
| O | -0.003822000 | -3.910512000 | -0.758294000 |



|    |              |              |              |
|----|--------------|--------------|--------------|
| O  | -3.588441000 | -1.379796000 | -0.733451000 |
| O  | -0.005613000 | 3.779223000  | 2.251872000  |
| O  | 0.057424000  | 3.984795000  | -0.344590000 |
| O  | -1.383100000 | 2.014919000  | 0.813848000  |
| O  | -2.051676000 | 2.226043000  | 3.487470000  |
| O  | -2.060474000 | 2.513808000  | -1.742840000 |
| O  | 1.403074000  | 0.027477000  | -1.320271000 |
| O  | -1.070568000 | -0.017756000 | -0.760283000 |
| H  | 1.909305000  | 0.011640000  | -2.158090000 |
| O  | -0.035617000 | 1.429095000  | -3.140563000 |
| H  | -0.861270000 | 1.763836000  | -3.529592000 |
| Zr | 2.535954000  | -0.073324000 | 0.695872000  |
| Zr | -0.008530000 | -1.892782000 | 2.476970000  |
| Zr | 0.035471000  | 1.696722000  | 2.565461000  |
| Zr | -0.015134000 | 1.765401000  | -0.992105000 |
| Zr | -2.524172000 | -0.066292000 | 0.723000000  |
| Zr | 0.032267000  | -1.825459000 | -1.127621000 |
| C  | -1.716372000 | -2.380573000 | -5.225257000 |
| C  | -0.281567000 | -2.755528000 | -4.818658000 |
| C  | 0.341055000  | -1.389209000 | -4.523159000 |
| C  | -1.607726000 | -0.926351000 | -5.700055000 |
| C  | 1.852206000  | -1.255890000 | -4.648031000 |
| C  | -2.485485000 | 0.062374000  | -4.949384000 |
| H  | 2.330660000  | -2.125582000 | -4.181046000 |
| H  | 0.240132000  | -3.197808000 | -5.689189000 |
| H  | -2.336599000 | -2.411417000 | -4.317318000 |
| H  | -1.169401000 | 1.347338000  | -5.477450000 |
| H  | 2.121267000  | -1.253313000 | -5.718542000 |
| H  | 1.810619000  | 0.659032000  | -4.237620000 |
| H  | -2.412372000 | -0.134733000 | -3.860146000 |
| H  | -3.541833000 | -0.079157000 | -5.230217000 |
| H  | -0.965147000 | -3.552087000 | -3.184021000 |
| H  | -0.090449000 | 0.147428000  | -3.216659000 |
| H  | -1.795023000 | -3.307810000 | -6.921324000 |
| H  | -1.808851000 | -0.851538000 | -6.782831000 |
| O  | -2.332430000 | -3.264383000 | -6.121361000 |
| O  | 2.344848000  | -0.111246000 | -3.983161000 |
| O  | -2.110121000 | 1.388457000  | -5.248576000 |
| O  | -0.100136000 | -0.996749000 | -3.257763000 |
| O  | -0.182036000 | -3.658066000 | -3.754664000 |
| O  | -0.232137000 | -0.547690000 | -5.516054000 |

## Zr-NU-1000 Int1

|   |              |              |              |
|---|--------------|--------------|--------------|
| C | -3.248200000 | -2.182800000 | -1.650100000 |
| C | -3.229700000 | -2.386600000 | 2.900000000  |
| C | -3.232300000 | 2.034300000  | 3.104000000  |

|   |              |              |              |
|---|--------------|--------------|--------------|
| C | 3.276900000  | 2.142000000  | 2.939200000  |
| C | 3.226900000  | 2.366300000  | -1.338700000 |
| C | 3.259300000  | -2.277900000 | -1.561500000 |
| C | -3.265300000 | 2.236100000  | -1.457300000 |
| C | 3.257200000  | -2.506600000 | 2.716400000  |
| H | 4.088579000  | 2.715207000  | 3.440269000  |
| H | 4.060121000  | -3.127618000 | 3.172667000  |
| H | -4.029260000 | 2.580579000  | 3.656220000  |
| H | -4.031973000 | -2.967990000 | 3.405660000  |
| C | 5.656735000  | -2.550605000 | -2.249221000 |
| C | -5.655209000 | -2.319171000 | -2.321601000 |
| C | 4.329984000  | -2.996106000 | -2.313235000 |
| C | -4.352992000 | -2.829957000 | -2.414632000 |
| C | 4.015678000  | -4.121326000 | -3.088160000 |
| C | -4.104981000 | -3.936503000 | -3.237455000 |
| C | 5.015307000  | -4.788878000 | -3.790861000 |
| C | -5.140275000 | -4.516907000 | -3.964058000 |
| C | 6.333417000  | -4.333571000 | -3.731459000 |
| C | -6.431366000 | -3.996432000 | -3.875566000 |
| C | 6.652540000  | -3.213791000 | -2.961504000 |
| C | -6.687694000 | -2.897550000 | -3.053481000 |
| C | 5.634132000  | 2.927802000  | -1.750885000 |
| C | -5.681498000 | 2.684125000  | -1.931407000 |
| C | 4.281987000  | 3.151641000  | -2.042083000 |
| C | -4.333626000 | 2.931000000  | -2.224705000 |
| C | 3.931555000  | 4.110582000  | -3.001291000 |
| C | -4.000345000 | 3.821872000  | -3.253018000 |
| C | 4.920445000  | 4.836056000  | -3.659821000 |
| C | -5.003524000 | 4.457980000  | -3.977915000 |
| C | 6.265496000  | 4.612659000  | -3.361540000 |
| C | -6.344440000 | 4.211422000  | -3.679445000 |
| C | 6.620839000  | 3.658691000  | -2.406442000 |
| C | -6.682350000 | 3.324852000  | -2.655535000 |
| H | 5.887013000  | -1.680227000 | -1.631258000 |
| H | -5.835236000 | -1.460479000 | -1.671949000 |
| H | 2.978887000  | -4.465980000 | -3.124593000 |
| H | -3.093631000 | -4.342565000 | -3.306418000 |
| H | 4.766737000  | -5.669641000 | -4.387225000 |
| H | -4.934290000 | -5.373717000 | -4.608668000 |
| H | 7.685094000  | -2.860584000 | -2.912597000 |
| H | -7.698879000 | -2.490079000 | -2.984505000 |
| H | 5.890517000  | 2.176885000  | -1.000946000 |
| H | -5.923706000 | 1.986100000  | -1.127764000 |
| H | 2.874966000  | 4.267294000  | -3.227158000 |
| H | -2.946913000 | 3.998976000  | -3.475536000 |
| H | 4.643112000  | 5.579210000  | -4.410848000 |

|   |              |              |              |
|---|--------------|--------------|--------------|
| H | -4.740174000 | 5.148910000  | -4.781817000 |
| H | 7.673752000  | 3.485593000  | -2.172465000 |
| H | -7.732185000 | 3.132879000  | -2.422660000 |
| H | -7.242704000 | -4.448824000 | -4.450976000 |
| H | 7.116849000  | -4.856587000 | -4.285179000 |
| H | -7.131096000 | 4.712303000  | -4.249034000 |
| H | 7.041026000  | 5.184601000  | -3.876733000 |
| H | -1.924589000 | -2.919023000 | 0.567711000  |
| H | -0.889045000 | 1.276780000  | 5.147032000  |
| H | -0.019171000 | -0.014166000 | 4.805668000  |
| H | 0.037581000  | 4.036729000  | 0.703336000  |
| H | 0.694756000  | 4.246750000  | 2.741051000  |
| H | 0.919423000  | 4.337570000  | -0.582332000 |
| H | 1.963356000  | -0.221716000 | 3.584546000  |
| H | -1.933146000 | 2.814043000  | 0.859371000  |
| H | -0.637106000 | -2.065259000 | 5.030314000  |
| H | 0.903597000  | -4.468622000 | 2.052263000  |
| H | 0.662814000  | -4.376227000 | -1.274408000 |
| H | 0.032315000  | -4.135094000 | 0.761825000  |
| O | -1.057199000 | -0.104535000 | 2.187138000  |
| O | -3.619662000 | 1.291258000  | 2.168950000  |
| O | -3.620657000 | 1.387612000  | -0.588736000 |
| O | -3.613804000 | -1.505569000 | 2.089124000  |
| O | -2.048120000 | -2.677045000 | 3.208066000  |
| O | 0.051020000  | -4.099286000 | 1.785146000  |
| O | 2.074941000  | -2.853203000 | 2.954189000  |
| O | 2.066413000  | -2.605727000 | -1.791205000 |
| O | 3.642448000  | -1.534997000 | 2.017936000  |
| O | 3.629499000  | -1.384887000 | -0.741587000 |
| O | 3.644165000  | 1.281665000  | 2.105155000  |
| O | 3.604644000  | 1.420540000  | -0.596343000 |
| O | 2.016650000  | 2.700068000  | -1.539320000 |
| O | 2.102016000  | 2.430948000  | 3.282421000  |
| O | 1.067615000  | 1.416202000  | 0.790740000  |
| O | 1.413945000  | -0.145075000 | 2.794643000  |
| O | 0.036422000  | -1.575794000 | 4.543473000  |
| O | -0.037099000 | 1.009599000  | 4.775508000  |
| O | 1.071864000  | -1.521287000 | 0.658894000  |
| O | -1.388761000 | -2.120179000 | 0.645034000  |
| O | -2.060151000 | -2.468884000 | -1.956532000 |
| O | -0.029851000 | -3.899559000 | -0.800478000 |
| O | -3.586634000 | -1.365333000 | -0.740378000 |
| O | -0.004277000 | 3.774197000  | 2.273448000  |
| O | 0.055829000  | 3.992593000  | -0.316672000 |
| O | -1.382911000 | 2.021544000  | 0.829584000  |
| O | -2.052575000 | 2.218666000  | 3.495768000  |

|    |              |              |              |
|----|--------------|--------------|--------------|
| O  | -2.055661000 | 2.517126000  | -1.731247000 |
| O  | 1.397991000  | 0.046422000  | -1.339571000 |
| O  | -1.074910000 | 0.004564000  | -0.764781000 |
| H  | 1.888206000  | -0.013853000 | -2.182488000 |
| O  | -0.030717000 | 1.457495000  | -3.181536000 |
| H  | -0.843310000 | 1.696234000  | -3.677566000 |
| Zr | 2.533763000  | -0.081976000 | 0.692096000  |
| Zr | -0.007695000 | -1.895721000 | 2.453711000  |
| Zr | 0.031573000  | 1.689002000  | 2.584441000  |
| Zr | -0.015348000 | 1.771552000  | -0.953922000 |
| Zr | -2.530214000 | -0.068416000 | 0.722004000  |
| Zr | 0.020533000  | -1.810002000 | -1.172883000 |
| C  | -1.730872000 | -2.429952000 | -5.227696000 |
| C  | -0.321968000 | -2.916702000 | -4.869066000 |
| C  | 0.393249000  | -1.608784000 | -4.486642000 |
| C  | -1.514364000 | -0.978468000 | -5.670538000 |
| C  | 1.903763000  | -1.644783000 | -4.652527000 |
| C  | -2.345217000 | 0.038165000  | -4.907865000 |
| H  | 2.267421000  | -2.598790000 | -4.234730000 |
| H  | 0.158871000  | -3.328258000 | -5.777579000 |
| H  | -2.330058000 | -2.436314000 | -4.305959000 |
| H  | -1.028577000 | 1.262581000  | -5.599285000 |
| H  | 2.146880000  | -1.618257000 | -5.728261000 |
| H  | 3.422733000  | -0.532968000 | -4.143883000 |
| H  | -2.269341000 | -0.169168000 | -3.822206000 |
| H  | -3.409315000 | -0.045238000 | -5.183683000 |
| H  | -0.893237000 | -3.682330000 | -3.183800000 |
| H  | 0.068109000  | 0.471620000  | -3.323694000 |
| H  | -1.894145000 | -3.344029000 | -6.923843000 |
| H  | -1.710283000 | -0.874526000 | -6.753604000 |
| O  | -2.435232000 | -3.237756000 | -6.132474000 |
| O  | 2.474539000  | -0.539778000 | -3.971471000 |
| O  | -1.897432000 | 1.359252000  | -5.179410000 |
| O  | 0.022634000  | -1.220169000 | -3.234471000 |
| O  | -0.264758000 | -3.911335000 | -3.891349000 |
| O  | -0.126315000 | -0.688772000 | -5.471266000 |

## Zr-NU-1000 TS2

|   |              |              |              |
|---|--------------|--------------|--------------|
| C | -3.248200000 | -2.182800000 | -1.650100000 |
| C | -3.229700000 | -2.386600000 | 2.900000000  |
| C | -3.232300000 | 2.034300000  | 3.104000000  |
| C | 3.276900000  | 2.142000000  | 2.939200000  |
| C | 3.226900000  | 2.366300000  | -1.338700000 |
| C | 3.259300000  | -2.277900000 | -1.561500000 |
| C | -3.265300000 | 2.236100000  | -1.457300000 |
| C | 3.257200000  | -2.506600000 | 2.716400000  |

|   |              |              |              |
|---|--------------|--------------|--------------|
| H | 4.089503000  | 2.688958000  | 3.467115000  |
| H | 4.063576000  | -3.146366000 | 3.140293000  |
| H | -4.029087000 | 2.560465000  | 3.675553000  |
| H | -4.030579000 | -2.992512000 | 3.378708000  |
| C | 5.641246000  | -2.382438000 | -2.351396000 |
| C | -5.667081000 | -2.290682000 | -2.289437000 |
| C | 4.331047000  | -2.875290000 | -2.416978000 |
| C | -4.349728000 | -2.722040000 | -2.500145000 |
| C | 4.030960000  | -3.917722000 | -3.305111000 |
| C | -4.082887000 | -3.635677000 | -3.527693000 |
| C | 5.026068000  | -4.456973000 | -4.116448000 |
| C | -5.113939000 | -4.107881000 | -4.334079000 |
| C | 6.327264000  | -3.955718000 | -4.051450000 |
| C | -6.421903000 | -3.674071000 | -4.118803000 |
| C | 6.633100000  | -2.918198000 | -3.169229000 |
| C | -6.697106000 | -2.765059000 | -3.095647000 |
| C | 5.648497000  | 2.922415000  | -1.682741000 |
| C | -5.686891000 | 2.701870000  | -1.877052000 |
| C | 4.303187000  | 3.188284000  | -1.970374000 |
| C | -4.343550000 | 3.028805000  | -2.105432000 |
| C | 3.980968000  | 4.226075000  | -2.854761000 |
| C | -4.025658000 | 4.103608000  | -2.945133000 |
| C | 4.988308000  | 4.984993000  | -3.444193000 |
| C | -5.039360000 | 4.843988000  | -3.544561000 |
| C | 6.326084000  | 4.715211000  | -3.152290000 |
| C | -6.375774000 | 4.511862000  | -3.317090000 |
| C | 6.654396000  | 3.684188000  | -2.270582000 |
| C | -6.698854000 | 3.439595000  | -2.483993000 |
| H | 5.861882000  | -1.577544000 | -1.647017000 |
| H | -5.861505000 | -1.576773000 | -1.486965000 |
| H | 3.007818000  | -4.299920000 | -3.343759000 |
| H | -3.057440000 | -3.967256000 | -3.699258000 |
| H | 4.787576000  | -5.273457000 | -4.801803000 |
| H | -4.892528000 | -4.810864000 | -5.139719000 |
| H | 7.652470000  | -2.529254000 | -3.115691000 |
| H | -7.721014000 | -2.422807000 | -2.928827000 |
| H | 5.884075000  | 2.113888000  | -0.988005000 |
| H | -5.917417000 | 1.862184000  | -1.218674000 |
| H | 2.930445000  | 4.428344000  | -3.074651000 |
| H | -2.976490000 | 4.345688000  | -3.118153000 |
| H | 4.730701000  | 5.791721000  | -4.134108000 |
| H | -4.787762000 | 5.682532000  | -4.197629000 |
| H | 7.701508000  | 3.475749000  | -2.039478000 |
| H | -7.744997000 | 3.179891000  | -2.306735000 |
| H | -7.231053000 | -4.042821000 | -4.753928000 |
| H | 7.107383000  | -4.378387000 | -4.689050000 |

|   |              |              |              |
|---|--------------|--------------|--------------|
| H | -7.170550000 | 5.092246000  | -3.792327000 |
| H | 7.116459000  | 5.312448000  | -3.613252000 |
| H | -1.940969000 | -2.931602000 | 0.604250000  |
| H | -0.882909000 | 1.355302000  | 5.106676000  |
| H | -0.013853000 | 0.059942000  | 4.806122000  |
| H | 0.023238000  | 4.010223000  | 0.609695000  |
| H | 0.683585000  | 4.272856000  | 2.663135000  |
| H | 0.898721000  | 4.290534000  | -0.677587000 |
| H | 1.964843000  | -0.177946000 | 3.580374000  |
| H | -1.947999000 | 2.792136000  | 0.817297000  |
| H | -0.637602000 | -2.004895000 | 5.082224000  |
| H | 0.898026000  | -4.457510000 | 2.150096000  |
| H | 0.743543000  | -4.404030000 | -1.130542000 |
| H | 0.021526000  | -4.160449000 | 0.859220000  |
| O | -1.058285000 | -0.099570000 | 2.180064000  |
| O | -3.622917000 | 1.290422000  | 2.169591000  |
| O | -3.617113000 | 1.342235000  | -0.628089000 |
| O | -3.613645000 | -1.504958000 | 2.092669000  |
| O | -2.050738000 | -2.653994000 | 3.240602000  |
| O | 0.041133000  | -4.101791000 | 1.877489000  |
| O | 2.077169000  | -2.837450000 | 2.989071000  |
| O | 2.077875000  | -2.665008000 | -1.758120000 |
| O | 3.635981000  | -1.531247000 | 2.020953000  |
| O | 3.619789000  | -1.404101000 | -0.720891000 |
| O | 3.645010000  | 1.283783000  | 2.100566000  |
| O | 3.593359000  | 1.396316000  | -0.620058000 |
| O | 2.027634000  | 2.689310000  | -1.578106000 |
| O | 2.100892000  | 2.454597000  | 3.251596000  |
| O | 1.062792000  | 1.413009000  | 0.746398000  |
| O | 1.409696000  | -0.122050000 | 2.792778000  |
| O | 0.034541000  | -1.529003000 | 4.580252000  |
| O | -0.029004000 | 1.077215000  | 4.747456000  |
| O | 1.067757000  | -1.543536000 | 0.699641000  |
| O | -1.388407000 | -2.144548000 | 0.684923000  |
| O | -2.060540000 | -2.484932000 | -1.942663000 |
| O | -0.006742000 | -3.951663000 | -0.727126000 |
| O | -3.591691000 | -1.421171000 | -0.692989000 |
| O | -0.011759000 | 3.786909000  | 2.204170000  |
| O | 0.035727000  | 3.950749000  | -0.405015000 |
| O | -1.397467000 | 2.000013000  | 0.785822000  |
| O | -2.048750000 | 2.240283000  | 3.470588000  |
| O | -2.064878000 | 2.489801000  | -1.765950000 |
| O | 1.376177000  | -0.018236000 | -1.334907000 |
| O | -1.098491000 | -0.043303000 | -0.795781000 |
| H | 1.849706000  | -0.062139000 | -2.185806000 |
| O | 0.112778000  | 1.815052000  | -3.190311000 |

|    |              |              |              |
|----|--------------|--------------|--------------|
| H  | 0.980299000  | 2.168225000  | -3.428458000 |
| Zr | 2.518230000  | -0.073768000 | 0.696902000  |
| Zr | -0.016517000 | -1.879536000 | 2.504042000  |
| Zr | 0.029920000  | 1.710844000  | 2.530813000  |
| Zr | -0.039781000 | 1.721152000  | -1.052425000 |
| Zr | -2.538005000 | -0.073043000 | 0.716266000  |
| Zr | 0.015234000  | -1.864290000 | -1.082363000 |
| C  | -1.811399000 | -1.594926000 | -5.318712000 |
| C  | -0.449540000 | -2.296566000 | -5.328780000 |
| C  | 0.439457000  | -1.454999000 | -4.418848000 |
| C  | -1.555226000 | -0.091033000 | -5.430049000 |
| C  | 1.902113000  | -1.326982000 | -4.756207000 |
| C  | -2.490915000 | 0.730376000  | -4.564848000 |
| H  | 2.324322000  | -2.339413000 | -4.604762000 |
| H  | -0.044850000 | -2.334279000 | -6.356000000 |
| H  | -2.249604000 | -1.804788000 | -4.327409000 |
| H  | -1.611125000 | 2.361075000  | -4.064558000 |
| H  | 2.022580000  | -1.062448000 | -5.820109000 |
| H  | 3.471628000  | -0.499194000 | -3.947358000 |
| H  | -2.376444000 | 0.390988000  | -3.512822000 |
| H  | -3.522121000 | 0.471964000  | -4.863615000 |
| H  | -0.826275000 | -3.563107000 | -3.938175000 |
| H  | -0.082656000 | 0.803316000  | -4.276937000 |
| H  | -2.375784000 | -1.948214000 | -7.132488000 |
| H  | -1.649454000 | 0.229901000  | -6.483806000 |
| O  | -2.733597000 | -2.083909000 | -6.246660000 |
| O  | 2.514624000  | -0.379592000 | -3.910268000 |
| O  | -2.301039000 | 2.103138000  | -4.701827000 |
| O  | 0.099481000  | -1.512269000 | -3.203308000 |
| O  | -0.500329000 | -3.612182000 | -4.853027000 |
| O  | -0.174822000 | 0.117691000  | -5.060363000 |

## Zr-NU-1000 Int2

|   |              |              |              |
|---|--------------|--------------|--------------|
| C | -3.248200000 | -2.182800000 | -1.650100000 |
| C | -3.229700000 | -2.386600000 | 2.900000000  |
| C | -3.232300000 | 2.034300000  | 3.104000000  |
| C | 3.276900000  | 2.142000000  | 2.939200000  |
| C | 3.226900000  | 2.366300000  | -1.338700000 |
| C | 3.259300000  | -2.277900000 | -1.561500000 |
| C | -3.265300000 | 2.236100000  | -1.457300000 |
| C | 3.257200000  | -2.506600000 | 2.716400000  |
| H | 4.086473000  | 2.683595000  | 3.476544000  |
| H | 4.062342000  | -3.150402000 | 3.135928000  |
| H | -4.029918000 | 2.547625000  | 3.685478000  |
| H | -4.031429000 | -2.990836000 | 3.378986000  |
| C | 5.670551000  | -2.548390000 | -2.196440000 |

|   |              |              |              |
|---|--------------|--------------|--------------|
| C | -5.641870000 | -2.329137000 | -2.374992000 |
| C | 4.330155000  | -2.905315000 | -2.388999000 |
| C | -4.317183000 | -2.766191000 | -2.507795000 |
| C | 3.999661000  | -3.843557000 | -3.376979000 |
| C | -3.998350000 | -3.724737000 | -3.477956000 |
| C | 4.997734000  | -4.415609000 | -4.160890000 |
| C | -4.990553000 | -4.233989000 | -4.310266000 |
| C | 6.332118000  | -4.056378000 | -3.963050000 |
| C | -6.306616000 | -3.789777000 | -4.179122000 |
| C | 6.666771000  | -3.123154000 | -2.980804000 |
| C | -6.631584000 | -2.838269000 | -3.210382000 |
| C | 5.647570000  | 2.939610000  | -1.636531000 |
| C | -5.683579000 | 2.800903000  | -1.755686000 |
| C | 4.305837000  | 3.199981000  | -1.943454000 |
| C | -4.340727000 | 3.089667000  | -2.029299000 |
| C | 3.991052000  | 4.245822000  | -2.820445000 |
| C | -4.020553000 | 4.191563000  | -2.832153000 |
| C | 5.002067000  | 5.020405000  | -3.381926000 |
| C | -5.029582000 | 4.993841000  | -3.353933000 |
| C | 6.336556000  | 4.757148000  | -3.069671000 |
| C | -6.366584000 | 4.698404000  | -3.082455000 |
| C | 6.657387000  | 3.716724000  | -2.196537000 |
| C | -6.692212000 | 3.601376000  | -2.283829000 |
| H | 5.910776000  | -1.814554000 | -1.424963000 |
| H | -5.872479000 | -1.580305000 | -1.614623000 |
| H | 2.950373000  | -4.113640000 | -3.521714000 |
| H | -2.962417000 | -4.061018000 | -3.565845000 |
| H | 4.735508000  | -5.146233000 | -4.929450000 |
| H | -4.735314000 | -4.974832000 | -5.071095000 |
| H | 7.711097000  | -2.841979000 | -2.827531000 |
| H | -7.662265000 | -2.490674000 | -3.109762000 |
| H | 5.877689000  | 2.120966000  | -0.952251000 |
| H | -5.917501000 | 1.941436000  | -1.124751000 |
| H | 2.943224000  | 4.439247000  | -3.059199000 |
| H | -2.970611000 | 4.407306000  | -3.039310000 |
| H | 4.750585000  | 5.832752000  | -4.067546000 |
| H | -4.775095000 | 5.852810000  | -3.978708000 |
| H | 7.701997000  | 3.510936000  | -1.952339000 |
| H | -7.738600000 | 3.370843000  | -2.071449000 |
| H | -7.084307000 | -4.186391000 | -4.836423000 |
| H | 7.115203000  | -4.506161000 | -4.578240000 |
| H | -7.158960000 | 5.327302000  | -3.495601000 |
| H | 7.130264000  | 5.365594000  | -3.509817000 |
| H | -1.936067000 | -2.941841000 | 0.601349000  |
| H | -0.878291000 | 1.370185000  | 5.094235000  |
| H | -0.012734000 | 0.071653000  | 4.797209000  |



|    |              |              |              |
|----|--------------|--------------|--------------|
| H  | 0.008552000  | 3.996663000  | 0.560769000  |
| H  | 0.671775000  | 4.282686000  | 2.612489000  |
| H  | 0.928262000  | 4.230304000  | -0.699216000 |
| H  | 1.964861000  | -0.174089000 | 3.570726000  |
| H  | -1.944098000 | 2.781941000  | 0.794329000  |
| H  | -0.636358000 | -1.994167000 | 5.084426000  |
| H  | 0.896590000  | -4.456812000 | 2.183882000  |
| H  | 0.692025000  | -4.451001000 | -1.148013000 |
| H  | 0.030858000  | -4.172723000 | 0.883712000  |
| O  | -1.058848000 | -0.100080000 | 2.170369000  |
| O  | -3.620545000 | 1.292972000  | 2.165013000  |
| O  | -3.611817000 | 1.327860000  | -0.646679000 |
| O  | -3.612122000 | -1.506967000 | 2.088866000  |
| O  | -2.051179000 | -2.651643000 | 3.242689000  |
| O  | 0.040422000  | -4.106101000 | 1.901962000  |
| O  | 2.076244000  | -2.835612000 | 2.990242000  |
| O  | 2.068923000  | -2.633295000 | -1.787341000 |
| O  | 3.635695000  | -1.528396000 | 2.026305000  |
| O  | 3.613887000  | -1.423487000 | -0.699440000 |
| O  | 3.646379000  | 1.281311000  | 2.104153000  |
| O  | 3.584219000  | 1.389901000  | -0.620980000 |
| O  | 2.026490000  | 2.684686000  | -1.582514000 |
| O  | 2.097901000  | 2.462286000  | 3.236668000  |
| O  | 1.059699000  | 1.403334000  | 0.731567000  |
| O  | 1.407835000  | -0.120626000 | 2.784206000  |
| O  | 0.033599000  | -1.519275000 | 4.578576000  |
| O  | -0.026849000 | 1.088119000  | 4.732410000  |
| O  | 1.061528000  | -1.550703000 | 0.695711000  |
| O  | -1.388162000 | -2.151242000 | 0.682025000  |
| O  | -2.050068000 | -2.446587000 | -1.939586000 |
| O  | -0.000753000 | -3.959260000 | -0.691440000 |
| O  | -3.615161000 | -1.426742000 | -0.696935000 |
| O  | -0.018334000 | 3.784648000  | 2.158476000  |
| O  | 0.040100000  | 3.933426000  | -0.454064000 |
| O  | -1.396572000 | 1.987897000  | 0.757156000  |
| O  | -2.047035000 | 2.249555000  | 3.459574000  |
| O  | -2.066166000 | 2.471681000  | -1.798438000 |
| O  | 1.370100000  | -0.043110000 | -1.345425000 |
| O  | -1.090909000 | -0.062099000 | -0.811499000 |
| H  | 1.909160000  | -0.066882000 | -2.162008000 |
| O  | 0.119712000  | 1.720501000  | -3.239878000 |
| H  | 0.357124000  | 2.599660000  | -3.561399000 |
| Zr | 2.523384000  | -0.077395000 | 0.692306000  |
| Zr | -0.015357000 | -1.880561000 | 2.505506000  |
| Zr | 0.031073000  | 1.713333000  | 2.512783000  |
| Zr | -0.027974000 | 1.694000000  | -1.078550000 |

|    |              |              |              |
|----|--------------|--------------|--------------|
| Zr | -2.534955000 | -0.081841000 | 0.709257000  |
| Zr | 0.023745000  | -1.888232000 | -1.081316000 |
| C  | -1.685052000 | -1.823686000 | -5.376521000 |
| C  | -0.218863000 | -2.237794000 | -5.552112000 |
| C  | 0.576451000  | -1.535063000 | -4.471157000 |
| C  | -1.833957000 | -0.299459000 | -5.470756000 |
| C  | 1.897511000  | -0.895940000 | -4.788864000 |
| C  | -2.740889000 | 0.242215000  | -4.378947000 |
| H  | 2.649715000  | -1.706712000 | -4.731326000 |
| H  | 0.146996000  | -1.912906000 | -6.549016000 |
| H  | -1.973131000 | -2.165526000 | -4.367442000 |
| H  | -2.272495000 | 2.020890000  | -3.789368000 |
| H  | 1.887448000  | -0.556311000 | -5.838681000 |
| H  | 1.528149000  | 0.762424000  | -3.821506000 |
| H  | -2.337529000 | -0.079229000 | -3.396029000 |
| H  | -3.735748000 | -0.229310000 | -4.480844000 |
| H  | -0.919297000 | -4.004057000 | -5.717754000 |
| H  | -0.482059000 | 0.891947000  | -4.618865000 |
| H  | -2.396616000 | -2.192301000 | -7.144493000 |
| H  | -2.269148000 | -0.042177000 | -6.458190000 |
| O  | -2.503305000 | -2.559000000 | -6.256680000 |
| O  | 2.270028000  | 0.110476000  | -3.900297000 |
| O  | -2.864093000 | 1.633650000  | -4.453496000 |
| O  | 0.154793000  | -1.604976000 | -3.317313000 |
| O  | -0.090610000 | -3.624557000 | -5.386371000 |
| O  | -0.546319000 | 0.285238000  | -5.400430000 |

## Zr-NU-1000 Int2\_Ro

|   |              |              |              |
|---|--------------|--------------|--------------|
| C | -3.248176000 | -2.182749000 | -1.650145000 |
| C | -3.229671000 | -2.386628000 | 2.900039000  |
| C | -3.232271000 | 2.034303000  | 3.103989000  |
| C | 3.276917000  | 2.141961000  | 2.939201000  |
| C | 3.226788000  | 2.366226000  | -1.338730000 |
| C | 3.259299000  | -2.277814000 | -1.561550000 |
| C | -3.265239000 | 2.236079000  | -1.457301000 |
| C | 3.257152000  | -2.506579000 | 2.716496000  |
| H | 4.087163000  | 2.695084000  | 3.464290000  |
| H | 4.060406000  | -3.142401000 | 3.152081000  |
| H | -4.030004000 | 2.554448000  | 3.680470000  |
| H | -4.031273000 | -2.974434000 | 3.399735000  |
| C | 5.682419000  | -2.678181000 | -2.065735000 |
| C | -5.657169000 | -2.583982000 | -2.231027000 |
| C | 4.336849000  | -2.945069000 | -2.348005000 |
| C | -4.313708000 | -2.963279000 | -2.344056000 |
| C | 4.011049000  | -3.831540000 | -3.383190000 |
| C | -3.968979000 | -4.076514000 | -3.122646000 |

|   |              |              |              |
|---|--------------|--------------|--------------|
| C | 5.017908000  | -4.442900000 | -4.125034000 |
| C | -4.957800000 | -4.799509000 | -3.782566000 |
| C | 6.357178000  | -4.175136000 | -3.836714000 |
| C | -6.294502000 | -4.408657000 | -3.679527000 |
| C | 6.687603000  | -3.293027000 | -2.806887000 |
| C | -6.642963000 | -3.300854000 | -2.905113000 |
| C | 5.640278000  | 2.937311000  | -1.711626000 |
| C | -5.691128000 | 2.794730000  | -1.802658000 |
| C | 4.291564000  | 3.163741000  | -2.012686000 |
| C | -4.346622000 | 3.026341000  | -2.125330000 |
| C | 3.948372000  | 4.137231000  | -2.959362000 |
| C | -4.025110000 | 3.978887000  | -3.100494000 |
| C | 4.941975000  | 4.877498000  | -3.593763000 |
| C | -5.035307000 | 4.678557000  | -3.756951000 |
| C | 6.284319000  | 4.653633000  | -3.283635000 |
| C | -6.372907000 | 4.435145000  | -3.440922000 |
| C | 6.631876000  | 3.683532000  | -2.342219000 |
| C | -6.699409000 | 3.495481000  | -2.460450000 |
| H | 5.919144000  | -1.982268000 | -1.258789000 |
| H | -5.904917000 | -1.715739000 | -1.617040000 |
| H | 2.957978000  | -4.029781000 | -3.595970000 |
| H | -2.915319000 | -4.355545000 | -3.198440000 |
| H | 4.759339000  | -5.132987000 | -4.931511000 |
| H | -4.687299000 | -5.669463000 | -4.385107000 |
| H | 7.735874000  | -3.083131000 | -2.582610000 |
| H | -7.689291000 | -2.997281000 | -2.825193000 |
| H | 5.890374000  | 2.170191000  | -0.976308000 |
| H | -5.922440000 | 2.050782000  | -1.037137000 |
| H | 2.893166000  | 4.291637000  | -3.195262000 |
| H | -2.971905000 | 4.156600000  | -3.329748000 |
| H | 4.671035000  | 5.631987000  | -4.335985000 |
| H | -4.780375000 | 5.420916000  | -4.516839000 |
| H | 7.682820000  | 3.507787000  | -2.101258000 |
| H | -7.745977000 | 3.310622000  | -2.207758000 |
| H | -7.069317000 | -4.972024000 | -4.205176000 |
| H | 7.147351000  | -4.656212000 | -4.418319000 |
| H | -7.164685000 | 4.983410000  | -3.956879000 |
| H | 7.063914000  | 5.236637000  | -3.780183000 |
| H | -1.932222000 | -2.935627000 | 0.570539000  |
| H | -0.888348000 | 1.338031000  | 5.092578000  |
| H | -0.016218000 | 0.045527000  | 4.791744000  |
| H | 0.018532000  | 4.027136000  | 0.604364000  |
| H | 0.689916000  | 4.267964000  | 2.659625000  |
| H | 0.874817000  | 4.313790000  | -0.697002000 |
| H | 1.962115000  | -0.197761000 | 3.570209000  |
| H | -1.943413000 | 2.799639000  | 0.832176000  |

|    |              |              |              |
|----|--------------|--------------|--------------|
| H  | -0.634471000 | -2.026838000 | 5.058311000  |
| H  | 0.903661000  | -4.447212000 | 2.104513000  |
| H  | 0.695938000  | -4.385943000 | -1.213958000 |
| H  | 0.029360000  | -4.144801000 | 0.814532000  |
| O  | -1.062827000 | -0.103918000 | 2.172380000  |
| O  | -3.623079000 | 1.293268000  | 2.166297000  |
| O  | -3.628908000 | 1.382160000  | -0.600600000 |
| O  | -3.612716000 | -1.511335000 | 2.083993000  |
| O  | -2.048713000 | -2.666793000 | 3.222875000  |
| O  | 0.042298000  | -4.100242000 | 1.833562000  |
| O  | 2.073815000  | -2.849875000 | 2.965070000  |
| O  | 2.062609000  | -2.580580000 | -1.839987000 |
| O  | 3.637701000  | -1.524395000 | 2.034135000  |
| O  | 3.612508000  | -1.441666000 | -0.683366000 |
| O  | 3.647711000  | 1.283214000  | 2.103747000  |
| O  | 3.598987000  | 1.391412000  | -0.621630000 |
| O  | 2.028021000  | 2.710981000  | -1.526570000 |
| O  | 2.099471000  | 2.449313000  | 3.254263000  |
| O  | 1.067099000  | 1.409402000  | 0.753531000  |
| O  | 1.408234000  | -0.133434000 | 2.782363000  |
| O  | 0.035742000  | -1.544902000 | 4.559625000  |
| O  | -0.031880000 | 1.062479000  | 4.737852000  |
| O  | 1.057721000  | -1.542749000 | 0.673978000  |
| O  | -1.397003000 | -2.136130000 | 0.647907000  |
| O  | -2.053445000 | -2.383106000 | -1.996109000 |
| O  | -0.012709000 | -3.910678000 | -0.764322000 |
| O  | -3.622548000 | -1.380019000 | -0.739772000 |
| O  | -0.009065000 | 3.786432000  | 2.201488000  |
| O  | 0.013013000  | 3.979421000  | -0.410719000 |
| O  | -1.395064000 | 2.007784000  | 0.773641000  |
| O  | -2.048884000 | 2.242896000  | 3.466716000  |
| O  | -2.077597000 | 2.474021000  | -1.806468000 |
| O  | 1.381955000  | -0.005692000 | -1.337728000 |
| O  | -1.090867000 | -0.026659000 | -0.797501000 |
| H  | 1.901379000  | 0.000844000  | -2.167734000 |
| O  | 0.145571000  | 1.767840000  | -3.140987000 |
| H  | -0.616025000 | 1.817939000  | -3.728442000 |
| Zr | 2.526240000  | -0.066083000 | 0.690179000  |
| Zr | -0.016588000 | -1.884386000 | 2.480826000  |
| Zr | 0.036906000  | 1.707800000  | 2.521554000  |
| Zr | -0.026729000 | 1.755465000  | -1.065906000 |
| Zr | -2.530637000 | -0.068200000 | 0.704568000  |
| Zr | 0.023709000  | -1.825922000 | -1.110943000 |
| C  | -1.564461000 | -0.396429000 | -5.858298000 |
| C  | -0.472429000 | -1.479519000 | -5.693084000 |
| C  | 0.432515000  | -1.096279000 | -4.529426000 |

|   |              |              |              |
|---|--------------|--------------|--------------|
| C | -2.613317000 | -0.448608000 | -4.749066000 |
| C | 1.696172000  | -0.360050000 | -4.875041000 |
| C | -3.533475000 | 0.755567000  | -4.722301000 |
| H | 2.409695000  | -1.162156000 | -5.155072000 |
| H | 0.145770000  | -1.445345000 | -6.610096000 |
| H | -2.087899000 | -0.615121000 | -6.809289000 |
| H | -5.109831000 | 1.186852000  | -3.649000000 |
| H | 1.510487000  | 0.200321000  | -5.811832000 |
| H | 1.544691000  | 1.114443000  | -3.678025000 |
| H | -3.940180000 | 0.950289000  | -5.738430000 |
| H | -2.970552000 | 1.653735000  | -4.400845000 |
| H | -1.865263000 | -2.706955000 | -5.139651000 |
| H | -4.101135000 | -1.635501000 | -4.366739000 |
| H | -1.462731000 | 1.479350000  | -6.393705000 |
| H | -2.120704000 | -0.507108000 | -3.755010000 |
| O | -0.911993000 | 0.858536000  | -5.905147000 |
| O | 2.245521000  | 0.423961000  | -3.879995000 |
| O | -4.548918000 | 0.419342000  | -3.814093000 |
| O | 0.123422000  | -1.426144000 | -3.393557000 |
| O | -0.985676000 | -2.760711000 | -5.557120000 |
| O | -3.364599000 | -1.620803000 | -4.997375000 |

## Zr-NU-1000 TS3

|   |              |              |              |
|---|--------------|--------------|--------------|
| C | -3.248200000 | -2.182800000 | -1.650100000 |
| C | -3.229700000 | -2.386600000 | 2.900000000  |
| C | -3.232300000 | 2.034300000  | 3.104000000  |
| C | 3.276900000  | 2.142000000  | 2.939200000  |
| C | 3.226900000  | 2.366300000  | -1.338700000 |
| C | 3.259300000  | -2.277900000 | -1.561500000 |
| C | -3.265300000 | 2.236100000  | -1.457300000 |
| C | 3.257200000  | -2.506600000 | 2.716400000  |
| H | 4.089589000  | 2.712016000  | 3.442352000  |
| H | 4.061170000  | -3.145046000 | 3.146287000  |
| H | -4.029875000 | 2.578686000  | 3.657470000  |
| H | -4.032617000 | -2.988355000 | 3.380567000  |
| C | 5.678716000  | -2.605799000 | -2.141443000 |
| C | -5.465109000 | -1.783270000 | -2.719298000 |
| C | 4.333982000  | -2.923704000 | -2.369222000 |
| C | -4.337546000 | -2.603195000 | -2.575613000 |
| C | 4.002730000  | -3.848340000 | -3.368559000 |
| C | -4.220499000 | -3.760636000 | -3.353173000 |
| C | 5.003279000  | -4.447302000 | -4.128450000 |
| C | -5.218199000 | -4.091753000 | -4.266266000 |
| C | 6.342037000  | -4.128758000 | -3.894354000 |
| C | -6.325077000 | -3.257798000 | -4.425417000 |
| C | 6.678010000  | -3.207991000 | -2.900868000 |

|   |              |              |              |
|---|--------------|--------------|--------------|
| C | -6.446637000 | -2.101957000 | -3.652211000 |
| C | 5.633365000  | 2.983885000  | -1.646345000 |
| C | -5.650196000 | 2.347632000  | -2.222237000 |
| C | 4.287002000  | 3.208409000  | -1.961567000 |
| C | -4.325005000 | 2.781126000  | -2.356663000 |
| C | 3.950100000  | 4.227276000  | -2.861821000 |
| C | -3.993328000 | 3.672183000  | -3.384694000 |
| C | 4.945222000  | 5.011804000  | -3.437511000 |
| C | -4.970497000 | 4.117700000  | -4.270882000 |
| C | 6.284463000  | 4.785527000  | -3.116453000 |
| C | -6.287375000 | 3.672949000  | -4.138763000 |
| C | 6.626793000  | 3.771363000  | -2.220782000 |
| C | -6.626206000 | 2.789500000  | -3.111950000 |
| H | 5.920280000  | -1.881298000 | -1.361574000 |
| H | -5.538087000 | -0.884704000 | -2.102317000 |
| H | 2.949583000  | -4.082259000 | -3.540877000 |
| H | -3.342211000 | -4.398649000 | -3.236872000 |
| H | 4.740385000  | -5.166401000 | -4.907673000 |
| H | -5.125219000 | -4.999117000 | -4.866932000 |
| H | 7.725844000  | -2.958337000 | -2.719139000 |
| H | -7.309255000 | -1.443482000 | -3.783437000 |
| H | 5.879948000  | 2.184449000  | -0.945190000 |
| H | -5.894306000 | 1.657839000  | -1.412114000 |
| H | 2.898436000  | 4.387571000  | -3.107363000 |
| H | -2.958171000 | 4.008369000  | -3.474783000 |
| H | 4.677999000  | 5.802744000  | -4.141987000 |
| H | -4.706899000 | 4.815845000  | -5.068890000 |
| H | 7.675227000  | 3.594043000  | -1.970830000 |
| H | -7.658641000 | 2.449162000  | -3.001216000 |
| H | -7.095512000 | -3.507589000 | -5.158759000 |
| H | 7.127399000  | -4.599907000 | -4.490437000 |
| H | -7.054525000 | 4.024693000  | -4.833326000 |
| H | 7.065507000  | 5.401931000  | -3.568075000 |
| H | -1.927081000 | -2.926909000 | 0.600488000  |
| H | -0.891911000 | 1.306518000  | 5.145855000  |
| H | -0.018206000 | 0.014427000  | 4.823933000  |
| H | 0.056902000  | 4.021554000  | 0.673953000  |
| H | 0.694796000  | 4.252283000  | 2.722162000  |
| H | 0.991849000  | 4.250136000  | -0.583914000 |
| H | 1.968504000  | -0.202522000 | 3.598978000  |
| H | -1.917944000 | 2.803595000  | 0.838711000  |
| H | -0.643060000 | -2.036010000 | 5.066796000  |
| H | 0.886356000  | -4.474154000 | 2.167813000  |
| H | 0.750551000  | -4.405825000 | -1.124544000 |
| H | 0.040885000  | -4.156840000 | 0.854474000  |
| O | -1.056160000 | -0.102208000 | 2.195905000  |

|    |              |              |              |
|----|--------------|--------------|--------------|
| O  | -3.620654000 | 1.289567000  | 2.170548000  |
| O  | -3.622893000 | 1.388038000  | -0.589436000 |
| O  | -3.614023000 | -1.502988000 | 2.093099000  |
| O  | -2.051797000 | -2.657694000 | 3.235388000  |
| O  | 0.040324000  | -4.104713000 | 1.880770000  |
| O  | 2.076936000  | -2.840173000 | 2.979407000  |
| O  | 2.073269000  | -2.634677000 | -1.772168000 |
| O  | 3.642545000  | -1.530524000 | 2.025803000  |
| O  | 3.618956000  | -1.403819000 | -0.713532000 |
| O  | 3.643646000  | 1.278880000  | 2.107822000  |
| O  | 3.594492000  | 1.415399000  | -0.599245000 |
| O  | 2.013519000  | 2.662014000  | -1.590749000 |
| O  | 2.102496000  | 2.438642000  | 3.277436000  |
| O  | 1.078466000  | 1.409954000  | 0.786383000  |
| O  | 1.414764000  | -0.135878000 | 2.811253000  |
| O  | 0.034019000  | -1.554003000 | 4.577328000  |
| O  | -0.037560000 | 1.036749000  | 4.781589000  |
| O  | 1.070782000  | -1.523249000 | 0.691960000  |
| O  | -1.380355000 | -2.136080000 | 0.684155000  |
| O  | -2.074712000 | -2.562205000 | -1.902948000 |
| O  | 0.024824000  | -3.942887000 | -0.689804000 |
| O  | -3.579053000 | -1.406479000 | -0.701230000 |
| O  | -0.001547000 | 3.774783000  | 2.255512000  |
| O  | 0.098494000  | 3.966496000  | -0.343246000 |
| O  | -1.373342000 | 2.006893000  | 0.833201000  |
| O  | -2.052662000 | 2.223478000  | 3.492801000  |
| O  | -2.069329000 | 2.598293000  | -1.665018000 |
| O  | 1.364888000  | 0.001639000  | -1.352861000 |
| O  | -1.095850000 | -0.018440000 | -0.770811000 |
| H  | 1.829826000  | -0.019825000 | -2.212907000 |
| O  | -0.138998000 | 1.625385000  | -3.210012000 |
| H  | -0.401129000 | 2.488540000  | -3.555735000 |
| Zr | 2.539894000  | -0.091628000 | 0.694477000  |
| Zr | -0.005605000 | -1.889469000 | 2.492347000  |
| Zr | 0.036110000  | 1.692819000  | 2.582464000  |
| Zr | -0.017678000 | 1.727633000  | -0.952006000 |
| Zr | -2.532254000 | -0.076734000 | 0.734037000  |
| Zr | 0.016557000  | -1.867492000 | -1.115129000 |
| C  | -1.926200000 | -0.049887000 | -5.042587000 |
| C  | -0.700823000 | -2.164024000 | -5.279372000 |
| C  | 0.226633000  | -1.537220000 | -4.470589000 |
| C  | -3.113528000 | -0.639323000 | -5.723651000 |
| C  | 1.448103000  | -0.828896000 | -5.003714000 |
| C  | -4.296336000 | 0.313483000  | -5.584671000 |
| H  | 2.250223000  | -1.576624000 | -5.130710000 |
| H  | -0.631996000 | -2.186383000 | -6.368134000 |

|   |              |              |              |
|---|--------------|--------------|--------------|
| H | -1.203734000 | 0.487924000  | -5.688305000 |
| H | -6.066777000 | 0.375954000  | -6.375879000 |
| H | 1.244607000  | -0.437876000 | -6.020794000 |
| H | 1.257647000  | 0.808111000  | -3.960080000 |
| H | -4.013627000 | 1.315648000  | -5.964813000 |
| H | -4.557403000 | 0.419882000  | -4.515261000 |
| H | -1.629248000 | -2.885448000 | -3.784561000 |
| H | -3.652471000 | -1.030433000 | -7.506683000 |
| H | -1.072024000 | 0.912470000  | -3.457739000 |
| H | -3.385738000 | -1.584848000 | -5.206176000 |
| O | -2.007762000 | 0.214037000  | -3.808649000 |
| O | 1.963327000  | 0.154176000  | -4.145196000 |
| O | -5.337305000 | -0.251114000 | -6.346415000 |
| O | 0.056297000  | -1.583917000 | -3.194953000 |
| O | -1.617918000 | -3.001240000 | -4.761186000 |
| O | -2.805709000 | -0.854792000 | -7.074779000 |

## Zr-NU-1000 Int3

|   |              |              |              |
|---|--------------|--------------|--------------|
| C | -3.248200000 | -2.182800000 | -1.650100000 |
| C | -3.229700000 | -2.386600000 | 2.900000000  |
| C | -3.232300000 | 2.034300000  | 3.104000000  |
| C | 3.276900000  | 2.142000000  | 2.939200000  |
| C | 3.226900000  | 2.366300000  | -1.338700000 |
| C | 3.259300000  | -2.277900000 | -1.561500000 |
| C | -3.265300000 | 2.236100000  | -1.457300000 |
| C | 3.257200000  | -2.506600000 | 2.716400000  |
| H | 4.085480000  | 2.699234000  | 3.462379000  |
| H | 4.059313000  | -3.129318000 | 3.171385000  |
| H | -4.027611000 | 2.556527000  | 3.681161000  |
| H | -4.029913000 | -2.973820000 | 3.402210000  |
| C | 5.692313000  | -2.590610000 | -2.095539000 |
| C | -5.669394000 | -2.467693000 | -2.242830000 |
| C | 4.359807000  | -2.972484000 | -2.293840000 |
| C | -4.338038000 | -2.875164000 | -2.396848000 |
| C | 4.066053000  | -4.012419000 | -3.186209000 |
| C | -4.029065000 | -3.916418000 | -3.281042000 |
| C | 5.090517000  | -4.661943000 | -3.868439000 |
| C | -5.039441000 | -4.545182000 | -4.001854000 |
| C | 6.416790000  | -4.276173000 | -3.666251000 |
| C | -6.363006000 | -4.126962000 | -3.856726000 |
| C | 6.715709000  | -3.240074000 | -2.780520000 |
| C | -6.676907000 | -3.086769000 | -2.978872000 |
| C | 5.641554000  | 2.949623000  | -1.643045000 |
| C | -5.659728000 | 2.963201000  | -1.594891000 |
| C | 4.298107000  | 3.209264000  | -1.943366000 |
| C | -4.326564000 | 3.144081000  | -1.987203000 |



|   |              |              |              |
|---|--------------|--------------|--------------|
| C | 3.978505000  | 4.261722000  | -2.810638000 |
| C | -4.003041000 | 4.176386000  | -2.875618000 |
| C | 4.985770000  | 5.043006000  | -3.369494000 |
| C | -5.001090000 | 5.003463000  | -3.384236000 |
| C | 6.321927000  | 4.778740000  | -3.065487000 |
| C | -6.329778000 | 4.808858000  | -3.003455000 |
| C | 6.647792000  | 3.731852000  | -2.202022000 |
| C | -6.657467000 | 3.791384000  | -2.104301000 |
| H | 5.905336000  | -1.779009000 | -1.397648000 |
| H | -5.890304000 | -1.648944000 | -1.556040000 |
| H | 3.022052000  | -4.296653000 | -3.338305000 |
| H | -2.986473000 | -4.220577000 | -3.394817000 |
| H | 4.855840000  | -5.472174000 | -4.562500000 |
| H | -4.793806000 | -5.356613000 | -4.690080000 |
| H | 7.753684000  | -2.937794000 | -2.623799000 |
| H | -7.713393000 | -2.759839000 | -2.867107000 |
| H | 5.875625000  | 2.126125000  | -0.966031000 |
| H | -5.891095000 | 2.158335000  | -0.893877000 |
| H | 2.929428000  | 4.456943000  | -3.042188000 |
| H | -2.958644000 | 4.310912000  | -3.164462000 |
| H | 4.730369000  | 5.861453000  | -4.046380000 |
| H | -4.744156000 | 5.804914000  | -4.080463000 |
| H | 7.693683000  | 3.524877000  | -1.964710000 |
| H | -7.695866000 | 3.648117000  | -1.796112000 |
| H | -7.155100000 | -4.613150000 | -4.431529000 |
| H | 7.221086000  | -4.785482000 | -4.202690000 |
| H | -7.113002000 | 5.457156000  | -3.403450000 |
| H | 7.112914000  | 5.391551000  | -3.504380000 |
| H | -1.939295000 | -2.926874000 | 0.577935000  |
| H | -0.878499000 | 1.303205000  | 5.120826000  |
| H | -0.017026000 | 0.005618000  | 4.776456000  |
| H | 0.022183000  | 4.006673000  | 0.594549000  |
| H | 0.681358000  | 4.262294000  | 2.634833000  |
| H | 0.940888000  | 4.242105000  | -0.670983000 |
| H | 1.959282000  | -0.203236000 | 3.558564000  |
| H | -1.930109000 | 2.808285000  | 0.812829000  |
| H | -0.637167000 | -2.036842000 | 5.017629000  |
| H | 0.894913000  | -4.468265000 | 2.080272000  |
| H | 0.652876000  | -4.432132000 | -1.227524000 |
| H | 0.030604000  | -4.143047000 | 0.777357000  |
| O | -1.058410000 | -0.097033000 | 2.160447000  |
| O | -3.621811000 | 1.299391000  | 2.162145000  |
| O | -3.626739000 | 1.348577000  | -0.636959000 |
| O | -3.618006000 | -1.501826000 | 2.094495000  |
| O | -2.047493000 | -2.671631000 | 3.207076000  |
| O | 0.044169000  | -4.100106000 | 1.805998000  |

|    |              |              |              |
|----|--------------|--------------|--------------|
| O  | 2.073873000  | -2.848346000 | 2.956876000  |
| O  | 2.081751000  | -2.638772000 | -1.792732000 |
| O  | 3.641892000  | -1.535641000 | 2.016793000  |
| O  | 3.606482000  | -1.376518000 | -0.736383000 |
| O  | 3.643402000  | 1.279132000  | 2.108098000  |
| O  | 3.582292000  | 1.421529000  | -0.591297000 |
| O  | 2.016612000  | 2.659213000  | -1.621565000 |
| O  | 2.096234000  | 2.450736000  | 3.253026000  |
| O  | 1.059645000  | 1.422508000  | 0.751540000  |
| O  | 1.408056000  | -0.133002000 | 2.769281000  |
| O  | 0.035070000  | -1.549645000 | 4.526832000  |
| O  | -0.031869000 | 1.031006000  | 4.741447000  |
| O  | 1.062719000  | -1.527502000 | 0.647275000  |
| O  | -1.399909000 | -2.128975000 | 0.638980000  |
| O  | -2.066094000 | -2.411718000 | -2.001603000 |
| O  | -0.023922000 | -3.929219000 | -0.760242000 |
| O  | -3.605069000 | -1.397527000 | -0.715540000 |
| O  | -0.015535000 | 3.776243000  | 2.177677000  |
| O  | 0.051561000  | 3.949506000  | -0.424971000 |
| O  | -1.397359000 | 2.004396000  | 0.773232000  |
| O  | -2.047333000 | 2.237425000  | 3.471656000  |
| O  | -2.067564000 | 2.440804000  | -1.828409000 |
| O  | 1.370572000  | 0.014548000  | -1.367447000 |
| O  | -1.092758000 | -0.025020000 | -0.806182000 |
| H  | 1.902955000  | 0.021021000  | -2.196111000 |
| O  | 0.110456000  | 1.724100000  | -3.356358000 |
| H  | 0.205395000  | 2.615810000  | -3.715264000 |
| Zr | 2.523115000  | -0.097250000 | 0.682081000  |
| Zr | -0.008384000 | -1.894803000 | 2.438063000  |
| Zr | 0.026342000  | 1.699102000  | 2.546996000  |
| Zr | -0.017052000 | 1.694597000  | -0.994968000 |
| Zr | -2.537996000 | -0.089431000 | 0.705972000  |
| Zr | 0.017283000  | -1.856091000 | -1.211482000 |
| C  | -2.374811000 | 0.071954000  | -5.611691000 |
| C  | -0.060544000 | -1.844040000 | -5.532068000 |
| C  | 0.687464000  | -1.515937000 | -4.454088000 |
| C  | -3.487662000 | -0.275241000 | -4.666164000 |
| C  | 2.125430000  | -1.134886000 | -4.582716000 |
| C  | -4.356266000 | 0.959070000  | -4.477795000 |
| H  | 2.788983000  | -1.910069000 | -4.172608000 |
| H  | 0.282601000  | -1.796939000 | -6.565055000 |
| H  | -2.516362000 | -0.288464000 | -6.656231000 |
| H  | -5.972892000 | 1.348590000  | -3.475452000 |
| H  | 2.381936000  | -1.036085000 | -5.652639000 |
| H  | 1.774613000  | 0.717206000  | -4.062900000 |
| H  | -4.734005000 | 1.293543000  | -5.465394000 |

|   |              |              |              |
|---|--------------|--------------|--------------|
| H | -3.732444000 | 1.773641000  | -4.067270000 |
| H | -1.514282000 | -2.275398000 | -4.421801000 |
| H | -5.001012000 | -1.446471000 | -4.633429000 |
| H | -0.609923000 | 1.311838000  | -3.908597000 |
| H | -3.030406000 | -0.519529000 | -3.679161000 |
| O | -1.445109000 | 0.803517000  | -5.316911000 |
| O | 2.457592000  | 0.055574000  | -3.868995000 |
| O | -5.402775000 | 0.584682000  | -3.622424000 |
| O | 0.106722000  | -1.564587000 | -3.259008000 |
| O | -1.361329000 | -2.209814000 | -5.386699000 |
| O | -4.223031000 | -1.334391000 | -5.198358000 |

## Zr-NU-1000 TS4

|   |              |              |              |
|---|--------------|--------------|--------------|
| C | -3.248200000 | -2.182800000 | -1.650100000 |
| C | -3.229700000 | -2.386600000 | 2.900000000  |
| C | -3.232300000 | 2.034300000  | 3.104000000  |
| C | 3.276900000  | 2.142000000  | 2.939200000  |
| C | 3.226900000  | 2.366300000  | -1.338700000 |
| C | 3.259300000  | -2.277900000 | -1.561500000 |
| C | -3.265300000 | 2.236100000  | -1.457300000 |
| C | 3.257200000  | -2.506600000 | 2.716400000  |
| H | 4.086797000  | 2.684442000  | 3.475514000  |
| H | 4.063150000  | -3.142348000 | 3.146970000  |
| H | -4.030922000 | 2.539219000  | 3.691836000  |
| H | -4.031856000 | -2.990546000 | 3.379214000  |
| C | 5.588607000  | -2.270620000 | -2.510403000 |
| C | -5.649589000 | -2.328257000 | -2.341175000 |
| C | 4.282672000  | -2.778598000 | -2.531366000 |
| C | -4.327031000 | -2.761681000 | -2.499764000 |
| C | 3.924105000  | -3.722039000 | -3.503738000 |
| C | -4.019569000 | -3.706174000 | -3.486893000 |
| C | 4.859476000  | -4.151606000 | -4.442074000 |
| C | -5.025798000 | -4.219951000 | -4.299178000 |
| C | 6.159089000  | -3.641935000 | -4.416358000 |
| C | -6.342213000 | -3.783204000 | -4.140868000 |
| C | 6.522173000  | -2.701994000 | -3.450223000 |
| C | -6.652958000 | -2.833706000 | -3.164469000 |
| C | 5.627512000  | 3.061115000  | -1.535851000 |
| C | -5.685490000 | 2.844574000  | -1.625903000 |
| C | 4.292404000  | 3.229066000  | -1.925139000 |
| C | -4.358146000 | 3.090174000  | -1.999775000 |
| C | 3.965244000  | 4.210459000  | -2.869576000 |
| C | -4.064858000 | 4.154415000  | -2.862323000 |
| C | 4.961498000  | 5.014658000  | -3.416198000 |
| C | -5.090117000 | 4.958278000  | -3.350773000 |
| C | 6.289307000  | 4.848002000  | -3.019373000 |

|   |              |              |              |
|---|--------------|--------------|--------------|
| C | -6.413050000 | 4.708692000  | -2.977270000 |
| C | 6.620878000  | 3.871406000  | -2.078744000 |
| C | -6.709080000 | 3.653840000  | -2.112191000 |
| H | 5.850500000  | -1.534300000 | -1.747399000 |
| H | -5.870264000 | -1.576403000 | -1.580651000 |
| H | 2.899423000  | -4.101889000 | -3.509707000 |
| H | -2.982024000 | -4.025667000 | -3.604882000 |
| H | 4.576536000  | -4.888256000 | -5.197682000 |
| H | -4.783973000 | -4.958150000 | -5.066834000 |
| H | 7.539530000  | -2.304712000 | -3.429800000 |
| H | -7.679571000 | -2.478169000 | -3.050360000 |
| H | 5.864715000  | 2.290395000  | -0.799611000 |
| H | -5.895569000 | 2.010120000  | -0.954406000 |
| H | 2.922011000  | 4.320527000  | -3.173021000 |
| H | -3.026926000 | 4.330566000  | -3.147057000 |
| H | 4.703681000  | 5.775272000  | -4.156722000 |
| H | -4.859661000 | 5.784976000  | -4.026398000 |
| H | 7.660225000  | 3.742825000  | -1.767799000 |
| H | -7.743141000 | 3.464024000  | -1.812630000 |
| H | -7.130050000 | -4.181248000 | -4.785211000 |
| H | 6.892363000  | -3.979404000 | -5.152712000 |
| H | -7.215853000 | 5.345211000  | -3.358286000 |
| H | 7.070129000  | 5.482162000  | -3.446326000 |
| H | -1.938195000 | -2.948098000 | 0.622143000  |
| H | -0.880780000 | 1.372480000  | 5.081295000  |
| H | -0.014284000 | 0.072869000  | 4.793096000  |
| H | 0.035320000  | 4.002288000  | 0.561146000  |
| H | 0.680805000  | 4.273959000  | 2.623840000  |
| H | 0.916997000  | 4.250091000  | -0.730736000 |
| H | 1.965325000  | -0.174087000 | 3.575106000  |
| H | -1.926963000 | 2.786098000  | 0.786485000  |
| H | -0.643271000 | -1.991969000 | 5.076290000  |
| H | 0.904834000  | -4.453196000 | 2.174756000  |
| H | 0.641394000  | -4.475547000 | -1.124462000 |
| H | 0.007585000  | -4.179840000 | 0.891030000  |
| O | -1.059037000 | -0.099334000 | 2.177029000  |
| O | -3.618496000 | 1.301867000  | 2.156806000  |
| O | -3.603974000 | 1.296512000  | -0.674124000 |
| O | -3.611073000 | -1.504407000 | 2.091815000  |
| O | -2.050956000 | -2.654890000 | 3.240726000  |
| O | 0.042636000  | -4.105430000 | 1.908724000  |
| O | 2.077241000  | -2.831776000 | 2.995019000  |
| O | 2.110152000  | -2.773304000 | -1.617114000 |
| O | 3.636754000  | -1.541466000 | 2.006918000  |
| O | 3.630326000  | -1.368548000 | -0.759667000 |
| O | 3.646967000  | 1.281091000  | 2.103806000  |

|    |              |              |              |
|----|--------------|--------------|--------------|
| O  | 3.597242000  | 1.387228000  | -0.628469000 |
| O  | 2.024003000  | 2.658563000  | -1.594120000 |
| O  | 2.098625000  | 2.461399000  | 3.238022000  |
| O  | 1.069322000  | 1.391847000  | 0.723594000  |
| O  | 1.413756000  | -0.122354000 | 2.784774000  |
| O  | 0.032510000  | -1.518987000 | 4.576387000  |
| O  | -0.025717000 | 1.089404000  | 4.728565000  |
| O  | 1.063836000  | -1.538893000 | 0.691891000  |
| O  | -1.387364000 | -2.157894000 | 0.682138000  |
| O  | -2.050181000 | -2.403982000 | -1.987575000 |
| O  | -0.061960000 | -3.984482000 | -0.683067000 |
| O  | -3.608290000 | -1.464871000 | -0.671348000 |
| O  | -0.007511000 | 3.780873000  | 2.161876000  |
| O  | 0.045046000  | 3.936275000  | -0.451967000 |
| O  | -1.386138000 | 1.987155000  | 0.752076000  |
| O  | -2.046919000 | 2.250147000  | 3.459413000  |
| O  | -2.074939000 | 2.514401000  | -1.768363000 |
| O  | 1.351183000  | -0.051472000 | -1.414530000 |
| O  | -1.074994000 | -0.075559000 | -0.791685000 |
| H  | 1.942406000  | -0.043926000 | -2.191921000 |
| O  | -0.087001000 | 1.730916000  | -3.239884000 |
| H  | -0.882693000 | 2.210924000  | -3.521950000 |
| Zr | 2.527001000  | -0.079477000 | 0.682602000  |
| Zr | -0.013185000 | -1.877480000 | 2.501972000  |
| Zr | 0.038493000  | 1.708736000  | 2.506792000  |
| Zr | -0.034950000 | 1.703030000  | -1.083316000 |
| Zr | -2.524905000 | -0.084670000 | 0.705202000  |
| Zr | 0.031122000  | -1.916259000 | -1.087015000 |
| C  | -0.559820000 | -0.355898000 | -4.795891000 |
| C  | 0.505577000  | -1.121145000 | -4.289180000 |
| C  | 1.903429000  | -0.910967000 | -4.808224000 |
| H  | 2.285233000  | -1.897955000 | -5.126114000 |
| H  | -0.505199000 | 0.038023000  | -5.818766000 |
| H  | 1.882082000  | -0.257151000 | -5.697470000 |
| H  | 3.625669000  | -0.669589000 | -3.889057000 |
| H  | -1.779928000 | -1.365278000 | -3.701390000 |
| H  | -0.168536000 | 0.665100000  | -4.075036000 |
| O  | 2.717756000  | -0.355431000 | -3.793599000 |
| O  | 0.303319000  | -1.863237000 | -3.284658000 |
| O  | -1.832548000 | -0.686273000 | -4.403065000 |
| C  | -3.432204000 | 1.088606000  | -5.361292000 |
| C  | -4.593815000 | 0.448866000  | -4.641761000 |
| C  | -5.818969000 | 1.342206000  | -4.696147000 |
| H  | -3.142023000 | 0.552903000  | -6.303932000 |
| H  | -7.596765000 | 1.261884000  | -3.925856000 |
| H  | -6.136916000 | 1.449858000  | -5.752680000 |

|   |              |              |              |
|---|--------------|--------------|--------------|
| H | -5.562061000 | 2.347633000  | -4.317448000 |
| H | -5.595510000 | -1.183915000 | -4.768745000 |
| H | -4.299140000 | 0.352284000  | -3.572592000 |
| O | -2.881220000 | 2.098603000  | -4.996360000 |
| O | -6.810436000 | 0.707166000  | -3.920896000 |
| O | -4.840833000 | -0.795680000 | -5.232170000 |

## Zr-NU-1000 Prod

|   |              |              |              |
|---|--------------|--------------|--------------|
| C | -3.248200000 | -2.182800000 | -1.650100000 |
| C | -3.229700000 | -2.386600000 | 2.900000000  |
| C | -3.232300000 | 2.034300000  | 3.104000000  |
| C | 3.276900000  | 2.142000000  | 2.939200000  |
| C | 3.226900000  | 2.366300000  | -1.338700000 |
| C | 3.259300000  | -2.277900000 | -1.561500000 |
| C | -3.265300000 | 2.236100000  | -1.457300000 |
| C | 3.257200000  | -2.506600000 | 2.716400000  |
| H | 4.086614000  | 2.691347000  | 3.468847000  |
| H | 4.061235000  | -3.149605000 | 3.139871000  |
| H | -4.030156000 | 2.549125000  | 3.684797000  |
| H | -4.031462000 | -2.985331000 | 3.386063000  |
| C | 5.673102000  | -2.555100000 | -2.181099000 |
| C | -5.652425000 | -2.451481000 | -2.303038000 |
| C | 4.337772000  | -2.940539000 | -2.352661000 |
| C | -4.324519000 | -2.887909000 | -2.402963000 |
| C | 4.024006000  | -3.941959000 | -3.281211000 |
| C | -4.015921000 | -3.979038000 | -3.225163000 |
| C | 5.029986000  | -4.548132000 | -4.028310000 |
| C | -5.020295000 | -4.624897000 | -3.940272000 |
| C | 6.358392000  | -4.155276000 | -3.855694000 |
| C | -6.338209000 | -4.177397000 | -3.849444000 |
| C | 6.677753000  | -3.159093000 | -2.932110000 |
| C | -6.652851000 | -3.089425000 | -3.031310000 |
| C | 5.634060000  | 3.001487000  | -1.637609000 |
| C | -5.675821000 | 2.900728000  | -1.698026000 |
| C | 4.290548000  | 3.183771000  | -1.988602000 |
| C | -4.342920000 | 3.039385000  | -2.111519000 |
| C | 3.951652000  | 4.134865000  | -2.959398000 |
| C | -4.031708000 | 3.912097000  | -3.161866000 |
| C | 4.944903000  | 4.896111000  | -3.569009000 |
| C | -5.042837000 | 4.624019000  | -3.802463000 |
| C | 6.281463000  | 4.717060000  | -3.208818000 |
| C | -6.368955000 | 4.477480000  | -3.392127000 |
| C | 6.624589000  | 3.769880000  | -2.242665000 |
| C | -6.683943000 | 3.619134000  | -2.336572000 |
| H | 5.902194000  | -1.774051000 | -1.453922000 |
| H | -5.874988000 | -1.595878000 | -1.663895000 |

|   |              |              |              |
|---|--------------|--------------|--------------|
| H | 2.980001000  | -4.241229000 | -3.399577000 |
| H | -2.982241000 | -4.323090000 | -3.290466000 |
| H | 4.780894000  | -5.332800000 | -4.746526000 |
| H | -4.772389000 | -5.475692000 | -4.578128000 |
| H | 7.717327000  | -2.852112000 | -2.797633000 |
| H | -7.685516000 | -2.739903000 | -2.959979000 |
| H | 5.880983000  | 2.252148000  | -0.882983000 |
| H | -5.899776000 | 2.216369000  | -0.876574000 |
| H | 2.901498000  | 4.253859000  | -3.234526000 |
| H | -2.987915000 | 4.013027000  | -3.467035000 |
| H | 4.678014000  | 5.631825000  | -4.331164000 |
| H | -4.797154000 | 5.298138000  | -4.626056000 |
| H | 7.671072000  | 3.629974000  | -1.962056000 |
| H | -7.721042000 | 3.509775000  | -2.011610000 |
| H | -7.125462000 | -4.677798000 | -4.418500000 |
| H | 7.148361000  | -4.629598000 | -4.442900000 |
| H | -7.161147000 | 5.036434000  | -3.895757000 |
| H | 7.060319000  | 5.317250000  | -3.685631000 |
| H | -1.932182000 | -2.936554000 | 0.591916000  |
| H | -0.884306000 | 1.362260000  | 5.093579000  |
| H | -0.014454000 | 0.068000000  | 4.800857000  |
| H | 0.024427000  | 4.023318000  | 0.590024000  |
| H | 0.686782000  | 4.277902000  | 2.649577000  |
| H | 0.870550000  | 4.321981000  | -0.716443000 |
| H | 1.963517000  | -0.183994000 | 3.579832000  |
| H | -1.936356000 | 2.803216000  | 0.826506000  |
| H | -0.634430000 | -2.009910000 | 5.081784000  |
| H | 0.905869000  | -4.445102000 | 2.121839000  |
| H | 0.727302000  | -4.375876000 | -1.179559000 |
| H | 0.026793000  | -4.146312000 | 0.836116000  |
| O | -1.061130000 | -0.099959000 | 2.180164000  |
| O | -3.624088000 | 1.295083000  | 2.165056000  |
| O | -3.629071000 | 1.370466000  | -0.609804000 |
| O | -3.611211000 | -1.506699000 | 2.089155000  |
| O | -2.049769000 | -2.659995000 | 3.234123000  |
| O | 0.044435000  | -4.097183000 | 1.852306000  |
| O | 2.074889000  | -2.842381000 | 2.980277000  |
| O | 2.062723000  | -2.592056000 | -1.833288000 |
| O | 3.636952000  | -1.525233000 | 2.032603000  |
| O | 3.612795000  | -1.438298000 | -0.689222000 |
| O | 3.649966000  | 1.281019000  | 2.106706000  |
| O | 3.601032000  | 1.396584000  | -0.614694000 |
| O | 2.025812000  | 2.690004000  | -1.551155000 |
| O | 2.099653000  | 2.455618000  | 3.245960000  |
| O | 1.068129000  | 1.404768000  | 0.748629000  |
| O | 1.409483000  | -0.125418000 | 2.791629000  |

|    |              |              |              |
|----|--------------|--------------|--------------|
| O  | 0.034293000  | -1.531337000 | 4.577854000  |
| O  | -0.029061000 | 1.082975000  | 4.738690000  |
| O  | 1.067998000  | -1.547326000 | 0.696187000  |
| O  | -1.392201000 | -2.140452000 | 0.670238000  |
| O  | -2.047894000 | -2.401106000 | -1.991753000 |
| O  | -0.011646000 | -3.917862000 | -0.762288000 |
| O  | -3.605445000 | -1.409319000 | -0.713255000 |
| O  | -0.007637000 | 3.790862000  | 2.190356000  |
| O  | 0.018272000  | 3.969869000  | -0.424254000 |
| O  | -1.392678000 | 2.007792000  | 0.770634000  |
| O  | -2.048754000 | 2.246839000  | 3.462419000  |
| O  | -2.075916000 | 2.473365000  | -1.801083000 |
| O  | 1.386447000  | -0.016696000 | -1.331852000 |
| O  | -1.091469000 | -0.031383000 | -0.781817000 |
| H  | 1.884565000  | -0.020306000 | -2.173798000 |
| O  | 0.109539000  | 1.685031000  | -3.158671000 |
| H  | -0.702161000 | 1.659460000  | -3.678337000 |
| Zr | 2.530750000  | -0.060546000 | 0.694996000  |
| Zr | -0.015928000 | -1.877301000 | 2.503780000  |
| Zr | 0.038306000  | 1.714510000  | 2.516130000  |
| Zr | -0.024450000 | 1.748920000  | -1.082564000 |
| Zr | -2.531486000 | -0.063963000 | 0.714025000  |
| Zr | 0.022391000  | -1.822626000 | -1.067643000 |
| C  | 0.136354000  | -2.704651000 | -5.327300000 |
| C  | 0.626600000  | -1.597266000 | -4.442182000 |
| C  | 1.734420000  | -0.696635000 | -4.894951000 |
| H  | 2.590413000  | -1.350818000 | -5.150513000 |
| H  | 0.929178000  | -3.485638000 | -5.282143000 |
| H  | 1.405600000  | -0.262452000 | -5.861180000 |
| H  | 1.363081000  | 0.880647000  | -3.803341000 |
| H  | -1.255488000 | -2.975487000 | -4.005064000 |
| H  | 0.111567000  | -2.372581000 | -6.378271000 |
| O  | 2.131565000  | 0.249828000  | -3.975341000 |
| O  | 0.113876000  | -1.499547000 | -3.334088000 |
| O  | -1.107512000 | -3.185781000 | -4.948310000 |
| C  | -2.208954000 | -0.715240000 | -5.930050000 |
| C  | -3.338839000 | -0.796565000 | -4.948265000 |
| C  | -3.830491000 | 0.568945000  | -4.500332000 |
| H  | -2.343710000 | -1.361338000 | -6.836387000 |
| H  | -5.285309000 | 1.154933000  | -3.345664000 |
| H  | -4.151187000 | 1.160523000  | -5.381056000 |
| H  | -2.998927000 | 1.115143000  | -4.012957000 |
| H  | -5.076841000 | -1.588708000 | -4.864937000 |
| H  | -2.895995000 | -1.291302000 | -4.054619000 |
| O  | -1.222942000 | -0.030272000 | -5.770325000 |
| O  | -4.898211000 | 0.316268000  | -3.625890000 |



O -4.358533000 -1.564926000 -5.513068000

Zr-NU-1000 Int2\_Ro'

C -3.248200000 -2.182800000 -1.650100000

C -3.229700000 -2.386600000 2.900000000

C -3.232300000 2.034300000 3.104000000

C 3.276900000 2.142000000 2.939200000

C 3.226900000 2.366300000 -1.338700000

C 3.259300000 -2.277900000 -1.561500000

C -3.265300000 2.236100000 -1.457300000

C 3.257200000 -2.506600000 2.716400000

H 4.092210000 2.689062000 3.462497000

H 4.065314000 -3.141724000 3.144028000

H -4.029495000 2.568141000 3.668345000

H -4.030860000 -2.991075000 3.380381000

C 5.663862000 -2.438264000 -2.247854000

C -5.602664000 -2.218541000 -2.503637000

C 4.339875000 -2.866833000 -2.408717000

C -4.302026000 -2.736856000 -2.548383000

C 4.039374000 -3.817164000 -3.393854000

C -3.986375000 -3.736626000 -3.478097000

C 5.046776000 -4.329244000 -4.206987000

C -4.958708000 -4.208108000 -4.355512000

C 6.363757000 -3.895926000 -4.042588000

C -6.250064000 -3.678368000 -4.316298000

C 6.670480000 -2.951218000 -3.062261000

C -6.570744000 -2.684111000 -3.390397000

C 5.654432000 2.848370000 -1.761276000

C -5.690642000 2.660029000 -1.961438000

C 4.308241000 3.128456000 -2.029557000

C -4.340930000 2.900517000 -2.247689000

C 3.981496000 4.118079000 -2.965738000

C -3.995549000 3.758548000 -3.299928000

C 4.988405000 4.818444000 -3.624187000

C -4.991976000 4.369435000 -4.056139000

C 6.327912000 4.539973000 -3.347897000

C -6.336196000 4.132262000 -3.763438000

C 6.659586000 3.555624000 -2.415294000

C -6.684478000 3.278481000 -2.715292000

H 5.882550000 -1.697797000 -1.475783000

H -5.831592000 -1.441962000 -1.770849000

H 3.006553000 -4.154495000 -3.510972000

H -2.968451000 -4.132711000 -3.497071000

H 4.807248000 -5.073169000 -4.970214000

H -4.710573000 -4.990643000 -5.076066000

H 7.701201000 -2.614068000 -2.931877000

|   |              |              |              |
|---|--------------|--------------|--------------|
| H | -7.581612000 | -2.271211000 | -3.359567000 |
| H | 5.892030000  | 2.073648000  | -1.029424000 |
| H | -5.941022000 | 1.987677000  | -1.138331000 |
| H | 2.928478000  | 4.319759000  | -3.173660000 |
| H | -2.936611000 | 3.923744000  | -3.510601000 |
| H | 4.729257000  | 5.585519000  | -4.357447000 |
| H | -4.721110000 | 5.035132000  | -4.878963000 |
| H | 7.708338000  | 3.340519000  | -2.197543000 |
| H | -7.736974000 | 3.095789000  | -2.485989000 |
| H | -7.010937000 | -4.044224000 | -5.009996000 |
| H | 7.154353000  | -4.298641000 | -4.680113000 |
| H | -7.117288000 | 4.615560000  | -4.355672000 |
| H | 7.117630000  | 5.092888000  | -3.862424000 |
| H | -1.950118000 | -2.923151000 | 0.597515000  |
| H | -0.883840000 | 1.357770000  | 5.101013000  |
| H | -0.012811000 | 0.064407000  | 4.810033000  |
| H | 0.028524000  | 4.040805000  | 0.647935000  |
| H | 0.689097000  | 4.265665000  | 2.715104000  |
| H | 0.872003000  | 4.352817000  | -0.655440000 |
| H | 1.965778000  | -0.184276000 | 3.577246000  |
| H | -1.953417000 | 2.792145000  | 0.836743000  |
| H | -0.634885000 | -2.011655000 | 5.087424000  |
| H | 0.894542000  | -4.444591000 | 2.154468000  |
| H | 0.738081000  | -4.385728000 | -1.113051000 |
| H | 0.014340000  | -4.151441000 | 0.865044000  |
| O | -1.062135000 | -0.103848000 | 2.182286000  |
| O | -3.624461000 | 1.290663000  | 2.169532000  |
| O | -3.626406000 | 1.343948000  | -0.621976000 |
| O | -3.611010000 | -1.506982000 | 2.090115000  |
| O | -2.050551000 | -2.655852000 | 3.242646000  |
| O | 0.033592000  | -4.097027000 | 1.883355000  |
| O | 2.076680000  | -2.843603000 | 2.982728000  |
| O | 2.070179000  | -2.660107000 | -1.781495000 |
| O | 3.630697000  | -1.528967000 | 2.021279000  |
| O | 3.598623000  | -1.421392000 | -0.707216000 |
| O | 3.643396000  | 1.286483000  | 2.094866000  |
| O | 3.582531000  | 1.356156000  | -0.655096000 |
| O | 2.041971000  | 2.750498000  | -1.496344000 |
| O | 2.103143000  | 2.448110000  | 3.259101000  |
| O | 1.063157000  | 1.404922000  | 0.744534000  |
| O | 1.407689000  | -0.127402000 | 2.791797000  |
| O | 0.035784000  | -1.535459000 | 4.583731000  |
| O | -0.027442000 | 1.078895000  | 4.747987000  |
| O | 1.052483000  | -1.537769000 | 0.684504000  |
| O | -1.396354000 | -2.137436000 | 0.683317000  |
| O | -2.044358000 | -2.448466000 | -1.928466000 |

|    |              |              |              |
|----|--------------|--------------|--------------|
| O  | -0.014734000 | -3.933437000 | -0.715289000 |
| O  | -3.625747000 | -1.438405000 | -0.697865000 |
| O  | -0.008479000 | 3.789282000  | 2.249769000  |
| O  | 0.023341000  | 3.994100000  | -0.363067000 |
| O  | -1.397367000 | 2.003944000  | 0.807816000  |
| O  | -2.051025000 | 2.230747000  | 3.479568000  |
| O  | -2.082374000 | 2.579780000  | -1.679653000 |
| O  | 1.333717000  | -0.025412000 | -1.418399000 |
| O  | -1.107549000 | -0.030184000 | -0.815823000 |
| H  | 1.930864000  | -0.011217000 | -2.184310000 |
| O  | 0.035928000  | 2.028851000  | -3.080360000 |
| H  | 0.820011000  | 2.163791000  | -3.630465000 |
| Zr | 2.505095000  | -0.053228000 | 0.698385000  |
| Zr | -0.023447000 | -1.876058000 | 2.510535000  |
| Zr | 0.030382000  | 1.711934000  | 2.526922000  |
| Zr | -0.042167000 | 1.794049000  | -1.085278000 |
| Zr | -2.534194000 | -0.055159000 | 0.709802000  |
| Zr | -0.010021000 | -1.843675000 | -1.064934000 |
| C  | 0.350959000  | -0.747619000 | -4.381945000 |
| C  | 1.741169000  | -0.592752000 | -4.993616000 |
| C  | 1.887600000  | 0.681940000  | -5.823394000 |
| C  | -0.750753000 | -0.905332000 | -5.411829000 |
| C  | 2.099893000  | 0.539750000  | -7.298795000 |
| C  | -2.105288000 | -1.012971000 | -4.746613000 |
| H  | 3.045666000  | -0.039979000 | -7.412334000 |
| H  | 1.961953000  | -1.475254000 | -5.633010000 |
| H  | 0.143681000  | 0.167634000  | -3.796824000 |
| H  | -3.937049000 | -0.867646000 | -5.377082000 |
| H  | 1.306589000  | -0.116139000 | -7.702272000 |
| H  | 2.122234000  | 2.427484000  | -7.245214000 |
| H  | -2.205610000 | -0.206878000 | -3.990343000 |
| H  | -2.178329000 | -1.977101000 | -4.221475000 |
| H  | 3.547970000  | -0.464408000 | -4.194822000 |
| H  | -1.589421000 | 0.350153000  | -6.593041000 |
| H  | 1.248015000  | -2.231096000 | -3.397811000 |
| H  | -0.575418000 | -1.829799000 | -6.007982000 |
| O  | 0.340980000  | -1.878984000 | -3.491969000 |
| O  | 2.152127000  | 1.755535000  | -7.945975000 |
| O  | -3.060658000 | -0.883733000 | -5.776919000 |
| O  | 1.950607000  | 1.774186000  | -5.295286000 |
| O  | 2.636158000  | -0.555705000 | -3.891065000 |
| O  | -0.694652000 | 0.230823000  | -6.239920000 |

Zr-NU-1000 TS3'

|   |              |              |              |
|---|--------------|--------------|--------------|
| C | -3.248200000 | -2.182800000 | -1.650100000 |
| C | -3.229700000 | -2.386600000 | 2.900000000  |

|   |              |              |              |
|---|--------------|--------------|--------------|
| C | -3.232300000 | 2.034300000  | 3.104000000  |
| C | 3.276900000  | 2.142000000  | 2.939200000  |
| C | 3.226900000  | 2.366300000  | -1.338700000 |
| C | 3.259300000  | -2.277900000 | -1.561500000 |
| C | -3.265300000 | 2.236100000  | -1.457300000 |
| C | 3.257200000  | -2.506600000 | 2.716400000  |
| H | 4.092172000  | 2.702096000  | 3.448505000  |
| H | 4.063260000  | -3.138032000 | 3.152164000  |
| H | -4.030772000 | 2.573540000  | 3.660684000  |
| H | -4.032732000 | -2.974595000 | 3.396382000  |
| C | 5.691472000  | -2.694455000 | -1.998855000 |
| C | -5.649293000 | -2.395040000 | -2.333366000 |
| C | 4.352385000  | -2.987117000 | -2.285518000 |
| C | -4.315293000 | -2.791038000 | -2.490475000 |
| C | 4.048800000  | -3.940002000 | -3.266700000 |
| C | -3.983851000 | -3.744862000 | -3.461813000 |
| C | 5.070829000  | -4.590982000 | -3.951977000 |
| C | -4.977663000 | -4.300238000 | -4.261953000 |
| C | 6.403740000  | -4.295147000 | -3.661304000 |
| C | -6.306002000 | -3.901783000 | -4.101936000 |
| C | 6.712142000  | -3.347450000 | -2.684286000 |
| C | -6.640130000 | -2.948452000 | -3.139099000 |
| C | 5.638117000  | 2.698501000  | -1.944340000 |
| C | -5.669934000 | 2.524486000  | -2.107074000 |
| C | 4.295231000  | 3.061356000  | -2.115908000 |
| C | -4.327712000 | 2.887136000  | -2.272019000 |
| C | 3.962552000  | 4.053945000  | -3.047719000 |
| C | -3.977744000 | 3.837293000  | -3.241027000 |
| C | 4.958076000  | 4.675069000  | -3.796438000 |
| C | -4.962479000 | 4.417820000  | -4.035167000 |
| C | 6.293768000  | 4.314136000  | -3.615048000 |
| C | -6.299629000 | 4.052671000  | -3.867261000 |
| C | 6.632507000  | 3.326822000  | -2.688037000 |
| C | -6.651891000 | 3.106977000  | -2.903212000 |
| H | 5.911131000  | -1.949085000 | -1.232180000 |
| H | -5.887700000 | -1.645149000 | -1.576696000 |
| H | 3.000268000  | -4.162176000 | -3.478550000 |
| H | -2.937284000 | -4.038015000 | -3.571593000 |
| H | 4.830087000  | -5.335524000 | -4.714372000 |
| H | -4.718311000 | -5.046804000 | -5.016083000 |
| H | 7.755406000  | -3.117339000 | -2.456688000 |
| H | -7.679286000 | -2.634126000 | -3.019074000 |
| H | 5.880425000  | 1.919237000  | -1.219253000 |
| H | -5.922425000 | 1.776913000  | -1.352756000 |
| H | 2.913851000  | 4.327847000  | -3.183940000 |
| H | -2.924307000 | 4.103859000  | -3.355981000 |

|   |              |              |              |
|---|--------------|--------------|--------------|
| H | 4.691921000  | 5.442217000  | -4.526623000 |
| H | -4.689075000 | 5.159021000  | -4.789716000 |
| H | 7.678415000  | 3.044877000  | -2.547621000 |
| H | -7.698209000 | 2.820418000  | -2.775933000 |
| H | -7.085225000 | -4.335461000 | -4.733438000 |
| H | 7.205918000  | -4.807194000 | -4.198149000 |
| H | -7.071651000 | 4.507050000  | -4.493034000 |
| H | 7.075105000  | 4.803283000  | -4.201637000 |
| H | -1.944861000 | -2.913167000 | 0.569859000  |
| H | -0.886086000 | 1.321260000  | 5.124291000  |
| H | -0.017811000 | 0.027123000  | 4.809412000  |
| H | 0.022936000  | 4.057784000  | 0.710910000  |
| H | 0.691778000  | 4.254043000  | 2.757091000  |
| H | 0.859240000  | 4.391179000  | -0.595526000 |
| H | 1.964847000  | -0.201201000 | 3.574476000  |
| H | -1.958537000 | 2.800992000  | 0.850171000  |
| H | -0.639660000 | -2.037514000 | 5.058087000  |
| H | 0.890479000  | -4.461301000 | 2.143259000  |
| H | 0.758483000  | -4.389086000 | -1.169396000 |
| H | 0.041178000  | -4.155834000 | 0.835575000  |
| O | -1.058239000 | -0.104643000 | 2.171330000  |
| O | -3.617750000 | 1.290228000  | 2.167647000  |
| O | -3.627057000 | 1.374557000  | -0.598280000 |
| O | -3.607529000 | -1.510335000 | 2.083002000  |
| O | -2.048849000 | -2.666511000 | 3.226790000  |
| O | 0.039763000  | -4.102349000 | 1.855510000  |
| O | 2.075138000  | -2.848504000 | 2.967691000  |
| O | 2.067084000  | -2.576644000 | -1.858362000 |
| O | 3.633447000  | -1.525948000 | 2.026411000  |
| O | 3.594766000  | -1.404987000 | -0.710339000 |
| O | 3.640930000  | 1.285864000  | 2.096085000  |
| O | 3.579644000  | 1.373999000  | -0.638209000 |
| O | 2.043942000  | 2.782708000  | -1.462960000 |
| O | 2.103458000  | 2.436149000  | 3.275711000  |
| O | 1.061128000  | 1.422592000  | 0.765058000  |
| O | 1.406260000  | -0.135638000 | 2.789935000  |
| O | 0.032188000  | -1.554749000 | 4.562125000  |
| O | -0.033250000 | 1.045404000  | 4.760603000  |
| O | 1.057012000  | -1.527439000 | 0.663715000  |
| O | -1.385476000 | -2.131338000 | 0.657338000  |
| O | -2.050041000 | -2.466420000 | -1.916990000 |
| O | 0.033252000  | -3.928118000 | -0.731887000 |
| O | -3.612647000 | -1.392634000 | -0.722827000 |
| O | -0.008647000 | 3.785089000  | 2.288242000  |
| O | 0.016012000  | 4.019049000  | -0.304508000 |
| O | -1.392302000 | 2.020045000  | 0.815734000  |

|    |              |              |              |
|----|--------------|--------------|--------------|
| O  | -2.051859000 | 2.224128000  | 3.489588000  |
| O  | -2.071029000 | 2.548949000  | -1.703397000 |
| O  | 1.335709000  | 0.024372000  | -1.412312000 |
| O  | -1.088790000 | -0.000683000 | -0.829667000 |
| H  | 1.993600000  | -0.005639000 | -2.126283000 |
| O  | 0.102749000  | 2.289082000  | -3.078164000 |
| H  | 0.972846000  | 2.625889000  | -3.328072000 |
| Zr | 2.507825000  | -0.063792000 | 0.701265000  |
| Zr | -0.019517000 | -1.886646000 | 2.483657000  |
| Zr | 0.028398000  | 1.702666000  | 2.555435000  |
| Zr | -0.041804000 | 1.823266000  | -1.018941000 |
| Zr | -2.529379000 | -0.061406000 | 0.700244000  |
| Zr | 0.006663000  | -1.854736000 | -1.117777000 |
| C  | 0.089084000  | -0.479833000 | -4.058561000 |
| C  | 1.909313000  | -0.499208000 | -4.879255000 |
| C  | 1.783346000  | 0.630625000  | -5.874058000 |
| C  | -1.025096000 | -0.062098000 | -4.976511000 |
| C  | 1.185842000  | 0.345293000  | -7.225348000 |
| C  | -2.347116000 | -0.240710000 | -4.208902000 |
| H  | 2.041211000  | 0.076824000  | -7.874157000 |
| H  | 2.187688000  | -1.456079000 | -5.373780000 |
| H  | 0.416882000  | 0.369624000  | -3.444906000 |
| H  | -3.176389000 | 1.246770000  | -5.084753000 |
| H  | 0.583105000  | -0.587250000 | -7.158961000 |
| H  | -0.135482000 | 1.682809000  | -7.124872000 |
| H  | -2.240460000 | 0.185161000  | -3.187962000 |
| H  | -2.544346000 | -1.313021000 | -4.088501000 |
| H  | 2.996393000  | 0.781074000  | -4.044655000 |
| H  | -0.590644000 | 1.800921000  | -4.545462000 |
| H  | 1.016106000  | -1.397288000 | -4.234746000 |
| H  | -1.089946000 | -0.673574000 | -5.892175000 |
| O  | -0.004730000 | -1.688633000 | -3.436207000 |
| O  | 0.521594000  | 1.410085000  | -7.790100000 |
| O  | -3.403913000 | 0.321883000  | -4.918663000 |
| O  | 2.235071000  | 1.706743000  | -5.530406000 |
| O  | 2.778571000  | -0.162730000 | -3.871317000 |
| O  | -0.850637000 | 1.280303000  | -5.363982000 |

## Zr-NU-1000 Prod'

|   |              |              |              |
|---|--------------|--------------|--------------|
| C | -3.248236000 | -2.182785000 | -1.650095000 |
| C | -3.229693000 | -2.386607000 | 2.899996000  |
| C | -3.232298000 | 2.034294000  | 3.103998000  |
| C | 3.276901000  | 2.142002000  | 2.939200000  |
| C | 3.226899000  | 2.366298000  | -1.338699000 |
| C | 3.259313000  | -2.277896000 | -1.561490000 |
| C | -3.265292000 | 2.236093000  | -1.457311000 |

|   |              |              |              |
|---|--------------|--------------|--------------|
| C | 3.257207000  | -2.506598000 | 2.716400000  |
| H | 4.090575000  | 2.694111000  | 3.459741000  |
| H | 4.062286000  | -3.147624000 | 3.140363000  |
| H | -4.028998000 | 2.572142000  | 3.664725000  |
| H | -4.032579000 | -2.980694000 | 3.389619000  |
| C | 5.686984000  | -2.619129000 | -2.074781000 |
| C | -5.657862000 | -2.426034000 | -2.299288000 |
| C | 4.349037000  | -2.942521000 | -2.332007000 |
| C | -4.318336000 | -2.786280000 | -2.492138000 |
| C | 4.043807000  | -3.862618000 | -3.342342000 |
| C | -3.985937000 | -3.706826000 | -3.494570000 |
| C | 5.063095000  | -4.448628000 | -4.088891000 |
| C | -4.982101000 | -4.261159000 | -4.292522000 |
| C | 6.394526000  | -4.119409000 | -3.830559000 |
| C | -6.315633000 | -3.897509000 | -4.097165000 |
| C | 6.704684000  | -3.205091000 | -2.821945000 |
| C | -6.651916000 | -2.979946000 | -3.100999000 |
| C | 5.646267000  | 2.723763000  | -1.901946000 |
| C | -5.679067000 | 2.665389000  | -1.979559000 |
| C | 4.306223000  | 3.106319000  | -2.060918000 |
| C | -4.328128000 | 2.941066000  | -2.223663000 |
| C | 3.987444000  | 4.159897000  | -2.927694000 |
| C | -3.976208000 | 3.865895000  | -3.215757000 |
| C | 4.993699000  | 4.823638000  | -3.621773000 |
| C | -4.965981000 | 4.507857000  | -3.953759000 |
| C | 6.326105000  | 4.438770000  | -3.459509000 |
| C | -6.311594000 | 4.230967000  | -3.705340000 |
| C | 6.651524000  | 3.387706000  | -2.601020000 |
| C | -6.666707000 | 3.310704000  | -2.718089000 |
| H | 5.907165000  | -1.898269000 | -1.284763000 |
| H | -5.899310000 | -1.705864000 | -1.515380000 |
| H | 2.996238000  | -4.104202000 | -3.534965000 |
| H | -2.936302000 | -3.976188000 | -3.630105000 |
| H | 4.820359000  | -5.167183000 | -4.875265000 |
| H | -4.720480000 | -4.980144000 | -5.072268000 |
| H | 7.747220000  | -2.950082000 | -2.617986000 |
| H | -7.695451000 | -2.694121000 | -2.951055000 |
| H | 5.880936000  | 1.904413000  | -1.218307000 |
| H | -5.934358000 | 1.937734000  | -1.206927000 |
| H | 2.939296000  | 4.431227000  | -3.064465000 |
| H | -2.916945000 | 4.066690000  | -3.391841000 |
| H | 4.739145000  | 5.641075000  | -4.299808000 |
| H | -4.690119000 | 5.228563000  | -4.727019000 |
| H | 7.694282000  | 3.089098000  | -2.471796000 |
| H | -7.720060000 | 3.093830000  | -2.526873000 |
| H | -7.097044000 | -4.330902000 | -4.726147000 |

|   |              |              |              |
|---|--------------|--------------|--------------|
| H | 7.194325000  | -4.579359000 | -4.416062000 |
| H | -7.088198000 | 4.734577000  | -4.286137000 |
| H | 7.114884000  | 4.960525000  | -4.006798000 |
| H | -1.935564000 | -2.930861000 | 0.576015000  |
| H | -0.886437000 | 1.335265000  | 5.113534000  |
| H | -0.016332000 | 0.041649000  | 4.808752000  |
| H | 0.012599000  | 4.028109000  | 0.649195000  |
| H | 0.690100000  | 4.259785000  | 2.700831000  |
| H | 0.860388000  | 4.342364000  | -0.650182000 |
| H | 1.963506000  | -0.195534000 | 3.577170000  |
| H | -1.955565000 | 2.790026000  | 0.837593000  |
| H | -0.635490000 | -2.027324000 | 5.074989000  |
| H | 0.892539000  | -4.460628000 | 2.155990000  |
| H | 0.779007000  | -4.386005000 | -1.153115000 |
| H | 0.041676000  | -4.159557000 | 0.851098000  |
| O | -1.061420000 | -0.108392000 | 2.178167000  |
| O | -3.621945000 | 1.285621000  | 2.173216000  |
| O | -3.628455000 | 1.374583000  | -0.599475000 |
| O | -3.609523000 | -1.510816000 | 2.084246000  |
| O | -2.050455000 | -2.661208000 | 3.235424000  |
| O | 0.039274000  | -4.106735000 | 1.869147000  |
| O | 2.075293000  | -2.848282000 | 2.968763000  |
| O | 2.063308000  | -2.565454000 | -1.868587000 |
| O | 3.636089000  | -1.517208000 | 2.042111000  |
| O | 3.598943000  | -1.453503000 | -0.667149000 |
| O | 3.643801000  | 1.290207000  | 2.092450000  |
| O | 3.590457000  | 1.367793000  | -0.648027000 |
| O | 2.038680000  | 2.751329000  | -1.494211000 |
| O | 2.101883000  | 2.440827000  | 3.265601000  |
| O | 1.062412000  | 1.406952000  | 0.755313000  |
| O | 1.406518000  | -0.133260000 | 2.791252000  |
| O | 0.035133000  | -1.548697000 | 4.573482000  |
| O | -0.032547000 | 1.058394000  | 4.753158000  |
| O | 1.057493000  | -1.539334000 | 0.679153000  |
| O | -1.384263000 | -2.144072000 | 0.670055000  |
| O | -2.051615000 | -2.477181000 | -1.909603000 |
| O | 0.042044000  | -3.931101000 | -0.728967000 |
| O | -3.612240000 | -1.392849000 | -0.720924000 |
| O | -0.008417000 | 3.780999000  | 2.239228000  |
| O | 0.011084000  | 3.979091000  | -0.365404000 |
| O | -1.397482000 | 2.003316000  | 0.805268000  |
| O | -2.050049000 | 2.231273000  | 3.480105000  |
| O | -2.064714000 | 2.512618000  | -1.732411000 |
| O | 1.378257000  | -0.005058000 | -1.381707000 |
| O | -1.081756000 | -0.028555000 | -0.796153000 |
| H | 2.017432000  | -0.004764000 | -2.115475000 |



|    |              |              |              |
|----|--------------|--------------|--------------|
| O  | 0.136934000  | 1.882203000  | -3.130069000 |
| H  | 1.051057000  | 2.085503000  | -3.387218000 |
| Zr | 2.514946000  | -0.071399000 | 0.703513000  |
| Zr | -0.021946000 | -1.885952000 | 2.497035000  |
| Zr | 0.027504000  | 1.702679000  | 2.540373000  |
| Zr | -0.039804000 | 1.762479000  | -1.041463000 |
| Zr | -2.537868000 | -0.067563000 | 0.707307000  |
| Zr | 0.018070000  | -1.853706000 | -1.093288000 |
| C  | 0.075655000  | -0.448819000 | -4.176572000 |
| C  | 3.679552000  | -0.052087000 | -4.749470000 |
| C  | 2.866088000  | 1.061712000  | -5.386778000 |
| C  | -0.967060000 | 0.094076000  | -5.109092000 |
| C  | 2.452766000  | 0.894558000  | -6.831062000 |
| C  | -2.358383000 | 0.060071000  | -4.478340000 |
| H  | 3.372581000  | 0.899647000  | -7.445453000 |
| H  | 4.717839000  | -0.010580000 | -5.136810000 |
| H  | 1.115316000  | -0.082795000 | -4.321136000 |
| H  | -2.979882000 | 1.473002000  | -5.601606000 |
| H  | 2.066060000  | -0.146393000 | -6.935450000 |
| H  | 0.778849000  | 1.809841000  | -6.759488000 |
| H  | -2.305334000 | 0.586451000  | -3.502716000 |
| H  | -2.639848000 | -0.980205000 | -4.262629000 |
| H  | 4.088230000  | 0.775673000  | -3.038445000 |
| H  | -0.441571000 | 1.876948000  | -4.712496000 |
| H  | 3.292124000  | -1.034281000 | -5.066950000 |
| H  | -0.966016000 | -0.568225000 | -5.998680000 |
| O  | -0.166260000 | -1.310930000 | -3.347995000 |
| O  | 1.592761000  | 1.858832000  | -7.298849000 |
| O  | -3.312363000 | 0.605095000  | -5.336138000 |
| O  | 2.528050000  | 2.019734000  | -4.721802000 |
| O  | 3.625987000  | -0.014672000 | -3.354644000 |
| O  | -0.629074000 | 1.383457000  | -5.557024000 |

## 2. Hf-NU-1000 case

### Hf-NU-1000

|   |              |              |              |
|---|--------------|--------------|--------------|
| C | -3.248200000 | -2.182800000 | -1.650100000 |
| C | -3.229700000 | -2.386600000 | 2.900000000  |
| C | -3.232300000 | 2.034300000  | 3.104000000  |
| C | 3.276900000  | 2.142000000  | 2.939200000  |
| C | 3.226900000  | 2.366300000  | -1.338700000 |
| C | 3.259300000  | -2.277900000 | -1.561500000 |
| C | -3.265300000 | 2.236100000  | -1.457300000 |
| C | 3.257200000  | -2.506600000 | 2.716400000  |

|   |              |              |              |
|---|--------------|--------------|--------------|
| H | 4.086956000  | 2.683362000  | 3.474348000  |
| H | 4.063785000  | -3.157376000 | 3.120923000  |
| H | -4.031448000 | 2.543433000  | 3.686468000  |
| H | -4.029729000 | -2.994711000 | 3.375702000  |
| C | 5.678221000  | -2.765225000 | -1.968617000 |
| C | -5.649623000 | -2.654502000 | -2.168031000 |
| C | 4.334716000  | -3.004251000 | -2.287446000 |
| C | -4.294245000 | -2.873606000 | -2.447464000 |
| C | 4.015928000  | -3.929002000 | -3.290650000 |
| C | -3.932161000 | -3.748086000 | -3.480157000 |
| C | 5.027546000  | -4.604846000 | -3.966247000 |
| C | -4.914367000 | -4.393807000 | -4.225056000 |
| C | 6.363864000  | -4.363671000 | -3.643253000 |
| C | -6.263287000 | -4.170067000 | -3.944400000 |
| C | 6.687689000  | -3.444053000 | -2.644448000 |
| C | -6.629590000 | -3.300494000 | -2.915801000 |
| C | 5.642417000  | 3.002280000  | -1.555784000 |
| C | -5.694195000 | 2.738366000  | -1.818856000 |
| C | 4.305595000  | 3.214983000  | -1.916359000 |
| C | -4.352012000 | 3.027893000  | -2.096938000 |
| C | 3.987027000  | 4.232951000  | -2.824620000 |
| C | -4.037169000 | 4.070745000  | -2.977899000 |
| C | 4.993353000  | 5.029369000  | -3.363372000 |
| C | -5.052460000 | 4.813154000  | -3.573678000 |
| C | 6.322985000  | 4.817967000  | -2.994966000 |
| C | -6.388096000 | 4.518312000  | -3.295445000 |
| C | 6.646069000  | 3.804827000  | -2.090923000 |
| C | -6.707524000 | 3.480992000  | -2.417917000 |
| H | 5.910000000  | -2.041419000 | -1.185130000 |
| H | -5.913874000 | -1.971177000 | -1.358783000 |
| H | 2.965771000  | -4.102970000 | -3.532551000 |
| H | -2.871781000 | -3.910644000 | -3.681015000 |
| H | 4.775296000  | -5.322943000 | -4.749665000 |
| H | -4.629197000 | -5.075792000 | -5.029303000 |
| H | 7.733789000  | -3.255763000 | -2.393033000 |
| H | -7.685593000 | -3.126421000 | -2.697288000 |
| H | 5.874001000  | 2.203213000  | -0.848922000 |
| H | -5.922504000 | 1.924687000  | -1.128001000 |
| H | 2.942199000  | 4.376227000  | -3.107933000 |
| H | -2.986603000 | 4.288503000  | -3.179680000 |
| H | 4.742265000  | 5.817767000  | -4.076547000 |
| H | -4.803286000 | 5.626903000  | -4.258490000 |
| H | 7.687086000  | 3.640229000  | -1.803699000 |
| H | -7.753105000 | 3.251630000  | -2.200222000 |
| H | -7.033735000 | -4.676908000 | -4.530556000 |
| H | 7.157537000  | -4.894971000 | -4.173957000 |

|    |              |              |              |
|----|--------------|--------------|--------------|
| H  | -7.184619000 | 5.101103000  | -3.764486000 |
| H  | 7.112208000  | 5.445066000  | -3.416753000 |
| H  | -1.925409000 | -2.954614000 | 0.622181000  |
| H  | -0.871017000 | 1.410804000  | 5.075646000  |
| H  | -0.010757000 | 0.106277000  | 4.800275000  |
| H  | 0.021232000  | 4.010961000  | 0.564979000  |
| H  | 0.652989000  | 4.302714000  | 2.640349000  |
| H  | 0.868467000  | 4.306687000  | -0.740435000 |
| H  | 1.962876000  | -0.169559000 | 3.582645000  |
| H  | -1.937445000 | 2.793681000  | 0.826078000  |
| H  | -0.605581000 | -1.982688000 | 5.137817000  |
| H  | 0.894888000  | -4.438700000 | 2.213880000  |
| H  | 0.691959000  | -4.440747000 | -1.138847000 |
| H  | 0.036124000  | -4.156529000 | 0.910138000  |
| O  | -1.063919000 | -0.101326000 | 2.190762000  |
| O  | -3.619477000 | 1.286652000  | 2.167780000  |
| O  | -3.610371000 | 1.334904000  | -0.630233000 |
| O  | -3.608551000 | -1.508232000 | 2.086284000  |
| O  | -2.049388000 | -2.646119000 | 3.248123000  |
| O  | 0.044268000  | -4.080035000 | 1.924787000  |
| O  | 2.076556000  | -2.825573000 | 3.005400000  |
| O  | 2.047127000  | -2.549146000 | -1.862241000 |
| O  | 3.630235000  | -1.526407000 | 2.023340000  |
| O  | 3.601356000  | -1.433256000 | -0.689278000 |
| O  | 3.649088000  | 1.283984000  | 2.096557000  |
| O  | 3.585104000  | 1.355086000  | -0.652664000 |
| O  | 2.030867000  | 2.689980000  | -1.555499000 |
| O  | 2.098445000  | 2.450776000  | 3.238011000  |
| O  | 1.071278000  | 1.381143000  | 0.725378000  |
| O  | 1.410840000  | -0.120622000 | 2.792358000  |
| O  | 0.036194000  | -1.507218000 | 4.598789000  |
| O  | -0.022937000 | 1.118272000  | 4.713751000  |
| O  | 1.071491000  | -1.551540000 | 0.711826000  |
| O  | -1.386655000 | -2.157503000 | 0.702945000  |
| O  | -2.026573000 | -2.362188000 | -1.968573000 |
| O  | 0.006853000  | -3.935474000 | -0.687607000 |
| O  | -3.622137000 | -1.444752000 | -0.688212000 |
| O  | -0.005233000 | 3.781635000  | 2.167725000  |
| O  | 0.018324000  | 3.949761000  | -0.448571000 |
| O  | -1.393729000 | 1.998128000  | 0.770033000  |
| O  | -2.046890000 | 2.256393000  | 3.451979000  |
| O  | -2.074446000 | 2.502800000  | -1.771691000 |
| O  | 1.331427000  | -0.052916000 | -1.415530000 |
| O  | -1.079007000 | -0.057158000 | -0.749515000 |
| Hf | 2.535838000  | -0.053703000 | 0.697589000  |
| Hf | -0.021675000 | -1.860507000 | 2.537706000  |

|    |              |              |              |
|----|--------------|--------------|--------------|
| Hf | 0.036224000  | 1.712038000  | 2.490636000  |
| Hf | -0.047621000 | 1.740609000  | -1.114049000 |
| Hf | -2.539398000 | -0.065881000 | 0.715114000  |
| Hf | 0.020779000  | -1.855474000 | -0.994698000 |
| H  | 1.862959000  | 0.025816000  | -2.217973000 |
| O  | 0.063981000  | 1.618933000  | -3.135157000 |
| H  | -0.697872000 | 1.841724000  | -3.677665000 |

## Hf-NU-1000 Ads

|   |              |              |              |
|---|--------------|--------------|--------------|
| C | -3.248200000 | -2.182800000 | -1.650100000 |
| C | -3.229700000 | -2.386600000 | 2.900000000  |
| C | -3.232300000 | 2.034300000  | 3.104000000  |
| C | 3.276900000  | 2.142000000  | 2.939200000  |
| C | 3.226900000  | 2.366300000  | -1.338700000 |
| C | 3.259300000  | -2.277900000 | -1.561500000 |
| C | -3.265300000 | 2.236100000  | -1.457300000 |
| C | 3.257200000  | -2.506600000 | 2.716400000  |
| H | 4.087096000  | 2.710822000  | 3.445922000  |
| H | 4.062296000  | -3.141093000 | 3.148664000  |
| H | -4.032939000 | 2.564839000  | 3.664986000  |
| H | -4.033794000 | -2.968444000 | 3.400828000  |
| C | 5.661243000  | -2.729608000 | -2.109575000 |
| C | -5.635300000 | -2.255093000 | -2.386454000 |
| C | 4.307001000  | -3.027043000 | -2.306214000 |
| C | -4.345799000 | -2.801715000 | -2.445195000 |
| C | 3.941866000  | -4.034849000 | -3.210160000 |
| C | -4.106021000 | -3.912130000 | -3.265061000 |
| C | 4.921769000  | -4.734295000 | -3.908932000 |
| C | -5.135878000 | -4.461413000 | -4.022974000 |
| C | 6.270020000  | -4.431214000 | -3.711307000 |
| C | -6.413406000 | -3.903751000 | -3.970004000 |
| C | 6.638193000  | -3.428955000 | -2.812285000 |
| C | -6.661875000 | -2.800746000 | -3.151091000 |
| C | 5.637684000  | 2.931028000  | -1.724045000 |
| C | -5.687454000 | 2.717826000  | -1.866685000 |
| C | 4.287595000  | 3.164201000  | -2.015521000 |
| C | -4.344020000 | 2.951692000  | -2.189526000 |
| C | 3.942477000  | 4.147223000  | -2.952027000 |
| C | -4.024360000 | 3.854788000  | -3.211432000 |
| C | 4.934824000  | 4.888826000  | -3.586693000 |
| C | -5.036482000 | 4.514470000  | -3.901843000 |
| C | 6.278142000  | 4.656357000  | -3.287524000 |
| C | -6.372835000 | 4.280635000  | -3.574142000 |
| C | 6.627974000  | 3.677489000  | -2.356019000 |
| C | -6.697325000 | 3.382908000  | -2.555626000 |
| H | 5.926523000  | -1.942748000 | -1.401048000 |

|   |              |              |              |
|---|--------------|--------------|--------------|
| H | -5.809157000 | -1.394062000 | -1.738144000 |
| H | 2.880784000  | -4.259371000 | -3.350288000 |
| H | -3.105633000 | -4.349124000 | -3.304033000 |
| H | 4.635086000  | -5.521540000 | -4.609899000 |
| H | -4.936941000 | -5.323211000 | -4.663120000 |
| H | 7.693684000  | -3.192964000 | -2.659505000 |
| H | -7.662394000 | -2.364450000 | -3.109874000 |
| H | 5.889603000  | 2.158410000  | -0.995193000 |
| H | -5.919011000 | 2.011704000  | -1.067002000 |
| H | 2.886824000  | 4.309653000  | -3.179321000 |
| H | -2.974444000 | 4.021370000  | -3.457616000 |
| H | 4.661899000  | 5.651011000  | -4.320107000 |
| H | -4.783676000 | 5.213684000  | -4.701927000 |
| H | 7.679695000  | 3.495540000  | -2.123512000 |
| H | -7.743598000 | 3.201829000  | -2.298951000 |
| H | -7.220314000 | -4.330988000 | -4.570166000 |
| H | 7.038523000  | -4.980337000 | -4.260679000 |
| H | -7.166460000 | 4.800522000  | -4.116408000 |
| H | 7.056786000  | 5.239978000  | -3.784656000 |
| H | -1.912020000 | -2.934013000 | 0.581472000  |
| H | -0.879890000 | 1.326188000  | 5.118810000  |
| H | -0.015006000 | 0.028161000  | 4.799772000  |
| H | 0.031788000  | 4.022236000  | 0.661353000  |
| H | 0.658103000  | 4.282461000  | 2.714702000  |
| H | 0.900447000  | 4.331778000  | -0.631963000 |
| H | 1.967486000  | -0.207951000 | 3.581457000  |
| H | -1.935770000 | 2.797445000  | 0.846368000  |
| H | -0.610361000 | -2.040670000 | 5.082119000  |
| H | 0.895620000  | -4.461287000 | 2.132008000  |
| H | 0.652054000  | -4.408980000 | -1.248399000 |
| H | 0.046425000  | -4.144684000 | 0.824632000  |
| O | -1.055798000 | -0.106185000 | 2.191536000  |
| O | -3.614066000 | 1.286582000  | 2.166845000  |
| O | -3.612135000 | 1.366923000  | -0.600332000 |
| O | -3.605928000 | -1.508771000 | 2.080439000  |
| O | -2.047805000 | -2.669665000 | 3.217909000  |
| O | 0.050761000  | -4.087985000 | 1.845841000  |
| O | 2.074702000  | -2.841940000 | 2.975770000  |
| O | 2.049403000  | -2.535890000 | -1.843250000 |
| O | 3.634526000  | -1.528559000 | 2.022675000  |
| O | 3.629601000  | -1.427919000 | -0.702389000 |
| O | 3.645690000  | 1.279189000  | 2.105004000  |
| O | 3.599575000  | 1.408007000  | -0.601011000 |
| O | 2.020990000  | 2.692836000  | -1.545981000 |
| O | 2.099556000  | 2.431440000  | 3.270651000  |
| O | 1.074539000  | 1.409701000  | 0.778558000  |

|    |              |              |              |
|----|--------------|--------------|--------------|
| O  | 1.413493000  | -0.140051000 | 2.794052000  |
| O  | 0.037667000  | -1.552867000 | 4.561926000  |
| O  | -0.031954000 | 1.048536000  | 4.745643000  |
| O  | 1.073545000  | -1.539077000 | 0.679998000  |
| O  | -1.377352000 | -2.134619000 | 0.661805000  |
| O  | -2.051757000 | -2.473381000 | -1.946102000 |
| O  | -0.003944000 | -3.911638000 | -0.745950000 |
| O  | -3.585584000 | -1.383441000 | -0.728101000 |
| O  | -0.008555000 | 3.774384000  | 2.239377000  |
| O  | 0.046657000  | 3.969820000  | -0.357987000 |
| O  | -1.382174000 | 2.007805000  | 0.807607000  |
| O  | -2.050400000 | 2.233788000  | 3.479280000  |
| O  | -2.062419000 | 2.518358000  | -1.738269000 |
| O  | 1.397499000  | 0.021033000  | -1.324433000 |
| O  | -1.071247000 | -0.023636000 | -0.768415000 |
| H  | 1.914163000  | 0.013873000  | -2.155662000 |
| O  | -0.006985000 | 1.536775000  | -3.126993000 |
| H  | -0.824039000 | 1.904841000  | -3.497358000 |
| Hf | 2.535936000  | -0.065992000 | 0.695946000  |
| Hf | -0.008885000 | -1.883275000 | 2.484825000  |
| Hf | 0.037244000  | 1.695856000  | 2.549816000  |
| Hf | -0.015160000 | 1.764676000  | -1.008129000 |
| Hf | -2.520880000 | -0.064304000 | 0.720811000  |
| Hf | 0.036399000  | -1.827698000 | -1.094258000 |
| C  | -1.731339000 | -2.361383000 | -5.237182000 |
| C  | -0.292075000 | -2.738506000 | -4.842468000 |
| C  | 0.326562000  | -1.371079000 | -4.551720000 |
| C  | -1.630954000 | -0.905564000 | -5.707068000 |
| C  | 1.833796000  | -1.204681000 | -4.654719000 |
| C  | -2.510768000 | 0.083956000  | -4.960864000 |
| H  | 2.326410000  | -2.066903000 | -4.187239000 |
| H  | 0.225803000  | -3.175380000 | -5.717378000 |
| H  | -2.341425000 | -2.397583000 | -4.322202000 |
| H  | -1.193418000 | 1.393149000  | -5.409618000 |
| H  | 2.109191000  | -1.193720000 | -5.723677000 |
| H  | 1.693964000  | 0.698267000  | -4.171067000 |
| H  | -2.428498000 | -0.103590000 | -3.869838000 |
| H  | -3.567360000 | -0.070261000 | -5.232154000 |
| H  | -0.965232000 | -3.534761000 | -3.203885000 |
| H  | -0.117929000 | 0.019864000  | -3.206344000 |
| H  | -1.838267000 | -3.263534000 | -6.945367000 |
| H  | -1.822526000 | -0.826961000 | -6.790990000 |
| O  | -2.353933000 | -3.242317000 | -6.130283000 |
| O  | 2.289375000  | -0.050751000 | -3.984015000 |
| O  | -2.153934000 | 1.406007000  | -5.282818000 |
| O  | -0.129098000 | -1.010189000 | -3.260289000 |

|   |              |              |              |
|---|--------------|--------------|--------------|
| O | -0.186579000 | -3.642419000 | -3.781499000 |
| O | -0.255057000 | -0.520310000 | -5.511585000 |

## Hf-NU-1000 TS1

|   |              |              |              |
|---|--------------|--------------|--------------|
| C | -3.248200000 | -2.182800000 | -1.650100000 |
| C | -3.229700000 | -2.386600000 | 2.900000000  |
| C | -3.232300000 | 2.034300000  | 3.104000000  |
| C | 3.276900000  | 2.142000000  | 2.939200000  |
| C | 3.226900000  | 2.366300000  | -1.338700000 |
| C | 3.259300000  | -2.277900000 | -1.561500000 |
| C | -3.265300000 | 2.236100000  | -1.457300000 |
| C | 3.257200000  | -2.506600000 | 2.716400000  |
| H | 4.086842000  | 2.714386000  | 3.442434000  |
| H | 4.061768000  | -3.137449000 | 3.154833000  |
| H | -4.032254000 | 2.568267000  | 3.662723000  |
| H | -4.033253000 | -2.965759000 | 3.404837000  |
| C | 5.661623000  | -2.730321000 | -2.109748000 |
| C | -5.640189000 | -2.278143000 | -2.369037000 |
| C | 4.307743000  | -3.034450000 | -2.298076000 |
| C | -4.346407000 | -2.813756000 | -2.435092000 |
| C | 3.943212000  | -4.057236000 | -3.185248000 |
| C | -4.103324000 | -3.925858000 | -3.251772000 |
| C | 4.923217000  | -4.764701000 | -3.875765000 |
| C | -5.134224000 | -4.487707000 | -3.998976000 |
| C | 6.271081000  | -4.454445000 | -3.686991000 |
| C | -6.416181000 | -3.941100000 | -3.938553000 |
| C | 6.638708000  | -3.437262000 | -2.804655000 |
| C | -6.667910000 | -2.836413000 | -3.122923000 |
| C | 5.635952000  | 2.937713000  | -1.719230000 |
| C | -5.685195000 | 2.711642000  | -1.882833000 |
| C | 4.285773000  | 3.170235000  | -2.011232000 |
| C | -4.340193000 | 2.951198000  | -2.194866000 |
| C | 3.940609000  | 4.158185000  | -2.942612000 |
| C | -4.015793000 | 3.858874000  | -3.211214000 |
| C | 4.932628000  | 4.904812000  | -3.571872000 |
| C | -5.024946000 | 4.517918000  | -3.906570000 |
| C | 6.275916000  | 4.672157000  | -3.272779000 |
| C | -6.362927000 | 4.278212000  | -3.589878000 |
| C | 6.625930000  | 3.688600000  | -2.346305000 |
| C | -6.692066000 | 3.375551000  | -2.577218000 |
| H | 5.926606000  | -1.932279000 | -1.413730000 |
| H | -5.816597000 | -1.415697000 | -1.723331000 |
| H | 2.882420000  | -4.287161000 | -3.318922000 |
| H | -3.099686000 | -4.354553000 | -3.296874000 |
| H | 4.636801000  | -5.563735000 | -4.563379000 |
| H | -4.932785000 | -5.350963000 | -4.636366000 |

|   |              |              |              |
|---|--------------|--------------|--------------|
| H | 7.693918000  | -3.195715000 | -2.658633000 |
| H | -7.671911000 | -2.408768000 | -3.075813000 |
| H | 5.888003000  | 2.161765000  | -0.993998000 |
| H | -5.920181000 | 2.001721000  | -1.087515000 |
| H | 2.885125000  | 4.321859000  | -3.169671000 |
| H | -2.964523000 | 4.029550000  | -3.448473000 |
| H | 4.659465000  | 5.671274000  | -4.300715000 |
| H | -4.768649000 | 5.221250000  | -4.701932000 |
| H | 7.677598000  | 3.506552000  | -2.113753000 |
| H | -7.739627000 | 3.189685000  | -2.329445000 |
| H | -7.223987000 | -4.378318000 | -4.530279000 |
| H | 7.039681000  | -5.009712000 | -4.230036000 |
| H | -7.154228000 | 4.797357000  | -4.136224000 |
| H | 7.054334000  | 5.259509000  | -3.765815000 |
| H | -1.911591000 | -2.932205000 | 0.575612000  |
| H | -0.878744000 | 1.311766000  | 5.126950000  |
| H | -0.015277000 | 0.013602000  | 4.797045000  |
| H | 0.036024000  | 4.019670000  | 0.673007000  |
| H | 0.660577000  | 4.276955000  | 2.721338000  |
| H | 0.910292000  | 4.327820000  | -0.618085000 |
| H | 1.966125000  | -0.214081000 | 3.579471000  |
| H | -1.933712000 | 2.801127000  | 0.850175000  |
| H | -0.609166000 | -2.049869000 | 5.070467000  |
| H | 0.893786000  | -4.464130000 | 2.116711000  |
| H | 0.642407000  | -4.403965000 | -1.259282000 |
| H | 0.045998000  | -4.138924000 | 0.808103000  |
| O | -1.057070000 | -0.106532000 | 2.191878000  |
| O | -3.614626000 | 1.286897000  | 2.167201000  |
| O | -3.613853000 | 1.370631000  | -0.598369000 |
| O | -3.607964000 | -1.508051000 | 2.081620000  |
| O | -2.047419000 | -2.672712000 | 3.211784000  |
| O | 0.050002000  | -4.087792000 | 1.831699000  |
| O | 2.074423000  | -2.844402000 | 2.969245000  |
| O | 2.051161000  | -2.536852000 | -1.841302000 |
| O | 3.635996000  | -1.529367000 | 2.021822000  |
| O | 3.631441000  | -1.422645000 | -0.706694000 |
| O | 3.644870000  | 1.278518000  | 2.105936000  |
| O | 3.599534000  | 1.417460000  | -0.592494000 |
| O | 2.017225000  | 2.682408000  | -1.560786000 |
| O | 2.099385000  | 2.428839000  | 3.274299000  |
| O | 1.073232000  | 1.412147000  | 0.782900000  |
| O | 1.413393000  | -0.142862000 | 2.791457000  |
| O | 0.038951000  | -1.559403000 | 4.552894000  |
| O | -0.032457000 | 1.036031000  | 4.748875000  |
| O | 1.071548000  | -1.536057000 | 0.671746000  |
| O | -1.380201000 | -2.130536000 | 0.654561000  |



|                 |              |              |              |
|-----------------|--------------|--------------|--------------|
| O               | -2.052727000 | -2.468701000 | -1.949369000 |
| O               | -0.007603000 | -3.903808000 | -0.751837000 |
| O               | -3.586400000 | -1.378074000 | -0.732334000 |
| O               | -0.008043000 | 3.771714000  | 2.245619000  |
| O               | 0.054814000  | 3.967294000  | -0.347699000 |
| O               | -1.382109000 | 2.009979000  | 0.813681000  |
| O               | -2.050594000 | 2.230487000  | 3.482397000  |
| O               | -2.058941000 | 2.515456000  | -1.736259000 |
| O               | 1.404908000  | 0.027900000  | -1.316895000 |
| O               | -1.069589000 | -0.018223000 | -0.760202000 |
| H               | 1.913132000  | 0.010895000  | -2.153108000 |
| O               | -0.032635000 | 1.429109000  | -3.130015000 |
| H               | -0.849325000 | 1.768137000  | -3.532750000 |
| Hf              | 2.535784000  | -0.072316000 | 0.695620000  |
| Hf              | -0.008196000 | -1.886802000 | 2.472256000  |
| Hf              | 0.035517000  | 1.691635000  | 2.558426000  |
| Hf              | -0.013513000 | 1.760298000  | -0.989085000 |
| Hf              | -2.523553000 | -0.066828000 | 0.722937000  |
| Hf              | 0.033317000  | -1.820520000 | -1.119744000 |
| C               | -1.717950000 | -2.377599000 | -5.219590000 |
| C               | -0.283821000 | -2.756469000 | -4.814072000 |
| C               | 0.342335000  | -1.392307000 | -4.516453000 |
| C               | -1.607136000 | -0.922882000 | -5.691334000 |
| C               | 1.853136000  | -1.259456000 | -4.644090000 |
| C               | -2.482620000 | 0.067667000  | -4.940750000 |
| H               | 2.332905000  | -2.128872000 | -4.178090000 |
| H               | 0.236270000  | -3.197796000 | -5.685922000 |
| H               | -2.337643000 | -2.410359000 | -4.311500000 |
| H               | -1.163534000 | 1.348654000  | -5.470341000 |
| H               | 2.119680000  | -1.257696000 | -5.715233000 |
| H               | 1.808356000  | 0.655036000  | -4.230463000 |
| H               | -2.407672000 | -0.128335000 | -3.851458000 |
| H               | -3.539600000 | -0.071899000 | -5.219703000 |
| H               | -0.968279000 | -3.552866000 | -3.180331000 |
| H               | -0.088723000 | 0.138019000  | -3.208242000 |
| H               | -1.801126000 | -3.295416000 | -6.920650000 |
| H               | -1.806810000 | -0.846046000 | -6.774296000 |
| O               | -2.335213000 | -3.258265000 | -6.118131000 |
| O               | 2.346611000  | -0.114271000 | -3.981125000 |
| O               | -2.104265000 | 1.392704000  | -5.242030000 |
| O               | -0.095217000 | -1.001682000 | -3.247578000 |
| O               | -0.186326000 | -3.661618000 | -3.752283000 |
| O               | -0.230768000 | -0.546874000 | -5.505225000 |
| Hf-NU-1000 Int1 |              |              |              |
| C               | -3.248200000 | -2.182800000 | -1.650100000 |

|   |              |              |              |
|---|--------------|--------------|--------------|
| C | -3.229700000 | -2.386600000 | 2.900000000  |
| C | -3.232300000 | 2.034300000  | 3.104000000  |
| C | 3.276900000  | 2.142000000  | 2.939200000  |
| C | 3.226900000  | 2.366300000  | -1.338700000 |
| C | 3.259300000  | -2.277900000 | -1.561500000 |
| C | -3.265300000 | 2.236100000  | -1.457300000 |
| C | 3.257200000  | -2.506600000 | 2.716400000  |
| H | 4.087439000  | 2.718314000  | 3.437238000  |
| H | 4.061512000  | -3.126569000 | 3.170391000  |
| H | -4.030797000 | 2.575517000  | 3.657852000  |
| H | -4.031665000 | -2.962276000 | 3.411362000  |
| C | 5.657574000  | -2.564843000 | -2.236869000 |
| C | -5.657456000 | -2.338157000 | -2.305835000 |
| C | 4.328043000  | -3.000571000 | -2.309308000 |
| C | -4.351364000 | -2.836962000 | -2.409250000 |
| C | 4.009517000  | -4.121315000 | -3.089084000 |
| C | -4.099572000 | -3.940721000 | -3.234780000 |
| C | 5.007923000  | -4.793819000 | -3.788777000 |
| C | -5.135168000 | -4.530121000 | -3.953707000 |
| C | 6.328977000  | -4.348182000 | -3.721022000 |
| C | -6.430239000 | -4.021561000 | -3.854769000 |
| C | 6.652273000  | -3.233155000 | -2.945900000 |
| C | -6.690272000 | -2.925502000 | -3.030034000 |
| C | 5.633925000  | 2.929986000  | -1.745012000 |
| C | -5.680689000 | 2.672657000  | -1.941568000 |
| C | 4.282094000  | 3.152809000  | -2.038489000 |
| C | -4.332675000 | 2.933228000  | -2.221982000 |
| C | 3.932316000  | 4.112388000  | -2.997333000 |
| C | -3.998413000 | 3.842357000  | -3.233893000 |
| C | 4.921572000  | 4.839883000  | -3.653031000 |
| C | -5.001024000 | 4.483063000  | -3.955458000 |
| C | 6.266304000  | 4.617619000  | -3.352371000 |
| C | -6.342200000 | 4.222248000  | -3.670378000 |
| C | 6.621005000  | 3.662783000  | -2.397890000 |
| C | -6.681020000 | 3.317267000  | -2.662995000 |
| H | 5.890262000  | -1.697757000 | -1.615213000 |
| H | -5.839873000 | -1.481879000 | -1.653677000 |
| H | 2.970277000  | -4.458020000 | -3.131264000 |
| H | -3.085000000 | -4.337240000 | -3.311793000 |
| H | 4.756122000  | -5.670923000 | -4.389175000 |
| H | -4.926501000 | -5.384865000 | -4.600192000 |
| H | 7.687122000  | -2.887683000 | -2.890530000 |
| H | -7.704638000 | -2.527492000 | -2.952853000 |
| H | 5.889390000  | 2.178174000  | -0.995639000 |
| H | -5.922824000 | 1.960540000  | -1.150351000 |
| H | 2.875833000  | 4.267135000  | -3.225134000 |

|   |              |              |              |
|---|--------------|--------------|--------------|
| H | -2.944432000 | 4.029683000  | -3.445438000 |
| H | 4.644882000  | 5.583618000  | -4.403737000 |
| H | -4.737232000 | 5.188701000  | -4.746352000 |
| H | 7.673695000  | 3.490476000  | -2.162315000 |
| H | -7.731083000 | 3.114171000  | -2.440829000 |
| H | -7.241888000 | -4.481148000 | -4.424009000 |
| H | 7.111493000  | -4.875174000 | -4.272268000 |
| H | -7.128432000 | 4.726516000  | -4.237563000 |
| H | 7.042164000  | 5.191078000  | -3.865376000 |
| H | -1.922649000 | -2.917823000 | 0.564641000  |
| H | -0.876143000 | 1.285051000  | 5.144521000  |
| H | -0.017242000 | -0.014454000 | 4.792291000  |
| H | 0.035972000  | 4.024144000  | 0.702192000  |
| H | 0.670087000  | 4.263222000  | 2.740844000  |
| H | 0.909970000  | 4.334038000  | -0.590958000 |
| H | 1.961776000  | -0.224261000 | 3.579855000  |
| H | -1.932031000 | 2.809245000  | 0.860729000  |
| H | -0.610339000 | -2.065987000 | 5.045780000  |
| H | 0.893403000  | -4.467276000 | 2.057697000  |
| H | 0.643328000  | -4.388269000 | -1.273528000 |
| H | 0.030013000  | -4.124079000 | 0.760573000  |
| O | -1.058134000 | -0.105870000 | 2.188085000  |
| O | -3.615360000 | 1.287674000  | 2.167832000  |
| O | -3.618579000 | 1.383501000  | -0.589784000 |
| O | -3.611493000 | -1.504652000 | 2.086428000  |
| O | -2.046115000 | -2.679316000 | 3.199390000  |
| O | 0.049071000  | -4.082752000 | 1.786429000  |
| O | 2.074293000  | -2.849552000 | 2.957284000  |
| O | 2.064083000  | -2.597191000 | -1.793250000 |
| O | 3.638060000  | -1.534375000 | 2.013636000  |
| O | 3.628483000  | -1.384267000 | -0.739252000 |
| O | 3.642517000  | 1.280728000  | 2.102829000  |
| O | 3.602542000  | 1.419590000  | -0.594097000 |
| O | 2.015435000  | 2.695559000  | -1.541738000 |
| O | 2.100038000  | 2.422844000  | 3.283351000  |
| O | 1.069704000  | 1.413746000  | 0.789957000  |
| O | 1.413979000  | -0.146885000 | 2.788981000  |
| O | 0.039674000  | -1.570661000 | 4.535184000  |
| O | -0.033977000 | 1.012030000  | 4.755845000  |
| O | 1.070955000  | -1.524467000 | 0.657950000  |
| O | -1.389238000 | -2.117570000 | 0.643211000  |
| O | -2.058036000 | -2.463001000 | -1.955469000 |
| O | -0.033624000 | -3.893631000 | -0.796870000 |
| O | -3.586526000 | -1.364127000 | -0.739468000 |
| O | -0.005081000 | 3.766271000  | 2.265432000  |
| O | 0.053857000  | 3.974701000  | -0.320548000 |

|    |              |              |              |
|----|--------------|--------------|--------------|
| O  | -1.381960000 | 2.016841000  | 0.828024000  |
| O  | -2.051039000 | 2.223270000  | 3.489565000  |
| O  | -2.054197000 | 2.516950000  | -1.727336000 |
| O  | 1.398739000  | 0.047310000  | -1.336808000 |
| O  | -1.075722000 | 0.003093000  | -0.765355000 |
| H  | 1.888785000  | -0.015018000 | -2.179475000 |
| O  | -0.026469000 | 1.461918000  | -3.166306000 |
| H  | -0.831881000 | 1.701670000  | -3.675254000 |
| Hf | 2.534224000  | -0.080952000 | 0.691681000  |
| Hf | -0.007669000 | -1.890725000 | 2.447536000  |
| Hf | 0.031700000  | 1.683037000  | 2.576221000  |
| Hf | -0.014234000 | 1.766979000  | -0.951567000 |
| Hf | -2.529895000 | -0.069829000 | 0.721226000  |
| Hf | 0.020252000  | -1.804698000 | -1.165010000 |
| C  | -1.739439000 | -2.415576000 | -5.220836000 |
| C  | -0.330362000 | -2.907099000 | -4.869455000 |
| C  | 0.388292000  | -1.603367000 | -4.479648000 |
| C  | -1.522892000 | -0.960207000 | -5.650670000 |
| C  | 1.897971000  | -1.638392000 | -4.652337000 |
| C  | -2.348949000 | 0.050655000  | -4.875344000 |
| H  | 2.264665000  | -2.591807000 | -4.236018000 |
| H  | 0.146665000  | -3.313606000 | -5.782141000 |
| H  | -2.336874000 | -2.431376000 | -4.298379000 |
| H  | -1.053396000 | 1.282886000  | -5.598222000 |
| H  | 2.137763000  | -1.611518000 | -5.728801000 |
| H  | 3.416435000  | -0.522204000 | -4.150011000 |
| H  | -2.262571000 | -0.160022000 | -3.791394000 |
| H  | -3.415156000 | -0.033251000 | -5.143082000 |
| H  | -0.894917000 | -3.679542000 | -3.185780000 |
| H  | 0.078842000  | 0.477968000  | -3.316165000 |
| H  | -1.906578000 | -3.309991000 | -6.927070000 |
| H  | -1.725694000 | -0.846578000 | -6.731688000 |
| O  | -2.445509000 | -3.214135000 | -6.132882000 |
| O  | 2.469201000  | -0.532322000 | -3.972899000 |
| O  | -1.904095000 | 1.375108000  | -5.142462000 |
| O  | 0.023966000  | -1.221730000 | -3.224984000 |
| O  | -0.272844000 | -3.909036000 | -3.898850000 |
| O  | -0.133425000 | -0.675420000 | -5.457799000 |

## Hf-NU-1000 TS2

|   |              |              |              |
|---|--------------|--------------|--------------|
| C | -3.248200000 | -2.182800000 | -1.650100000 |
| C | -3.229700000 | -2.386600000 | 2.900000000  |
| C | -3.232300000 | 2.034300000  | 3.104000000  |
| C | 3.276900000  | 2.142000000  | 2.939200000  |
| C | 3.226900000  | 2.366300000  | -1.338700000 |
| C | 3.259300000  | -2.277900000 | -1.561500000 |

|   |              |              |              |
|---|--------------|--------------|--------------|
| C | -3.265300000 | 2.236100000  | -1.457300000 |
| C | 3.257200000  | -2.506600000 | 2.716400000  |
| H | 4.088917000  | 2.693578000  | 3.461934000  |
| H | 4.064835000  | -3.144179000 | 3.139817000  |
| H | -4.030731000 | 2.556913000  | 3.675431000  |
| H | -4.030556000 | -2.985544000 | 3.386024000  |
| C | 5.643893000  | -2.396944000 | -2.338248000 |
| C | -5.670279000 | -2.312511000 | -2.270383000 |
| C | 4.331821000  | -2.884146000 | -2.407706000 |
| C | -4.350509000 | -2.730892000 | -2.491901000 |
| C | 4.031337000  | -3.930630000 | -3.290894000 |
| C | -4.083183000 | -3.642346000 | -3.521170000 |
| C | 5.027820000  | -4.478947000 | -4.094401000 |
| C | -5.116048000 | -4.125375000 | -4.318769000 |
| C | 6.330890000  | -3.982985000 | -4.026023000 |
| C | -6.426467000 | -3.704720000 | -4.092547000 |
| C | 6.637211000  | -2.941830000 | -3.148237000 |
| C | -6.702223000 | -2.797921000 | -3.067533000 |
| C | 5.648914000  | 2.914538000  | -1.686850000 |
| C | -5.685519000 | 2.684626000  | -1.898733000 |
| C | 4.303978000  | 3.181681000  | -1.975106000 |
| C | -4.342368000 | 3.020121000  | -2.115350000 |
| C | 3.983191000  | 4.214704000  | -2.865594000 |
| C | -4.023296000 | 4.095669000  | -2.953614000 |
| C | 4.991650000  | 4.967882000  | -3.460427000 |
| C | -5.036165000 | 4.828574000  | -3.563537000 |
| C | 6.329063000  | 4.697057000  | -3.167704000 |
| C | -6.372451000 | 4.487946000  | -3.348046000 |
| C | 6.655933000  | 3.670695000  | -2.280020000 |
| C | -6.696512000 | 3.414798000  | -2.516384000 |
| H | 5.864159000  | -1.588679000 | -1.637639000 |
| H | -5.864712000 | -1.600117000 | -1.466580000 |
| H | 3.006661000  | -4.308604000 | -3.331143000 |
| H | -3.055781000 | -3.963366000 | -3.700625000 |
| H | 4.789014000  | -5.298432000 | -4.776060000 |
| H | -4.894256000 | -4.826487000 | -5.125937000 |
| H | 7.658051000  | -2.557119000 | -3.092077000 |
| H | -7.728147000 | -2.466116000 | -2.892158000 |
| H | 5.882955000  | 2.109481000  | -0.987555000 |
| H | -5.916131000 | 1.844214000  | -1.241273000 |
| H | 2.932780000  | 4.416968000  | -3.086051000 |
| H | -2.973790000 | 4.342930000  | -3.116884000 |
| H | 4.735269000  | 5.770835000  | -4.155198000 |
| H | -4.784018000 | 5.667725000  | -4.215639000 |
| H | 7.702792000  | 3.461432000  | -2.048496000 |
| H | -7.742608000 | 3.148546000  | -2.348756000 |

|   |              |              |              |
|---|--------------|--------------|--------------|
| H | -7.237210000 | -4.082095000 | -4.720527000 |
| H | 7.112154000  | -4.412718000 | -4.657467000 |
| H | -7.166512000 | 5.062382000  | -3.831649000 |
| H | 7.120355000  | 5.289807000  | -3.632859000 |
| H | -1.939312000 | -2.927765000 | 0.601647000  |
| H | -0.875136000 | 1.360969000  | 5.101315000  |
| H | -0.013085000 | 0.058864000  | 4.793875000  |
| H | 0.021804000  | 4.000733000  | 0.614374000  |
| H | 0.653055000  | 4.291946000  | 2.670709000  |
| H | 0.888518000  | 4.292589000  | -0.679951000 |
| H | 1.963306000  | -0.180924000 | 3.576220000  |
| H | -1.946125000 | 2.788768000  | 0.817689000  |
| H | -0.610201000 | -2.007022000 | 5.097290000  |
| H | 0.889809000  | -4.453419000 | 2.155974000  |
| H | 0.715300000  | -4.421176000 | -1.134103000 |
| H | 0.020943000  | -4.147999000 | 0.857899000  |
| O | -1.059484000 | -0.099798000 | 2.181778000  |
| O | -3.618234000 | 1.286602000  | 2.168619000  |
| O | -3.616139000 | 1.341011000  | -0.626321000 |
| O | -3.610980000 | -1.504300000 | 2.089483000  |
| O | -2.048136000 | -2.657200000 | 3.230200000  |
| O | 0.040322000  | -4.084184000 | 1.878678000  |
| O | 2.076629000  | -2.833826000 | 2.991835000  |
| O | 2.075390000  | -2.655991000 | -1.761349000 |
| O | 3.631607000  | -1.531881000 | 2.014934000  |
| O | 3.617898000  | -1.400218000 | -0.721510000 |
| O | 3.642578000  | 1.281992000  | 2.098839000  |
| O | 3.590123000  | 1.397331000  | -0.614759000 |
| O | 2.026961000  | 2.688628000  | -1.577413000 |
| O | 2.098978000  | 2.445681000  | 3.254381000  |
| O | 1.063179000  | 1.411665000  | 0.746932000  |
| O | 1.409552000  | -0.124367000 | 2.787750000  |
| O | 0.037405000  | -1.525175000 | 4.571063000  |
| O | -0.028240000 | 1.078254000  | 4.729541000  |
| O | 1.067204000  | -1.544001000 | 0.697554000  |
| O | -1.388229000 | -2.139651000 | 0.681311000  |
| O | -2.059085000 | -2.480301000 | -1.943624000 |
| O | -0.012438000 | -3.943084000 | -0.721350000 |
| O | -3.589389000 | -1.417176000 | -0.693901000 |
| O | -0.014320000 | 3.779271000  | 2.201534000  |
| O | 0.033748000  | 3.936658000  | -0.402690000 |
| O | -1.395738000 | 1.996581000  | 0.786719000  |
| O | -2.047851000 | 2.243650000  | 3.466469000  |
| O | -2.062844000 | 2.494524000  | -1.754391000 |
| O | 1.375402000  | -0.013880000 | -1.334775000 |
| O | -1.098088000 | -0.041680000 | -0.796417000 |

|    |              |              |              |
|----|--------------|--------------|--------------|
| H  | 1.849851000  | -0.057833000 | -2.184765000 |
| O  | 0.106457000  | 1.817951000  | -3.181831000 |
| H  | 0.964756000  | 2.184822000  | -3.431009000 |
| Hf | 2.518134000  | -0.073548000 | 0.696150000  |
| Hf | -0.016281000 | -1.874099000 | 2.497326000  |
| Hf | 0.029551000  | 1.705238000  | 2.525124000  |
| Hf | -0.038543000 | 1.721976000  | -1.046208000 |
| Hf | -2.537028000 | -0.072267000 | 0.715387000  |
| Hf | 0.013082000  | -1.857927000 | -1.077409000 |
| C  | -1.819345000 | -1.588252000 | -5.310613000 |
| C  | -0.463095000 | -2.301216000 | -5.316798000 |
| C  | 0.435198000  | -1.468115000 | -4.408779000 |
| C  | -1.552844000 | -0.086772000 | -5.428458000 |
| C  | 1.896434000  | -1.341719000 | -4.751608000 |
| C  | -2.485688000 | 0.746225000  | -4.571027000 |
| H  | 2.320119000  | -2.352851000 | -4.595466000 |
| H  | -0.058759000 | -2.344857000 | -6.343872000 |
| H  | -2.261320000 | -1.791706000 | -4.319668000 |
| H  | -1.569835000 | 2.358515000  | -4.079919000 |
| H  | 2.013128000  | -1.084337000 | -5.817703000 |
| H  | 3.467636000  | -0.506893000 | -3.953682000 |
| H  | -2.382949000 | 0.405197000  | -3.518066000 |
| H  | -3.517975000 | 0.502026000  | -4.877005000 |
| H  | -0.857445000 | -3.562016000 | -3.925355000 |
| H  | -0.081880000 | 0.799416000  | -4.270517000 |
| H  | -2.383508000 | -1.941268000 | -7.124471000 |
| H  | -1.640850000 | 0.228710000  | -6.484521000 |
| O  | -2.742774000 | -2.074800000 | -6.238873000 |
| O  | 2.510640000  | -0.388624000 | -3.913868000 |
| O  | -2.276634000 | 2.116236000  | -4.706263000 |
| O  | 0.099029000  | -1.520180000 | -3.193099000 |
| O  | -0.526010000 | -3.615464000 | -4.838230000 |
| O  | -0.173664000 | 0.115963000  | -5.053935000 |

## Hf-NU-1000 Int2

|   |              |              |              |
|---|--------------|--------------|--------------|
| C | -3.248200000 | -2.182800000 | -1.650100000 |
| C | -3.229700000 | -2.386600000 | 2.900000000  |
| C | -3.232300000 | 2.034300000  | 3.104000000  |
| C | 3.276900000  | 2.142000000  | 2.939200000  |
| C | 3.226900000  | 2.366300000  | -1.338700000 |
| C | 3.259300000  | -2.277900000 | -1.561500000 |
| C | -3.265300000 | 2.236100000  | -1.457300000 |
| C | 3.257200000  | -2.506600000 | 2.716400000  |
| H | 4.086176000  | 2.689243000  | 3.470003000  |
| H | 4.063608000  | -3.148748000 | 3.134658000  |
| H | -4.031709000 | 2.545132000  | 3.684140000  |

|   |              |              |              |
|---|--------------|--------------|--------------|
| H | -4.031601000 | -2.983438000 | 3.386497000  |
| C | 5.671182000  | -2.566354000 | -2.182954000 |
| C | -5.641984000 | -2.336955000 | -2.371545000 |
| C | 4.329698000  | -2.917527000 | -2.378274000 |
| C | -4.316969000 | -2.773730000 | -2.501343000 |
| C | 3.998070000  | -3.863139000 | -3.358836000 |
| C | -3.997799000 | -3.742023000 | -3.461574000 |
| C | 4.996203000  | -4.447791000 | -4.133291000 |
| C | -4.990237000 | -4.261783000 | -4.287110000 |
| C | 6.331712000  | -4.093980000 | -3.933036000 |
| C | -6.306707000 | -3.817711000 | -4.159303000 |
| C | 6.667473000  | -3.153702000 | -2.957897000 |
| C | -6.631885000 | -2.856169000 | -3.200537000 |
| C | 5.647107000  | 2.937466000  | -1.637948000 |
| C | -5.684247000 | 2.784338000  | -1.772663000 |
| C | 4.305439000  | 3.196565000  | -1.946287000 |
| C | -4.341647000 | 3.079012000  | -2.040841000 |
| C | 3.990575000  | 4.238751000  | -2.827653000 |
| C | -4.023255000 | 4.177265000  | -2.849246000 |
| C | 5.001629000  | 5.011096000  | -3.392130000 |
| C | -5.033853000 | 4.970499000  | -3.381598000 |
| C | 6.336070000  | 4.749285000  | -3.078332000 |
| C | -6.370691000 | 4.669431000  | -3.115263000 |
| C | 6.656929000  | 3.712429000  | -2.200946000 |
| C | -6.694539000 | 3.575767000  | -2.311353000 |
| H | 5.911650000  | -1.826636000 | -1.417166000 |
| H | -5.872326000 | -1.580432000 | -1.618717000 |
| H | 2.947691000  | -4.128487000 | -3.504651000 |
| H | -2.961193000 | -4.077448000 | -3.545291000 |
| H | 4.733233000  | -5.183968000 | -4.896294000 |
| H | -4.735066000 | -5.010618000 | -5.040123000 |
| H | 7.712705000  | -2.876892000 | -2.802815000 |
| H | -7.662934000 | -2.508873000 | -3.102601000 |
| H | 5.876834000  | 2.121370000  | -0.950483000 |
| H | -5.916403000 | 1.927439000  | -1.137588000 |
| H | 2.942611000  | 4.429831000  | -3.067728000 |
| H | -2.973315000 | 4.396936000  | -3.052182000 |
| H | 4.750298000  | 5.820470000  | -4.081331000 |
| H | -4.780808000 | 5.826620000  | -4.010882000 |
| H | 7.701541000  | 3.507747000  | -1.955804000 |
| H | -7.740765000 | 3.340773000  | -2.103026000 |
| H | -7.084656000 | -4.222447000 | -4.811324000 |
| H | 7.114878000  | -4.553611000 | -4.540799000 |
| H | -7.164299000 | 5.291265000  | -3.536676000 |
| H | 7.129810000  | 5.356026000  | -3.520769000 |
| H | -1.932701000 | -2.938498000 | 0.596723000  |



|    |              |              |              |
|----|--------------|--------------|--------------|
| H  | -0.871570000 | 1.374089000  | 5.090279000  |
| H  | -0.012594000 | 0.069203000  | 4.786214000  |
| H  | 0.008862000  | 3.987243000  | 0.568600000  |
| H  | 0.639456000  | 4.301850000  | 2.623545000  |
| H  | 0.924926000  | 4.229153000  | -0.695666000 |
| H  | 1.962919000  | -0.177467000 | 3.568253000  |
| H  | -1.942580000 | 2.777845000  | 0.796459000  |
| H  | -0.609047000 | -1.997758000 | 5.100180000  |
| H  | 0.888475000  | -4.453831000 | 2.187806000  |
| H  | 0.657686000  | -4.467966000 | -1.157507000 |
| H  | 0.031208000  | -4.160592000 | 0.880236000  |
| O  | -1.059574000 | -0.100864000 | 2.172915000  |
| O  | -3.615465000 | 1.288798000  | 2.164163000  |
| O  | -3.610117000 | 1.328374000  | -0.642938000 |
| O  | -3.609300000 | -1.506358000 | 2.085619000  |
| O  | -2.048666000 | -2.655352000 | 3.232304000  |
| O  | 0.040255000  | -4.088660000 | 1.900841000  |
| O  | 2.075817000  | -2.831660000 | 2.993548000  |
| O  | 2.066199000  | -2.621870000 | -1.792226000 |
| O  | 3.631533000  | -1.528870000 | 2.020573000  |
| O  | 3.612825000  | -1.419701000 | -0.700542000 |
| O  | 3.643748000  | 1.279350000  | 2.102575000  |
| O  | 3.581682000  | 1.391712000  | -0.615376000 |
| O  | 2.025234000  | 2.681260000  | -1.584300000 |
| O  | 2.096056000  | 2.452612000  | 3.240854000  |
| O  | 1.060938000  | 1.402770000  | 0.733830000  |
| O  | 1.407530000  | -0.123082000 | 2.780716000  |
| O  | 0.036058000  | -1.516776000 | 4.570128000  |
| O  | -0.026955000 | 1.087779000  | 4.716207000  |
| O  | 1.062582000  | -1.551384000 | 0.694808000  |
| O  | -1.387670000 | -2.146062000 | 0.678550000  |
| O  | -2.049137000 | -2.446110000 | -1.936907000 |
| O  | -0.006149000 | -3.950405000 | -0.688611000 |
| O  | -3.613436000 | -1.420081000 | -0.699885000 |
| O  | -0.021413000 | 3.776720000  | 2.158857000  |
| O  | 0.041599000  | 3.920200000  | -0.448483000 |
| O  | -1.394448000 | 1.984286000  | 0.759704000  |
| O  | -2.046419000 | 2.252196000  | 3.456712000  |
| O  | -2.063543000 | 2.477740000  | -1.785843000 |
| O  | 1.369598000  | -0.037735000 | -1.342671000 |
| O  | -1.091077000 | -0.060223000 | -0.811710000 |
| H  | 1.910060000  | -0.061879000 | -2.157742000 |
| O  | 0.107280000  | 1.717383000  | -3.229683000 |
| H  | 0.338007000  | 2.593380000  | -3.563461000 |
| Hf | 2.522935000  | -0.077510000 | 0.693027000  |
| Hf | -0.015260000 | -1.875478000 | 2.499191000  |

|    |              |              |              |
|----|--------------|--------------|--------------|
| Hf | 0.030577000  | 1.707205000  | 2.508935000  |
| Hf | -0.025564000 | 1.695223000  | -1.070237000 |
| Hf | -2.533706000 | -0.081603000 | 0.708227000  |
| Hf | 0.022542000  | -1.881254000 | -1.076840000 |
| C  | -1.692883000 | -1.836096000 | -5.359583000 |
| C  | -0.227489000 | -2.256398000 | -5.528218000 |
| C  | 0.567566000  | -1.545446000 | -4.453417000 |
| C  | -1.836456000 | -0.311868000 | -5.459085000 |
| C  | 1.889338000  | -0.910621000 | -4.775524000 |
| C  | -2.744430000 | 0.236349000  | -4.371178000 |
| H  | 2.640076000  | -1.721926000 | -4.705625000 |
| H  | 0.141416000  | -1.942653000 | -6.527650000 |
| H  | -1.985024000 | -2.173588000 | -4.350317000 |
| H  | -2.245192000 | 2.009540000  | -3.790305000 |
| H  | 1.882715000  | -0.584702000 | -5.829656000 |
| H  | 1.517804000  | 0.755932000  | -3.820797000 |
| H  | -2.348867000 | -0.091018000 | -3.387055000 |
| H  | -3.743252000 | -0.224616000 | -4.479365000 |
| H  | -0.928479000 | -4.022743000 | -5.687077000 |
| H  | -0.484242000 | 0.878902000  | -4.604334000 |
| H  | -2.398734000 | -2.208742000 | -7.128989000 |
| H  | -2.265242000 | -0.054897000 | -6.449248000 |
| O  | -2.510048000 | -2.571907000 | -6.240297000 |
| O  | 2.261328000  | 0.106267000  | -3.899093000 |
| O  | -2.854659000 | 1.628923000  | -4.442488000 |
| O  | 0.146516000  | -1.608719000 | -3.298262000 |
| O  | -0.103920000 | -3.641674000 | -5.347536000 |
| O  | -0.546337000 | 0.268096000  | -5.383578000 |

## Hf-NU-1000 Int2\_Ro

|   |              |              |              |
|---|--------------|--------------|--------------|
| C | -3.248200000 | -2.182800000 | -1.650100000 |
| C | -3.229700000 | -2.386600000 | 2.900000000  |
| C | -3.232300000 | 2.034300000  | 3.104000000  |
| C | 3.276900000  | 2.142000000  | 2.939200000  |
| C | 3.226900000  | 2.366300000  | -1.338700000 |
| C | 3.259300000  | -2.277900000 | -1.561500000 |
| C | -3.265300000 | 2.236100000  | -1.457300000 |
| C | 3.257200000  | -2.506600000 | 2.716400000  |
| H | 4.086486000  | 2.699664000  | 3.459201000  |
| H | 4.061838000  | -3.140990000 | 3.150129000  |
| H | -4.031754000 | 2.551634000  | 3.679518000  |
| H | -4.031174000 | -2.968585000 | 3.405253000  |
| C | 5.681530000  | -2.691644000 | -2.054886000 |
| C | -5.657325000 | -2.578074000 | -2.231054000 |
| C | 4.335714000  | -2.956923000 | -2.337468000 |
| C | -4.314706000 | -2.960207000 | -2.343938000 |

|   |              |              |              |
|---|--------------|--------------|--------------|
| C | 4.009125000  | -3.855070000 | -3.362300000 |
| C | -3.972238000 | -4.074847000 | -3.121454000 |
| C | 5.015505000  | -4.479282000 | -4.094016000 |
| C | -4.962384000 | -4.795706000 | -3.781705000 |
| C | 6.355041000  | -4.212581000 | -3.805819000 |
| C | -6.298238000 | -4.401632000 | -3.679432000 |
| C | 6.686242000  | -3.318984000 | -2.786185000 |
| C | -6.644516000 | -3.292805000 | -2.905461000 |
| C | 5.640303000  | 2.939719000  | -1.703992000 |
| C | -5.691364000 | 2.778638000  | -1.818845000 |
| C | 4.292088000  | 3.165637000  | -2.007774000 |
| C | -4.346424000 | 3.015847000  | -2.135174000 |
| C | 3.950160000  | 4.141334000  | -2.952654000 |
| C | -4.024131000 | 3.964551000  | -3.113751000 |
| C | 4.944500000  | 4.884512000  | -3.582498000 |
| C | -5.034211000 | 4.654357000  | -3.780782000 |
| C | 6.286312000  | 4.661072000  | -3.269716000 |
| C | -6.372325000 | 4.405257000  | -3.471251000 |
| C | 6.632651000  | 3.688576000  | -2.330308000 |
| C | -6.699540000 | 3.469864000  | -2.486832000 |
| H | 5.918387000  | -1.986823000 | -1.255734000 |
| H | -5.902732000 | -1.709012000 | -1.617278000 |
| H | 2.955666000  | -4.051858000 | -3.574613000 |
| H | -2.918931000 | -4.355438000 | -3.196986000 |
| H | 4.756432000  | -5.178466000 | -4.892470000 |
| H | -4.693682000 | -5.666503000 | -4.383854000 |
| H | 7.734740000  | -3.110027000 | -2.562048000 |
| H | -7.690203000 | -2.986874000 | -2.826045000 |
| H | 5.889043000  | 2.170739000  | -0.970145000 |
| H | -5.922538000 | 2.037337000  | -1.050766000 |
| H | 2.895237000  | 4.294190000  | -3.190784000 |
| H | -2.970342000 | 4.146048000  | -3.337429000 |
| H | 4.674620000  | 5.640766000  | -4.323327000 |
| H | -4.778884000 | 5.393317000  | -4.543851000 |
| H | 7.683224000  | 3.513096000  | -2.087500000 |
| H | -7.746598000 | 3.280772000  | -2.239305000 |
| H | -7.074127000 | -4.963330000 | -4.205286000 |
| H | 7.144859000  | -4.703564000 | -4.379568000 |
| H | -7.164051000 | 4.945806000  | -3.995365000 |
| H | 7.066517000  | 5.246248000  | -3.762745000 |
| H | -1.929931000 | -2.930991000 | 0.568452000  |
| H | -0.880894000 | 1.344129000  | 5.089049000  |
| H | -0.015794000 | 0.045067000  | 4.780944000  |
| H | 0.018446000  | 4.014945000  | 0.608534000  |
| H | 0.660959000  | 4.285537000  | 2.666502000  |
| H | 0.865782000  | 4.314334000  | -0.699301000 |

|    |              |              |              |
|----|--------------|--------------|--------------|
| H  | 1.960541000  | -0.198966000 | 3.567072000  |
| H  | -1.940684000 | 2.795782000  | 0.832546000  |
| H  | -0.607625000 | -2.028740000 | 5.074858000  |
| H  | 0.893170000  | -4.445374000 | 2.115682000  |
| H  | 0.680507000  | -4.397905000 | -1.207472000 |
| H  | 0.030920000  | -4.132414000 | 0.815831000  |
| O  | -1.063328000 | -0.103709000 | 2.174225000  |
| O  | -3.618265000 | 1.289120000  | 2.165527000  |
| O  | -3.627073000 | 1.379890000  | -0.599699000 |
| O  | -3.610116000 | -1.510048000 | 2.081266000  |
| O  | -2.046534000 | -2.668964000 | 3.213649000  |
| O  | 0.040826000  | -4.082599000 | 1.837581000  |
| O  | 2.073355000  | -2.845388000 | 2.969573000  |
| O  | 2.060549000  | -2.571967000 | -1.842623000 |
| O  | 3.633258000  | -1.525132000 | 2.027784000  |
| O  | 3.611622000  | -1.437066000 | -0.685455000 |
| O  | 3.645198000  | 1.281383000  | 2.102181000  |
| O  | 3.596737000  | 1.392005000  | -0.617515000 |
| O  | 2.026801000  | 2.704630000  | -1.532254000 |
| O  | 2.097492000  | 2.440682000  | 3.256924000  |
| O  | 1.068383000  | 1.410408000  | 0.753570000  |
| O  | 1.407698000  | -0.134578000 | 2.778584000  |
| O  | 0.037760000  | -1.540582000 | 4.551866000  |
| O  | -0.031406000 | 1.064100000  | 4.721506000  |
| O  | 1.059058000  | -1.542481000 | 0.673670000  |
| O  | -1.395760000 | -2.130881000 | 0.646012000  |
| O  | -2.052396000 | -2.387140000 | -1.990542000 |
| O  | -0.012407000 | -3.903611000 | -0.755623000 |
| O  | -3.619794000 | -1.376778000 | -0.739382000 |
| O  | -0.012590000 | 3.778728000  | 2.199664000  |
| O  | 0.012802000  | 3.962375000  | -0.408680000 |
| O  | -1.393413000 | 2.003107000  | 0.775584000  |
| O  | -2.048246000 | 2.245824000  | 3.463561000  |
| O  | -2.075196000 | 2.480432000  | -1.794469000 |
| O  | 1.381456000  | -0.003498000 | -1.334865000 |
| O  | -1.090516000 | -0.025640000 | -0.798812000 |
| H  | 1.901912000  | 0.005106000  | -2.163979000 |
| O  | 0.137227000  | 1.756925000  | -3.135047000 |
| H  | -0.617716000 | 1.815053000  | -3.728651000 |
| Hf | 2.525442000  | -0.065813000 | 0.689543000  |
| Hf | -0.015791000 | -1.878334000 | 2.475445000  |
| Hf | 0.035966000  | 1.702390000  | 2.517052000  |
| Hf | -0.023664000 | 1.751738000  | -1.060703000 |
| Hf | -2.529702000 | -0.068182000 | 0.704216000  |
| Hf | 0.023210000  | -1.821688000 | -1.106282000 |
| C  | -1.565633000 | -0.425591000 | -5.852891000 |

|   |              |              |              |
|---|--------------|--------------|--------------|
| C | -0.478456000 | -1.510650000 | -5.668498000 |
| C | 0.424669000  | -1.115012000 | -4.508312000 |
| C | -2.623025000 | -0.465637000 | -4.751399000 |
| C | 1.687298000  | -0.381059000 | -4.860585000 |
| C | -3.536826000 | 0.743313000  | -4.736423000 |
| H | 2.401720000  | -1.187897000 | -5.125785000 |
| H | 0.143874000  | -1.490083000 | -6.583382000 |
| H | -2.083069000 | -0.652694000 | -6.805241000 |
| H | -5.120515000 | 1.185278000  | -3.678464000 |
| H | 1.503525000  | 0.162345000  | -5.807819000 |
| H | 1.524201000  | 1.105405000  | -3.676623000 |
| H | -3.933839000 | 0.936986000  | -5.756629000 |
| H | -2.972352000 | 1.639882000  | -4.413323000 |
| H | -1.886703000 | -2.725023000 | -5.122535000 |
| H | -4.122973000 | -1.641191000 | -4.380343000 |
| H | -1.456025000 | 1.443821000  | -6.406478000 |
| H | -2.138360000 | -0.522756000 | -3.753382000 |
| O | -0.909816000 | 0.826973000  | -5.907917000 |
| O | 2.232733000  | 0.419506000  | -3.878119000 |
| O | -4.561509000 | 0.414866000  | -3.835850000 |
| O | 0.115713000  | -1.435979000 | -3.369218000 |
| O | -0.996458000 | -2.787733000 | -5.515526000 |
| O | -3.379318000 | -1.634299000 | -5.002654000 |

## Hf-NU-1000 TS3

|   |              |              |              |
|---|--------------|--------------|--------------|
| C | -3.248563000 | -2.182400000 | -1.650041000 |
| C | -3.229700000 | -2.386600000 | 2.900000000  |
| C | -3.232300000 | 2.034300000  | 3.104000000  |
| C | 3.276900000  | 2.142000000  | 2.939200000  |
| C | 3.226900000  | 2.366300000  | -1.338700000 |
| C | 3.258923000  | -2.278209000 | -1.561151000 |
| C | -3.265300000 | 2.236100000  | -1.457300000 |
| C | 3.257200000  | -2.506600000 | 2.716400000  |
| H | 4.088455000  | 2.715250000  | 3.439208000  |
| H | 4.062442000  | -3.144395000 | 3.143533000  |
| H | -4.031701000 | 2.573228000  | 3.659047000  |
| H | -4.032717000 | -2.982762000 | 3.386034000  |
| C | 5.677003000  | -2.611137000 | -2.141090000 |
| C | -5.473195000 | -1.805716000 | -2.712810000 |
| C | 4.331887000  | -2.930877000 | -2.363739000 |
| C | -4.336268000 | -2.613062000 | -2.571597000 |
| C | 3.998520000  | -3.864396000 | -3.354129000 |
| C | -4.208839000 | -3.769913000 | -3.348534000 |
| C | 4.997562000  | -4.470093000 | -4.110669000 |
| C | -5.204519000 | -4.112301000 | -4.259602000 |
| C | 6.336755000  | -4.149158000 | -3.882219000 |

|   |              |              |              |
|---|--------------|--------------|--------------|
| C | -6.320687000 | -3.290542000 | -4.416639000 |
| C | 6.674756000  | -3.219713000 | -2.897509000 |
| C | -6.453394000 | -2.136048000 | -3.643227000 |
| C | 5.633448000  | 2.979416000  | -1.647317000 |
| C | -5.656712000 | 2.380843000  | -2.192830000 |
| C | 4.287495000  | 3.203782000  | -1.964503000 |
| C | -4.326652000 | 2.792740000  | -2.345251000 |
| C | 3.952105000  | 4.218538000  | -2.869968000 |
| C | -3.994024000 | 3.678517000  | -3.377583000 |
| C | 4.948310000  | 4.999245000  | -3.448941000 |
| C | -4.975400000 | 4.139749000  | -4.250894000 |
| C | 6.287121000  | 4.773224000  | -3.125828000 |
| C | -6.297573000 | 3.717203000  | -4.100345000 |
| C | 6.627974000  | 3.763098000  | -2.225028000 |
| C | -6.637172000 | 2.839611000  | -3.068853000 |
| H | 5.919590000  | -1.879754000 | -1.367970000 |
| H | -5.555002000 | -0.908027000 | -2.095667000 |
| H | 2.944833000  | -4.100054000 | -3.521103000 |
| H | -3.324085000 | -4.398890000 | -3.232531000 |
| H | 4.733181000  | -5.196325000 | -4.882750000 |
| H | -5.102874000 | -5.018965000 | -4.859921000 |
| H | 7.722954000  | -2.968272000 | -2.720322000 |
| H | -7.324279000 | -1.487991000 | -3.771744000 |
| H | 5.878505000  | 2.183033000  | -0.942152000 |
| H | -5.900698000 | 1.694870000  | -1.379417000 |
| H | 2.900657000  | 4.377801000  | -3.117162000 |
| H | -2.954732000 | 3.997780000  | -3.480705000 |
| H | 4.682376000  | 5.786844000  | -4.157641000 |
| H | -4.711092000 | 4.833001000  | -5.052917000 |
| H | 7.676092000  | 3.585958000  | -1.973620000 |
| H | -7.673491000 | 2.516361000  | -2.944510000 |
| H | -7.089999000 | -3.549072000 | -5.148135000 |
| H | 7.120936000  | -4.625368000 | -4.475825000 |
| H | -7.068096000 | 4.081131000  | -4.784745000 |
| H | 7.069049000  | 5.386621000  | -3.579998000 |
| H | -1.926006000 | -2.924659000 | 0.598790000  |
| H | -0.881571000 | 1.314297000  | 5.141537000  |
| H | -0.016866000 | 0.014213000  | 4.811220000  |
| H | 0.053011000  | 4.008861000  | 0.675325000  |
| H | 0.667434000  | 4.269842000  | 2.722579000  |
| H | 0.979056000  | 4.252374000  | -0.590404000 |
| H | 1.967251000  | -0.205239000 | 3.594991000  |
| H | -1.917951000 | 2.797837000  | 0.840535000  |
| H | -0.616951000 | -2.036113000 | 5.083009000  |
| H | 0.877236000  | -4.470557000 | 2.174972000  |
| H | 0.716162000  | -4.426464000 | -1.130113000 |

|    |              |              |              |
|----|--------------|--------------|--------------|
| H  | 0.039508000  | -4.146105000 | 0.853888000  |
| O  | -1.056939000 | -0.102975000 | 2.197811000  |
| O  | -3.615748000 | 1.286168000  | 2.169125000  |
| O  | -3.620108000 | 1.384623000  | -0.589391000 |
| O  | -3.611441000 | -1.502029000 | 2.090311000  |
| O  | -2.049697000 | -2.659912000 | 3.227158000  |
| O  | 0.039182000  | -4.087318000 | 1.883204000  |
| O  | 2.076456000  | -2.835696000 | 2.983475000  |
| O  | 2.070212000  | -2.624840000 | -1.774869000 |
| O  | 3.638321000  | -1.530315000 | 2.021001000  |
| O  | 3.618321000  | -1.402340000 | -0.712458000 |
| O  | 3.642020000  | 1.277588000  | 2.105941000  |
| O  | 3.591550000  | 1.416420000  | -0.594627000 |
| O  | 2.012483000  | 2.660227000  | -1.591300000 |
| O  | 2.100439000  | 2.430684000  | 3.278275000  |
| O  | 1.079824000  | 1.407367000  | 0.786974000  |
| O  | 1.414837000  | -0.137554000 | 2.806519000  |
| O  | 0.036865000  | -1.548741000 | 4.569553000  |
| O  | -0.035474000 | 1.039144000  | 4.762688000  |
| O  | 1.070372000  | -1.526522000 | 0.691851000  |
| O  | -1.381764000 | -2.132247000 | 0.682946000  |
| O  | -2.072885000 | -2.557260000 | -1.899982000 |
| O  | 0.017448000  | -3.936783000 | -0.682566000 |
| O  | -3.579396000 | -1.401135000 | -0.703452000 |
| O  | -0.004051000 | 3.766886000  | 2.248248000  |
| O  | 0.093715000  | 3.949025000  | -0.344906000 |
| O  | -1.372348000 | 2.001961000  | 0.830115000  |
| O  | -2.051297000 | 2.228343000  | 3.487006000  |
| O  | -2.067176000 | 2.591453000  | -1.667428000 |
| O  | 1.367407000  | 0.005665000  | -1.348813000 |
| O  | -1.093179000 | -0.020678000 | -0.770164000 |
| H  | 1.834540000  | -0.018768000 | -2.207481000 |
| O  | -0.132426000 | 1.627371000  | -3.197594000 |
| H  | -0.383418000 | 2.489115000  | -3.554776000 |
| Hf | 2.540104000  | -0.091354000 | 0.695065000  |
| Hf | -0.005601000 | -1.884248000 | 2.486820000  |
| Hf | 0.036097000  | 1.686597000  | 2.575163000  |
| Hf | -0.013084000 | 1.724274000  | -0.949073000 |
| Hf | -2.530888000 | -0.077874000 | 0.732563000  |
| Hf | 0.015787000  | -1.862346000 | -1.107251000 |
| C  | -1.909111000 | -0.057257000 | -5.048831000 |
| C  | -0.662305000 | -2.209875000 | -5.266540000 |
| C  | 0.244506000  | -1.562633000 | -4.454245000 |
| C  | -3.082394000 | -0.672064000 | -5.730596000 |
| C  | 1.479358000  | -0.871502000 | -4.977891000 |
| C  | -4.285258000 | 0.258309000  | -5.608241000 |

|   |              |              |              |
|---|--------------|--------------|--------------|
| H | 2.286278000  | -1.621182000 | -5.054715000 |
| H | -0.578660000 | -2.246671000 | -6.353771000 |
| H | -1.177109000 | 0.465430000  | -5.696647000 |
| H | -6.050013000 | 0.275124000  | -6.416646000 |
| H | 1.304958000  | -0.514380000 | -6.012484000 |
| H | 1.255619000  | 0.785890000  | -3.967040000 |
| H | -4.021564000 | 1.263500000  | -5.994131000 |
| H | -4.556944000 | 0.367043000  | -4.541708000 |
| H | -1.613859000 | -2.908291000 | -3.775304000 |
| H | -3.603194000 | -1.092584000 | -7.512016000 |
| H | -1.052591000 | 0.921632000  | -3.456385000 |
| H | -3.340246000 | -1.617702000 | -5.205223000 |
| O | -1.993670000 | 0.213870000  | -3.819779000 |
| O | 1.971620000  | 0.140919000  | -4.138063000 |
| O | -5.307241000 | -0.335128000 | -6.373843000 |
| O | 0.051527000  | -1.581536000 | -3.179218000 |
| O | -1.593183000 | -3.033861000 | -4.750594000 |
| O | -2.762558000 | -0.895370000 | -7.077463000 |

## Hf-NU-1000 Int3

|   |              |              |              |
|---|--------------|--------------|--------------|
| C | -3.248200000 | -2.182800000 | -1.650100000 |
| C | -3.229700000 | -2.386600000 | 2.900000000  |
| C | -3.232300000 | 2.034300000  | 3.104000000  |
| C | 3.276900000  | 2.142000000  | 2.939200000  |
| C | 3.226900000  | 2.366300000  | -1.338700000 |
| C | 3.259300000  | -2.277900000 | -1.561500000 |
| C | -3.265300000 | 2.236100000  | -1.457300000 |
| C | 3.257200000  | -2.506600000 | 2.716400000  |
| H | 4.084915000  | 2.703231000  | 3.457695000  |
| H | 4.061046000  | -3.128639000 | 3.167920000  |
| H | -4.029154000 | 2.552680000  | 3.681390000  |
| H | -4.029896000 | -2.969308000 | 3.406200000  |
| C | 5.689881000  | -2.595365000 | -2.098762000 |
| C | -5.666770000 | -2.467377000 | -2.249168000 |
| C | 4.356444000  | -2.976027000 | -2.292843000 |
| C | -4.334490000 | -2.871865000 | -2.402904000 |
| C | 4.058854000  | -4.018565000 | -3.180927000 |
| C | -4.021861000 | -3.907279000 | -3.292630000 |
| C | 5.080808000  | -4.671997000 | -3.863174000 |
| C | -5.029626000 | -4.533414000 | -4.019325000 |
| C | 6.408117000  | -4.287437000 | -3.665319000 |
| C | -6.354211000 | -4.118428000 | -3.874130000 |
| C | 6.710716000  | -3.248640000 | -2.783978000 |
| C | -6.671743000 | -3.083910000 | -2.990793000 |
| C | 5.641778000  | 2.940959000  | -1.648943000 |
| C | -5.660797000 | 2.954888000  | -1.599700000 |



|   |              |              |              |
|---|--------------|--------------|--------------|
| C | 4.298614000  | 3.202853000  | -1.948697000 |
| C | -4.327656000 | 3.139203000  | -1.990088000 |
| C | 3.980582000  | 4.251750000  | -2.820922000 |
| C | -4.005277000 | 4.171507000  | -2.878927000 |
| C | 4.989184000  | 5.027396000  | -3.385177000 |
| C | -5.004682000 | 4.995160000  | -3.390338000 |
| C | 6.325027000  | 4.761039000  | -3.081518000 |
| C | -6.333468000 | 4.797236000  | -3.011418000 |
| C | 6.649324000  | 3.717590000  | -2.213308000 |
| C | -6.659876000 | 3.779980000  | -2.111500000 |
| H | 5.905102000  | -1.781288000 | -1.404417000 |
| H | -5.889919000 | -1.652807000 | -1.558126000 |
| H | 3.013849000  | -4.300924000 | -3.329680000 |
| H | -2.978213000 | -4.207534000 | -3.406898000 |
| H | 4.843317000  | -5.484262000 | -4.553903000 |
| H | -4.781130000 | -5.339743000 | -4.712488000 |
| H | 7.749504000  | -2.947203000 | -2.630983000 |
| H | -7.709020000 | -2.759375000 | -2.879303000 |
| H | 5.874252000  | 2.119864000  | -0.968475000 |
| H | -5.890734000 | 2.149863000  | -0.898458000 |
| H | 2.931678000  | 4.447894000  | -3.052532000 |
| H | -2.960655000 | 4.307811000  | -3.166247000 |
| H | 4.735118000  | 5.842931000  | -4.066066000 |
| H | -4.748892000 | 5.796342000  | -4.087298000 |
| H | 7.694985000  | 3.508874000  | -1.976526000 |
| H | -7.698397000 | 3.634466000  | -1.804686000 |
| H | -7.144334000 | -4.602508000 | -4.453423000 |
| H | 7.210410000  | -4.799775000 | -4.201870000 |
| H | -7.117813000 | 5.442978000  | -3.413376000 |
| H | 7.117058000  | 5.369447000  | -3.524615000 |
| H | -1.936756000 | -2.925670000 | 0.574923000  |
| H | -0.866663000 | 1.310116000  | 5.120695000  |
| H | -0.015420000 | 0.004092000  | 4.766496000  |
| H | 0.020841000  | 3.994286000  | 0.603756000  |
| H | 0.650907000  | 4.280438000  | 2.642627000  |
| H | 0.933884000  | 4.243642000  | -0.667459000 |
| H | 1.957687000  | -0.206761000 | 3.556720000  |
| H | -1.929867000 | 2.801996000  | 0.817017000  |
| H | -0.608882000 | -2.038925000 | 5.037576000  |
| H | 0.884959000  | -4.465839000 | 2.090646000  |
| H | 0.621438000  | -4.449188000 | -1.224842000 |
| H | 0.028130000  | -4.132575000 | 0.780590000  |
| O | -1.059600000 | -0.098696000 | 2.163853000  |
| O | -3.616936000 | 1.295946000  | 2.160684000  |
| O | -3.623409000 | 1.347748000  | -0.634072000 |
| O | -3.615297000 | -1.500793000 | 2.091864000  |

|    |              |              |              |
|----|--------------|--------------|--------------|
| O  | -2.045798000 | -2.673012000 | 3.200564000  |
| O  | 0.042100000  | -4.083507000 | 1.812059000  |
| O  | 2.073501000  | -2.843956000 | 2.961505000  |
| O  | 2.078685000  | -2.631306000 | -1.791240000 |
| O  | 3.637274000  | -1.535235000 | 2.011931000  |
| O  | 3.606574000  | -1.375416000 | -0.735087000 |
| O  | 3.641444000  | 1.277737000  | 2.106003000  |
| O  | 3.579203000  | 1.422699000  | -0.586670000 |
| O  | 2.015385000  | 2.658420000  | -1.620862000 |
| O  | 2.094466000  | 2.442027000  | 3.255441000  |
| O  | 1.061811000  | 1.417802000  | 0.753765000  |
| O  | 1.408229000  | -0.135402000 | 2.766364000  |
| O  | 0.038296000  | -1.545372000 | 4.521777000  |
| O  | -0.029729000 | 1.032277000  | 4.724715000  |
| O  | 1.061023000  | -1.530852000 | 0.648223000  |
| O  | -1.400571000 | -2.126059000 | 0.640555000  |
| O  | -2.062980000 | -2.413146000 | -1.992475000 |
| O  | -0.030269000 | -3.922312000 | -0.750055000 |
| O  | -3.605950000 | -1.395528000 | -0.715846000 |
| O  | -0.018511000 | 3.767622000  | 2.175797000  |
| O  | 0.051503000  | 3.933114000  | -0.419146000 |
| O  | -1.394749000 | 1.999987000  | 0.772906000  |
| O  | -2.046176000 | 2.240654000  | 3.467024000  |
| O  | -2.065785000 | 2.443383000  | -1.822500000 |
| O  | 1.371617000  | 0.017184000  | -1.363506000 |
| O  | -1.092554000 | -0.027240000 | -0.804613000 |
| H  | 1.901670000  | 0.016638000  | -2.193048000 |
| O  | 0.103567000  | 1.723579000  | -3.329120000 |
| H  | 0.225554000  | 2.605572000  | -3.703508000 |
| Hf | 2.524066000  | -0.096937000 | 0.682824000  |
| Hf | -0.009284000 | -1.889623000 | 2.434976000  |
| Hf | 0.026384000  | 1.691474000  | 2.541798000  |
| Hf | -0.013962000 | 1.695506000  | -0.989769000 |
| Hf | -2.536648000 | -0.091109000 | 0.704944000  |
| Hf | 0.016226000  | -1.851152000 | -1.199902000 |
| C  | -2.379031000 | 0.074061000  | -5.591634000 |
| C  | -0.073327000 | -1.849145000 | -5.520187000 |
| C  | 0.678300000  | -1.522030000 | -4.444707000 |
| C  | -3.503952000 | -0.275385000 | -4.661273000 |
| C  | 2.117057000  | -1.145944000 | -4.580444000 |
| C  | -4.376123000 | 0.957346000  | -4.480567000 |
| H  | 2.781415000  | -1.919599000 | -4.169006000 |
| H  | 0.267286000  | -1.810497000 | -6.554278000 |
| H  | -2.508403000 | -0.280952000 | -6.639374000 |
| H  | -6.000818000 | 1.344639000  | -3.490831000 |
| H  | 2.370576000  | -1.051878000 | -5.651494000 |

|   |              |              |              |
|---|--------------|--------------|--------------|
| H | 1.763329000  | 0.704250000  | -4.062407000 |
| H | -4.752113000 | 1.285601000  | -5.470889000 |
| H | -3.756621000 | 1.776214000  | -4.072224000 |
| H | -1.523585000 | -2.270009000 | -4.402069000 |
| H | -5.014136000 | -1.450815000 | -4.645521000 |
| H | -0.617970000 | 1.314010000  | -3.883996000 |
| H | -3.059945000 | -0.520291000 | -3.668493000 |
| O | -1.453623000 | 0.806309000  | -5.283282000 |
| O | 2.451861000  | 0.047909000  | -3.872557000 |
| O | -5.423705000 | 0.583940000  | -3.625915000 |
| O | 0.101869000  | -1.558275000 | -3.247971000 |
| O | -1.377656000 | -2.204220000 | -5.368206000 |
| O | -4.232633000 | -1.333636000 | -5.204417000 |

## Hf-NU-1000 TS4

|   |              |              |              |
|---|--------------|--------------|--------------|
| C | -3.248200000 | -2.182800000 | -1.650100000 |
| C | -3.229700000 | -2.386600000 | 2.900000000  |
| C | -3.232300000 | 2.034300000  | 3.104000000  |
| C | 3.276900000  | 2.142000000  | 2.939200000  |
| C | 3.226900000  | 2.366300000  | -1.338700000 |
| C | 3.259300000  | -2.277900000 | -1.561500000 |
| C | -3.265300000 | 2.236100000  | -1.457300000 |
| C | 3.257200000  | -2.506600000 | 2.716400000  |
| H | 4.086202000  | 2.688023000  | 3.471498000  |
| H | 4.064272000  | -3.142347000 | 3.143543000  |
| H | -4.032421000 | 2.536944000  | 3.690738000  |
| H | -4.031687000 | -2.985019000 | 3.384997000  |
| C | 5.601585000  | -2.293364000 | -2.475348000 |
| C | -5.648742000 | -2.317131000 | -2.344808000 |
| C | 4.291964000  | -2.790685000 | -2.513662000 |
| C | -4.327230000 | -2.753596000 | -2.503590000 |
| C | 3.941164000  | -3.737781000 | -3.485409000 |
| C | -4.020768000 | -3.693735000 | -3.495122000 |
| C | 4.887504000  | -4.180946000 | -4.406207000 |
| C | -5.026993000 | -4.200440000 | -4.311805000 |
| C | 6.190637000  | -3.681537000 | -4.363326000 |
| C | -6.342554000 | -3.761315000 | -4.152771000 |
| C | 6.546135000  | -2.738215000 | -3.397724000 |
| C | -6.652258000 | -2.816027000 | -3.171944000 |
| C | 5.628138000  | 3.057350000  | -1.534647000 |
| C | -5.684641000 | 2.843487000  | -1.635212000 |
| C | 4.293562000  | 3.225625000  | -1.925656000 |
| C | -4.355909000 | 3.088667000  | -2.004248000 |
| C | 3.968157000  | 4.204591000  | -2.873233000 |
| C | -4.058763000 | 4.154716000  | -2.863237000 |
| C | 4.965628000  | 5.006423000  | -3.421092000 |

|   |              |              |              |
|---|--------------|--------------|--------------|
| C | -5.081482000 | 4.961396000  | -3.352355000 |
| C | 6.292878000  | 4.839676000  | -3.022387000 |
| C | -6.405834000 | 4.712419000  | -2.983373000 |
| C | 6.622737000  | 3.865279000  | -2.078855000 |
| C | -6.705806000 | 3.655277000  | -2.122413000 |
| H | 5.857102000  | -1.554134000 | -1.713050000 |
| H | -5.868100000 | -1.568488000 | -1.580731000 |
| H | 2.913904000  | -4.110160000 | -3.504749000 |
| H | -2.983385000 | -4.013703000 | -3.613337000 |
| H | 4.610483000  | -4.920387000 | -5.161279000 |
| H | -4.785935000 | -4.934803000 | -5.083383000 |
| H | 7.566158000  | -2.348741000 | -3.363981000 |
| H | -7.678136000 | -2.458448000 | -3.057598000 |
| H | 5.863628000  | 2.288347000  | -0.796054000 |
| H | -5.897361000 | 2.008024000  | -0.965785000 |
| H | 2.925259000  | 4.313548000  | -3.178298000 |
| H | -3.019525000 | 4.330371000  | -3.143514000 |
| H | 4.709269000  | 5.765190000  | -4.164028000 |
| H | -4.847939000 | 5.789829000  | -4.024797000 |
| H | 7.661696000  | 3.736593000  | -1.766639000 |
| H | -7.740939000 | 3.465831000  | -1.826346000 |
| H | -7.130520000 | -4.153924000 | -4.800289000 |
| H | 6.932559000  | -4.029673000 | -5.085925000 |
| H | -7.206680000 | 5.351243000  | -3.364675000 |
| H | 7.074693000  | 5.471978000  | -3.450274000 |
| H | -1.935659000 | -2.944779000 | 0.620438000  |
| H | -0.873054000 | 1.379539000  | 5.075578000  |
| H | -0.012515000 | 0.073939000  | 4.781039000  |
| H | 0.031362000  | 3.991153000  | 0.560660000  |
| H | 0.650151000  | 4.294143000  | 2.625519000  |
| H | 0.899801000  | 4.253513000  | -0.741043000 |
| H | 1.963992000  | -0.175222000 | 3.570479000  |
| H | -1.928172000 | 2.780827000  | 0.787635000  |
| H | -0.614115000 | -1.992085000 | 5.093857000  |
| H | 0.893604000  | -4.450140000 | 2.188251000  |
| H | 0.625448000  | -4.488516000 | -1.117695000 |
| H | 0.008635000  | -4.167926000 | 0.893581000  |
| O | -1.059647000 | -0.099320000 | 2.178364000  |
| O | -3.614151000 | 1.295700000  | 2.157874000  |
| O | -3.604108000 | 1.299607000  | -0.667818000 |
| O | -3.608714000 | -1.504374000 | 2.088143000  |
| O | -2.048617000 | -2.655950000 | 3.232691000  |
| O | 0.040284000  | -4.087520000 | 1.914146000  |
| O | 2.076824000  | -2.827554000 | 2.998403000  |
| O | 2.103924000  | -2.756396000 | -1.635410000 |
| O | 3.632787000  | -1.540290000 | 2.003644000  |

|    |              |              |              |
|----|--------------|--------------|--------------|
| O  | 3.625972000  | -1.370054000 | -0.753709000 |
| O  | 3.644800000  | 1.279713000  | 2.101661000  |
| O  | 3.593851000  | 1.386454000  | -0.624884000 |
| O  | 2.023683000  | 2.656763000  | -1.594563000 |
| O  | 2.096567000  | 2.453204000  | 3.239574000  |
| O  | 1.068566000  | 1.391445000  | 0.722736000  |
| O  | 1.413562000  | -0.123062000 | 2.779438000  |
| O  | 0.036839000  | -1.513678000 | 4.568595000  |
| O  | -0.024800000 | 1.092380000  | 4.710187000  |
| O  | 1.065339000  | -1.541529000 | 0.691580000  |
| O  | -1.386636000 | -2.153427000 | 0.681168000  |
| O  | -2.049436000 | -2.412786000 | -1.978879000 |
| O  | -0.059345000 | -3.977402000 | -0.671958000 |
| O  | -3.605818000 | -1.458063000 | -0.673538000 |
| O  | -0.010697000 | 3.773939000  | 2.155362000  |
| O  | 0.038288000  | 3.919197000  | -0.454506000 |
| O  | -1.386571000 | 1.982479000  | 0.753033000  |
| O  | -2.046090000 | 2.254695000  | 3.454666000  |
| O  | -2.072866000 | 2.510900000  | -1.764211000 |
| O  | 1.350351000  | -0.048481000 | -1.411565000 |
| O  | -1.076777000 | -0.075330000 | -0.794436000 |
| H  | 1.941772000  | -0.044301000 | -2.188413000 |
| O  | -0.078096000 | 1.740238000  | -3.230924000 |
| H  | -0.863314000 | 2.230902000  | -3.521470000 |
| Hf | 2.526819000  | -0.079191000 | 0.683804000  |
| Hf | -0.012884000 | -1.871325000 | 2.496828000  |
| Hf | 0.037244000  | 1.704350000  | 2.499917000  |
| Hf | -0.032023000 | 1.699272000  | -1.079583000 |
| Hf | -2.524491000 | -0.084610000 | 0.704775000  |
| Hf | 0.028496000  | -1.911418000 | -1.080209000 |
| C  | -0.560727000 | -0.345094000 | -4.789026000 |
| C  | 0.494082000  | -1.121460000 | -4.277251000 |
| C  | 1.894982000  | -0.934601000 | -4.796536000 |
| H  | 2.267526000  | -1.931123000 | -5.095275000 |
| H  | -0.500333000 | 0.039898000  | -5.814887000 |
| H  | 1.880976000  | -0.297592000 | -5.698080000 |
| H  | 3.620440000  | -0.681645000 | -3.887570000 |
| H  | -1.789905000 | -1.340455000 | -3.694745000 |
| H  | -0.163218000 | 0.672996000  | -4.072358000 |
| O  | 2.712545000  | -0.367737000 | -3.791115000 |
| O  | 0.278964000  | -1.852663000 | -3.267442000 |
| O  | -1.837574000 | -0.660213000 | -4.395280000 |
| C  | -3.430241000 | 1.107248000  | -5.376128000 |
| C  | -4.590428000 | 0.468866000  | -4.652881000 |
| C  | -5.817028000 | 1.359753000  | -4.712615000 |
| H  | -3.140069000 | 0.567430000  | -6.316495000 |

|   |              |              |              |
|---|--------------|--------------|--------------|
| H | -7.598360000 | 1.275873000  | -3.950841000 |
| H | -6.131857000 | 1.465498000  | -5.770321000 |
| H | -5.562951000 | 2.366028000  | -4.334273000 |
| H | -5.592152000 | -1.164265000 | -4.775298000 |
| H | -4.295504000 | 0.377908000  | -3.583361000 |
| O | -2.880820000 | 2.120200000  | -5.017191000 |
| O | -6.810216000 | 0.723807000  | -3.940284000 |
| O | -4.835271000 | -0.778900000 | -5.237575000 |

## Hf-NU-1000 Prod

|   |              |              |              |
|---|--------------|--------------|--------------|
| C | -3.248130000 | -2.182803000 | -1.650070000 |
| C | -3.229697000 | -2.386603000 | 2.899987000  |
| C | -3.232303000 | 2.034299000  | 3.103990000  |
| C | 3.276900000  | 2.142000000  | 2.939202000  |
| C | 3.226892000  | 2.366304000  | -1.338693000 |
| C | 3.259228000  | -2.277902000 | -1.561510000 |
| C | -3.265286000 | 2.236104000  | -1.457304000 |
| C | 3.257196000  | -2.506599000 | 2.716396000  |
| H | 4.085863000  | 2.695839000  | 3.464101000  |
| H | 4.062209000  | -3.146258000 | 3.141723000  |
| H | -4.031889000 | 2.546510000  | 3.683663000  |
| H | -4.030956000 | -2.977000000 | 3.395680000  |
| C | 5.679084000  | -2.613691000 | -2.122849000 |
| C | -5.672506000 | -2.596350000 | -2.107565000 |
| C | 4.336294000  | -2.937387000 | -2.354380000 |
| C | -4.332096000 | -2.920921000 | -2.356482000 |
| C | 4.013958000  | -3.877125000 | -3.342458000 |
| C | -4.023052000 | -3.933996000 | -3.271815000 |
| C | 5.020239000  | -4.484710000 | -4.088069000 |
| C | -5.041634000 | -4.615691000 | -3.930769000 |
| C | 6.356666000  | -4.158161000 | -3.851632000 |
| C | -6.374751000 | -4.284072000 | -3.687085000 |
| C | 6.684108000  | -3.222615000 | -2.869184000 |
| C | -6.689856000 | -3.271874000 | -2.776626000 |
| C | 5.633030000  | 3.018548000  | -1.599395000 |
| C | -5.680537000 | 2.854901000  | -1.695307000 |
| C | 4.292211000  | 3.202773000  | -1.959720000 |
| C | -4.348905000 | 3.042636000  | -2.086150000 |
| C | 3.958865000  | 4.175728000  | -2.910660000 |
| C | -4.041476000 | 3.979575000  | -3.081081000 |
| C | 4.954317000  | 4.956426000  | -3.491371000 |
| C | -5.058333000 | 4.706426000  | -3.693418000 |
| C | 6.288108000  | 4.774138000  | -3.122604000 |
| C | -6.386325000 | 4.511169000  | -3.307224000 |
| C | 6.625957000  | 3.805237000  | -2.176378000 |
| C | -6.695174000 | 3.591434000  | -2.302461000 |

|   |              |              |              |
|---|--------------|--------------|--------------|
| H | 5.913388000  | -1.877847000 | -1.351487000 |
| H | -5.897104000 | -1.797785000 | -1.398045000 |
| H | 2.962849000  | -4.120738000 | -3.513449000 |
| H | -2.975681000 | -4.178351000 | -3.458102000 |
| H | 4.764431000  | -5.218177000 | -4.856289000 |
| H | -4.796022000 | -5.404813000 | -4.644466000 |
| H | 7.730015000  | -2.966706000 | -2.685480000 |
| H | -7.733300000 | -3.007904000 | -2.588542000 |
| H | 5.875450000  | 2.252595000  | -0.860200000 |
| H | -5.898504000 | 2.119504000  | -0.918360000 |
| H | 2.910772000  | 4.297851000  | -3.192426000 |
| H | -2.997342000 | 4.109644000  | -3.372040000 |
| H | 4.691434000  | 5.710160000  | -4.237163000 |
| H | -4.817805000 | 5.429576000  | -4.475871000 |
| H | 7.670276000  | 3.662738000  | -1.889140000 |
| H | -7.733525000 | 3.454715000  | -1.987363000 |
| H | -7.173646000 | -4.815733000 | -4.209905000 |
| H | 7.146725000  | -4.635461000 | -4.436404000 |
| H | -7.183366000 | 5.086076000  | -3.785403000 |
| H | 7.068852000  | 5.389134000  | -3.576903000 |
| H | -1.928408000 | -2.937854000 | 0.592600000  |
| H | -0.876115000 | 1.365215000  | 5.084983000  |
| H | -0.013086000 | 0.064535000  | 4.785687000  |
| H | 0.030628000  | 4.008274000  | 0.593427000  |
| H | 0.653127000  | 4.294497000  | 2.659019000  |
| H | 0.884689000  | 4.304351000  | -0.710849000 |
| H | 1.963547000  | -0.186098000 | 3.571921000  |
| H | -1.934138000 | 2.798562000  | 0.823960000  |
| H | -0.607547000 | -2.014194000 | 5.092361000  |
| H | 0.899370000  | -4.442432000 | 2.129227000  |
| H | 0.665397000  | -4.410662000 | -1.193369000 |
| H | 0.023070000  | -4.138953000 | 0.838673000  |
| O | -1.061113000 | -0.101832000 | 2.181635000  |
| O | -3.618866000 | 1.293213000  | 2.161910000  |
| O | -3.618581000 | 1.336398000  | -0.634815000 |
| O | -3.609310000 | -1.505264000 | 2.087303000  |
| O | -2.046801000 | -2.665412000 | 3.219882000  |
| O | 0.044037000  | -4.082138000 | 1.857080000  |
| O | 2.074196000  | -2.838727000 | 2.981930000  |
| O | 2.062687000  | -2.601321000 | -1.813318000 |
| O | 3.633246000  | -1.527106000 | 2.024979000  |
| O | 3.612071000  | -1.425723000 | -0.696161000 |
| O | 3.647314000  | 1.279133000  | 2.104860000  |
| O | 3.597041000  | 1.398172000  | -0.610086000 |
| O | 2.024137000  | 2.669927000  | -1.578226000 |
| O | 2.097374000  | 2.446625000  | 3.248135000  |

|    |              |              |              |
|----|--------------|--------------|--------------|
| O  | 1.069675000  | 1.405722000  | 0.743290000  |
| O  | 1.410042000  | -0.128086000 | 2.783409000  |
| O  | 0.037313000  | -1.529856000 | 4.565177000  |
| O  | -0.027012000 | 1.081620000  | 4.719048000  |
| O  | 1.069171000  | -1.546214000 | 0.690442000  |
| O  | -1.390430000 | -2.139495000 | 0.660259000  |
| O  | -2.053479000 | -2.356173000 | -2.032039000 |
| O  | -0.030533000 | -3.914088000 | -0.748848000 |
| O  | -3.598122000 | -1.418758000 | -0.700834000 |
| O  | -0.012289000 | 3.781049000  | 2.187880000  |
| O  | 0.032822000  | 3.948852000  | -0.422629000 |
| O  | -1.392739000 | 2.001246000  | 0.772623000  |
| O  | -2.048073000 | 2.247181000  | 3.460873000  |
| O  | -2.073249000 | 2.500219000  | -1.770722000 |
| O  | 1.382070000  | -0.016041000 | -1.345582000 |
| O  | -1.079891000 | -0.037504000 | -0.775432000 |
| H  | 1.900256000  | -0.006395000 | -2.174104000 |
| O  | 0.050352000  | 1.663127000  | -3.162936000 |
| H  | -0.768986000 | 1.833936000  | -3.644370000 |
| Hf | 2.529571000  | -0.062958000 | 0.691691000  |
| Hf | -0.014431000 | -1.872853000 | 2.493084000  |
| Hf | 0.038086000  | 1.706898000  | 2.508430000  |
| Hf | -0.031086000 | 1.739930000  | -1.078419000 |
| Hf | -2.528929000 | -0.066584000 | 0.712079000  |
| Hf | 0.030374000  | -1.829713000 | -1.073267000 |
| C  | -0.733222000 | -1.314764000 | -5.475949000 |
| C  | 0.336297000  | -1.111749000 | -4.463887000 |
| C  | 1.630404000  | -0.467151000 | -4.892217000 |
| H  | 2.333559000  | -1.301863000 | -5.077366000 |
| H  | -0.293534000 | -1.840350000 | -6.347821000 |
| H  | 1.475573000  | 0.015591000  | -5.877536000 |
| H  | 1.464236000  | 1.062718000  | -3.752562000 |
| H  | -1.792416000 | -2.057187000 | -4.030025000 |
| H  | -0.960639000 | -0.291212000 | -5.849225000 |
| O  | 2.180371000  | 0.389231000  | -3.954403000 |
| O  | 0.124742000  | -1.481783000 | -3.316115000 |
| O  | -1.856972000 | -1.959046000 | -5.003155000 |
| C  | -3.456630000 | 0.262967000  | -5.396693000 |
| C  | -4.625633000 | -0.186387000 | -4.562310000 |
| C  | -5.692576000 | 0.893951000  | -4.509160000 |
| H  | -3.385093000 | -0.251420000 | -6.390603000 |
| H  | -7.295793000 | 1.157493000  | -3.457383000 |
| H  | -6.098448000 | 1.045521000  | -5.529798000 |
| H  | -5.239606000 | 1.844673000  | -4.181172000 |
| H  | -5.869703000 | -1.648121000 | -4.563244000 |
| H  | -4.251175000 | -0.321121000 | -3.521658000 |



|   |              |              |              |
|---|--------------|--------------|--------------|
| O | -2.679061000 | 1.125809000  | -5.059394000 |
| O | -6.682732000 | 0.433098000  | -3.621120000 |
| O | -5.121926000 | -1.372035000 | -5.110709000 |

### 3. Ti-NU-1000 case

#### Ti-NU-1000

|   |              |              |              |
|---|--------------|--------------|--------------|
| C | -3.248200000 | -2.182800000 | -1.650100000 |
| C | -3.229700000 | -2.386600000 | 2.900000000  |
| C | -3.232300000 | 2.034300000  | 3.104000000  |
| C | 3.276900000  | 2.142000000  | 2.939200000  |
| C | 3.226900000  | 2.366300000  | -1.338700000 |
| C | 3.259300000  | -2.277900000 | -1.561500000 |
| C | -3.265300000 | 2.236100000  | -1.457300000 |
| C | 3.257200000  | -2.506600000 | 2.716400000  |
| H | 4.124342000  | 2.647321000  | 3.449736000  |
| H | 4.125467000  | -3.090437000 | 3.099295000  |
| H | -4.064694000 | 2.518931000  | 3.663572000  |
| H | -4.026581000 | -2.975129000 | 3.403880000  |
| C | 5.694690000  | -2.756388000 | -1.824880000 |
| C | -5.705514000 | -2.626430000 | -1.873240000 |
| C | 4.372682000  | -3.004104000 | -2.217598000 |
| C | -4.393095000 | -2.867519000 | -2.299453000 |
| C | 4.109473000  | -3.937418000 | -3.228606000 |
| C | -4.154572000 | -3.764364000 | -3.348529000 |
| C | 5.159379000  | -4.615734000 | -3.840374000 |
| C | -5.219632000 | -4.412791000 | -3.965945000 |
| C | 6.474865000  | -4.367985000 | -3.444900000 |
| C | -6.526588000 | -4.169872000 | -3.539415000 |
| C | 6.740995000  | -3.438985000 | -2.437573000 |
| C | -6.767977000 | -3.277524000 | -2.493675000 |
| C | 5.697135000  | 2.787539000  | -1.388609000 |
| C | -5.704050000 | 2.682251000  | -1.770521000 |
| C | 4.410820000  | 3.109300000  | -1.840925000 |
| C | -4.374483000 | 3.007146000  | -2.069222000 |
| C | 4.237069000  | 4.146222000  | -2.766604000 |
| C | -4.094467000 | 4.065462000  | -2.943203000 |
| C | 5.339638000  | 4.853798000  | -3.235683000 |
| C | -5.135982000 | 4.789843000  | -3.514981000 |
| C | 6.619480000  | 4.533032000  | -2.779804000 |
| C | -6.459725000 | 4.460883000  | -3.218396000 |
| C | 6.796611000  | 3.501339000  | -1.856442000 |
| C | -6.742201000 | 3.408036000  | -2.346564000 |
| H | 5.877483000  | -2.024938000 | -1.035508000 |
| H | -5.870041000 | -1.925599000 | -1.052713000 |
| H | 3.074640000  | -4.115616000 | -3.527112000 |

|   |              |              |              |
|---|--------------|--------------|--------------|
| H | -3.123721000 | -3.938739000 | -3.662974000 |
| H | 4.953114000  | -5.341269000 | -4.630337000 |
| H | -5.032722000 | -5.112143000 | -4.784041000 |
| H | 7.771135000  | -3.246567000 | -2.129761000 |
| H | -7.791321000 | -3.089450000 | -2.161006000 |
| H | 5.811681000  | 1.976558000  | -0.666867000 |
| H | -5.900081000 | 1.856947000  | -1.083708000 |
| H | 3.227994000  | 4.378323000  | -3.113524000 |
| H | -3.052538000 | 4.310621000  | -3.158023000 |
| H | 5.203147000  | 5.658870000  | -3.961170000 |
| H | -4.916697000 | 5.616218000  | -4.194678000 |
| H | 7.798947000  | 3.252714000  | -1.500598000 |
| H | -7.778691000 | 3.153216000  | -2.114920000 |
| H | -7.362205000 | -4.679873000 | -4.025002000 |
| H | 7.298003000  | -4.902074000 | -3.925608000 |
| H | -7.276545000 | 5.029925000  | -3.668883000 |
| H | 7.484486000  | 5.090295000  | -3.147500000 |
| H | -1.861184000 | -2.844172000 | 0.574286000  |
| H | -0.894355000 | 1.546321000  | 4.635835000  |
| H | -0.073152000 | 0.195201000  | 4.539575000  |
| H | 0.071260000  | 3.740867000  | 0.459813000  |
| H | 0.742535000  | 3.825627000  | 2.671685000  |
| H | 0.891397000  | 3.877822000  | -0.884500000 |
| H | 1.861538000  | -0.172375000 | 3.446132000  |
| H | -1.877528000 | 2.653055000  | 0.835653000  |
| H | -0.698475000 | -2.052113000 | 4.701988000  |
| H | 0.926178000  | -4.000163000 | 2.306964000  |
| H | 0.742938000  | -4.011692000 | -1.261373000 |
| H | 0.085903000  | -3.914628000 | 0.971649000  |
| O | -1.083925000 | -0.110917000 | 2.079259000  |
| O | -3.574769000 | 1.267888000  | 2.149811000  |
| O | -3.566756000 | 1.320761000  | -0.607778000 |
| O | -3.595584000 | -1.524310000 | 2.053692000  |
| O | -2.034983000 | -2.627582000 | 3.225285000  |
| O | 0.036319000  | -3.798262000 | 1.957959000  |
| O | 2.105294000  | -2.862836000 | 3.032179000  |
| O | 2.051883000  | -2.544830000 | -1.882650000 |
| O | 3.554544000  | -1.504761000 | 1.985102000  |
| O | 3.540636000  | -1.393302000 | -0.684688000 |
| O | 3.592506000  | 1.258914000  | 2.072276000  |
| O | 3.466454000  | 1.326588000  | -0.595689000 |
| O | 2.069916000  | 2.729363000  | -1.625532000 |
| O | 2.108019000  | 2.460365000  | 3.239236000  |
| O | 1.064960000  | 1.267989000  | 0.686766000  |
| O | 1.336785000  | -0.115310000 | 2.635458000  |
| O | -0.010706000 | -1.523908000 | 4.269366000  |

|    |              |              |              |
|----|--------------|--------------|--------------|
| O  | -0.018922000 | 1.179373000  | 4.405919000  |
| O  | 1.063781000  | -1.468772000 | 0.695229000  |
| O  | -1.351010000 | -2.028260000 | 0.672099000  |
| O  | -2.072652000 | -2.374970000 | -2.029695000 |
| O  | 0.029537000  | -3.615992000 | -0.738671000 |
| O  | -3.533460000 | -1.370820000 | -0.664627000 |
| O  | 0.023321000  | 3.435721000  | 2.151216000  |
| O  | 0.011016000  | 3.654054000  | -0.529496000 |
| O  | -1.347746000 | 1.849483000  | 0.739693000  |
| O  | -2.056652000 | 2.281228000  | 3.454031000  |
| O  | -2.072253000 | 2.490611000  | -1.777326000 |
| O  | 1.204461000  | -0.071683000 | -1.375094000 |
| O  | -1.104504000 | -0.068280000 | -0.693542000 |
| Ti | 2.491048000  | -0.015177000 | 0.693935000  |
| Ti | -0.126886000 | -1.697029000 | 2.404898000  |
| Ti | 0.059842000  | 1.563474000  | 2.302677000  |
| Ti | -0.140056000 | 1.569387000  | -1.031562000 |
| Ti | -2.508582000 | -0.092592000 | 0.630623000  |
| Ti | 0.105321000  | -1.735175000 | -0.825202000 |
| H  | 1.708387000  | -0.021867000 | -2.199119000 |
| O  | -0.014743000 | 1.613834000  | -2.849502000 |
| H  | -0.793803000 | 2.005571000  | -3.270106000 |

## Ti-NU-1000 Ads

|   |              |              |              |
|---|--------------|--------------|--------------|
| C | -3.248200000 | -2.182800000 | -1.650100000 |
| C | -3.229700000 | -2.386600000 | 2.900000000  |
| C | -3.232300000 | 2.034300000  | 3.104000000  |
| C | 3.276900000  | 2.142000000  | 2.939200000  |
| C | 3.226900000  | 2.366300000  | -1.338700000 |
| C | 3.259300000  | -2.277900000 | -1.561500000 |
| C | -3.265300000 | 2.236100000  | -1.457300000 |
| C | 3.257200000  | -2.506600000 | 2.716400000  |
| H | 4.110390000  | 2.677052000  | 3.443399000  |
| H | 4.122314000  | -3.068300000 | 3.136354000  |
| H | -4.084376000 | 2.523915000  | 3.627847000  |
| H | -4.038310000 | -2.953032000 | 3.410555000  |
| C | 5.675091000  | -2.673159000 | -2.056178000 |
| C | -5.691146000 | -2.210073000 | -2.189176000 |
| C | 4.333304000  | -3.009115000 | -2.275720000 |
| C | -4.410640000 | -2.744502000 | -2.387523000 |
| C | 4.008589000  | -4.035607000 | -3.173529000 |
| C | -4.229598000 | -3.790792000 | -3.302095000 |
| C | 5.019093000  | -4.717424000 | -3.845550000 |
| C | -5.314413000 | -4.289591000 | -4.016794000 |
| C | 6.354970000  | -4.377289000 | -3.626560000 |
| C | -6.586183000 | -3.750793000 | -3.819623000 |

|   |              |              |              |
|---|--------------|--------------|--------------|
| C | 6.681335000  | -3.355729000 | -2.732837000 |
| C | -6.773315000 | -2.712275000 | -2.905399000 |
| C | 5.678890000  | 2.779638000  | -1.638564000 |
| C | -5.716272000 | 2.582121000  | -1.799418000 |
| C | 4.355835000  | 3.108017000  | -1.960664000 |
| C | -4.396759000 | 2.893719000  | -2.153301000 |
| C | 4.098257000  | 4.139127000  | -2.873069000 |
| C | -4.147088000 | 3.816700000  | -3.176819000 |
| C | 5.153304000  | 4.834372000  | -3.456930000 |
| C | -5.210302000 | 4.422537000  | -3.839128000 |
| C | 6.470154000  | 4.505554000  | -3.131372000 |
| C | -6.523818000 | 4.113370000  | -3.482069000 |
| C | 6.731145000  | 3.478802000  | -2.222447000 |
| C | -6.775838000 | 3.194136000  | -2.462078000 |
| H | 5.904063000  | -1.871680000 | -1.351434000 |
| H | -5.812023000 | -1.397025000 | -1.470819000 |
| H | 2.957471000  | -4.292163000 | -3.330573000 |
| H | -3.231104000 | -4.206734000 | -3.455178000 |
| H | 4.765447000  | -5.519781000 | -4.541897000 |
| H | -5.164106000 | -5.098213000 | -4.735010000 |
| H | 7.727552000  | -3.091781000 | -2.563393000 |
| H | -7.769673000 | -2.291419000 | -2.752680000 |
| H | 5.858098000  | 1.972629000  | -0.925766000 |
| H | -5.887536000 | 1.860154000  | -0.998672000 |
| H | 3.061644000  | 4.379665000  | -3.118213000 |
| H | -3.113497000 | 4.038458000  | -3.446321000 |
| H | 4.950127000  | 5.636462000  | -4.170132000 |
| H | -5.015474000 | 5.139070000  | -4.640110000 |
| H | 7.762323000  | 3.223025000  | -1.968617000 |
| H | -7.804502000 | 2.954393000  | -2.183652000 |
| H | -7.437054000 | -4.141342000 | -4.383117000 |
| H | 7.147150000  | -4.913076000 | -4.154995000 |
| H | -7.357036000 | 4.591474000  | -4.002997000 |
| H | 7.297854000  | 5.052613000  | -3.589260000 |
| H | -1.861666000 | -2.788750000 | 0.543720000  |
| H | -0.903793000 | 1.472807000  | 4.666170000  |
| H | -0.060490000 | 0.136399000  | 4.535449000  |
| H | 0.081783000  | 3.788411000  | 0.552411000  |
| H | 0.741960000  | 3.846145000  | 2.748527000  |
| H | 0.923815000  | 3.935562000  | -0.779722000 |
| H | 1.895417000  | -0.209123000 | 3.431071000  |
| H | -1.855078000 | 2.676887000  | 0.825067000  |
| H | -0.692404000 | -2.089308000 | 4.636646000  |
| H | 0.916878000  | -4.023379000 | 2.232144000  |
| H | 0.771925000  | -3.982571000 | -1.288180000 |
| H | 0.078310000  | -3.888760000 | 0.897425000  |

|    |              |              |              |
|----|--------------|--------------|--------------|
| O  | -1.059532000 | -0.094585000 | 2.078673000  |
| O  | -3.546715000 | 1.266894000  | 2.136628000  |
| O  | -3.543271000 | 1.325500000  | -0.589190000 |
| O  | -3.583068000 | -1.515757000 | 2.050691000  |
| O  | -2.038126000 | -2.652015000 | 3.206819000  |
| O  | 0.032877000  | -3.794634000 | 1.888181000  |
| O  | 2.101566000  | -2.879905000 | 2.995100000  |
| O  | 2.045408000  | -2.534127000 | -1.841257000 |
| O  | 3.559237000  | -1.508422000 | 1.980760000  |
| O  | 3.582611000  | -1.402736000 | -0.690671000 |
| O  | 3.601529000  | 1.263852000  | 2.082486000  |
| O  | 3.524994000  | 1.372747000  | -0.578480000 |
| O  | 2.041349000  | 2.713935000  | -1.575637000 |
| O  | 2.099851000  | 2.440643000  | 3.256620000  |
| O  | 1.082433000  | 1.328068000  | 0.746384000  |
| O  | 1.357054000  | -0.129614000 | 2.631336000  |
| O  | 0.007550000  | -1.557947000 | 4.227309000  |
| O  | -0.020141000 | 1.127714000  | 4.436265000  |
| O  | 1.069194000  | -1.449627000 | 0.667054000  |
| O  | -1.331011000 | -1.985700000 | 0.638471000  |
| O  | -2.076342000 | -2.508031000 | -1.951151000 |
| O  | 0.036328000  | -3.589409000 | -0.793407000 |
| O  | -3.510967000 | -1.332222000 | -0.710982000 |
| O  | 0.020821000  | 3.457266000  | 2.229840000  |
| O  | 0.040735000  | 3.701099000  | -0.440127000 |
| O  | -1.318680000 | 1.873390000  | 0.774375000  |
| O  | -2.070310000 | 2.268544000  | 3.496883000  |
| O  | -2.075944000 | 2.553776000  | -1.730203000 |
| O  | 1.355948000  | 0.007413000  | -1.215681000 |
| O  | -1.048702000 | -0.016868000 | -0.704902000 |
| H  | 1.869300000  | -0.005689000 | -2.054909000 |
| O  | -0.024052000 | 1.553001000  | -2.806920000 |
| H  | -0.850694000 | 1.971872000  | -3.114481000 |
| Ti | 2.483109000  | -0.060149000 | 0.680911000  |
| Ti | -0.091841000 | -1.702803000 | 2.354241000  |
| Ti | 0.091923000  | 1.581710000  | 2.355401000  |
| Ti | -0.047416000 | 1.610883000  | -0.915717000 |
| Ti | -2.466298000 | -0.058665000 | 0.660626000  |
| Ti | 0.110073000  | -1.704942000 | -0.939897000 |
| C  | -1.804138000 | -2.161361000 | -5.168060000 |
| C  | -0.384598000 | -2.652300000 | -4.820595000 |
| C  | 0.308373000  | -1.352676000 | -4.407567000 |
| C  | -1.622907000 | -0.682920000 | -5.520507000 |
| C  | 1.817153000  | -1.255548000 | -4.529364000 |
| C  | -2.463858000 | 0.291071000  | -4.717812000 |
| H  | 2.280652000  | -2.150330000 | -4.101308000 |

|   |              |              |              |
|---|--------------|--------------|--------------|
| H | 0.105305000  | -3.010552000 | -5.746607000 |
| H | -2.408425000 | -2.237741000 | -4.253475000 |
| H | -1.108724000 | 1.589390000  | -5.086414000 |
| H | 2.074730000  | -1.211939000 | -5.601176000 |
| H | 1.888375000  | 0.662974000  | -4.137288000 |
| H | -2.375800000 | 0.039971000  | -3.638763000 |
| H | -3.527847000 | 0.186100000  | -4.982595000 |
| H | -0.930129000 | -3.455364000 | -3.154880000 |
| H | -0.132933000 | -0.072791000 | -2.988948000 |
| H | -1.949215000 | -2.951028000 | -6.928285000 |
| H | -1.781675000 | -0.510076000 | -6.598886000 |
| O | -2.481073000 | -2.928290000 | -6.123852000 |
| O | 2.331224000  | -0.142215000 | -3.826324000 |
| O | -2.069821000 | 1.617820000  | -4.972338000 |
| O | -0.114106000 | -1.072286000 | -3.068224000 |
| O | -0.320936000 | -3.677274000 | -3.887436000 |
| O | -0.232526000 | -0.379219000 | -5.262520000 |

## Ti-NU-1000 TS1

|   |              |              |              |
|---|--------------|--------------|--------------|
| C | -3.248200000 | -2.182800000 | -1.650100000 |
| C | -3.229700000 | -2.386600000 | 2.900000000  |
| C | -3.232300000 | 2.034300000  | 3.104000000  |
| C | 3.276900000  | 2.142000000  | 2.939200000  |
| C | 3.226900000  | 2.366300000  | -1.338700000 |
| C | 3.259300000  | -2.277900000 | -1.561500000 |
| C | -3.265300000 | 2.236100000  | -1.457300000 |
| C | 3.257200000  | -2.506600000 | 2.716400000  |
| H | 4.103739000  | 2.690437000  | 3.440647000  |
| H | 4.125994000  | -3.050555000 | 3.150905000  |
| H | -4.082705000 | 2.530164000  | 3.624058000  |
| H | -4.042867000 | -2.944964000 | 3.412049000  |
| C | 5.680228000  | -2.663584000 | -2.041397000 |
| C | -5.676081000 | -2.184244000 | -2.247827000 |
| C | 4.340869000  | -3.004167000 | -2.268436000 |
| C | -4.402802000 | -2.751838000 | -2.392804000 |
| C | 4.023996000  | -4.032021000 | -3.167632000 |
| C | -4.220154000 | -3.835544000 | -3.262434000 |
| C | 5.040476000  | -4.710871000 | -3.833482000 |
| C | -5.296729000 | -4.339390000 | -3.985906000 |
| C | 6.374026000  | -4.366230000 | -3.607238000 |
| C | -6.560993000 | -3.766484000 | -3.843755000 |
| C | 6.692324000  | -3.343167000 | -2.712341000 |
| C | -6.749515000 | -2.690223000 | -2.974579000 |
| C | 5.663729000  | 2.869559000  | -1.598802000 |
| C | -5.713663000 | 2.621623000  | -1.773530000 |
| C | 4.335451000  | 3.152659000  | -1.941966000 |

|   |              |              |              |
|---|--------------|--------------|--------------|
| C | -4.393278000 | 2.904587000  | -2.147629000 |
| C | 4.057238000  | 4.178298000  | -2.854451000 |
| C | -4.139513000 | 3.810008000  | -3.185605000 |
| C | 5.097067000  | 4.912658000  | -3.417632000 |
| C | -5.199620000 | 4.427989000  | -3.841535000 |
| C | 6.418967000  | 4.628504000  | -3.071404000 |
| C | -6.513986000 | 4.148227000  | -3.463810000 |
| C | 6.700499000  | 3.607471000  | -2.162131000 |
| C | -6.770053000 | 3.245865000  | -2.429886000 |
| H | 5.902975000  | -1.861050000 | -1.335916000 |
| H | -5.797767000 | -1.341899000 | -1.563953000 |
| H | 2.974357000  | -4.291317000 | -3.330587000 |
| H | -3.226734000 | -4.276860000 | -3.371732000 |
| H | 4.793305000  | -5.514180000 | -4.531034000 |
| H | -5.145808000 | -5.178366000 | -4.668233000 |
| H | 7.736737000  | -3.075643000 | -2.537486000 |
| H | -7.740009000 | -2.242813000 | -2.865444000 |
| H | 5.858595000  | 2.066277000  | -0.885850000 |
| H | -5.888204000 | 1.911830000  | -0.962601000 |
| H | 3.017290000  | 4.384227000  | -3.116327000 |
| H | -3.105086000 | 4.007005000  | -3.470755000 |
| H | 4.877863000  | 5.710432000  | -4.130926000 |
| H | -5.002035000 | 5.130755000  | -4.653976000 |
| H | 7.735606000  | 3.386585000  | -1.892037000 |
| H | -7.799385000 | 3.028806000  | -2.135701000 |
| H | -7.405050000 | -4.160178000 | -4.415217000 |
| H | 7.170816000  | -4.899647000 | -4.131147000 |
| H | -7.344756000 | 4.635919000  | -3.979734000 |
| H | 7.234502000  | 5.206125000  | -3.513274000 |
| H | -1.874708000 | -2.777608000 | 0.546830000  |
| H | -0.908002000 | 1.441226000  | 4.682347000  |
| H | -0.061372000 | 0.107362000  | 4.527922000  |
| H | 0.095323000  | 3.791127000  | 0.562703000  |
| H | 0.756816000  | 3.838622000  | 2.753606000  |
| H | 0.940872000  | 3.919686000  | -0.772443000 |
| H | 1.893154000  | -0.216913000 | 3.425598000  |
| H | -1.840162000 | 2.696254000  | 0.816856000  |
| H | -0.681874000 | -2.109573000 | 4.608937000  |
| H | 0.906783000  | -4.032424000 | 2.203319000  |
| H | 0.779717000  | -3.966319000 | -1.294191000 |
| H | 0.076096000  | -3.872673000 | 0.864934000  |
| O | -1.063444000 | -0.089930000 | 2.078460000  |
| O | -3.548260000 | 1.264155000  | 2.139344000  |
| O | -3.546668000 | 1.335055000  | -0.579717000 |
| O | -3.581801000 | -1.508408000 | 2.053805000  |
| O | -2.040476000 | -2.662543000 | 3.196463000  |

|    |              |              |              |
|----|--------------|--------------|--------------|
| O  | 0.027336000  | -3.790979000 | 1.858353000  |
| O  | 2.104294000  | -2.892012000 | 2.980494000  |
| O  | 2.051240000  | -2.537016000 | -1.844424000 |
| O  | 3.554907000  | -1.508617000 | 1.975502000  |
| O  | 3.578733000  | -1.401133000 | -0.685553000 |
| O  | 3.605139000  | 1.262517000  | 2.090315000  |
| O  | 3.538324000  | 1.389744000  | -0.574363000 |
| O  | 2.026542000  | 2.676056000  | -1.603895000 |
| O  | 2.095487000  | 2.434847000  | 3.259572000  |
| O  | 1.074426000  | 1.333233000  | 0.751726000  |
| O  | 1.356746000  | -0.133550000 | 2.624884000  |
| O  | 0.014866000  | -1.571130000 | 4.203546000  |
| O  | -0.025162000 | 1.102109000  | 4.442953000  |
| O  | 1.062267000  | -1.442384000 | 0.652847000  |
| O  | -1.340568000 | -1.975309000 | 0.626757000  |
| O  | -2.073588000 | -2.509912000 | -1.941925000 |
| O  | 0.035536000  | -3.576553000 | -0.808878000 |
| O  | -3.516938000 | -1.324345000 | -0.720860000 |
| O  | 0.025009000  | 3.459960000  | 2.241286000  |
| O  | 0.056881000  | 3.691323000  | -0.429539000 |
| O  | -1.316918000 | 1.882895000  | 0.787857000  |
| O  | -2.069600000 | 2.263815000  | 3.499190000  |
| O  | -2.071064000 | 2.535228000  | -1.742126000 |
| O  | 1.372502000  | 0.010819000  | -1.195933000 |
| O  | -1.044219000 | -0.002452000 | -0.684958000 |
| H  | 1.875201000  | 0.006094000  | -2.043471000 |
| O  | -0.067029000 | 1.362237000  | -2.836139000 |
| H  | -0.911879000 | 1.740172000  | -3.152667000 |
| Ti | 2.477544000  | -0.106979000 | 0.680405000  |
| Ti | -0.086621000 | -1.703816000 | 2.324773000  |
| Ti | 0.087806000  | 1.583753000  | 2.373970000  |
| Ti | -0.024589000 | 1.592240000  | -0.859842000 |
| Ti | -2.476939000 | -0.059353000 | 0.676630000  |
| Ti | 0.082681000  | -1.696048000 | -1.017440000 |
| C  | -1.753210000 | -2.270329000 | -5.127927000 |
| C  | -0.327362000 | -2.700291000 | -4.739391000 |
| C  | 0.320379000  | -1.375922000 | -4.316143000 |
| C  | -1.618669000 | -0.787344000 | -5.478964000 |
| C  | 1.828002000  | -1.260060000 | -4.487579000 |
| C  | -2.501397000 | 0.148151000  | -4.675748000 |
| H  | 2.316158000  | -2.153772000 | -4.086752000 |
| H  | 0.195599000  | -3.047769000 | -5.651878000 |
| H  | -2.382949000 | -2.368856000 | -4.234030000 |
| H  | -1.197843000 | 1.471977000  | -5.142931000 |
| H  | 2.051518000  | -1.203749000 | -5.566251000 |
| H  | 1.935835000  | 0.658113000  | -4.122158000 |



|   |              |              |              |
|---|--------------|--------------|--------------|
| H | -2.417549000 | -0.115873000 | -3.600604000 |
| H | -3.558852000 | 0.016052000  | -4.956283000 |
| H | -0.877550000 | -3.515025000 | -3.083448000 |
| H | -0.117048000 | 0.169547000  | -2.958445000 |
| H | -1.804143000 | -3.081513000 | -6.883579000 |
| H | -1.785036000 | -0.621384000 | -6.557865000 |
| O | -2.369709000 | -3.066906000 | -6.102334000 |
| O | 2.361787000  | -0.148129000 | -3.793983000 |
| O | -2.134287000 | 1.492872000  | -4.897222000 |
| O | -0.084079000 | -1.053430000 | -3.009500000 |
| O | -0.249870000 | -3.722374000 | -3.802276000 |
| O | -0.245927000 | -0.434776000 | -5.220120000 |

## Ti-NU-1000 Int1

|   |              |              |              |
|---|--------------|--------------|--------------|
| C | -3.248200000 | -2.182800000 | -1.650100000 |
| C | -3.229700000 | -2.386600000 | 2.900000000  |
| C | -3.232300000 | 2.034300000  | 3.104000000  |
| C | 3.276900000  | 2.142000000  | 2.939200000  |
| C | 3.226900000  | 2.366300000  | -1.338700000 |
| C | 3.259300000  | -2.277900000 | -1.561500000 |
| C | -3.265300000 | 2.236100000  | -1.457300000 |
| C | 3.257200000  | -2.506600000 | 2.716400000  |
| H | 4.099617000  | 2.689593000  | 3.449861000  |
| H | 4.128719000  | -3.034964000 | 3.165223000  |
| H | -4.078224000 | 2.534205000  | 3.627727000  |
| H | -4.041711000 | -2.944907000 | 3.414558000  |
| C | 5.705900000  | -2.553817000 | -2.018875000 |
| C | -5.671485000 | -2.168328000 | -2.279817000 |
| C | 4.384546000  | -2.948605000 | -2.265004000 |
| C | -4.403668000 | -2.753285000 | -2.396274000 |
| C | 4.123249000  | -3.975041000 | -3.183692000 |
| C | -4.224261000 | -3.858487000 | -3.238956000 |
| C | 5.175343000  | -4.597101000 | -3.850412000 |
| C | -5.297995000 | -4.365012000 | -3.965388000 |
| C | 6.490272000  | -4.197542000 | -3.605554000 |
| C | -6.556227000 | -3.772062000 | -3.854492000 |
| C | 6.754086000  | -3.176727000 | -2.690543000 |
| C | -6.741914000 | -2.675124000 | -3.011001000 |
| C | 5.671912000  | 2.863808000  | -1.564324000 |
| C | -5.697109000 | 2.564465000  | -1.940494000 |
| C | 4.349912000  | 3.147799000  | -1.930886000 |
| C | -4.365209000 | 2.922531000  | -2.179590000 |
| C | 4.090268000  | 4.166039000  | -2.857006000 |
| C | -4.069311000 | 3.926088000  | -3.110504000 |
| C | 5.141857000  | 4.890399000  | -3.412122000 |
| C | -5.098111000 | 4.564082000  | -3.796397000 |

|   |              |              |              |
|---|--------------|--------------|--------------|
| C | 6.457293000  | 4.604894000  | -3.043003000 |
| C | -6.426069000 | 4.202213000  | -3.558709000 |
| C | 6.720545000  | 3.592426000  | -2.118584000 |
| C | -6.723972000 | 3.203322000  | -2.631036000 |
| H | 5.886131000  | -1.757405000 | -1.294044000 |
| H | -5.791410000 | -1.313109000 | -1.611706000 |
| H | 3.087652000  | -4.278915000 | -3.359337000 |
| H | -3.234838000 | -4.315025000 | -3.319501000 |
| H | 4.970692000  | -5.399890000 | -4.562295000 |
| H | -5.150979000 | -5.223563000 | -4.623933000 |
| H | 7.784175000  | -2.868477000 | -2.498012000 |
| H | -7.728347000 | -2.213918000 | -2.923449000 |
| H | 5.851218000  | 2.069067000  | -0.837343000 |
| H | -5.904888000 | 1.784344000  | -1.205717000 |
| H | 3.054506000  | 4.373974000  | -3.133956000 |
| H | -3.022764000 | 4.188963000  | -3.277885000 |
| H | 4.936804000  | 5.682765000  | -4.135749000 |
| H | -4.867940000 | 5.350942000  | -4.518752000 |
| H | 7.750407000  | 3.372545000  | -1.827926000 |
| H | -7.763229000 | 2.923898000  | -2.443487000 |
| H | -7.397825000 | -4.167798000 | -4.428222000 |
| H | 7.314983000  | -4.687198000 | -4.129064000 |
| H | -7.233069000 | 4.704621000  | -4.097727000 |
| H | 7.281794000  | 5.175668000  | -3.477181000 |
| H | -1.915336000 | -2.746898000 | 0.560179000  |
| H | -0.908408000 | 1.421706000  | 4.687691000  |
| H | -0.058938000 | 0.092152000  | 4.509802000  |
| H | 0.105578000  | 3.799503000  | 0.557040000  |
| H | 0.765994000  | 3.833846000  | 2.753581000  |
| H | 0.933512000  | 3.900517000  | -0.790235000 |
| H | 1.891684000  | -0.205733000 | 3.403035000  |
| H | -1.854035000 | 2.712511000  | 0.802706000  |
| H | -0.671090000 | -2.116589000 | 4.579077000  |
| H | 0.898340000  | -4.019540000 | 2.155575000  |
| H | 0.806849000  | -3.957044000 | -1.252054000 |
| H | 0.057802000  | -3.840956000 | 0.819056000  |
| O | -1.075486000 | -0.080039000 | 2.068383000  |
| O | -3.557180000 | 1.265990000  | 2.140772000  |
| O | -3.579569000 | 1.330793000  | -0.599602000 |
| O | -3.589402000 | -1.502743000 | 2.060519000  |
| O | -2.040878000 | -2.666414000 | 3.184978000  |
| O | 0.017282000  | -3.773377000 | 1.818941000  |
| O | 2.107045000  | -2.906677000 | 2.966975000  |
| O | 2.076729000  | -2.591913000 | -1.845819000 |
| O | 3.549839000  | -1.508954000 | 1.972027000  |
| O | 3.549038000  | -1.371163000 | -0.700578000 |

|    |              |              |              |
|----|--------------|--------------|--------------|
| O  | 3.604932000  | 1.268789000  | 2.088831000  |
| O  | 3.527235000  | 1.375312000  | -0.595022000 |
| O  | 2.035184000  | 2.695060000  | -1.611512000 |
| O  | 2.092320000  | 2.438149000  | 3.257016000  |
| O  | 1.036977000  | 1.346137000  | 0.734166000  |
| O  | 1.348908000  | -0.123119000 | 2.606661000  |
| O  | 0.021172000  | -1.571981000 | 4.174869000  |
| O  | -0.026379000 | 1.089589000  | 4.438774000  |
| O  | 1.052551000  | -1.431359000 | 0.636244000  |
| O  | -1.368890000 | -1.951434000 | 0.617860000  |
| O  | -2.081196000 | -2.525362000 | -1.939692000 |
| O  | 0.021306000  | -3.580845000 | -0.827049000 |
| O  | -3.525706000 | -1.321062000 | -0.727794000 |
| O  | 0.020671000  | 3.469985000  | 2.249249000  |
| O  | 0.048059000  | 3.700071000  | -0.432096000 |
| O  | -1.338792000 | 1.893629000  | 0.795437000  |
| O  | -2.067831000 | 2.259206000  | 3.496108000  |
| O  | -2.063976000 | 2.544639000  | -1.697348000 |
| O  | 1.309910000  | 0.033484000  | -1.229077000 |
| O  | -1.092814000 | 0.027259000  | -0.720325000 |
| H  | 1.801392000  | 0.023682000  | -2.075383000 |
| O  | -0.031846000 | 1.709903000  | -2.929405000 |
| H  | -0.887662000 | 1.690817000  | -3.426898000 |
| Ti | 2.434379000  | -0.138823000 | 0.670633000  |
| Ti | -0.087676000 | -1.698551000 | 2.291294000  |
| Ti | 0.076272000  | 1.595584000  | 2.373915000  |
| Ti | -0.067927000 | 1.589009000  | -0.854066000 |
| Ti | -2.491969000 | -0.060632000 | 0.688079000  |
| Ti | 0.022505000  | -1.694692000 | -1.117930000 |
| C  | -1.764521000 | -2.251184000 | -5.148724000 |
| C  | -0.328465000 | -2.715632000 | -4.856040000 |
| C  | 0.315488000  | -1.443323000 | -4.267162000 |
| C  | -1.654671000 | -0.725656000 | -5.269819000 |
| C  | 1.806219000  | -1.296938000 | -4.505131000 |
| C  | -2.576925000 | 0.011693000  | -4.320967000 |
| H  | 2.328819000  | -2.193490000 | -4.141040000 |
| H  | 0.172439000  | -2.956959000 | -5.813033000 |
| H  | -2.371262000 | -2.495481000 | -4.266773000 |
| H  | -2.543605000 | 1.752973000  | -5.225347000 |
| H  | 1.977202000  | -1.193146000 | -5.588972000 |
| H  | 3.174026000  | 0.029320000  | -3.994956000 |
| H  | -2.360119000 | -0.306090000 | -3.288628000 |
| H  | -3.631539000 | -0.241695000 | -4.537990000 |
| H  | -0.688183000 | -3.636645000 | -3.209985000 |
| H  | 0.614149000  | 1.186219000  | -3.436580000 |
| H  | -1.837788000 | -2.803168000 | -7.001209000 |

|   |              |              |              |
|---|--------------|--------------|--------------|
| H | -1.863533000 | -0.413509000 | -6.311085000 |
| O | -2.399550000 | -2.891297000 | -6.222161000 |
| O | 2.237829000  | -0.124629000 | -3.819246000 |
| O | -2.359770000 | 1.410131000  | -4.342753000 |
| O | -0.018952000 | -1.360829000 | -2.943087000 |
| O | -0.222959000 | -3.837476000 | -4.043330000 |
| O | -0.294399000 | -0.384254000 | -5.000400000 |

## Hf-NU-1000 TS2

|   |              |              |              |
|---|--------------|--------------|--------------|
| C | -3.248200000 | -2.182800000 | -1.650100000 |
| C | -3.229700000 | -2.386600000 | 2.900000000  |
| C | -3.232300000 | 2.034300000  | 3.104000000  |
| C | 3.276900000  | 2.142000000  | 2.939200000  |
| C | 3.226900000  | 2.366300000  | -1.338700000 |
| C | 3.259300000  | -2.277900000 | -1.561500000 |
| C | -3.265300000 | 2.236100000  | -1.457300000 |
| C | 3.257200000  | -2.506600000 | 2.716400000  |
| H | 4.114404000  | 2.668477000  | 3.446106000  |
| H | 4.122365000  | -3.076239000 | 3.125973000  |
| H | -4.076454000 | 2.537273000  | 3.628097000  |
| H | -4.044400000 | -2.954690000 | 3.398880000  |
| C | 5.649698000  | -2.314542000 | -2.304397000 |
| C | -5.725955000 | -2.240628000 | -2.013714000 |
| C | 4.364477000  | -2.869734000 | -2.366059000 |
| C | -4.443370000 | -2.652381000 | -2.403674000 |
| C | 4.123340000  | -3.969301000 | -3.201393000 |
| C | -4.295274000 | -3.483310000 | -3.522081000 |
| C | 5.155400000  | -4.504653000 | -3.967927000 |
| C | -5.413355000 | -3.887826000 | -4.245438000 |
| C | 6.431189000  | -3.941360000 | -3.910525000 |
| C | -6.686859000 | -3.478791000 | -3.850599000 |
| C | 6.676559000  | -2.846661000 | -3.079734000 |
| C | -6.841867000 | -2.657027000 | -2.732468000 |
| C | 5.695385000  | 2.630838000  | -1.709101000 |
| C | -5.714614000 | 2.416116000  | -1.920450000 |
| C | 4.384341000  | 3.020731000  | -2.012524000 |
| C | -4.419060000 | 2.919046000  | -2.098403000 |
| C | 4.163660000  | 4.030667000  | -2.957298000 |
| C | -4.219272000 | 4.060217000  | -2.885771000 |
| C | 5.240613000  | 4.641678000  | -3.593346000 |
| C | -5.303130000 | 4.689201000  | -3.490397000 |
| C | 6.544952000  | 4.251234000  | -3.286315000 |
| C | -6.590716000 | 4.179707000  | -3.317318000 |
| C | 6.770614000  | 3.246867000  | -2.343424000 |
| C | -6.795098000 | 3.043444000  | -2.532852000 |
| H | 5.819542000  | -1.466350000 | -1.637571000 |

|   |              |              |              |
|---|--------------|--------------|--------------|
| H | -5.823695000 | -1.593877000 | -1.140085000 |
| H | 3.120015000  | -4.401673000 | -3.231717000 |
| H | -3.299441000 | -3.796355000 | -3.841933000 |
| H | 4.965922000  | -5.366518000 | -4.611588000 |
| H | -5.285993000 | -4.520269000 | -5.126472000 |
| H | 7.676626000  | -2.409986000 | -3.032720000 |
| H | -7.839472000 | -2.337097000 | -2.422898000 |
| H | 5.847664000  | 1.845666000  | -0.965899000 |
| H | -5.849880000 | 1.530264000  | -1.297409000 |
| H | 3.136521000  | 4.321664000  | -3.186308000 |
| H | -3.207760000 | 4.452597000  | -3.010431000 |
| H | 5.064210000  | 5.426570000  | -4.332379000 |
| H | -5.144185000 | 5.580639000  | -4.100899000 |
| H | 7.792235000  | 2.945423000  | -2.100643000 |
| H | -7.803563000 | 2.646341000  | -2.397642000 |
| H | -7.563780000 | -3.798617000 | -4.418866000 |
| H | 7.239745000  | -4.360678000 | -4.513869000 |
| H | -7.440460000 | 4.672310000  | -3.796069000 |
| H | 7.390124000  | 4.733229000  | -3.783709000 |
| H | -1.863913000 | -2.799461000 | 0.554216000  |
| H | -0.897956000 | 1.482428000  | 4.677398000  |
| H | -0.059426000 | 0.144189000  | 4.543810000  |
| H | 0.007869000  | 3.748489000  | 0.522173000  |
| H | 0.737288000  | 3.840707000  | 2.707125000  |
| H | 0.909056000  | 3.878289000  | -0.754815000 |
| H | 1.891643000  | -0.192715000 | 3.443779000  |
| H | -1.889235000 | 2.633154000  | 0.817315000  |
| H | -0.695285000 | -2.080026000 | 4.653562000  |
| H | 0.914811000  | -4.026747000 | 2.271780000  |
| H | 0.764580000  | -4.029611000 | -1.192729000 |
| H | 0.063381000  | -3.901775000 | 0.941024000  |
| O | -1.065031000 | -0.108295000 | 2.085677000  |
| O | -3.558772000 | 1.261654000  | 2.145258000  |
| O | -3.531374000 | 1.318926000  | -0.598386000 |
| O | -3.579234000 | -1.513854000 | 2.048540000  |
| O | -2.043281000 | -2.648271000 | 3.220187000  |
| O | 0.028149000  | -3.799687000 | 1.934069000  |
| O | 2.102348000  | -2.870059000 | 3.012670000  |
| O | 2.074351000  | -2.657729000 | -1.772880000 |
| O | 3.558398000  | -1.513048000 | 1.975500000  |
| O | 3.563505000  | -1.377909000 | -0.710085000 |
| O | 3.597333000  | 1.260161000  | 2.082953000  |
| O | 3.499361000  | 1.356371000  | -0.586781000 |
| O | 2.067130000  | 2.790142000  | -1.532621000 |
| O | 2.101737000  | 2.451982000  | 3.249418000  |
| O | 1.064437000  | 1.316668000  | 0.745542000  |

|    |              |              |              |
|----|--------------|--------------|--------------|
| O  | 1.353880000  | -0.123871000 | 2.642738000  |
| O  | 0.008378000  | -1.553341000 | 4.244748000  |
| O  | -0.017898000 | 1.134692000  | 4.439846000  |
| O  | 1.068742000  | -1.456769000 | 0.691711000  |
| O  | -1.332709000 | -1.997684000 | 0.657088000  |
| O  | -2.097512000 | -2.554533000 | -1.954537000 |
| O  | 0.018511000  | -3.623626000 | -0.727457000 |
| O  | -3.483088000 | -1.340087000 | -0.687653000 |
| O  | -0.000687000 | 3.448046000  | 2.215455000  |
| O  | 0.001792000  | 3.660840000  | -0.469217000 |
| O  | -1.340262000 | 1.838648000  | 0.769024000  |
| O  | -2.066330000 | 2.260590000  | 3.490345000  |
| O  | -2.084926000 | 2.549488000  | -1.771849000 |
| O  | 1.339731000  | -0.016853000 | -1.207214000 |
| O  | -1.061749000 | -0.046945000 | -0.728757000 |
| H  | 1.804960000  | -0.021404000 | -2.069768000 |
| O  | 0.099777000  | 1.641963000  | -2.808929000 |
| H  | 0.043878000  | 2.551375000  | -3.132846000 |
| Ti | 2.469222000  | -0.057398000 | 0.690680000  |
| Ti | -0.083917000 | -1.708903000 | 2.371738000  |
| Ti | 0.074705000  | 1.576521000  | 2.352144000  |
| Ti | -0.064142000 | 1.539403000  | -0.944882000 |
| Ti | -2.473515000 | -0.084883000 | 0.675729000  |
| Ti | 0.102916000  | -1.738296000 | -0.914669000 |
| C  | -1.848709000 | -1.566838000 | -5.122017000 |
| C  | -0.547973000 | -2.380157000 | -4.989581000 |
| C  | 0.423459000  | -1.619735000 | -4.109258000 |
| C  | -1.557875000 | -0.071947000 | -5.326481000 |
| C  | 1.855937000  | -1.462549000 | -4.516373000 |
| C  | -2.451571000 | 0.761394000  | -4.432490000 |
| H  | 2.309946000  | -2.462618000 | -4.358398000 |
| H  | -0.107257000 | -2.555433000 | -5.987154000 |
| H  | -2.354850000 | -1.691302000 | -4.151003000 |
| H  | -2.146638000 | 2.506544000  | -3.701658000 |
| H  | 1.904663000  | -1.238517000 | -5.594683000 |
| H  | 3.435725000  | -0.549205000 | -3.829138000 |
| H  | -2.274120000 | 0.436646000  | -3.386510000 |
| H  | -3.505775000 | 0.508785000  | -4.669384000 |
| H  | -1.194867000 | -3.463731000 | -3.531492000 |
| H  | -0.091506000 | 0.781388000  | -4.276817000 |
| H  | -2.346988000 | -1.999597000 | -6.938390000 |
| H  | -1.738817000 | 0.192563000  | -6.385927000 |
| O  | -2.735196000 | -2.104254000 | -6.061116000 |
| O  | 2.477923000  | -0.472495000 | -3.740663000 |
| O  | -2.179002000 | 2.124219000  | -4.593843000 |
| O  | 0.059371000  | -1.463046000 | -2.934328000 |

|   |              |              |              |
|---|--------------|--------------|--------------|
| O | -0.773675000 | -3.632735000 | -4.399878000 |
| O | -0.182008000 | 0.178537000  | -5.061943000 |

## Ti-NU-1000 Int2

|   |              |              |              |
|---|--------------|--------------|--------------|
| C | -3.248200000 | -2.182800000 | -1.650100000 |
| C | -3.229700000 | -2.386600000 | 2.900000000  |
| C | -3.232300000 | 2.034300000  | 3.104000000  |
| C | 3.276900000  | 2.142000000  | 2.939200000  |
| C | 3.226900000  | 2.366300000  | -1.338700000 |
| C | 3.259300000  | -2.277900000 | -1.561500000 |
| C | -3.265300000 | 2.236100000  | -1.457300000 |
| C | 3.257200000  | -2.506600000 | 2.716400000  |
| H | 4.105753000  | 2.664098000  | 3.464745000  |
| H | 4.121088000  | -3.067736000 | 3.139898000  |
| H | -4.067115000 | 2.533807000  | 3.645982000  |
| H | -4.048717000 | -2.941457000 | 3.406218000  |
| C | 5.699286000  | -2.531987000 | -2.046473000 |
| C | -5.676930000 | -2.090412000 | -2.264443000 |
| C | 4.377431000  | -2.917828000 | -2.301364000 |
| C | -4.408043000 | -2.654873000 | -2.450038000 |
| C | 4.111909000  | -3.901445000 | -3.264372000 |
| C | -4.217815000 | -3.631048000 | -3.435660000 |
| C | 5.160282000  | -4.491917000 | -3.964373000 |
| C | -5.283686000 | -4.033762000 | -4.234239000 |
| C | 6.476416000  | -4.104723000 | -3.706663000 |
| C | -6.545026000 | -3.466010000 | -4.050179000 |
| C | 6.744143000  | -3.125588000 | -2.748546000 |
| C | -6.740764000 | -2.496356000 | -3.064583000 |
| C | 5.698584000  | 2.748701000  | -1.507966000 |
| C | -5.710805000 | 2.675697000  | -1.719214000 |
| C | 4.398224000  | 3.094558000  | -1.897256000 |
| C | -4.388893000 | 3.027200000  | -2.021266000 |
| C | 4.202484000  | 4.134028000  | -2.815092000 |
| C | -4.134284000 | 4.128893000  | -2.847758000 |
| C | 5.294675000  | 4.819189000  | -3.339279000 |
| C | -5.190506000 | 4.869936000  | -3.367472000 |
| C | 6.588496000  | 4.472413000  | -2.947077000 |
| C | -6.506296000 | 4.513176000  | -3.068454000 |
| C | 6.788513000  | 3.438178000  | -2.031253000 |
| C | -6.764968000 | 3.416337000  | -2.245022000 |
| H | 5.882911000  | -1.763496000 | -1.293413000 |
| H | -5.802910000 | -1.328426000 | -1.492712000 |
| H | 3.075687000  | -4.193943000 | -3.453711000 |
| H | -3.221638000 | -4.060833000 | -3.564480000 |
| H | 4.951801000  | -5.259063000 | -4.713441000 |
| H | -5.128517000 | -4.787685000 | -5.009129000 |

|   |              |              |              |
|---|--------------|--------------|--------------|
| H | 7.774737000  | -2.823885000 | -2.549031000 |
| H | -7.729005000 | -2.052841000 | -2.923482000 |
| H | 5.830433000  | 1.936584000  | -0.790578000 |
| H | -5.888316000 | 1.818653000  | -1.067032000 |
| H | 3.183344000  | 4.389963000  | -3.112068000 |
| H | -3.099835000 | 4.396392000  | -3.073163000 |
| H | 5.138841000  | 5.627319000  | -4.057590000 |
| H | -4.988733000 | 5.729479000  | -4.010221000 |
| H | 7.801729000  | 3.168917000  | -1.724350000 |
| H | -7.795262000 | 3.139664000  | -2.010551000 |
| H | -7.381240000 | -3.779458000 | -4.679964000 |
| H | 7.298554000  | -4.569331000 | -4.256304000 |
| H | -7.335225000 | 5.094645000  | -3.479163000 |
| H | 7.445758000  | 5.011387000  | -3.357770000 |
| H | -1.865960000 | -2.831560000 | 0.548242000  |
| H | -0.891321000 | 1.477443000  | 4.647731000  |
| H | -0.053571000 | 0.137737000  | 4.509366000  |
| H | 0.015328000  | 3.718072000  | 0.444361000  |
| H | 0.738521000  | 3.835474000  | 2.636665000  |
| H | 0.905016000  | 3.817772000  | -0.848060000 |
| H | 1.897684000  | -0.188660000 | 3.396759000  |
| H | -1.901292000 | 2.611087000  | 0.783164000  |
| H | -0.687946000 | -2.080330000 | 4.632569000  |
| H | 0.915744000  | -4.039038000 | 2.274896000  |
| H | 0.745945000  | -4.061251000 | -1.259762000 |
| H | 0.084534000  | -3.926398000 | 0.933172000  |
| O | -1.072198000 | -0.122889000 | 2.058463000  |
| O | -3.571234000 | 1.262123000  | 2.150494000  |
| O | -3.553496000 | 1.329300000  | -0.599982000 |
| O | -3.576283000 | -1.513510000 | 2.045451000  |
| O | -2.044900000 | -2.659196000 | 3.211765000  |
| O | 0.032217000  | -3.817938000 | 1.923935000  |
| O | 2.100706000  | -2.877749000 | 3.000309000  |
| O | 2.070668000  | -2.613445000 | -1.829445000 |
| O | 3.557132000  | -1.514975000 | 1.974626000  |
| O | 3.546029000  | -1.389230000 | -0.688038000 |
| O | 3.604511000  | 1.258367000  | 2.090183000  |
| O | 3.481838000  | 1.358587000  | -0.577002000 |
| O | 2.062473000  | 2.731390000  | -1.621040000 |
| O | 2.095048000  | 2.461184000  | 3.223776000  |
| O | 1.042067000  | 1.302504000  | 0.700913000  |
| O | 1.349867000  | -0.126955000 | 2.601818000  |
| O | 0.013236000  | -1.555380000 | 4.217517000  |
| O | -0.013916000 | 1.128258000  | 4.402858000  |
| O | 1.052922000  | -1.480251000 | 0.664170000  |
| O | -1.339112000 | -2.026008000 | 0.644285000  |



|    |              |              |              |
|----|--------------|--------------|--------------|
| O  | -2.090394000 | -2.540531000 | -1.929590000 |
| O  | 0.040699000  | -3.648600000 | -0.739576000 |
| O  | -3.514139000 | -1.340721000 | -0.688447000 |
| O  | -0.000789000 | 3.440940000  | 2.147697000  |
| O  | -0.002080000 | 3.616842000  | -0.545947000 |
| O  | -1.352720000 | 1.816416000  | 0.730197000  |
| O  | -2.058507000 | 2.265677000  | 3.467533000  |
| O  | -2.077634000 | 2.464398000  | -1.830671000 |
| O  | 1.318132000  | -0.047601000 | -1.228605000 |
| O  | -1.080482000 | -0.082068000 | -0.757512000 |
| H  | 1.849086000  | -0.052038000 | -2.058789000 |
| O  | 0.071489000  | 1.584087000  | -2.903173000 |
| H  | -0.156846000 | 2.488313000  | -3.164324000 |
| Ti | 2.459261000  | -0.075096000 | 0.662404000  |
| Ti | -0.082926000 | -1.723287000 | 2.345372000  |
| Ti | 0.067938000  | 1.572695000  | 2.315798000  |
| Ti | -0.085960000 | 1.492743000  | -0.984414000 |
| Ti | -2.486893000 | -0.112093000 | 0.668157000  |
| Ti | 0.090304000  | -1.775330000 | -0.948408000 |
| C  | -1.686397000 | -1.883414000 | -5.173622000 |
| C  | -0.224400000 | -2.340451000 | -5.238903000 |
| C  | 0.542288000  | -1.579482000 | -4.175256000 |
| C  | -1.789018000 | -0.364254000 | -5.360550000 |
| C  | 1.885804000  | -0.999125000 | -4.514956000 |
| C  | -2.738978000 | 0.268688000  | -4.360350000 |
| H  | 2.616436000  | -1.819249000 | -4.383817000 |
| H  | 0.198642000  | -2.095592000 | -6.237135000 |
| H  | -2.037081000 | -2.163358000 | -4.166359000 |
| H  | -2.454050000 | 2.061186000  | -3.689353000 |
| H  | 1.898168000  | -0.737098000 | -5.585575000 |
| H  | 1.593346000  | 0.765727000  | -3.718947000 |
| H  | -2.406522000 | -0.019245000 | -3.341808000 |
| H  | -3.749841000 | -0.162040000 | -4.500718000 |
| H  | -0.964501000 | -4.099157000 | -5.281836000 |
| H  | -0.489574000 | 0.796065000  | -4.444138000 |
| H  | -2.284658000 | -2.353344000 | -6.960797000 |
| H  | -2.141795000 | -0.147111000 | -6.388555000 |
| O  | -2.472293000 | -2.646454000 | -6.059136000 |
| O  | 2.283624000  | 0.066794000  | -3.704632000 |
| O  | -2.742704000 | 1.660058000  | -4.523172000 |
| O  | 0.071818000  | -1.563519000 | -3.038473000 |
| O  | -0.132597000 | -3.711936000 | -4.969496000 |
| O  | -0.494138000 | 0.203225000  | -5.227364000 |

Ti-NU-1000 Int2\_Ro

|   |              |              |              |
|---|--------------|--------------|--------------|
| C | -3.248200000 | -2.182800000 | -1.650100000 |
|---|--------------|--------------|--------------|

|   |              |              |              |
|---|--------------|--------------|--------------|
| C | -3.229700000 | -2.386600000 | 2.900000000  |
| C | -3.232300000 | 2.034300000  | 3.104000000  |
| C | 3.276900000  | 2.142000000  | 2.939200000  |
| C | 3.226900000  | 2.366300000  | -1.338700000 |
| C | 3.259300000  | -2.277900000 | -1.561500000 |
| C | -3.265300000 | 2.236100000  | -1.457300000 |
| C | 3.257200000  | -2.506600000 | 2.716400000  |
| H | 4.111788000  | 2.668054000  | 3.450923000  |
| H | 4.121577000  | -3.072074000 | 3.133741000  |
| H | -4.072539000 | 2.521734000  | 3.649825000  |
| H | -4.035874000 | -2.950017000 | 3.418074000  |
| C | 5.698118000  | -2.643214000 | -1.971208000 |
| C | -5.733371000 | -2.418587000 | -1.867085000 |
| C | 4.368612000  | -2.958223000 | -2.278894000 |
| C | -4.449251000 | -2.879598000 | -2.184437000 |
| C | 4.090901000  | -3.910345000 | -3.268615000 |
| C | -4.296691000 | -3.994869000 | -3.017904000 |
| C | 5.133102000  | -4.540464000 | -3.942706000 |
| C | -5.417230000 | -4.643708000 | -3.525152000 |
| C | 6.456673000  | -4.223790000 | -3.632381000 |
| C | -6.696078000 | -4.176991000 | -3.213998000 |
| C | 6.737316000  | -3.275668000 | -2.647224000 |
| C | -6.852825000 | -3.063697000 | -2.387325000 |
| C | 5.679144000  | 2.797601000  | -1.614511000 |
| C | -5.701323000 | 2.791767000  | -1.619821000 |
| C | 4.357682000  | 3.105098000  | -1.961786000 |
| C | -4.382566000 | 3.043681000  | -2.018690000 |
| C | 4.102902000  | 4.111048000  | -2.902189000 |
| C | -4.120390000 | 4.038241000  | -2.969071000 |
| C | 5.159067000  | 4.802502000  | -3.488556000 |
| C | -5.170871000 | 4.761253000  | -3.530515000 |
| C | 6.474471000  | 4.495439000  | -3.137040000 |
| C | -6.485538000 | 4.499698000  | -3.139584000 |
| C | 6.732706000  | 3.493592000  | -2.199999000 |
| C | -6.748201000 | 3.518644000  | -2.180372000 |
| H | 5.891933000  | -1.898042000 | -1.197554000 |
| H | -5.831262000 | -1.548603000 | -1.214620000 |
| H | 3.049406000  | -4.147043000 | -3.498379000 |
| H | -3.290745000 | -4.338003000 | -3.267541000 |
| H | 4.914488000  | -5.283703000 | -4.712827000 |
| H | -5.295014000 | -5.514307000 | -4.173227000 |
| H | 7.773597000  | -3.028966000 | -2.405792000 |
| H | -7.853546000 | -2.699215000 | -2.144187000 |
| H | 5.856040000  | 2.008937000  | -0.880848000 |
| H | -5.880823000 | 2.011406000  | -0.877630000 |
| H | 3.067410000  | 4.333919000  | -3.167921000 |

|   |              |              |              |
|---|--------------|--------------|--------------|
| H | -3.083924000 | 4.230775000  | -3.255361000 |
| H | 4.958104000  | 5.584351000  | -4.224629000 |
| H | -4.965334000 | 5.536361000  | -4.272466000 |
| H | 7.762722000  | 3.254350000  | -1.925911000 |
| H | -7.776621000 | 3.319684000  | -1.870608000 |
| H | -7.575187000 | -4.684435000 | -3.618828000 |
| H | 7.274112000  | -4.719494000 | -4.161549000 |
| H | -7.308938000 | 5.066990000  | -3.580049000 |
| H | 7.303103000  | 5.039625000  | -3.596789000 |
| H | -1.858724000 | -2.804427000 | 0.536188000  |
| H | -0.901763000 | 1.485522000  | 4.647551000  |
| H | -0.061112000 | 0.147348000  | 4.522931000  |
| H | 0.055893000  | 3.763933000  | 0.495572000  |
| H | 0.740816000  | 3.845906000  | 2.690311000  |
| H | 0.878269000  | 3.915764000  | -0.845081000 |
| H | 1.889267000  | -0.197090000 | 3.426229000  |
| H | -1.878045000 | 2.647137000  | 0.806552000  |
| H | -0.693044000 | -2.081033000 | 4.635619000  |
| H | 0.921865000  | -4.015947000 | 2.226216000  |
| H | 0.717840000  | -3.992018000 | -1.311170000 |
| H | 0.079457000  | -3.886595000 | 0.893168000  |
| O | -1.064727000 | -0.104213000 | 2.064269000  |
| O | -3.563091000 | 1.274253000  | 2.139718000  |
| O | -3.559062000 | 1.339979000  | -0.591900000 |
| O | -3.586510000 | -1.522306000 | 2.046670000  |
| O | -2.036881000 | -2.650887000 | 3.204479000  |
| O | 0.034043000  | -3.796626000 | 1.884833000  |
| O | 2.101363000  | -2.881014000 | 2.995411000  |
| O | 2.062016000  | -2.565989000 | -1.856436000 |
| O | 3.560163000  | -1.506031000 | 1.986762000  |
| O | 3.560393000  | -1.404938000 | -0.678388000 |
| O | 3.601320000  | 1.259300000  | 2.086156000  |
| O | 3.524965000  | 1.376023000  | -0.574793000 |
| O | 2.043859000  | 2.714485000  | -1.577452000 |
| O | 2.100168000  | 2.453840000  | 3.242574000  |
| O | 1.074483000  | 1.326906000  | 0.735787000  |
| O | 1.352985000  | -0.124681000 | 2.624492000  |
| O | 0.007150000  | -1.551183000 | 4.224952000  |
| O | -0.018741000 | 1.137524000  | 4.419202000  |
| O | 1.068515000  | -1.459850000 | 0.675606000  |
| O | -1.338326000 | -1.994209000 | 0.626691000  |
| O | -2.102965000 | -2.441554000 | -2.062081000 |
| O | 0.011167000  | -3.580267000 | -0.792586000 |
| O | -3.478533000 | -1.314703000 | -0.705850000 |
| O | 0.011449000  | 3.455381000  | 2.184456000  |
| O | -0.000543000 | 3.677541000  | -0.495901000 |

|    |              |              |              |
|----|--------------|--------------|--------------|
| O  | -1.334152000 | 1.850639000  | 0.735020000  |
| O  | -2.062118000 | 2.270023000  | 3.476953000  |
| O  | -2.083397000 | 2.466920000  | -1.828992000 |
| O  | 1.366417000  | 0.000064000  | -1.198158000 |
| O  | -1.045703000 | -0.041818000 | -0.731075000 |
| H  | 1.875444000  | 0.000786000  | -2.039449000 |
| O  | 0.059004000  | 1.627530000  | -2.830595000 |
| H  | -0.774539000 | 1.931835000  | -3.216744000 |
| Ti | 2.479713000  | -0.055269000 | 0.685705000  |
| Ti | -0.094368000 | -1.705303000 | 2.352478000  |
| Ti | 0.080648000  | 1.581289000  | 2.330790000  |
| Ti | -0.050628000 | 1.579310000  | -0.965466000 |
| Ti | -2.462903000 | -0.083100000 | 0.636585000  |
| Ti | 0.119928000  | -1.697667000 | -0.932343000 |
| C  | -1.605882000 | -0.684945000 | -5.653952000 |
| C  | -0.581511000 | -1.773599000 | -5.237420000 |
| C  | 0.366003000  | -1.199684000 | -4.202086000 |
| C  | -2.689483000 | -0.447186000 | -4.601985000 |
| C  | 1.617534000  | -0.511205000 | -4.659636000 |
| C  | -3.435437000 | 0.861606000  | -4.812668000 |
| H  | 2.324893000  | -1.337844000 | -4.868573000 |
| H  | 0.010803000  | -2.010773000 | -6.139687000 |
| H  | -2.124786000 | -1.064143000 | -6.555066000 |
| H  | -5.067867000 | 1.597483000  | -4.028562000 |
| H  | 1.414192000  | -0.039711000 | -5.637253000 |
| H  | 1.535116000  | 1.067843000  | -3.572674000 |
| H  | -3.730502000 | 0.962175000  | -5.880015000 |
| H  | -2.792867000 | 1.725883000  | -4.553467000 |
| H  | -1.586001000 | -2.778216000 | -3.915521000 |
| H  | -4.381063000 | -1.268381000 | -4.216091000 |
| H  | -1.392035000 | 1.059676000  | -6.505456000 |
| H  | -2.235992000 | -0.403158000 | -3.584295000 |
| O  | -0.865126000 | 0.489547000  | -5.935904000 |
| O  | 2.200039000  | 0.357259000  | -3.746186000 |
| O  | -4.561426000 | 0.779514000  | -3.977139000 |
| O  | 0.082483000  | -1.372682000 | -3.027463000 |
| O  | -1.166149000 | -2.941425000 | -4.787023000 |
| O  | -3.588361000 | -1.518599000 | -4.713336000 |

## Ti-NU-1000 TS3

|   |              |              |              |
|---|--------------|--------------|--------------|
| C | -3.248200000 | -2.182800000 | -1.650100000 |
| C | -3.229700000 | -2.386600000 | 2.900000000  |
| C | -3.232300000 | 2.034300000  | 3.104000000  |
| C | 3.276900000  | 2.142000000  | 2.939200000  |
| C | 3.226900000  | 2.366300000  | -1.338700000 |
| C | 3.259300000  | -2.277900000 | -1.561500000 |

|   |              |              |              |
|---|--------------|--------------|--------------|
| C | -3.265300000 | 2.236100000  | -1.457300000 |
| C | 3.257200000  | -2.506600000 | 2.716400000  |
| H | 4.100694000  | 2.701021000  | 3.434525000  |
| H | 4.114268000  | -3.091247000 | 3.120463000  |
| H | -4.093629000 | 2.539065000  | 3.597323000  |
| H | -4.061031000 | -2.947109000 | 3.380068000  |
| C | 5.701093000  | -2.582296000 | -2.016575000 |
| C | -5.414633000 | -1.459919000 | -2.662993000 |
| C | 4.373526000  | -2.924881000 | -2.301500000 |
| C | -4.407632000 | -2.428049000 | -2.560367000 |
| C | 4.097985000  | -3.876334000 | -3.292761000 |
| C | -4.467262000 | -3.580143000 | -3.353552000 |
| C | 5.140623000  | -4.479172000 | -3.990358000 |
| C | -5.527233000 | -3.765159000 | -4.237955000 |
| C | 6.462546000  | -4.135633000 | -3.702112000 |
| C | -6.525263000 | -2.793249000 | -4.346194000 |
| C | 6.740926000  | -3.187763000 | -2.716113000 |
| C | -6.464984000 | -1.637284000 | -3.561291000 |
| C | 5.661954000  | 2.896646000  | -1.566225000 |
| C | -5.705448000 | 2.346089000  | -2.027246000 |
| C | 4.335580000  | 3.166347000  | -1.926597000 |
| C | -4.391074000 | 2.758797000  | -2.280896000 |
| C | 4.060335000  | 4.193058000  | -2.838254000 |
| C | -4.132048000 | 3.624044000  | -3.350823000 |
| C | 5.099772000  | 4.941185000  | -3.383797000 |
| C | -5.172412000 | 4.058420000  | -4.167998000 |
| C | 6.419684000  | 4.669915000  | -3.020330000 |
| C | -6.478849000 | 3.634766000  | -3.918838000 |
| C | 6.698878000  | 3.648036000  | -2.111379000 |
| C | -6.744413000 | 2.783379000  | -2.844684000 |
| H | 5.893476000  | -1.837431000 | -1.242315000 |
| H | -5.340409000 | -0.567594000 | -2.035993000 |
| H | 3.056883000  | -4.131740000 | -3.504919000 |
| H | -3.677219000 | -4.329320000 | -3.269875000 |
| H | 4.923970000  | -5.221086000 | -4.762267000 |
| H | -5.577433000 | -4.670675000 | -4.846598000 |
| H | 7.775955000  | -2.919688000 | -2.492796000 |
| H | -7.241719000 | -0.872724000 | -3.649931000 |
| H | 5.854962000  | 2.092520000  | -0.853669000 |
| H | -5.889571000 | 1.682834000  | -1.179440000 |
| H | 3.022243000  | 4.389005000  | -3.114210000 |
| H | -3.103298000 | 3.945969000  | -3.527164000 |
| H | 4.882092000  | 5.739370000  | -4.097207000 |
| H | -4.966505000 | 4.731436000  | -5.003602000 |
| H | 7.732352000  | 3.436930000  | -1.827322000 |
| H | -7.769116000 | 2.462157000  | -2.642674000 |

|   |              |              |              |
|---|--------------|--------------|--------------|
| H | -7.358549000 | -2.941313000 | -5.038710000 |
| H | 7.280566000  | -4.609569000 | -4.249975000 |
| H | -7.294641000 | 3.974463000  | -4.561378000 |
| H | 7.235146000  | 5.258026000  | -3.448344000 |
| H | -1.840854000 | -2.785814000 | 0.574102000  |
| H | -0.913035000 | 1.452878000  | 4.697517000  |
| H | -0.062315000 | 0.121340000  | 4.558818000  |
| H | 0.092925000  | 3.778442000  | 0.570618000  |
| H | 0.751239000  | 3.845779000  | 2.772462000  |
| H | 0.981206000  | 3.867045000  | -0.735007000 |
| H | 1.903410000  | -0.199287000 | 3.479485000  |
| H | -1.822353000 | 2.679715000  | 0.812521000  |
| H | -0.706875000 | -2.087125000 | 4.634232000  |
| H | 0.891980000  | -4.059127000 | 2.316451000  |
| H | 0.808858000  | -4.044986000 | -1.175075000 |
| H | 0.098731000  | -3.894345000 | 0.952836000  |
| O | -1.041544000 | -0.094832000 | 2.109970000  |
| O | -3.533573000 | 1.250672000  | 2.143172000  |
| O | -3.547216000 | 1.334058000  | -0.585112000 |
| O | -3.560915000 | -1.502244000 | 2.047248000  |
| O | -2.053116000 | -2.658506000 | 3.232232000  |
| O | 0.028129000  | -3.798164000 | 1.950563000  |
| O | 2.099178000  | -2.852381000 | 3.014301000  |
| O | 2.071497000  | -2.597103000 | -1.828198000 |
| O | 3.574477000  | -1.513441000 | 1.980819000  |
| O | 3.560993000  | -1.396438000 | -0.679236000 |
| O | 3.611132000  | 1.260220000  | 2.096796000  |
| O | 3.539698000  | 1.389410000  | -0.578732000 |
| O | 2.027236000  | 2.672342000  | -1.608944000 |
| O | 2.095651000  | 2.431595000  | 3.264477000  |
| O | 1.094576000  | 1.324266000  | 0.777429000  |
| O | 1.373068000  | -0.127277000 | 2.673947000  |
| O | 0.014411000  | -1.566943000 | 4.247839000  |
| O | -0.025792000 | 1.115470000  | 4.472232000  |
| O | 1.107463000  | -1.446512000 | 0.712174000  |
| O | -1.304883000 | -1.986215000 | 0.670582000  |
| O | -2.151508000 | -2.737692000 | -1.854963000 |
| O | 0.095367000  | -3.632159000 | -0.668643000 |
| O | -3.463710000 | -1.332617000 | -0.705084000 |
| O | 0.023016000  | 3.456412000  | 2.263816000  |
| O | 0.079457000  | 3.669325000  | -0.419295000 |
| O | -1.300821000 | 1.864939000  | 0.815280000  |
| O | -2.079289000 | 2.264676000  | 3.519500000  |
| O | -2.089655000 | 2.624611000  | -1.678941000 |
| O | 1.351708000  | -0.013081000 | -1.187168000 |
| O | -1.046685000 | -0.010132000 | -0.673851000 |

|    |              |              |              |
|----|--------------|--------------|--------------|
| H  | 1.818582000  | 0.006162000  | -2.054377000 |
| O  | -0.095437000 | 1.539522000  | -2.844609000 |
| H  | -0.346491000 | 2.443707000  | -3.085290000 |
| Ti | 2.492356000  | -0.124361000 | 0.699078000  |
| Ti | -0.046130000 | -1.710159000 | 2.368185000  |
| Ti | 0.107577000  | 1.581055000  | 2.397331000  |
| Ti | -0.013147000 | 1.540926000  | -0.825969000 |
| Ti | -2.452155000 | -0.073506000 | 0.723303000  |
| Ti | 0.109594000  | -1.753434000 | -0.963716000 |
| C  | -1.812159000 | -0.076712000 | -4.806903000 |
| C  | -0.539133000 | -2.377232000 | -4.914502000 |
| C  | 0.266228000  | -1.618411000 | -4.091463000 |
| C  | -2.900895000 | -0.741412000 | -5.551469000 |
| C  | 1.538037000  | -0.975815000 | -4.589306000 |
| C  | -4.145165000 | 0.162218000  | -5.630035000 |
| H  | 2.346716000  | -1.724855000 | -4.537923000 |
| H  | -0.366119000 | -2.440266000 | -5.991189000 |
| H  | -1.014927000 | 0.435446000  | -5.373584000 |
| H  | -5.528167000 | -1.163383000 | -5.858885000 |
| H  | 1.427116000  | -0.726939000 | -5.663253000 |
| H  | 1.254561000  | 0.770877000  | -3.718928000 |
| H  | -3.886642000 | 1.100387000  | -6.145509000 |
| H  | -4.495997000 | 0.419390000  | -4.614290000 |
| H  | -1.630990000 | -3.048891000 | -3.483069000 |
| H  | -3.271035000 | -1.236179000 | -7.346786000 |
| H  | -1.171728000 | 0.788582000  | -3.172613000 |
| H  | -3.194323000 | -1.644919000 | -4.968847000 |
| O  | -2.001809000 | 0.183838000  | -3.581120000 |
| O  | 1.981221000  | 0.120616000  | -3.835171000 |
| O  | -5.120521000 | -0.476371000 | -6.407931000 |
| O  | -0.048792000 | -1.532921000 | -2.833094000 |
| O  | -1.511887000 | -3.162928000 | -4.465558000 |
| O  | -2.463818000 | -1.070326000 | -6.837897000 |

## Ti-NU-1000 Int3

|   |              |              |              |
|---|--------------|--------------|--------------|
| C | -3.248200000 | -2.182800000 | -1.650100000 |
| C | -3.229700000 | -2.386600000 | 2.900000000  |
| C | -3.232300000 | 2.034300000  | 3.104000000  |
| C | 3.276900000  | 2.142000000  | 2.939200000  |
| C | 3.226900000  | 2.366300000  | -1.338700000 |
| C | 3.259300000  | -2.277900000 | -1.561500000 |
| C | -3.265300000 | 2.236100000  | -1.457300000 |
| C | 3.257200000  | -2.506600000 | 2.716400000  |
| H | 4.090088000  | 2.718433000  | 3.433761000  |
| H | 4.129249000  | -3.040576000 | 3.156348000  |
| H | -4.076042000 | 2.532367000  | 3.633283000  |

|   |              |              |              |
|---|--------------|--------------|--------------|
| H | -4.037022000 | -2.947712000 | 3.419605000  |
| C | 5.715182000  | -2.529997000 | -1.983395000 |
| C | -5.716161000 | -2.435961000 | -2.016494000 |
| C | 4.398953000  | -2.905175000 | -2.279796000 |
| C | -4.411592000 | -2.884495000 | -2.261137000 |
| C | 4.156304000  | -3.872701000 | -3.264118000 |
| C | -4.200752000 | -3.976311000 | -3.110652000 |
| C | 5.219907000  | -4.459943000 | -3.942850000 |
| C | -5.282628000 | -4.612287000 | -3.712370000 |
| C | 6.530487000  | -4.084258000 | -3.642983000 |
| C | -6.579106000 | -4.149917000 | -3.483617000 |
| C | 6.776235000  | -3.119744000 | -2.664477000 |
| C | -6.795034000 | -3.059122000 | -2.637131000 |
| C | 5.640206000  | 2.961857000  | -1.590832000 |
| C | -5.733343000 | 2.404771000  | -1.852110000 |
| C | 4.303953000  | 3.203614000  | -1.934147000 |
| C | -4.438653000 | 2.862765000  | -2.124731000 |
| C | 3.995739000  | 4.232523000  | -2.832591000 |
| C | -4.247771000 | 3.905430000  | -3.040181000 |
| C | 5.011534000  | 5.010100000  | -3.381803000 |
| C | -5.341025000 | 4.476536000  | -3.685226000 |
| C | 6.341159000  | 4.765997000  | -3.035364000 |
| C | -6.631434000 | 4.012931000  | -3.415127000 |
| C | 6.653524000  | 3.742000000  | -2.139668000 |
| C | -6.825732000 | 2.980183000  | -2.496345000 |
| H | 5.882354000  | -1.772838000 | -1.215266000 |
| H | -5.860903000 | -1.584155000 | -1.348274000 |
| H | 3.123469000  | -4.151700000 | -3.486364000 |
| H | -3.179912000 | -4.315187000 | -3.297403000 |
| H | 5.028505000  | -5.214418000 | -4.709235000 |
| H | -5.114133000 | -5.465742000 | -4.372563000 |
| H | 7.802434000  | -2.826319000 | -2.432326000 |
| H | -7.810160000 | -2.697599000 | -2.457220000 |
| H | 5.858759000  | 2.155271000  | -0.888475000 |
| H | -5.860223000 | 1.590120000  | -1.136322000 |
| H | 2.950966000  | 4.409213000  | -3.096032000 |
| H | -3.231120000 | 4.254046000  | -3.233025000 |
| H | 4.767578000  | 5.810323000  | -4.084361000 |
| H | -5.191327000 | 5.290610000  | -4.398251000 |
| H | 7.694596000  | 3.551852000  | -1.868932000 |
| H | -7.834306000 | 2.618672000  | -2.281581000 |
| H | -7.427533000 | -4.643751000 | -3.964132000 |
| H | 7.365247000  | -4.545860000 | -4.175984000 |
| H | -7.489276000 | 4.468621000  | -3.916780000 |
| H | 7.138107000  | 5.376968000  | -3.466171000 |
| H | -1.913393000 | -2.730364000 | 0.564744000  |



|    |              |              |              |
|----|--------------|--------------|--------------|
| H  | -0.926013000 | 1.404915000  | 4.703049000  |
| H  | -0.072999000 | 0.073883000  | 4.530815000  |
| H  | 0.094045000  | 3.795509000  | 0.575128000  |
| H  | 0.779088000  | 3.820917000  | 2.753402000  |
| H  | 0.996018000  | 3.898986000  | -0.720271000 |
| H  | 1.876722000  | -0.224166000 | 3.451817000  |
| H  | -1.805005000 | 2.705979000  | 0.787248000  |
| H  | -0.690837000 | -2.128149000 | 4.583365000  |
| H  | 0.893725000  | -4.030974000 | 2.163355000  |
| H  | 0.648770000  | -4.041093000 | -1.325899000 |
| H  | 0.063596000  | -3.841664000 | 0.819273000  |
| O  | -1.058727000 | -0.078712000 | 2.070273000  |
| O  | -3.552579000 | 1.285823000  | 2.127306000  |
| O  | -3.518642000 | 1.299199000  | -0.607369000 |
| O  | -3.590378000 | -1.501620000 | 2.066560000  |
| O  | -2.037805000 | -2.670277000 | 3.178971000  |
| O  | 0.019093000  | -3.771982000 | 1.823453000  |
| O  | 2.108164000  | -2.895425000 | 2.976085000  |
| O  | 2.085729000  | -2.619091000 | -1.830549000 |
| O  | 3.556577000  | -1.509906000 | 1.970635000  |
| O  | 3.542261000  | -1.382504000 | -0.677531000 |
| O  | 3.617265000  | 1.258700000  | 2.108059000  |
| O  | 3.557271000  | 1.407746000  | -0.583562000 |
| O  | 2.008309000  | 2.647261000  | -1.617273000 |
| O  | 2.088386000  | 2.424125000  | 3.264660000  |
| O  | 1.090123000  | 1.333424000  | 0.772262000  |
| O  | 1.352388000  | -0.139667000 | 2.643500000  |
| O  | 0.008250000  | -1.583326000 | 4.190893000  |
| O  | -0.040310000 | 1.073123000  | 4.464157000  |
| O  | 1.073679000  | -1.438513000 | 0.658807000  |
| O  | -1.360016000 | -1.938686000 | 0.607326000  |
| O  | -2.088799000 | -2.420105000 | -2.048348000 |
| O  | -0.015432000 | -3.587661000 | -0.789331000 |
| O  | -3.513681000 | -1.339326000 | -0.707436000 |
| O  | 0.027259000  | 3.457399000  | 2.258082000  |
| O  | 0.092463000  | 3.691536000  | -0.417815000 |
| O  | -1.296034000 | 1.883278000  | 0.796355000  |
| O  | -2.066596000 | 2.246996000  | 3.507916000  |
| O  | -2.100512000 | 2.623265000  | -1.715794000 |
| O  | 1.357495000  | 0.018601000  | -1.225643000 |
| O  | -1.039779000 | 0.038067000  | -0.739500000 |
| H  | 1.860212000  | 0.081863000  | -2.073798000 |
| O  | -0.049863000 | 1.648929000  | -2.988790000 |
| H  | -0.242220000 | 2.582829000  | -3.162756000 |
| Ti | 2.470383000  | -0.193796000 | 0.692272000  |
| Ti | -0.087176000 | -1.703973000 | 2.303999000  |

|    |              |              |              |
|----|--------------|--------------|--------------|
| Ti | 0.082352000  | 1.579757000  | 2.410169000  |
| Ti | 0.052561000  | 1.554478000  | -0.786125000 |
| Ti | -2.460601000 | -0.053629000 | 0.653409000  |
| Ti | 0.058471000  | -1.708951000 | -1.123926000 |
| C  | -3.062960000 | 0.023473000  | -4.739260000 |
| C  | -0.391371000 | -1.920536000 | -5.135892000 |
| C  | 0.481766000  | -1.455781000 | -4.205345000 |
| C  | -4.493291000 | -0.332083000 | -4.450358000 |
| C  | 1.868265000  | -0.988487000 | -4.518408000 |
| C  | -5.426227000 | 0.786276000  | -4.896766000 |
| H  | 2.610670000  | -1.754964000 | -4.246025000 |
| H  | -0.170490000 | -1.907619000 | -6.205586000 |
| H  | -2.676110000 | -0.301239000 | -5.735089000 |
| H  | -7.341859000 | 1.053869000  | -4.776904000 |
| H  | 1.964382000  | -0.835311000 | -5.608770000 |
| H  | 1.563094000  | 0.845800000  | -3.889901000 |
| H  | -5.338409000 | 0.911246000  | -5.994646000 |
| H  | -5.134609000 | 1.738939000  | -4.419939000 |
| H  | -1.684723000 | -2.460522000 | -3.842171000 |
| H  | -5.718776000 | -1.728023000 | -4.906940000 |
| H  | -0.873859000 | 1.195107000  | -3.299635000 |
| H  | -4.592473000 | -0.411849000 | -3.346149000 |
| O  | -2.389464000 | 0.663425000  | -3.961160000 |
| O  | 2.255688000  | 0.170775000  | -3.795626000 |
| O  | -6.716155000 | 0.368737000  | -4.521557000 |
| O  | 0.079630000  | -1.473514000 | -2.939569000 |
| O  | -1.589239000 | -2.435284000 | -4.825006000 |
| O  | -4.795541000 | -1.525546000 | -5.111031000 |

## Ti-NU-1000 TS4

|   |              |              |              |
|---|--------------|--------------|--------------|
| C | -3.248200000 | -2.182800000 | -1.650100000 |
| C | -3.229700000 | -2.386600000 | 2.900000000  |
| C | -3.232300000 | 2.034300000  | 3.104000000  |
| C | 3.276900000  | 2.142000000  | 2.939200000  |
| C | 3.226900000  | 2.366300000  | -1.338700000 |
| C | 3.259300000  | -2.277900000 | -1.561500000 |
| C | -3.265300000 | 2.236100000  | -1.457300000 |
| C | 3.257200000  | -2.506600000 | 2.716400000  |
| H | 4.093815000  | 2.676904000  | 3.471202000  |
| H | 4.127680000  | -3.047160000 | 3.152902000  |
| H | -4.080821000 | 2.516303000  | 3.640870000  |
| H | -4.040377000 | -2.958056000 | 3.401946000  |
| C | 5.624523000  | -2.043337000 | -2.368959000 |
| C | -5.691966000 | -2.287064000 | -2.176900000 |
| C | 4.388066000  | -2.700631000 | -2.440739000 |
| C | -4.389699000 | -2.742033000 | -2.420539000 |

|   |              |              |              |
|---|--------------|--------------|--------------|
| C | 4.202274000  | -3.730146000 | -3.373526000 |
| C | -4.157729000 | -3.683546000 | -3.429686000 |
| C | 5.241787000  | -4.099463000 | -4.223162000 |
| C | -5.219346000 | -4.166647000 | -4.188322000 |
| C | 6.470230000  | -3.440172000 | -4.150222000 |
| C | -6.514812000 | -3.703610000 | -3.951380000 |
| C | 6.659664000  | -2.412459000 | -3.224699000 |
| C | -6.750964000 | -2.762831000 | -2.945870000 |
| C | 5.674900000  | 2.897996000  | -1.403575000 |
| C | -5.707150000 | 2.741939000  | -1.609877000 |
| C | 4.378574000  | 3.140587000  | -1.875763000 |
| C | -4.393662000 | 3.031390000  | -2.005824000 |
| C | 4.166764000  | 4.119298000  | -2.854736000 |
| C | -4.148270000 | 4.091073000  | -2.886451000 |
| C | 5.241964000  | 4.845374000  | -3.359390000 |
| C | -5.210492000 | 4.847869000  | -3.373338000 |
| C | 6.531927000  | 4.603242000  | -2.884230000 |
| C | -6.518838000 | 4.551091000  | -2.986399000 |
| C | 6.746591000  | 3.631221000  | -1.905438000 |
| C | -6.767173000 | 3.498943000  | -2.102386000 |
| H | 5.750105000  | -1.245892000 | -1.632837000 |
| H | -5.847982000 | -1.549196000 | -1.386383000 |
| H | 3.232815000  | -4.232424000 | -3.414963000 |
| H | -3.134471000 | -4.018836000 | -3.610899000 |
| H | 5.096080000  | -4.905691000 | -4.945646000 |
| H | -5.037476000 | -4.900026000 | -4.976886000 |
| H | 7.621838000  | -1.898692000 | -3.168044000 |
| H | -7.763904000 | -2.394177000 | -2.768803000 |
| H | 5.816708000  | 2.135091000  | -0.635165000 |
| H | -5.869237000 | 1.925804000  | -0.900546000 |
| H | 3.149918000  | 4.291379000  | -3.213847000 |
| H | -3.120468000 | 4.301202000  | -3.184100000 |
| H | 5.075447000  | 5.604905000  | -4.126735000 |
| H | -5.019139000 | 5.673098000  | -4.062746000 |
| H | 7.756224000  | 3.446802000  | -1.531064000 |
| H | -7.791278000 | 3.272357000  | -1.796465000 |
| H | -7.346266000 | -4.075994000 | -4.554706000 |
| H | 7.284855000  | -3.729796000 | -4.818161000 |
| H | -7.350139000 | 5.145440000  | -3.372881000 |
| H | 7.374738000  | 5.176490000  | -3.278164000 |
| H | -1.919095000 | -2.803352000 | 0.598762000  |
| H | -0.893056000 | 1.479574000  | 4.631698000  |
| H | -0.049618000 | 0.143175000  | 4.505797000  |
| H | 0.076590000  | 3.747771000  | 0.463250000  |
| H | 0.741273000  | 3.844989000  | 2.672323000  |
| H | 0.907181000  | 3.848261000  | -0.878949000 |

|    |              |              |              |
|----|--------------|--------------|--------------|
| H  | 1.906264000  | -0.198267000 | 3.387770000  |
| H  | -1.863557000 | 2.654706000  | 0.780268000  |
| H  | -0.677605000 | -2.078048000 | 4.630495000  |
| H  | 0.912022000  | -4.021413000 | 2.261062000  |
| H  | 0.683850000  | -4.071130000 | -1.208195000 |
| H  | 0.045279000  | -3.914939000 | 0.936542000  |
| O  | -1.070647000 | -0.100929000 | 2.066849000  |
| O  | -3.555850000 | 1.269679000  | 2.135393000  |
| O  | -3.557715000 | 1.291229000  | -0.634895000 |
| O  | -3.586360000 | -1.508154000 | 2.057922000  |
| O  | -2.041185000 | -2.650026000 | 3.209963000  |
| O  | 0.021331000  | -3.801311000 | 1.929035000  |
| O  | 2.105149000  | -2.881770000 | 3.004180000  |
| O  | 2.135391000  | -2.800601000 | -1.689531000 |
| O  | 3.549583000  | -1.528223000 | 1.950258000  |
| O  | 3.509503000  | -1.332641000 | -0.723968000 |
| O  | 3.616171000  | 1.264067000  | 2.093924000  |
| O  | 3.500775000  | 1.351349000  | -0.597749000 |
| O  | 2.052406000  | 2.702521000  | -1.627491000 |
| O  | 2.088616000  | 2.450570000  | 3.221440000  |
| O  | 1.051799000  | 1.301348000  | 0.690516000  |
| O  | 1.356256000  | -0.132644000 | 2.594773000  |
| O  | 0.018330000  | -1.548215000 | 4.212907000  |
| O  | -0.010233000 | 1.133691000  | 4.400479000  |
| O  | 1.027811000  | -1.466485000 | 0.645924000  |
| O  | -1.369325000 | -2.009636000 | 0.650630000  |
| O  | -2.069581000 | -2.428250000 | -2.001767000 |
| O  | -0.045133000 | -3.660456000 | -0.719592000 |
| O  | -3.540386000 | -1.394579000 | -0.670695000 |
| O  | 0.016555000  | 3.449476000  | 2.163004000  |
| O  | 0.020446000  | 3.642143000  | -0.524333000 |
| O  | -1.338571000 | 1.843265000  | 0.737226000  |
| O  | -2.067265000 | 2.274338000  | 3.480541000  |
| O  | -2.078054000 | 2.523603000  | -1.759319000 |
| O  | 1.273691000  | -0.040220000 | -1.288333000 |
| O  | -1.095589000 | -0.063308000 | -0.729142000 |
| H  | 1.857816000  | 0.009522000  | -2.075976000 |
| O  | -0.066444000 | 1.634127000  | -2.912818000 |
| H  | -0.844961000 | 2.163900000  | -3.166062000 |
| Ti | 2.444792000  | -0.110681000 | 0.643773000  |
| Ti | -0.092954000 | -1.709294000 | 2.340515000  |
| Ti | 0.097111000  | 1.580505000  | 2.314061000  |
| Ti | -0.092040000 | 1.534428000  | -0.964759000 |
| Ti | -2.476928000 | -0.084123000 | 0.675623000  |
| Ti | 0.032377000  | -1.793442000 | -0.974166000 |
| C  | -0.556660000 | -0.348486000 | -4.595553000 |

|   |              |              |              |
|---|--------------|--------------|--------------|
| C | 0.479115000  | -1.103989000 | -4.021291000 |
| C | 1.892126000  | -0.988066000 | -4.529322000 |
| H | 2.278254000  | -2.016301000 | -4.645776000 |
| H | -0.457486000 | 0.051147000  | -5.611907000 |
| H | 1.895469000  | -0.508675000 | -5.523247000 |
| H | 3.586514000  | -0.566947000 | -3.616338000 |
| H | -1.830497000 | -1.287395000 | -3.510215000 |
| H | -0.116484000 | 0.641810000  | -3.822122000 |
| O | 2.674466000  | -0.245758000 | -3.613992000 |
| O | 0.213699000  | -1.768494000 | -2.974759000 |
| O | -1.838292000 | -0.607738000 | -4.219596000 |
| C | -3.454804000 | 1.084472000  | -5.338989000 |
| C | -4.594165000 | 0.452705000  | -4.583832000 |
| C | -5.870317000 | 1.279582000  | -4.721076000 |
| H | -3.177584000 | 0.526121000  | -6.274060000 |
| H | -6.751382000 | 0.848439000  | -3.064966000 |
| H | -6.181059000 | 1.290560000  | -5.777552000 |
| H | -5.686377000 | 2.324289000  | -4.415027000 |
| H | -5.621518000 | -1.159450000 | -4.690353000 |
| H | -4.305217000 | 0.450985000  | -3.506251000 |
| O | -2.908954000 | 2.110867000  | -5.014395000 |
| O | -6.919715000 | 0.677776000  | -4.001046000 |
| O | -4.791071000 | -0.841995000 | -5.074235000 |

## Ti-NU-1000 Prod

|   |              |              |              |
|---|--------------|--------------|--------------|
| C | -3.248200000 | -2.182800000 | -1.650100000 |
| C | -3.229700000 | -2.386600000 | 2.900000000  |
| C | -3.232300000 | 2.034300000  | 3.104000000  |
| C | 3.276900000  | 2.142000000  | 2.939200000  |
| C | 3.226900000  | 2.366300000  | -1.338700000 |
| C | 3.259300000  | -2.277900000 | -1.561500000 |
| C | -3.265300000 | 2.236100000  | -1.457300000 |
| C | 3.257200000  | -2.506600000 | 2.716400000  |
| H | 4.104092000  | 2.668816000  | 3.462364000  |
| H | 4.119434000  | -3.077350000 | 3.130481000  |
| H | -4.089549000 | 2.504910000  | 3.637597000  |
| H | -4.037143000 | -2.963782000 | 3.400746000  |
| C | 5.687548000  | -2.479098000 | -2.131355000 |
| C | -5.715189000 | -2.384704000 | -2.003527000 |
| C | 4.367956000  | -2.903718000 | -2.328764000 |
| C | -4.417945000 | -2.808360000 | -2.321622000 |
| C | 4.093901000  | -3.911246000 | -3.263264000 |
| C | -4.229205000 | -3.789841000 | -3.302498000 |
| C | 5.129939000  | -4.487279000 | -3.992790000 |
| C | -5.326589000 | -4.339118000 | -3.958770000 |
| C | 6.443771000  | -4.058813000 | -3.794782000 |

|   |              |              |              |
|---|--------------|--------------|--------------|
| C | -6.615786000 | -3.909719000 | -3.644444000 |
| C | 6.720612000  | -3.055617000 | -2.864784000 |
| C | -6.809000000 | -2.933073000 | -2.665603000 |
| C | 5.669900000  | 2.880041000  | -1.531517000 |
| C | -5.710950000 | 2.754255000  | -1.608332000 |
| C | 4.351940000  | 3.137760000  | -1.929330000 |
| C | -4.394971000 | 3.052657000  | -1.979234000 |
| C | 4.095036000  | 4.127624000  | -2.886139000 |
| C | -4.140238000 | 4.122711000  | -2.846706000 |
| C | 5.146768000  | 4.852314000  | -3.439345000 |
| C | -5.197211000 | 4.878567000  | -3.349464000 |
| C | 6.458532000  | 4.595683000  | -3.037296000 |
| C | -6.511094000 | 4.575043000  | -2.978506000 |
| C | 6.718427000  | 3.610309000  | -2.083307000 |
| C | -6.764948000 | 3.515870000  | -2.105744000 |
| H | 5.878732000  | -1.692702000 | -1.398906000 |
| H | -5.841036000 | -1.618976000 | -1.235032000 |
| H | 3.059839000  | -4.237297000 | -3.400683000 |
| H | -3.217133000 | -4.118250000 | -3.550293000 |
| H | 4.915249000  | -5.276219000 | -4.717262000 |
| H | -5.175332000 | -5.104823000 | -4.722711000 |
| H | 7.749229000  | -2.721828000 | -2.711433000 |
| H | -7.819782000 | -2.601217000 | -2.416334000 |
| H | 5.847899000  | 2.103738000  | -0.784870000 |
| H | -5.884930000 | 1.916583000  | -0.930088000 |
| H | 3.062568000  | 4.309407000  | -3.191698000 |
| H | -3.104823000 | 4.345404000  | -3.114679000 |
| H | 4.945115000  | 5.620579000  | -4.189338000 |
| H | -4.998719000 | 5.715627000  | -4.023105000 |
| H | 7.745638000  | 3.411179000  | -1.769406000 |
| H | -7.791526000 | 3.280940000  | -1.816673000 |
| H | -7.475814000 | -4.340268000 | -4.163280000 |
| H | 7.256620000  | -4.510957000 | -4.368124000 |
| H | -7.338997000 | 5.171515000  | -3.369407000 |
| H | 7.283310000  | 5.166504000  | -3.470919000 |
| H | -1.873721000 | -2.790494000 | 0.566039000  |
| H | -0.896687000 | 1.511325000  | 4.630542000  |
| H | -0.056470000 | 0.173074000  | 4.524519000  |
| H | 0.071287000  | 3.762206000  | 0.477839000  |
| H | 0.732496000  | 3.864410000  | 2.685378000  |
| H | 0.879985000  | 3.913619000  | -0.873125000 |
| H | 1.902263000  | -0.188995000 | 3.427581000  |
| H | -1.861839000 | 2.654973000  | 0.804919000  |
| H | -0.695797000 | -2.058586000 | 4.650149000  |
| H | 0.916071000  | -4.015316000 | 2.256274000  |
| H | 0.674212000  | -4.022080000 | -1.275099000 |

|    |              |              |              |
|----|--------------|--------------|--------------|
| H  | 0.065779000  | -3.890953000 | 0.925711000  |
| O  | -1.054194000 | -0.090274000 | 2.074397000  |
| O  | -3.543172000 | 1.266312000  | 2.134167000  |
| O  | -3.552079000 | 1.316602000  | -0.606325000 |
| O  | -3.584599000 | -1.516003000 | 2.051890000  |
| O  | -2.038764000 | -2.640296000 | 3.219167000  |
| O  | 0.028848000  | -3.789795000 | 1.918400000  |
| O  | 2.100202000  | -2.867093000 | 3.010147000  |
| O  | 2.069730000  | -2.623055000 | -1.805049000 |
| O  | 3.562738000  | -1.515853000 | 1.974667000  |
| O  | 3.558837000  | -1.388863000 | -0.691234000 |
| O  | 3.610205000  | 1.259648000  | 2.091048000  |
| O  | 3.529488000  | 1.374544000  | -0.577408000 |
| O  | 2.040072000  | 2.690897000  | -1.596006000 |
| O  | 2.096026000  | 2.456560000  | 3.228283000  |
| O  | 1.086541000  | 1.319814000  | 0.722688000  |
| O  | 1.363433000  | -0.122452000 | 2.627117000  |
| O  | 0.010186000  | -1.535863000 | 4.239861000  |
| O  | -0.011844000 | 1.161061000  | 4.412197000  |
| O  | 1.064794000  | -1.461643000 | 0.685351000  |
| O  | -1.343501000 | -1.986252000 | 0.652855000  |
| O  | -2.079702000 | -2.429442000 | -2.026823000 |
| O  | -0.017400000 | -3.600700000 | -0.743525000 |
| O  | -3.508696000 | -1.355163000 | -0.690548000 |
| O  | 0.017340000  | 3.460854000  | 2.170029000  |
| O  | 0.007609000  | 3.669406000  | -0.512161000 |
| O  | -1.325705000 | 1.853455000  | 0.729676000  |
| O  | -2.072184000 | 2.288892000  | 3.484381000  |
| O  | -2.090385000 | 2.474041000  | -1.834388000 |
| O  | 1.359096000  | -0.022058000 | -1.210439000 |
| O  | -1.055527000 | -0.043495000 | -0.727536000 |
| H  | 1.837659000  | -0.031465000 | -2.066338000 |
| O  | 0.050808000  | 1.612686000  | -2.842282000 |
| H  | -0.820002000 | 1.659015000  | -3.266384000 |
| Ti | 2.486876000  | -0.066002000 | 0.672709000  |
| Ti | -0.085043000 | -1.699621000 | 2.370476000  |
| Ti | 0.106589000  | 1.588123000  | 2.317171000  |
| Ti | -0.043870000 | 1.576228000  | -0.987478000 |
| Ti | -2.452287000 | -0.065585000 | 0.663196000  |
| Ti | 0.090028000  | -1.715713000 | -0.904946000 |
| C  | -0.024340000 | -2.854373000 | -4.904965000 |
| C  | 0.525738000  | -1.691918000 | -4.134420000 |
| C  | 1.543102000  | -0.780460000 | -4.759125000 |
| H  | 2.392543000  | -1.419744000 | -5.061839000 |
| H  | 0.812515000  | -3.375175000 | -5.404243000 |
| H  | 1.117000000  | -0.392530000 | -5.706478000 |

|   |              |              |              |
|---|--------------|--------------|--------------|
| H | 1.275107000  | 0.835023000  | -3.695399000 |
| H | -1.181026000 | -3.276730000 | -3.395916000 |
| H | -0.615568000 | -2.411620000 | -5.739523000 |
| O | 2.014944000  | 0.210034000  | -3.917064000 |
| O | 0.150195000  | -1.516105000 | -2.986555000 |
| O | -0.735800000 | -3.749011000 | -4.133572000 |
| C | -2.623518000 | -0.676157000 | -4.609530000 |
| C | -3.975588000 | -0.081754000 | -4.347541000 |
| C | -4.111431000 | 1.333026000  | -4.876677000 |
| H | -2.630652000 | -1.796324000 | -4.692631000 |
| H | -5.513967000 | 2.659998000  | -4.605815000 |
| H | -3.840743000 | 1.351560000  | -5.951132000 |
| H | -3.399348000 | 1.991539000  | -4.348035000 |
| H | -5.789994000 | -0.534302000 | -4.742777000 |
| H | -4.068240000 | -0.040943000 | -3.231683000 |
| O | -1.605677000 | -0.031598000 | -4.724991000 |
| O | -5.451781000 | 1.699674000  | -4.673280000 |
| O | -4.928887000 | -0.940712000 | -4.905827000 |

#### 4. functionalized Hf-NU-1000 case

##### 4.1 -NH<sub>2</sub>

##### Hf-NU-1000 (-NH<sub>2</sub>)

|   |              |              |              |
|---|--------------|--------------|--------------|
| C | -3.248200000 | -2.182800000 | -1.650100000 |
| C | -3.229700000 | -2.386600000 | 2.900000000  |
| C | -3.232300000 | 2.034300000  | 3.104000000  |
| C | 3.276900000  | 2.142000000  | 2.939200000  |
| C | 3.226900000  | 2.366300000  | -1.338700000 |
| C | 3.259300000  | -2.277900000 | -1.561500000 |
| C | -3.265300000 | 2.236100000  | -1.457300000 |
| C | 3.257200000  | -2.506600000 | 2.716400000  |
| H | 4.085552000  | 2.702322000  | 3.456423000  |
| H | 4.063154000  | -3.148474000 | 3.135327000  |
| H | -4.032628000 | 2.554401000  | 3.674720000  |
| H | -4.031616000 | -2.979607000 | 3.390692000  |
| C | 5.658853000  | -2.792746000 | -1.811985000 |
| C | -5.605863000 | -2.523568000 | -2.295249000 |
| C | 4.329524000  | -3.079471000 | -2.179089000 |
| C | -4.266170000 | -2.942148000 | -2.390027000 |
| C | 4.080518000  | -4.127165000 | -3.113725000 |
| C | -3.946897000 | -4.100803000 | -3.157117000 |
| C | 5.190851000  | -4.826885000 | -3.634739000 |
| C | -5.010539000 | -4.775150000 | -3.798350000 |
| C | 6.484778000  | -4.517338000 | -3.255085000 |
| C | -6.316369000 | -4.328347000 | -3.700005000 |
| C | 6.732882000  | -3.492099000 | -2.333631000 |



|   |              |              |              |
|---|--------------|--------------|--------------|
| C | -6.629936000 | -3.189940000 | -2.946167000 |
| C | 5.579557000  | 3.009092000  | -1.763314000 |
| C | -5.668059000 | 2.649972000  | -1.871279000 |
| C | 4.225399000  | 3.100780000  | -2.128184000 |
| C | -4.329814000 | 3.001444000  | -2.129786000 |
| C | 3.848042000  | 3.874060000  | -3.267544000 |
| C | -4.054676000 | 4.086867000  | -3.014855000 |
| C | 4.882516000  | 4.543485000  | -3.963260000 |
| C | -5.155952000 | 4.763205000  | -3.588153000 |
| C | 6.204744000  | 4.455339000  | -3.565179000 |
| C | -6.459231000 | 4.389410000  | -3.314984000 |
| C | 6.572027000  | 3.682658000  | -2.455469000 |
| C | -6.731030000 | 3.321006000  | -2.450366000 |
| H | 5.814610000  | -1.986560000 | -1.093547000 |
| H | -5.810126000 | -1.640225000 | -1.687205000 |
| H | 5.007758000  | -5.631065000 | -4.352541000 |
| H | -4.779987000 | -5.668090000 | -4.385855000 |
| H | 7.752872000  | -3.246447000 | -2.034534000 |
| H | -7.659821000 | -2.838068000 | -2.869581000 |
| H | 5.821460000  | 2.387391000  | -0.898626000 |
| H | -5.839822000 | 1.817607000  | -1.186799000 |
| H | 4.615349000  | 5.140657000  | -4.839666000 |
| H | -4.956173000 | 5.598021000  | -4.265539000 |
| H | 7.615957000  | 3.609801000  | -2.146613000 |
| H | -7.759069000 | 3.025816000  | -2.234785000 |
| H | -7.107092000 | -4.877525000 | -4.217618000 |
| H | 7.315885000  | -5.082477000 | -3.684452000 |
| H | -7.280114000 | 4.939722000  | -3.782036000 |
| H | 6.967639000  | 4.993524000  | -4.133813000 |
| H | -1.939211000 | -2.925987000 | 0.600207000  |
| H | -0.875504000 | 1.379058000  | 5.101250000  |
| H | -0.015447000 | 0.076582000  | 4.808583000  |
| H | 0.003524000  | 4.049320000  | 0.613994000  |
| H | 0.664630000  | 4.290389000  | 2.675558000  |
| H | 0.846869000  | 4.353848000  | -0.694124000 |
| H | 1.959743000  | -0.191781000 | 3.591030000  |
| H | -1.943072000 | 2.800258000  | 0.850329000  |
| H | -0.608632000 | -2.013900000 | 5.120321000  |
| H | 0.904233000  | -4.438227000 | 2.124164000  |
| H | 0.784075000  | -4.368446000 | -1.149890000 |
| H | 0.023896000  | -4.139724000 | 0.842228000  |
| O | -1.062567000 | -0.104073000 | 2.186028000  |
| O | -3.615968000 | 1.286183000  | 2.167756000  |
| O | -3.604838000 | 1.341703000  | -0.619214000 |
| O | -3.603895000 | -1.509210000 | 2.082902000  |
| O | -2.046823000 | -2.661798000 | 3.231763000  |

|    |              |              |              |
|----|--------------|--------------|--------------|
| O  | 0.048865000  | -4.076747000 | 1.852433000  |
| O  | 2.073882000  | -2.836442000 | 2.985128000  |
| O  | 2.034807000  | -2.494681000 | -1.908574000 |
| O  | 3.631001000  | -1.525352000 | 2.025070000  |
| O  | 3.574664000  | -1.406375000 | -0.703631000 |
| O  | 3.652630000  | 1.273053000  | 2.111259000  |
| O  | 3.606109000  | 1.384203000  | -0.615469000 |
| O  | 2.016848000  | 2.720261000  | -1.431596000 |
| O  | 2.098313000  | 2.441099000  | 3.247585000  |
| O  | 1.065411000  | 1.377362000  | 0.755809000  |
| O  | 1.409559000  | -0.131816000 | 2.800142000  |
| O  | 0.031831000  | -1.530130000 | 4.587071000  |
| O  | -0.029095000 | 1.090317000  | 4.732450000  |
| O  | 1.076834000  | -1.543912000 | 0.695652000  |
| O  | -1.385385000 | -2.139988000 | 0.683537000  |
| O  | -2.007866000 | -2.349408000 | -1.950843000 |
| O  | 0.004901000  | -3.918773000 | -0.801816000 |
| O  | -3.617546000 | -1.399689000 | -0.721288000 |
| O  | -0.003858000 | 3.779982000  | 2.205367000  |
| O  | -0.007365000 | 4.003022000  | -0.402150000 |
| O  | -1.389670000 | 2.011488000  | 0.795274000  |
| O  | -2.048604000 | 2.244776000  | 3.467061000  |
| O  | -2.055114000 | 2.501045000  | -1.737118000 |
| O  | 1.316467000  | 0.000211000  | -1.443096000 |
| O  | -1.071019000 | -0.018055000 | -0.767531000 |
| H  | 1.912778000  | 0.055216000  | -2.199618000 |
| O  | 0.170054000  | 2.018034000  | -3.101028000 |
| H  | -0.634517000 | 2.058133000  | -3.628838000 |
| Hf | 2.547801000  | -0.039081000 | 0.705641000  |
| Hf | -0.023175000 | -1.863132000 | 2.521975000  |
| Hf | 0.031444000  | 1.706472000  | 2.520026000  |
| Hf | -0.030553000 | 1.793648000  | -1.063916000 |
| Hf | -2.541364000 | -0.053920000 | 0.703661000  |
| Hf | 0.024123000  | -1.810674000 | -1.007745000 |
| N  | -2.675186000 | -4.580657000 | -3.297633000 |
| H  | -1.954818000 | -4.204487000 | -2.690335000 |
| H  | -2.581415000 | -5.545794000 | -3.580737000 |
| N  | 2.820432000  | -4.508164000 | -3.490080000 |
| H  | 2.745702000  | -5.073641000 | -4.324309000 |
| H  | 2.076621000  | -3.844012000 | -3.312184000 |
| N  | 2.562844000  | 3.998705000  | -3.713413000 |
| H  | 1.837216000  | 3.353100000  | -3.396807000 |
| H  | 2.458394000  | 4.338217000  | -4.659764000 |
| N  | -2.791296000 | 4.480538000  | -3.350051000 |
| H  | -2.687450000 | 5.387174000  | -3.782451000 |
| H  | -2.020525000 | 4.129164000  | -2.793291000 |

Hf-NU-1000 (-NH<sub>2</sub>) Ads

|   |              |              |              |
|---|--------------|--------------|--------------|
| C | -3.248200000 | -2.182800000 | -1.650100000 |
| C | -3.229700000 | -2.386600000 | 2.900000000  |
| C | -3.232300000 | 2.034300000  | 3.104000000  |
| C | 3.276900000  | 2.142000000  | 2.939200000  |
| C | 3.226900000  | 2.366300000  | -1.338700000 |
| C | 3.259300000  | -2.277900000 | -1.561500000 |
| C | -3.265300000 | 2.236100000  | -1.457300000 |
| C | 3.257200000  | -2.506600000 | 2.716400000  |
| H | 4.086269000  | 2.727511000  | 3.427920000  |
| H | 4.061394000  | -3.127496000 | 3.169062000  |
| H | -4.034177000 | 2.574090000  | 3.654332000  |
| H | -4.031683000 | -2.953262000 | 3.421508000  |
| C | 5.658498000  | -2.701317000 | -1.954654000 |
| C | -5.512152000 | -2.578761000 | -2.600661000 |
| C | 4.321993000  | -3.034206000 | -2.247315000 |
| C | -4.196603000 | -3.024089000 | -2.411022000 |
| C | 4.056762000  | -4.082447000 | -3.178774000 |
| C | -3.781694000 | -4.263891000 | -2.966289000 |
| C | 5.164814000  | -4.733774000 | -3.768407000 |
| C | -4.716736000 | -4.986035000 | -3.727754000 |
| C | 6.465629000  | -4.378688000 | -3.460641000 |
| C | -6.005570000 | -4.511758000 | -3.929206000 |
| C | 6.727882000  | -3.352032000 | -2.544577000 |
| C | -6.418155000 | -3.302492000 | -3.362750000 |
| C | 5.595174000  | 2.960675000  | -1.731649000 |
| C | -5.635205000 | 2.400174000  | -2.130279000 |
| C | 4.248918000  | 3.091700000  | -2.114619000 |
| C | -4.325689000 | 2.906804000  | -2.226747000 |
| C | 3.920018000  | 3.878496000  | -3.257018000 |
| C | -4.077012000 | 4.038554000  | -3.058890000 |
| C | 4.981452000  | 4.503208000  | -3.949507000 |
| C | -5.174227000 | 4.599009000  | -3.752137000 |
| C | 6.295721000  | 4.369457000  | -3.536889000 |
| C | -6.447411000 | 4.070649000  | -3.642241000 |
| C | 6.618751000  | 3.594852000  | -2.415858000 |
| C | -6.693295000 | 2.957495000  | -2.827303000 |
| H | 5.822868000  | -1.896324000 | -1.236799000 |
| H | -5.793991000 | -1.630804000 | -2.136388000 |
| H | 4.971938000  | -5.539532000 | -4.482320000 |
| H | -4.411245000 | -5.939224000 | -4.167597000 |
| H | 7.753164000  | -3.069076000 | -2.301698000 |
| H | -7.434192000 | -2.934864000 | -3.515061000 |
| H | 5.806010000  | 2.334684000  | -0.862429000 |
| H | -5.787476000 | 1.538185000  | -1.478032000 |

|   |              |              |              |
|---|--------------|--------------|--------------|
| H | 4.743317000  | 5.105736000  | -4.830500000 |
| H | -4.994787000 | 5.467519000  | -4.391633000 |
| H | 7.655174000  | 3.487138000  | -2.092180000 |
| H | -7.698375000 | 2.541812000  | -2.739617000 |
| H | -6.701215000 | -5.100102000 | -4.532337000 |
| H | 7.291022000  | -4.909143000 | -3.942515000 |
| H | -7.265768000 | 4.533399000  | -4.199978000 |
| H | 7.084572000  | 4.874404000  | -4.100433000 |
| H | -1.951379000 | -2.908324000 | 0.583181000  |
| H | -0.882907000 | 1.289462000  | 5.136985000  |
| H | -0.017304000 | -0.004961000 | 4.798464000  |
| H | 0.021057000  | 4.046210000  | 0.693306000  |
| H | 0.664467000  | 4.269686000  | 2.737250000  |
| H | 0.922932000  | 4.337018000  | -0.579302000 |
| H | 1.961366000  | -0.233862000 | 3.573031000  |
| H | -1.943669000 | 2.803099000  | 0.869230000  |
| H | -0.602109000 | -2.075149000 | 5.057712000  |
| H | 0.900276000  | -4.440939000 | 2.063581000  |
| H | 0.651053000  | -4.388876000 | -1.230867000 |
| H | 0.009961000  | -4.130076000 | 0.782858000  |
| O | -1.066647000 | -0.108231000 | 2.185535000  |
| O | -3.612130000 | 1.287591000  | 2.165220000  |
| O | -3.599606000 | 1.342412000  | -0.619152000 |
| O | -3.610262000 | -1.512570000 | 2.078192000  |
| O | -2.045797000 | -2.683977000 | 3.196648000  |
| O | 0.039502000  | -4.085557000 | 1.801416000  |
| O | 2.072237000  | -2.858351000 | 2.946738000  |
| O | 2.038831000  | -2.515359000 | -1.871594000 |
| O | 3.632822000  | -1.525652000 | 2.026622000  |
| O | 3.595185000  | -1.415132000 | -0.698236000 |
| O | 3.644016000  | 1.267883000  | 2.117943000  |
| O | 3.598056000  | 1.434982000  | -0.564445000 |
| O | 2.005049000  | 2.698090000  | -1.499354000 |
| O | 2.099166000  | 2.424196000  | 3.281020000  |
| O | 1.068971000  | 1.414928000  | 0.803266000  |
| O | 1.405963000  | -0.153528000 | 2.787745000  |
| O | 0.038633000  | -1.575132000 | 4.540267000  |
| O | -0.036431000 | 1.017568000  | 4.756603000  |
| O | 1.052546000  | -1.536816000 | 0.646713000  |
| O | -1.400909000 | -2.118271000 | 0.633653000  |
| O | -2.024126000 | -2.333103000 | -1.946227000 |
| O | -0.080800000 | -3.924364000 | -0.806150000 |
| O | -3.668202000 | -1.386028000 | -0.761315000 |
| O | -0.012231000 | 3.772458000  | 2.264205000  |
| O | 0.046957000  | 4.009525000  | -0.328959000 |
| O | -1.386330000 | 2.016329000  | 0.833997000  |

|    |              |              |              |
|----|--------------|--------------|--------------|
| O  | -2.053319000 | 2.222886000  | 3.494182000  |
| O  | -2.049432000 | 2.564854000  | -1.669508000 |
| O  | 1.391152000  | 0.054871000  | -1.327880000 |
| O  | -1.069722000 | 0.003629000  | -0.768885000 |
| H  | 1.922282000  | 0.081456000  | -2.147622000 |
| O  | 0.017207000  | 1.717935000  | -3.114122000 |
| H  | -0.837308000 | 2.023864000  | -3.456886000 |
| Hf | 2.530623000  | -0.064226000 | 0.695317000  |
| Hf | -0.016353000 | -1.882265000 | 2.456084000  |
| Hf | 0.029985000  | 1.689710000  | 2.571423000  |
| Hf | -0.014882000 | 1.791743000  | -0.964174000 |
| Hf | -2.534979000 | -0.062369000 | 0.706945000  |
| Hf | 0.019244000  | -1.803710000 | -1.147801000 |
| C  | -1.710158000 | -2.329427000 | -5.182507000 |
| C  | -0.239137000 | -2.608557000 | -4.824303000 |
| C  | 0.313657000  | -1.211705000 | -4.570082000 |
| C  | -1.716546000 | -0.858197000 | -5.621446000 |
| C  | 1.812914000  | -0.978983000 | -4.713696000 |
| C  | -2.596816000 | 0.067009000  | -4.795981000 |
| H  | 2.351754000  | -1.835708000 | -4.285565000 |
| H  | 0.270612000  | -3.029485000 | -5.717234000 |
| H  | -2.307643000 | -2.445160000 | -4.266257000 |
| H  | -1.389157000 | 1.451858000  | -5.327079000 |
| H  | 2.056104000  | -0.933590000 | -5.789927000 |
| H  | 1.601158000  | 0.891373000  | -4.138576000 |
| H  | -2.439316000 | -0.134799000 | -3.717109000 |
| H  | -3.658044000 | -0.141301000 | -5.007176000 |
| H  | -0.897794000 | -3.887142000 | -3.502204000 |
| H  | -0.089481000 | 0.155127000  | -3.202907000 |
| H  | -1.787473000 | -3.138237000 | -6.939908000 |
| H  | -1.987054000 | -0.767018000 | -6.687079000 |
| O  | -2.261510000 | -3.231004000 | -6.104590000 |
| O  | 2.247199000  | 0.168598000  | -4.024123000 |
| O  | -2.332256000 | 1.412368000  | -5.111589000 |
| O  | -0.117907000 | -0.861854000 | -3.273769000 |
| O  | -0.048607000 | -3.436104000 | -3.709901000 |
| O  | -0.347623000 | -0.408495000 | -5.519732000 |
| N  | -2.496160000 | -4.784828000 | -2.805229000 |
| H  | -1.985224000 | -4.501328000 | -1.966293000 |
| H  | -2.461553000 | -5.789579000 | -2.942406000 |
| N  | 2.800725000  | -4.506291000 | -3.501740000 |
| H  | 2.708677000  | -5.148381000 | -4.275503000 |
| H  | 1.988453000  | -3.951378000 | -3.253124000 |
| N  | 2.639790000  | 4.061983000  | -3.705740000 |
| H  | 1.905788000  | 3.468691000  | -3.332542000 |
| H  | 2.533702000  | 4.380621000  | -4.658523000 |

|   |              |             |              |
|---|--------------|-------------|--------------|
| N | -2.841932000 | 4.591046000 | -3.219564000 |
| H | -2.783029000 | 5.509108000 | -3.634192000 |
| H | -2.094052000 | 4.283321000 | -2.610457000 |

Hf-NU-1000 (-NH<sub>2</sub>) TS1

|   |              |              |              |
|---|--------------|--------------|--------------|
| C | -3.248200000 | -2.182800000 | -1.650100000 |
| C | -3.229700000 | -2.386600000 | 2.900000000  |
| C | -3.232300000 | 2.034300000  | 3.104000000  |
| C | 3.276900000  | 2.142000000  | 2.939200000  |
| C | 3.226900000  | 2.366300000  | -1.338700000 |
| C | 3.259300000  | -2.277900000 | -1.561500000 |
| C | -3.265300000 | 2.236100000  | -1.457300000 |
| C | 3.257200000  | -2.506600000 | 2.716400000  |
| H | 4.086205000  | 2.728766000  | 3.426732000  |
| H | 4.060818000  | -3.125031000 | 3.173419000  |
| H | -4.033283000 | 2.576168000  | 3.653649000  |
| H | -4.030874000 | -2.953050000 | 3.423139000  |
| C | 5.658538000  | -2.652766000 | -2.005954000 |
| C | -5.513566000 | -2.595595000 | -2.592502000 |
| C | 4.323597000  | -3.018460000 | -2.263465000 |
| C | -4.199394000 | -3.039249000 | -2.390961000 |
| C | 4.060534000  | -4.082686000 | -3.177130000 |
| C | -3.787320000 | -4.293985000 | -2.913824000 |
| C | 5.168970000  | -4.715734000 | -3.785467000 |
| C | -4.723452000 | -5.032181000 | -3.658657000 |
| C | 6.468374000  | -4.328059000 | -3.512740000 |
| C | -6.010604000 | -4.559295000 | -3.873778000 |
| C | 6.728509000  | -3.285410000 | -2.614518000 |
| C | -6.420718000 | -3.335422000 | -3.337773000 |
| C | 5.606205000  | 2.962466000  | -1.640044000 |
| C | -5.635767000 | 2.401641000  | -2.125095000 |
| C | 4.270223000  | 3.135084000  | -2.044771000 |
| C | -4.324720000 | 2.902769000  | -2.231544000 |
| C | 3.981187000  | 4.010970000  | -3.131181000 |
| C | -4.075886000 | 4.025058000  | -3.076149000 |
| C | 5.064616000  | 4.670424000  | -3.752549000 |
| C | -5.173793000 | 4.582942000  | -3.770322000 |
| C | 6.367341000  | 4.487871000  | -3.322480000 |
| C | -6.448444000 | 4.060491000  | -3.649703000 |
| C | 6.653037000  | 3.629713000  | -2.253554000 |
| C | -6.694678000 | 2.956119000  | -2.823019000 |
| H | 5.821315000  | -1.836396000 | -1.300718000 |
| H | -5.793779000 | -1.635863000 | -2.151971000 |
| H | 4.977743000  | -5.533982000 | -4.485502000 |
| H | -4.420493000 | -5.997362000 | -4.073432000 |
| H | 7.752492000  | -2.976425000 | -2.399269000 |

|   |              |              |              |
|---|--------------|--------------|--------------|
| H | -7.435585000 | -2.968958000 | -3.500376000 |
| H | 5.789358000  | 2.274811000  | -0.812437000 |
| H | -5.788615000 | 1.546584000  | -1.463998000 |
| H | 4.853319000  | 5.340793000  | -4.590251000 |
| H | -4.993785000 | 5.444573000  | -4.418905000 |
| H | 7.679859000  | 3.484213000  | -1.914476000 |
| H | -7.700775000 | 2.544791000  | -2.727125000 |
| H | -6.707049000 | -5.160445000 | -4.463218000 |
| H | 7.294042000  | -4.845250000 | -4.008387000 |
| H | -7.267582000 | 4.520806000  | -4.208290000 |
| H | 7.175538000  | 5.021104000  | -3.829629000 |
| H | -1.954083000 | -2.908990000 | 0.583903000  |
| H | -0.880209000 | 1.277301000  | 5.144788000  |
| H | -0.016982000 | -0.017913000 | 4.793824000  |
| H | 0.030153000  | 4.036257000  | 0.697665000  |
| H | 0.667533000  | 4.265449000  | 2.735801000  |
| H | 0.940543000  | 4.328955000  | -0.569058000 |
| H | 1.959532000  | -0.237865000 | 3.569609000  |
| H | -1.940487000 | 2.804883000  | 0.867525000  |
| H | -0.600032000 | -2.079790000 | 5.047185000  |
| H | 0.894483000  | -4.444423000 | 2.061401000  |
| H | 0.632597000  | -4.394700000 | -1.224698000 |
| H | 0.006425000  | -4.126032000 | 0.776924000  |
| O | -1.067996000 | -0.107263000 | 2.185793000  |
| O | -3.612914000 | 1.287259000  | 2.166371000  |
| O | -3.599425000 | 1.348770000  | -0.614294000 |
| O | -3.613373000 | -1.511983000 | 2.079593000  |
| O | -2.045860000 | -2.684109000 | 3.193277000  |
| O | 0.035062000  | -4.086131000 | 1.799337000  |
| O | 2.072360000  | -2.859416000 | 2.942243000  |
| O | 2.041312000  | -2.530356000 | -1.856658000 |
| O | 3.634555000  | -1.526373000 | 2.025995000  |
| O | 3.598240000  | -1.412755000 | -0.700232000 |
| O | 3.642181000  | 1.269038000  | 2.116442000  |
| O | 3.585429000  | 1.436645000  | -0.561863000 |
| O | 2.000450000  | 2.671597000  | -1.552058000 |
| O | 2.098824000  | 2.422714000  | 3.283968000  |
| O | 1.069354000  | 1.419288000  | 0.803997000  |
| O | 1.405375000  | -0.154818000 | 2.783713000  |
| O | 0.040804000  | -1.577894000 | 4.531679000  |
| O | -0.036283000 | 1.007199000  | 4.757866000  |
| O | 1.047714000  | -1.535889000 | 0.640203000  |
| O | -1.407789000 | -2.115778000 | 0.628914000  |
| O | -2.027701000 | -2.332383000 | -1.953342000 |
| O | -0.090125000 | -3.923415000 | -0.792003000 |
| O | -3.667028000 | -1.377379000 | -0.767891000 |

|    |              |              |              |
|----|--------------|--------------|--------------|
| O  | -0.010535000 | 3.770129000  | 2.262560000  |
| O  | 0.064377000  | 3.997352000  | -0.326363000 |
| O  | -1.385058000 | 2.016543000  | 0.837490000  |
| O  | -2.053047000 | 2.222149000  | 3.494979000  |
| O  | -2.045135000 | 2.560980000  | -1.671716000 |
| O  | 1.397733000  | 0.050905000  | -1.316211000 |
| O  | -1.069923000 | 0.002125000  | -0.759955000 |
| H  | 1.915263000  | 0.062613000  | -2.145223000 |
| O  | -0.042002000 | 1.541833000  | -3.130508000 |
| H  | -0.900733000 | 1.821628000  | -3.494775000 |
| Hf | 2.527052000  | -0.076916000 | 0.694565000  |
| Hf | -0.016377000 | -1.885733000 | 2.443487000  |
| Hf | 0.028329000  | 1.686045000  | 2.578205000  |
| Hf | -0.013607000 | 1.774138000  | -0.946427000 |
| Hf | -2.538092000 | -0.067406000 | 0.710044000  |
| Hf | 0.014637000  | -1.804216000 | -1.181193000 |
| C  | -1.673983000 | -2.396455000 | -5.157667000 |
| C  | -0.212443000 | -2.672864000 | -4.765695000 |
| C  | 0.351208000  | -1.276408000 | -4.516915000 |
| C  | -1.666953000 | -0.926242000 | -5.601527000 |
| C  | 1.856516000  | -1.085249000 | -4.692305000 |
| C  | -2.542652000 | 0.000501000  | -4.771399000 |
| H  | 2.382542000  | -1.946325000 | -4.259059000 |
| H  | 0.309052000  | -3.119149000 | -5.639714000 |
| H  | -2.297493000 | -2.510232000 | -4.259392000 |
| H  | -1.346163000 | 1.354566000  | -5.411090000 |
| H  | 2.092490000  | -1.056533000 | -5.770516000 |
| H  | 1.760435000  | 0.812923000  | -4.230108000 |
| H  | -2.395043000 | -0.211844000 | -3.694488000 |
| H  | -3.605386000 | -0.189878000 | -4.994673000 |
| H  | -0.896407000 | -3.932485000 | -3.435982000 |
| H  | -0.059115000 | 0.304211000  | -3.214695000 |
| H  | -1.690917000 | -3.222610000 | -6.908693000 |
| H  | -1.948894000 | -0.839583000 | -6.665044000 |
| O  | -2.201251000 | -3.300517000 | -6.093514000 |
| O  | 2.333293000  | 0.058298000  | -4.018203000 |
| O  | -2.248784000 | 1.351520000  | -5.060211000 |
| O  | -0.059477000 | -0.875851000 | -3.256565000 |
| O  | -0.045578000 | -3.480648000 | -3.630842000 |
| O  | -0.298319000 | -0.489807000 | -5.514420000 |
| N  | -2.504877000 | -4.814797000 | -2.735639000 |
| H  | -1.989862000 | -4.511562000 | -1.905895000 |
| H  | -2.471078000 | -5.822309000 | -2.849696000 |
| N  | 2.807049000  | -4.540217000 | -3.464595000 |
| H  | 2.713862000  | -5.189151000 | -4.232697000 |
| H  | 1.989130000  | -3.993801000 | -3.214582000 |



|   |              |             |              |
|---|--------------|-------------|--------------|
| N | 2.711778000  | 4.252178000 | -3.585869000 |
| H | 1.974506000  | 3.633493000 | -3.268197000 |
| H | 2.624917000  | 4.641946000 | -4.513844000 |
| N | -2.839292000 | 4.570837000 | -3.246403000 |
| H | -2.777487000 | 5.485896000 | -3.667067000 |
| H | -2.091346000 | 4.260543000 | -2.638670000 |

Hf-NU-1000 (-NH<sub>2</sub>) Int1

|   |              |              |              |
|---|--------------|--------------|--------------|
| C | -3.248200000 | -2.182800000 | -1.650100000 |
| C | -3.229700000 | -2.386600000 | 2.900000000  |
| C | -3.232300000 | 2.034300000  | 3.104000000  |
| C | 3.276900000  | 2.142000000  | 2.939200000  |
| C | 3.226900000  | 2.366300000  | -1.338700000 |
| C | 3.259300000  | -2.277900000 | -1.561500000 |
| C | -3.265300000 | 2.236100000  | -1.457300000 |
| C | 3.257200000  | -2.506600000 | 2.716400000  |
| H | 4.085805000  | 2.732638000  | 3.422927000  |
| H | 4.059107000  | -3.120953000 | 3.181539000  |
| H | -4.032265000 | 2.581777000  | 3.649713000  |
| H | -4.029988000 | -2.950594000 | 3.427105000  |
| C | 5.658684000  | -2.646266000 | -2.017526000 |
| C | -5.534961000 | -2.591674000 | -2.537957000 |
| C | 4.324491000  | -3.027520000 | -2.253194000 |
| C | -4.212894000 | -3.031667000 | -2.380352000 |
| C | 4.059619000  | -4.120187000 | -3.132253000 |
| C | -3.812037000 | -4.280508000 | -2.928736000 |
| C | 5.167473000  | -4.766018000 | -3.728011000 |
| C | -4.771235000 | -5.014404000 | -3.651142000 |
| C | 6.466917000  | -4.363211000 | -3.477542000 |
| C | -6.065402000 | -4.544812000 | -3.820618000 |
| C | 6.727897000  | -3.291367000 | -2.614834000 |
| C | -6.462973000 | -3.326584000 | -3.261069000 |
| C | 5.609615000  | 2.937007000  | -1.655870000 |
| C | -5.627732000 | 2.375166000  | -2.160249000 |
| C | 4.273863000  | 3.118656000  | -2.058158000 |
| C | -4.321143000 | 2.886774000  | -2.255567000 |
| C | 3.991483000  | 3.985247000  | -3.153516000 |
| C | -4.072276000 | 4.001220000  | -3.108363000 |
| C | 5.079487000  | 4.625790000  | -3.786285000 |
| C | -5.166702000 | 4.549375000  | -3.813461000 |
| C | 6.381677000  | 4.434371000  | -3.358487000 |
| C | -6.440660000 | 4.019529000  | -3.701206000 |
| C | 6.661412000  | 3.585771000  | -2.280504000 |
| C | -6.684635000 | 2.916979000  | -2.873376000 |
| H | 5.821996000  | -1.808210000 | -1.338276000 |
| H | -5.804278000 | -1.637919000 | -2.077908000 |

|   |              |              |              |
|---|--------------|--------------|--------------|
| H | 4.975471000  | -5.606470000 | -4.400950000 |
| H | -4.477952000 | -5.974197000 | -4.084901000 |
| H | 7.751744000  | -2.969940000 | -2.417498000 |
| H | -7.483870000 | -2.962549000 | -3.387840000 |
| H | 5.788787000  | 2.256805000  | -0.821356000 |
| H | -5.780629000 | 1.523169000  | -1.495155000 |
| H | 4.872242000  | 5.288675000  | -4.630929000 |
| H | -4.987055000 | 5.410430000  | -4.463391000 |
| H | 7.687665000  | 3.432815000  | -1.943055000 |
| H | -7.688119000 | 2.497675000  | -2.784605000 |
| H | -6.777993000 | -5.143360000 | -4.393357000 |
| H | 7.291731000  | -4.891193000 | -3.963247000 |
| H | -7.258634000 | 4.472979000  | -4.267071000 |
| H | 7.193876000  | 4.952778000  | -3.874505000 |
| H | -1.957177000 | -2.899214000 | 0.573684000  |
| H | -0.877022000 | 1.257743000  | 5.160786000  |
| H | -0.018224000 | -0.038149000 | 4.791765000  |
| H | 0.033820000  | 4.037800000  | 0.722033000  |
| H | 0.672683000  | 4.256055000  | 2.751280000  |
| H | 0.949929000  | 4.328696000  | -0.542996000 |
| H | 1.957508000  | -0.241842000 | 3.572762000  |
| H | -1.936606000 | 2.812546000  | 0.878316000  |
| H | -0.603391000 | -2.091866000 | 5.031106000  |
| H | 0.904315000  | -4.446568000 | 1.992455000  |
| H | 0.646914000  | -4.371639000 | -1.277716000 |
| H | 0.004765000  | -4.112916000 | 0.722068000  |
| O | -1.067045000 | -0.107690000 | 2.183825000  |
| O | -3.613880000 | 1.289060000  | 2.165693000  |
| O | -3.606297000 | 1.357715000  | -0.610537000 |
| O | -3.615233000 | -1.507347000 | 2.085189000  |
| O | -2.045133000 | -2.691234000 | 3.183013000  |
| O | 0.044047000  | -4.081728000 | 1.742745000  |
| O | 2.071636000  | -2.863381000 | 2.932106000  |
| O | 2.045705000  | -2.542807000 | -1.839175000 |
| O | 3.637233000  | -1.526606000 | 2.026447000  |
| O | 3.600289000  | -1.394376000 | -0.714056000 |
| O | 3.641957000  | 1.268750000  | 2.117490000  |
| O | 3.581695000  | 1.447778000  | -0.551038000 |
| O | 1.998509000  | 2.677740000  | -1.553636000 |
| O | 2.098958000  | 2.419821000  | 3.288480000  |
| O | 1.066541000  | 1.421651000  | 0.809532000  |
| O | 1.405927000  | -0.156057000 | 2.785364000  |
| O | 0.039489000  | -1.587322000 | 4.520723000  |
| O | -0.036980000 | 0.989647000  | 4.764556000  |
| O | 1.053777000  | -1.522774000 | 0.637612000  |
| O | -1.410022000 | -2.107029000 | 0.625008000  |

|    |              |              |              |
|----|--------------|--------------|--------------|
| O  | -2.032024000 | -2.342725000 | -1.952639000 |
| O  | -0.091633000 | -3.905685000 | -0.866425000 |
| O  | -3.659964000 | -1.364952000 | -0.770881000 |
| O  | -0.009702000 | 3.766619000  | 2.277937000  |
| O  | 0.070727000  | 4.002223000  | -0.304124000 |
| O  | -1.384372000 | 2.021944000  | 0.850227000  |
| O  | -2.053937000 | 2.215419000  | 3.501282000  |
| O  | -2.044656000 | 2.571994000  | -1.655676000 |
| O  | 1.393113000  | 0.073809000  | -1.328392000 |
| O  | -1.079566000 | 0.022614000  | -0.764659000 |
| H  | 1.894257000  | 0.055749000  | -2.167775000 |
| O  | -0.040008000 | 1.545007000  | -3.171158000 |
| H  | -0.868740000 | 1.748826000  | -3.665700000 |
| Hf | 2.532738000  | -0.081961000 | 0.691844000  |
| Hf | -0.013292000 | -1.889755000 | 2.428024000  |
| Hf | 0.026901000  | 1.679032000  | 2.591909000  |
| Hf | -0.013493000 | 1.779879000  | -0.919140000 |
| Hf | -2.541876000 | -0.069925000 | 0.711420000  |
| Hf | 0.013940000  | -1.783124000 | -1.202022000 |
| C  | -1.714122000 | -2.322290000 | -5.209075000 |
| C  | -0.250043000 | -2.704258000 | -4.964658000 |
| C  | 0.362529000  | -1.376340000 | -4.506593000 |
| C  | -1.654508000 | -0.807320000 | -5.488265000 |
| C  | 1.863933000  | -1.214753000 | -4.719163000 |
| C  | -2.538768000 | -0.016158000 | -4.532381000 |
| H  | 2.383268000  | -2.075317000 | -4.277770000 |
| H  | 0.206785000  | -2.982230000 | -5.938974000 |
| H  | -2.270486000 | -2.499745000 | -4.276061000 |
| H  | -2.582509000 | 1.703949000  | -5.487441000 |
| H  | 2.091804000  | -1.201140000 | -5.799408000 |
| H  | 1.911831000  | 0.708801000  | -4.434431000 |
| H  | -2.296854000 | -0.289256000 | -3.493945000 |
| H  | -3.597629000 | -0.288423000 | -4.703516000 |
| H  | -0.916164000 | -4.030001000 | -3.698221000 |
| H  | 0.025459000  | 0.542360000  | -3.260813000 |
| H  | -1.878741000 | -3.015903000 | -7.006804000 |
| H  | -1.966182000 | -0.605309000 | -6.530527000 |
| O  | -2.375156000 | -3.088401000 | -6.182668000 |
| O  | 2.365607000  | -0.063236000 | -4.067835000 |
| O  | -2.345878000 | 1.384060000  | -4.609269000 |
| O  | 0.009437000  | -1.100446000 | -3.223322000 |
| O  | -0.047799000 | -3.737500000 | -4.042212000 |
| O  | -0.282197000 | -0.433160000 | -5.388912000 |
| N  | -2.529154000 | -4.800328000 | -2.797446000 |
| H  | -1.958985000 | -4.469949000 | -2.015571000 |
| H  | -2.490534000 | -5.807396000 | -2.908866000 |

|   |              |              |              |
|---|--------------|--------------|--------------|
| N | 2.805938000  | -4.598291000 | -3.392708000 |
| H | 2.714071000  | -5.240189000 | -4.167888000 |
| H | 1.995210000  | -4.016927000 | -3.207213000 |
| N | 2.723174000  | 4.234569000  | -3.607046000 |
| H | 1.981310000  | 3.629824000  | -3.274891000 |
| H | 2.635798000  | 4.612574000  | -4.539741000 |
| N | -2.828569000 | 4.542036000  | -3.290584000 |
| H | -2.789863000 | 5.491034000  | -3.635431000 |
| H | -2.106279000 | 4.252862000  | -2.640228000 |

Hf-NU-1000 (-NH<sub>2</sub>) TS2

|   |              |              |              |
|---|--------------|--------------|--------------|
| C | -3.248200000 | -2.182800000 | -1.650100000 |
| C | -3.229700000 | -2.386600000 | 2.900000000  |
| C | -3.232300000 | 2.034300000  | 3.104000000  |
| C | 3.276900000  | 2.142000000  | 2.939200000  |
| C | 3.226900000  | 2.366300000  | -1.338700000 |
| C | 3.259300000  | -2.277900000 | -1.561500000 |
| C | -3.265300000 | 2.236100000  | -1.457300000 |
| C | 3.257200000  | -2.506600000 | 2.716400000  |
| H | 4.088477000  | 2.690309000  | 3.465635000  |
| H | 4.064236000  | -3.144179000 | 3.140635000  |
| H | -4.032236000 | 2.549088000  | 3.680322000  |
| H | -4.030385000 | -2.984621000 | 3.387824000  |
| C | 5.617225000  | -2.380562000 | -2.315574000 |
| C | -5.527603000 | -2.258740000 | -2.626045000 |
| C | 4.300837000  | -2.863450000 | -2.437279000 |
| C | -4.238173000 | -2.809799000 | -2.553522000 |
| C | 4.020245000  | -3.874071000 | -3.406651000 |
| C | -3.912172000 | -3.937533000 | -3.355520000 |
| C | 5.089294000  | -4.328786000 | -4.211926000 |
| C | -4.910539000 | -4.455181000 | -4.200444000 |
| C | 6.371275000  | -3.827282000 | -4.069634000 |
| C | -6.171207000 | -3.882613000 | -4.266563000 |
| C | 6.650874000  | -2.842804000 | -3.113723000 |
| C | -6.492011000 | -2.772534000 | -3.478680000 |
| C | 5.622871000  | 2.916846000  | -1.618814000 |
| C | -5.650099000 | 2.620963000  | -1.961389000 |
| C | 4.282482000  | 3.237474000  | -1.902337000 |
| C | -4.315846000 | 3.047141000  | -2.090457000 |
| C | 4.001001000  | 4.381807000  | -2.704165000 |
| C | -4.033244000 | 4.244640000  | -2.811125000 |
| C | 5.091984000  | 5.138754000  | -3.183532000 |
| C | -5.124063000 | 4.950387000  | -3.366130000 |
| C | 6.399696000  | 4.793756000  | -2.888587000 |
| C | -6.424164000 | 4.497458000  | -3.231892000 |
| C | 6.679632000  | 3.672928000  | -2.098072000 |

|   |              |              |              |
|---|--------------|--------------|--------------|
| C | -6.703153000 | 3.319819000  | -2.526090000 |
| H | 5.795670000  | -1.615035000 | -1.557979000 |
| H | -5.739087000 | -1.398675000 | -1.986886000 |
| H | 4.883708000  | -5.101869000 | -4.957472000 |
| H | -4.669274000 | -5.319655000 | -4.824767000 |
| H | 7.661745000  | -2.448803000 | -2.997720000 |
| H | -7.484118000 | -2.321095000 | -3.531055000 |
| H | 5.801315000  | 2.039029000  | -0.995452000 |
| H | -5.827027000 | 1.705652000  | -1.393684000 |
| H | 4.883603000  | 6.018606000  | -3.798535000 |
| H | -4.919108000 | 5.870961000  | -3.919383000 |
| H | 7.709476000  | 3.400555000  | -1.861868000 |
| H | -7.728859000 | 2.963334000  | -2.419301000 |
| H | -6.915882000 | -4.308746000 | -4.943294000 |
| H | 7.167495000  | -4.209505000 | -4.713538000 |
| H | -7.237299000 | 5.071894000  | -3.683267000 |
| H | 7.214589000  | 5.407502000  | -3.280692000 |
| H | -1.952737000 | -2.921719000 | 0.616939000  |
| H | -0.876324000 | 1.367591000  | 5.097029000  |
| H | -0.013551000 | 0.065204000  | 4.790540000  |
| H | 0.006420000  | 4.004274000  | 0.582693000  |
| H | 0.655267000  | 4.296780000  | 2.628059000  |
| H | 0.914798000  | 4.286275000  | -0.675628000 |
| H | 1.959917000  | -0.178720000 | 3.573524000  |
| H | -1.949695000 | 2.784320000  | 0.814666000  |
| H | -0.606936000 | -2.000014000 | 5.098413000  |
| H | 0.890956000  | -4.441283000 | 2.132238000  |
| H | 0.747122000  | -4.423103000 | -1.076845000 |
| H | -0.004788000 | -4.146445000 | 0.852647000  |
| O | -1.065401000 | -0.093936000 | 2.178627000  |
| O | -3.616716000 | 1.285717000  | 2.168343000  |
| O | -3.611018000 | 1.325713000  | -0.642590000 |
| O | -3.613874000 | -1.510498000 | 2.083234000  |
| O | -2.048937000 | -2.652438000 | 3.234508000  |
| O | 0.032382000  | -4.081475000 | 1.869741000  |
| O | 2.075287000  | -2.836737000 | 2.985856000  |
| O | 2.059550000  | -2.653945000 | -1.723245000 |
| O | 3.631742000  | -1.528787000 | 2.020240000  |
| O | 3.614913000  | -1.403609000 | -0.714442000 |
| O | 3.640511000  | 1.279423000  | 2.101361000  |
| O | 3.581482000  | 1.388906000  | -0.620625000 |
| O | 2.009342000  | 2.638159000  | -1.607312000 |
| O | 2.097357000  | 2.452334000  | 3.247404000  |
| O | 1.063777000  | 1.408603000  | 0.742836000  |
| O | 1.406422000  | -0.121585000 | 2.784909000  |
| O | 0.037972000  | -1.517029000 | 4.570011000  |

|    |              |              |              |
|----|--------------|--------------|--------------|
| O  | -0.029786000 | 1.084958000  | 4.724569000  |
| O  | 1.059685000  | -1.546522000 | 0.697699000  |
| O  | -1.399939000 | -2.134820000 | 0.688966000  |
| O  | -2.033615000 | -2.465093000 | -1.859301000 |
| O  | -0.043349000 | -3.974232000 | -0.755517000 |
| O  | -3.646823000 | -1.396852000 | -0.736675000 |
| O  | -0.016017000 | 3.781724000  | 2.166721000  |
| O  | 0.039607000  | 3.949405000  | -0.437650000 |
| O  | -1.396674000 | 1.994357000  | 0.780820000  |
| O  | -2.047562000 | 2.253195000  | 3.460438000  |
| O  | -2.043505000 | 2.479393000  | -1.743738000 |
| O  | 1.364523000  | -0.029162000 | -1.337104000 |
| O  | -1.103325000 | -0.051023000 | -0.794015000 |
| H  | 1.838542000  | -0.069485000 | -2.188018000 |
| O  | 0.076066000  | 1.785420000  | -3.194818000 |
| H  | 0.994029000  | 1.943197000  | -3.451770000 |
| Hf | 2.521665000  | -0.082404000 | 0.691003000  |
| Hf | -0.019405000 | -1.866425000 | 2.494693000  |
| Hf | 0.029493000  | 1.708169000  | 2.519366000  |
| Hf | -0.036402000 | 1.700466000  | -1.040683000 |
| Hf | -2.547087000 | -0.076636000 | 0.708706000  |
| N  | -2.654413000 | -4.537182000 | -3.366340000 |
| H  | -2.076670000 | -4.347752000 | -2.548415000 |
| H  | -2.684445000 | -5.520520000 | -3.614303000 |
| N  | 2.784533000  | -4.435989000 | -3.571497000 |
| H  | 2.616337000  | -4.967416000 | -4.414409000 |
| H  | 1.989385000  | -3.957645000 | -3.163489000 |
| N  | 2.727184000  | 4.805195000  | -2.992166000 |
| H  | 1.984812000  | 4.124484000  | -2.886583000 |
| H  | 2.632541000  | 5.466025000  | -3.751208000 |
| N  | -2.771570000 | 4.730769000  | -2.990802000 |
| H  | -2.676124000 | 5.686931000  | -3.299119000 |
| H  | -2.012265000 | 4.317937000  | -2.463218000 |
| Hf | 0.009465000  | -1.864758000 | -1.088801000 |
| C  | -1.866133000 | -1.701196000 | -5.238489000 |
| C  | -0.457856000 | -2.273230000 | -5.380932000 |
| C  | 0.380452000  | -1.411518000 | -4.430953000 |
| C  | -1.715225000 | -0.183601000 | -5.310334000 |
| C  | 1.829285000  | -1.188709000 | -4.801980000 |
| C  | -2.671823000 | 0.568205000  | -4.410701000 |
| H  | 2.311554000  | -2.179656000 | -4.717209000 |
| H  | -0.104432000 | -2.125303000 | -6.422306000 |
| H  | -2.214533000 | -1.980198000 | -4.228981000 |
| H  | -1.945064000 | 2.304853000  | -3.964822000 |
| H  | 1.903128000  | -0.864349000 | -5.853530000 |
| H  | 3.384160000  | -0.353617000 | -3.964565000 |

|   |              |              |              |
|---|--------------|--------------|--------------|
| H | -2.483192000 | 0.260364000  | -3.359799000 |
| H | -3.692363000 | 0.226545000  | -4.658692000 |
| H | -1.142898000 | -3.871615000 | -4.523385000 |
| H | -0.232185000 | 0.818700000  | -4.182573000 |
| H | -2.527264000 | -2.030291000 | -7.024383000 |
| H | -1.855810000 | 0.155905000  | -6.353654000 |
| O | -2.812933000 | -2.225260000 | -6.123183000 |
| O | 2.424964000  | -0.250000000 | -3.928891000 |
| O | -2.599172000 | 1.949976000  | -4.587647000 |
| O | 0.098469000  | -1.565261000 | -3.202354000 |
| O | -0.358456000 | -3.625843000 | -5.058978000 |
| O | -0.338828000 | 0.091533000  | -4.969133000 |

Hf-NU-1000 (-NH<sub>2</sub>) Int2

|   |              |              |              |
|---|--------------|--------------|--------------|
| C | -3.248200000 | -2.182800000 | -1.650100000 |
| C | -3.229700000 | -2.386600000 | 2.900000000  |
| C | -3.232300000 | 2.034300000  | 3.104000000  |
| C | 3.276900000  | 2.142000000  | 2.939200000  |
| C | 3.226900000  | 2.366300000  | -1.338700000 |
| C | 3.259300000  | -2.277900000 | -1.561500000 |
| C | -3.265300000 | 2.236100000  | -1.457300000 |
| C | 3.257200000  | -2.506600000 | 2.716400000  |
| H | 4.088573000  | 2.683601000  | 3.472061000  |
| H | 4.064926000  | -3.148078000 | 3.133464000  |
| H | -4.032371000 | 2.543522000  | 3.684902000  |
| H | -4.030031000 | -2.990760000 | 3.380673000  |
| C | 5.594718000  | -2.309652000 | -2.388418000 |
| C | -5.525756000 | -2.211081000 | -2.624488000 |
| C | 4.289222000  | -2.828918000 | -2.473245000 |
| C | -4.244263000 | -2.783166000 | -2.564100000 |
| C | 4.004987000  | -3.832381000 | -3.449290000 |
| C | -3.939497000 | -3.902642000 | -3.384003000 |
| C | 5.057262000  | -4.241581000 | -4.299974000 |
| C | -4.949567000 | -4.397500000 | -4.227909000 |
| C | 6.328214000  | -3.704115000 | -4.193235000 |
| C | -6.202045000 | -3.806478000 | -4.280110000 |
| C | 6.612563000  | -2.727912000 | -3.230273000 |
| C | -6.501231000 | -2.699788000 | -3.478831000 |
| C | 5.618773000  | 2.957399000  | -1.574423000 |
| C | -5.657161000 | 2.651068000  | -1.902598000 |
| C | 4.278136000  | 3.255491000  | -1.879492000 |
| C | -4.320539000 | 3.057409000  | -2.066696000 |
| C | 3.988557000  | 4.398246000  | -2.681026000 |
| C | -4.039574000 | 4.248791000  | -2.799607000 |
| C | 5.073837000  | 5.177510000  | -3.137427000 |

|   |              |              |              |
|---|--------------|--------------|--------------|
| C | -5.135121000 | 4.969398000  | -3.327308000 |
| C | 6.382301000  | 4.855200000  | -2.820889000 |
| C | -6.437316000 | 4.536210000  | -3.156476000 |
| C | 6.669501000  | 3.735638000  | -2.031030000 |
| C | -6.714761000 | 3.364220000  | -2.440179000 |
| H | 5.776950000  | -1.550353000 | -1.625322000 |
| H | -5.721591000 | -1.355348000 | -1.974691000 |
| H | 4.848467000  | -5.008347000 | -5.051134000 |
| H | -4.722495000 | -5.256210000 | -4.865287000 |
| H | 7.614867000  | -2.305835000 | -3.142769000 |
| H | -7.486040000 | -2.231708000 | -3.521802000 |
| H | 5.802178000  | 2.079612000  | -0.952356000 |
| H | -5.832781000 | 1.739405000  | -1.328758000 |
| H | 4.860245000  | 6.056200000  | -3.752305000 |
| H | -4.931491000 | 5.884990000  | -3.889300000 |
| H | 7.700043000  | 3.481542000  | -1.778027000 |
| H | -7.742404000 | 3.023197000  | -2.305034000 |
| H | -6.956788000 | -4.213694000 | -4.957350000 |
| H | 7.111974000  | -4.051304000 | -4.871287000 |
| H | -7.253768000 | 5.121447000  | -3.587672000 |
| H | 7.192378000  | 5.486043000  | -3.195510000 |
| H | -1.952659000 | -2.925408000 | 0.625202000  |
| H | -0.873357000 | 1.394574000  | 5.084060000  |
| H | -0.011347000 | 0.090638000  | 4.792892000  |
| H | 0.010946000  | 4.005620000  | 0.565023000  |
| H | 0.653818000  | 4.303272000  | 2.619188000  |
| H | 0.907389000  | 4.292092000  | -0.701662000 |
| H | 1.962205000  | -0.165931000 | 3.573455000  |
| H | -1.949116000 | 2.781576000  | 0.802870000  |
| H | -0.607427000 | -1.981405000 | 5.116418000  |
| H | 0.891977000  | -4.434331000 | 2.159651000  |
| H | 0.753655000  | -4.427387000 | -1.037872000 |
| H | -0.011563000 | -4.152138000 | 0.884917000  |
| O | -1.064752000 | -0.092364000 | 2.178331000  |
| O | -3.616781000 | 1.285347000  | 2.168217000  |
| O | -3.607466000 | 1.311660000  | -0.652031000 |
| O | -3.611834000 | -1.511370000 | 2.082372000  |
| O | -2.049450000 | -2.645692000 | 3.244549000  |
| O | 0.030742000  | -4.079545000 | 1.898518000  |
| O | 2.075883000  | -2.831733000 | 2.995911000  |
| O | 2.060851000  | -2.676111000 | -1.698658000 |
| O | 3.629752000  | -1.529760000 | 2.017926000  |
| O | 3.615468000  | -1.405994000 | -0.715492000 |
| O | 3.641689000  | 1.279601000  | 2.100176000  |
| O | 3.584608000  | 1.378222000  | -0.631522000 |
| O | 2.012157000  | 2.630932000  | -1.608915000 |



|    |              |              |              |
|----|--------------|--------------|--------------|
| O  | 2.097684000  | 2.457436000  | 3.239107000  |
| O  | 1.064936000  | 1.400802000  | 0.727974000  |
| O  | 1.407279000  | -0.115873000 | 2.785377000  |
| O  | 0.037011000  | -1.503126000 | 4.583147000  |
| O  | -0.026107000 | 1.107254000  | 4.716500000  |
| O  | 1.060747000  | -1.548283000 | 0.708230000  |
| O  | -1.396702000 | -2.140883000 | 0.700166000  |
| O  | -2.029817000 | -2.465154000 | -1.862872000 |
| O  | -0.045367000 | -3.980458000 | -0.736149000 |
| O  | -3.641568000 | -1.412012000 | -0.723682000 |
| O  | -0.013341000 | 3.784910000  | 2.155758000  |
| O  | 0.038982000  | 3.946025000  | -0.452817000 |
| O  | -1.395992000 | 1.991376000  | 0.771361000  |
| O  | -2.046919000 | 2.258588000  | 3.454126000  |
| O  | -2.047614000 | 2.483757000  | -1.740602000 |
| O  | 1.353286000  | -0.049323000 | -1.364283000 |
| O  | -1.099791000 | -0.063490000 | -0.796585000 |
| H  | 1.841563000  | -0.097789000 | -2.205648000 |
| O  | 0.040019000  | 1.855499000  | -3.181762000 |
| H  | 0.952140000  | 1.930066000  | -3.488959000 |
| Hf | 2.523624000  | -0.074211000 | 0.689318000  |
| Hf | -0.021976000 | -1.858426000 | 2.513788000  |
| Hf | 0.031256000  | 1.714156000  | 2.502984000  |
| Hf | -0.041137000 | 1.704976000  | -1.073166000 |
| Hf | -2.547072000 | -0.071603000 | 0.705642000  |
| N  | -2.688509000 | -4.517290000 | -3.412837000 |
| H  | -2.099779000 | -4.329453000 | -2.602528000 |
| H  | -2.735854000 | -5.503235000 | -3.648206000 |
| N  | 2.779867000  | -4.421640000 | -3.582128000 |
| H  | 2.596234000  | -4.977905000 | -4.404954000 |
| H  | 1.992665000  | -3.994065000 | -3.109072000 |
| N  | 2.712350000  | 4.798234000  | -2.990448000 |
| H  | 1.979922000  | 4.103621000  | -2.902760000 |
| H  | 2.620033000  | 5.459979000  | -3.749068000 |
| N  | -2.778964000 | 4.715833000  | -3.009068000 |
| H  | -2.665170000 | 5.649146000  | -3.373446000 |
| H  | -2.001253000 | 4.265549000  | -2.542929000 |
| Hf | 0.009739000  | -1.871814000 | -1.049852000 |
| C  | -1.865704000 | -1.689229000 | -5.236880000 |
| C  | -0.472829000 | -2.303248000 | -5.428910000 |
| C  | 0.461538000  | -1.618831000 | -4.448865000 |
| C  | -1.790785000 | -0.167188000 | -5.393593000 |
| C  | 1.853495000  | -1.258150000 | -4.876360000 |
| C  | -2.709722000 | 0.546879000  | -4.417848000 |
| H  | 2.384898000  | -2.227842000 | -4.952216000 |
| H  | -0.120718000 | -2.124813000 | -6.464249000 |

|                                        |              |              |              |
|----------------------------------------|--------------|--------------|--------------|
| H                                      | -2.153648000 | -1.934707000 | -4.199283000 |
| H                                      | -1.935459000 | 2.271736000  | -4.037941000 |
| H                                      | 1.823991000  | -0.822258000 | -5.888436000 |
| H                                      | 3.423024000  | -0.534486000 | -3.972921000 |
| H                                      | -2.434360000 | 0.232724000  | -3.386611000 |
| H                                      | -3.741102000 | 0.191400000  | -4.586937000 |
| H                                      | -1.267206000 | -3.908387000 | -4.662254000 |
| H                                      | -0.358714000 | 0.861258000  | -4.446175000 |
| H                                      | -2.660443000 | -2.062514000 | -6.959076000 |
| H                                      | -2.091116000 | 0.095938000  | -6.428132000 |
| O                                      | -2.841105000 | -2.293156000 | -6.039137000 |
| O                                      | 2.467167000  | -0.400363000 | -3.946064000 |
| O                                      | -2.674267000 | 1.933085000  | -4.569508000 |
| O                                      | 0.154677000  | -1.646142000 | -3.253745000 |
| O                                      | -0.459229000 | -3.681233000 | -5.174737000 |
| O                                      | -0.440161000 | 0.238754000  | -5.225857000 |
| Hf-NU-1000 (-NH <sub>2</sub> ) Int2_Ro |              |              |              |
| C                                      | -3.248200000 | -2.182800000 | -1.650100000 |
| C                                      | -3.229700000 | -2.386600000 | 2.900000000  |
| C                                      | -3.232300000 | 2.034300000  | 3.104000000  |
| C                                      | 3.276900000  | 2.142000000  | 2.939200000  |
| C                                      | 3.226900000  | 2.366300000  | -1.338700000 |
| C                                      | 3.259300000  | -2.277900000 | -1.561500000 |
| C                                      | -3.265300000 | 2.236100000  | -1.457300000 |
| C                                      | 3.257200000  | -2.506600000 | 2.716400000  |
| H                                      | 4.087220000  | 2.713723000  | 3.442232000  |
| H                                      | 4.060763000  | -3.135989000 | 3.159250000  |
| H                                      | -4.032503000 | 2.565468000  | 3.665240000  |
| H                                      | -4.030845000 | -2.959864000 | 3.415418000  |
| C                                      | 5.646494000  | -2.745035000 | -2.008143000 |
| C                                      | -5.591205000 | -2.559037000 | -2.375729000 |
| C                                      | 4.306382000  | -2.894196000 | -2.405086000 |
| C                                      | -4.262833000 | -3.019317000 | -2.325019000 |
| C                                      | 4.012544000  | -3.606621000 | -3.604538000 |
| C                                      | -3.923658000 | -4.280029000 | -2.903218000 |
| C                                      | 5.093920000  | -4.147445000 | -4.331588000 |
| C                                      | -4.964898000 | -5.005172000 | -3.529862000 |
| C                                      | 6.403235000  | -3.996428000 | -3.905212000 |
| C                                      | -6.256581000 | -4.513297000 | -3.591219000 |
| C                                      | 6.694113000  | -3.288606000 | -2.733917000 |
| C                                      | -6.587240000 | -3.277416000 | -3.016900000 |
| C                                      | 5.594099000  | 2.996805000  | -1.679379000 |
| C                                      | -5.666171000 | 2.613455000  | -1.902641000 |
| C                                      | 4.248443000  | 3.151754000  | -2.053931000 |
| C                                      | -4.330034000 | 2.912971000  | -2.220819000 |
| C                                      | 3.916018000  | 4.033585000  | -3.123885000 |

|   |              |              |              |
|---|--------------|--------------|--------------|
| C | -4.056845000 | 3.812634000  | -3.291267000 |
| C | 4.975511000  | 4.725212000  | -3.753238000 |
| C | -5.154963000 | 4.366488000  | -3.984951000 |
| C | 6.290103000  | 4.563638000  | -3.350919000 |
| C | -6.459499000 | 4.053967000  | -3.643836000 |
| C | 6.615785000  | 3.694056000  | -2.302909000 |
| C | -6.729603000 | 3.170312000  | -2.592014000 |
| H | 5.833372000  | -2.180839000 | -1.092664000 |
| H | -5.800897000 | -1.596508000 | -1.902458000 |
| H | 4.878815000  | -4.694073000 | -5.254111000 |
| H | -4.727059000 | -5.973584000 | -3.978109000 |
| H | 7.725015000  | -3.164984000 | -2.398636000 |
| H | -7.609054000 | -2.897258000 | -3.061734000 |
| H | 5.805425000  | 2.299488000  | -0.866419000 |
| H | -5.836392000 | 1.909386000  | -1.086581000 |
| H | 4.735572000  | 5.403413000  | -4.577098000 |
| H | -4.954325000 | 5.055472000  | -4.810312000 |
| H | 7.652243000  | 3.563911000  | -1.987508000 |
| H | -7.757650000 | 2.922421000  | -2.322783000 |
| H | -7.025629000 | -5.104706000 | -4.094617000 |
| H | 7.210578000  | -4.436080000 | -4.496404000 |
| H | -7.280698000 | 4.506665000  | -4.205768000 |
| H | 7.076737000  | 5.122171000  | -3.864979000 |
| H | -1.959410000 | -2.906324000 | 0.570650000  |
| H | -0.886663000 | 1.323759000  | 5.109261000  |
| H | -0.018665000 | 0.028229000  | 4.794229000  |
| H | 0.024194000  | 4.035815000  | 0.649029000  |
| H | 0.671382000  | 4.278735000  | 2.702889000  |
| H | 0.888684000  | 4.341853000  | -0.646679000 |
| H | 1.958102000  | -0.214328000 | 3.575218000  |
| H | -1.942503000 | 2.797423000  | 0.843256000  |
| H | -0.600770000 | -2.053486000 | 5.076310000  |
| H | 0.912500000  | -4.426045000 | 2.015829000  |
| H | 0.695121000  | -4.352101000 | -1.219009000 |
| H | -0.017257000 | -4.124491000 | 0.769214000  |
| O | -1.066219000 | -0.105883000 | 2.176560000  |
| O | -3.616167000 | 1.282936000  | 2.171045000  |
| O | -3.606778000 | 1.382632000  | -0.581264000 |
| O | -3.608778000 | -1.509908000 | 2.082262000  |
| O | -2.044985000 | -2.681835000 | 3.201530000  |
| O | 0.039465000  | -4.082154000 | 1.779169000  |
| O | 2.071604000  | -2.858795000 | 2.947986000  |
| O | 2.042805000  | -2.585288000 | -1.794787000 |
| O | 3.634250000  | -1.518489000 | 2.039057000  |
| O | 3.608567000  | -1.455000000 | -0.668032000 |
| O | 3.644407000  | 1.273924000  | 2.110305000  |

|    |              |              |              |
|----|--------------|--------------|--------------|
| O  | 3.601366000  | 1.406850000  | -0.595520000 |
| O  | 2.007246000  | 2.681297000  | -1.504281000 |
| O  | 2.098878000  | 2.431985000  | 3.269521000  |
| O  | 1.067501000  | 1.407054000  | 0.777239000  |
| O  | 1.404612000  | -0.143588000 | 2.787676000  |
| O  | 0.036929000  | -1.557596000 | 4.551213000  |
| O  | -0.036837000 | 1.047007000  | 4.739777000  |
| O  | 1.053258000  | -1.542608000 | 0.673490000  |
| O  | -1.404206000 | -2.120312000 | 0.635677000  |
| O  | -2.035864000 | -2.334629000 | -1.996595000 |
| O  | -0.092627000 | -3.910650000 | -0.880806000 |
| O  | -3.632422000 | -1.374656000 | -0.750836000 |
| O  | -0.005515000 | 3.778274000  | 2.233856000  |
| O  | 0.030832000  | 3.989641000  | -0.369758000 |
| O  | -1.383520000 | 2.011649000  | 0.807533000  |
| O  | -2.050078000 | 2.236630000  | 3.476441000  |
| O  | -2.051089000 | 2.513730000  | -1.722680000 |
| O  | 1.381372000  | 0.008797000  | -1.328277000 |
| O  | -1.087496000 | -0.002918000 | -0.798516000 |
| H  | 1.914423000  | 0.045052000  | -2.148274000 |
| O  | 0.136589000  | 1.905749000  | -3.124730000 |
| H  | -0.667172000 | 1.889503000  | -3.657296000 |
| Hf | 2.532040000  | -0.061600000 | 0.696403000  |
| Hf | -0.023944000 | -1.875640000 | 2.472935000  |
| Hf | 0.033532000  | 1.700011000  | 2.541809000  |
| Hf | -0.020412000 | 1.777348000  | -1.021272000 |
| Hf | -2.540018000 | -0.053174000 | 0.701031000  |
| N  | -2.661603000 | -4.792554000 | -2.896033000 |
| H  | -1.924794000 | -4.356229000 | -2.344969000 |
| H  | -2.554929000 | -5.770892000 | -3.121689000 |
| N  | 2.741275000  | -3.726802000 | -4.117356000 |
| H  | 2.602644000  | -4.437231000 | -4.823775000 |
| H  | 1.976529000  | -3.594020000 | -3.464822000 |
| N  | 2.635075000  | 4.253721000  | -3.556765000 |
| H  | 1.908861000  | 3.600691000  | -3.275768000 |
| H  | 2.541571000  | 4.658032000  | -4.478194000 |
| N  | -2.786871000 | 4.116838000  | -3.709308000 |
| H  | -2.688064000 | 4.942106000  | -4.284198000 |
| H  | -2.033636000 | 3.915377000  | -3.060167000 |
| Hf | 0.018724000  | -1.788274000 | -1.101749000 |
| C  | -1.389485000 | -0.724353000 | -5.964342000 |
| C  | -0.214969000 | -1.713023000 | -5.699361000 |
| C  | 0.575297000  | -1.188930000 | -4.515349000 |
| C  | -2.454663000 | -0.758770000 | -4.877612000 |
| C  | 1.786383000  | -0.359381000 | -4.825380000 |
| C  | -3.495068000 | 0.345358000  | -4.997114000 |

|   |              |              |              |
|---|--------------|--------------|--------------|
| H | 2.573977000  | -1.113625000 | -5.031594000 |
| H | 0.450068000  | -1.666807000 | -6.585921000 |
| H | -1.880345000 | -1.054920000 | -6.901486000 |
| H | -5.072287000 | -0.606127000 | -4.395047000 |
| H | 1.609958000  | 0.138614000  | -5.800243000 |
| H | 1.450283000  | 1.145529000  | -3.668630000 |
| H | -3.867914000 | 0.406421000  | -6.038385000 |
| H | -3.046446000 | 1.320581000  | -4.757158000 |
| H | -1.534053000 | -3.021198000 | -5.183009000 |
| H | -3.546262000 | -2.232524000 | -4.190883000 |
| H | -0.491113000 | 0.724237000  | -6.916205000 |
| H | -1.990695000 | -0.674570000 | -3.875822000 |
| O | -0.920018000 | 0.603319000  | -6.062568000 |
| O | 2.213085000  | 0.509739000  | -3.846474000 |
| O | -4.535141000 | 0.130042000  | -4.076843000 |
| O | 0.206057000  | -1.463835000 | -3.380508000 |
| O | -0.616888000 | -3.029377000 | -5.521420000 |
| O | -3.076804000 | -2.031381000 | -5.015872000 |

Hf-NU-1000 (-NH<sub>2</sub>) TS3

|   |              |              |              |
|---|--------------|--------------|--------------|
| C | -3.248200000 | -2.182800000 | -1.650100000 |
| C | -3.229700000 | -2.386600000 | 2.900000000  |
| C | -3.232300000 | 2.034300000  | 3.104000000  |
| C | 3.276900000  | 2.142000000  | 2.939200000  |
| C | 3.226900000  | 2.366300000  | -1.338700000 |
| C | 3.259300000  | -2.277900000 | -1.561500000 |
| C | -3.265300000 | 2.236100000  | -1.457300000 |
| C | 3.257200000  | -2.506600000 | 2.716400000  |
| H | 4.087523000  | 2.724834000  | 3.429417000  |
| H | 4.061388000  | -3.139635000 | 3.151934000  |
| H | -4.031759000 | 2.579271000  | 3.653121000  |
| H | -4.033143000 | -2.976987000 | 3.391980000  |
| C | 5.652264000  | -2.588217000 | -2.111458000 |
| C | -5.394529000 | -1.824621000 | -2.811084000 |
| C | 4.310813000  | -2.920563000 | -2.373278000 |
| C | -4.303031000 | -2.670750000 | -2.560886000 |
| C | 4.016214000  | -3.841981000 | -3.422277000 |
| C | -4.194698000 | -3.907974000 | -3.251263000 |
| C | 5.100031000  | -4.375351000 | -4.155158000 |
| C | -5.183381000 | -4.210061000 | -4.211313000 |
| C | 6.408960000  | -4.029414000 | -3.868693000 |
| C | -6.230172000 | -3.338832000 | -4.468605000 |
| C | 6.700682000  | -3.129026000 | -2.836657000 |
| C | -6.353119000 | -2.136116000 | -3.763347000 |
| C | 5.596779000  | 3.045303000  | -1.484001000 |
| C | -5.572751000 | 2.190495000  | -2.359694000 |

|   |              |              |              |
|---|--------------|--------------|--------------|
| C | 4.280949000  | 3.191924000  | -1.960148000 |
| C | -4.262505000 | 2.686666000  | -2.458109000 |
| C | 4.027160000  | 4.100602000  | -3.026707000 |
| C | -3.918247000 | 3.519691000  | -3.558678000 |
| C | 5.120256000  | 4.817192000  | -3.559388000 |
| C | -4.916068000 | 3.804646000  | -4.512250000 |
| C | 6.402072000  | 4.658179000  | -3.061734000 |
| C | -6.200077000 | 3.294125000  | -4.393363000 |
| C | 6.653801000  | 3.768435000  | -2.010561000 |
| C | -6.542220000 | 2.477790000  | -3.309747000 |
| H | 5.838975000  | -1.875803000 | -1.306217000 |
| H | -5.439715000 | -0.887903000 | -2.249626000 |
| H | 4.883905000  | -5.081189000 | -4.961978000 |
| H | -5.110458000 | -5.154738000 | -4.756741000 |
| H | 7.732339000  | -2.854631000 | -2.611073000 |
| H | -7.175095000 | -1.448348000 | -3.972098000 |
| H | 5.756115000  | 2.332181000  | -0.673237000 |
| H | -5.800425000 | 1.556523000  | -1.500702000 |
| H | 4.934457000  | 5.512736000  | -4.382420000 |
| H | -4.659308000 | 4.444883000  | -5.361116000 |
| H | 7.663773000  | 3.641180000  | -1.617817000 |
| H | -7.554757000 | 2.083326000  | -3.205033000 |
| H | -6.965717000 | -3.602435000 | -5.232835000 |
| H | 7.217262000  | -4.467412000 | -4.460014000 |
| H | -6.947300000 | 3.547134000  | -5.150629000 |
| H | 7.220063000  | 5.234838000  | -3.500991000 |
| H | -1.942158000 | -2.909375000 | 0.595807000  |
| H | -0.883459000 | 1.299347000  | 5.151949000  |
| H | -0.017514000 | 0.001502000  | 4.814990000  |
| H | 0.060563000  | 4.020911000  | 0.689128000  |
| H | 0.675628000  | 4.263963000  | 2.730536000  |
| H | 0.996601000  | 4.271849000  | -0.569311000 |
| H | 1.966961000  | -0.214656000 | 3.595320000  |
| H | -1.914522000 | 2.797212000  | 0.851625000  |
| H | -0.612100000 | -2.051428000 | 5.080015000  |
| H | 0.877808000  | -4.469497000 | 2.122072000  |
| H | 0.773599000  | -4.386857000 | -1.100390000 |
| H | 0.014850000  | -4.139018000 | 0.821775000  |
| O | -1.059479000 | -0.105118000 | 2.199443000  |
| O | -3.616308000 | 1.285145000  | 2.170471000  |
| O | -3.628076000 | 1.396141000  | -0.583870000 |
| O | -3.610933000 | -1.502998000 | 2.088682000  |
| O | -2.049114000 | -2.665592000 | 3.220922000  |
| O | 0.034502000  | -4.084849000 | 1.847160000  |
| O | 2.074491000  | -2.844186000 | 2.967860000  |
| O | 2.052869000  | -2.611005000 | -1.753634000 |

|    |              |              |              |
|----|--------------|--------------|--------------|
| O  | 3.638479000  | -1.526976000 | 2.026689000  |
| O  | 3.609335000  | -1.402173000 | -0.705927000 |
| O  | 3.642198000  | 1.270874000  | 2.114143000  |
| O  | 3.574284000  | 1.428285000  | -0.570011000 |
| O  | 1.998496000  | 2.635052000  | -1.605210000 |
| O  | 2.100251000  | 2.427249000  | 3.282882000  |
| O  | 1.080560000  | 1.406665000  | 0.796500000  |
| O  | 1.412808000  | -0.143757000 | 2.808333000  |
| O  | 0.037539000  | -1.559386000 | 4.565745000  |
| O  | -0.037713000 | 1.026830000  | 4.770521000  |
| O  | 1.060387000  | -1.519570000 | 0.684133000  |
| O  | -1.388148000 | -2.123777000 | 0.677088000  |
| O  | -2.052676000 | -2.538741000 | -1.879822000 |
| O  | -0.004388000 | -3.942786000 | -0.743524000 |
| O  | -3.582258000 | -1.376578000 | -0.726882000 |
| O  | 0.000613000  | 3.766158000  | 2.255486000  |
| O  | 0.107769000  | 3.969684000  | -0.333760000 |
| O  | -1.366646000 | 2.003112000  | 0.852081000  |
| O  | -2.052662000 | 2.223309000  | 3.493596000  |
| O  | -2.065170000 | 2.651140000  | -1.575901000 |
| O  | 1.350610000  | 0.015741000  | -1.362289000 |
| O  | -1.100536000 | -0.003384000 | -0.772642000 |
| H  | 1.823972000  | 0.014567000  | -2.217152000 |
| O  | -0.220730000 | 1.690985000  | -3.182012000 |
| H  | -0.654223000 | 2.494847000  | -3.509129000 |
| Hf | 2.543642000  | -0.092354000 | 0.695116000  |
| Hf | -0.008443000 | -1.885147000 | 2.481279000  |
| Hf | 0.037009000  | 1.682889000  | 2.586642000  |
| Hf | -0.012121000 | 1.738831000  | -0.928502000 |
| Hf | -2.536621000 | -0.071816000 | 0.732682000  |
| N  | -3.220999000 | -4.826967000 | -2.960881000 |
| H  | -2.394739000 | -4.502751000 | -2.469610000 |
| H  | -3.049991000 | -5.540429000 | -3.655795000 |
| N  | 2.746968000  | -4.247102000 | -3.729643000 |
| H  | 2.602483000  | -4.713712000 | -4.613484000 |
| H  | 1.974686000  | -3.727491000 | -3.328814000 |
| N  | 2.773957000  | 4.324100000  | -3.540709000 |
| H  | 2.066619000  | 3.637741000  | -3.304221000 |
| H  | 2.741344000  | 4.698889000  | -4.479181000 |
| N  | -2.641082000 | 4.018070000  | -3.756637000 |
| H  | -2.604986000 | 4.826969000  | -4.366112000 |
| H  | -2.103742000 | 4.118797000  | -2.899731000 |
| Hf | 0.006942000  | -1.842739000 | -1.113697000 |
| C  | -1.937385000 | -0.028235000 | -4.991687000 |
| C  | -0.687948000 | -2.133975000 | -5.304638000 |
| C  | 0.234514000  | -1.517638000 | -4.484864000 |

|   |              |              |              |
|---|--------------|--------------|--------------|
| C | -3.116063000 | -0.600795000 | -5.699697000 |
| C | 1.436172000  | -0.770087000 | -5.009015000 |
| C | -4.284822000 | 0.365057000  | -5.539737000 |
| H | 2.274149000  | -1.483693000 | -5.100536000 |
| H | -0.631914000 | -2.127924000 | -6.394115000 |
| H | -1.220408000 | 0.546648000  | -5.612239000 |
| H | -6.076635000 | 0.452956000  | -6.267228000 |
| H | 1.236566000  | -0.410388000 | -6.037947000 |
| H | 1.156984000  | 0.872851000  | -3.984628000 |
| H | -3.974637000 | 1.378108000  | -5.868905000 |
| H | -4.559520000 | 0.427784000  | -4.470417000 |
| H | -1.628141000 | -2.852023000 | -3.822449000 |
| H | -3.644069000 | -0.913413000 | -7.501603000 |
| H | -1.092645000 | 0.897208000  | -3.391693000 |
| H | -3.399303000 | -1.557758000 | -5.211131000 |
| O | -2.011169000 | 0.170525000  | -3.748043000 |
| O | 1.893685000  | 0.253181000  | -4.162497000 |
| O | -5.322919000 | -0.141051000 | -6.342026000 |
| O | 0.077064000  | -1.608132000 | -3.207545000 |
| O | -1.603719000 | -2.983064000 | -4.795686000 |
| O | -2.797796000 | -0.777586000 | -7.054301000 |

Hf-NU-1000 (-NH<sub>2</sub>) Int3

|   |              |              |              |
|---|--------------|--------------|--------------|
| C | -3.248200000 | -2.182800000 | -1.650100000 |
| C | -3.229700000 | -2.386600000 | 2.900000000  |
| C | -3.232300000 | 2.034300000  | 3.104000000  |
| C | 3.276900000  | 2.142000000  | 2.939200000  |
| C | 3.226900000  | 2.366300000  | -1.338700000 |
| C | 3.259300000  | -2.277900000 | -1.561500000 |
| C | -3.265300000 | 2.236100000  | -1.457300000 |
| C | 3.257200000  | -2.506600000 | 2.716400000  |
| H | 4.087687000  | 2.731821000  | 3.420766000  |
| H | 4.060583000  | -3.134535000 | 3.160363000  |
| H | -4.031012000 | 2.588539000  | 3.644845000  |
| H | -4.032762000 | -2.970605000 | 3.400192000  |
| C | 5.658357000  | -2.638439000 | -2.050814000 |
| C | -5.461656000 | -1.971063000 | -2.731745000 |
| C | 4.317527000  | -2.953793000 | -2.336663000 |
| C | -4.307934000 | -2.737547000 | -2.523752000 |
| C | 4.030851000  | -3.893232000 | -3.372054000 |
| C | -4.152910000 | -3.981360000 | -3.200396000 |
| C | 5.122258000  | -4.459954000 | -4.067847000 |
| C | -5.167353000 | -4.364369000 | -4.106200000 |
| C | 6.430040000  | -4.129619000 | -3.759021000 |
| C | -6.288801000 | -3.575470000 | -4.312289000 |
| C | 6.713570000  | -3.212020000 | -2.739849000 |



|   |              |              |              |
|---|--------------|--------------|--------------|
| C | -6.454098000 | -2.366652000 | -3.621462000 |
| C | 5.599172000  | 3.028056000  | -1.495527000 |
| C | -5.533827000 | 2.202881000  | -2.454980000 |
| C | 4.281875000  | 3.185711000  | -1.965157000 |
| C | -4.208022000 | 2.659611000  | -2.517819000 |
| C | 4.030736000  | 4.098978000  | -3.028504000 |
| C | -3.784368000 | 3.407087000  | -3.649933000 |
| C | 5.127104000  | 4.807450000  | -3.565366000 |
| C | -4.714720000 | 3.635724000  | -4.679367000 |
| C | 6.409941000  | 4.636728000  | -3.074687000 |
| C | -6.018375000 | 3.166217000  | -4.595527000 |
| C | 6.659370000  | 3.742999000  | -2.026227000 |
| C | -6.442692000 | 2.449341000  | -3.473526000 |
| H | 5.838932000  | -1.912459000 | -1.256385000 |
| H | -5.540929000 | -1.030257000 | -2.181310000 |
| H | 4.912435000  | -5.179555000 | -4.864054000 |
| H | -5.061010000 | -5.313126000 | -4.638428000 |
| H | 7.744363000  | -2.949897000 | -2.496378000 |
| H | -7.341225000 | -1.748494000 | -3.776885000 |
| H | 5.757017000  | 2.312692000  | -0.686549000 |
| H | -5.820569000 | 1.630871000  | -1.570305000 |
| H | 4.942816000  | 5.506226000  | -4.385957000 |
| H | -4.395509000 | 4.202570000  | -5.558749000 |
| H | 7.670150000  | 3.606486000  | -1.638786000 |
| H | -7.469017000 | 2.084766000  | -3.402282000 |
| H | -7.054073000 | -3.913961000 | -5.016867000 |
| H | 7.243921000  | -4.593509000 | -4.322285000 |
| H | -6.712145000 | 3.365658000  | -5.415771000 |
| H | 7.230532000  | 5.207213000  | -3.517092000 |
| H | -1.944181000 | -2.900352000 | 0.583464000  |
| H | -0.878412000 | 1.273636000  | 5.176562000  |
| H | -0.018527000 | -0.024888000 | 4.815176000  |
| H | 0.064816000  | 4.026415000  | 0.723133000  |
| H | 0.679178000  | 4.254085000  | 2.757972000  |
| H | 1.001394000  | 4.292625000  | -0.533758000 |
| H | 1.963842000  | -0.226202000 | 3.595164000  |
| H | -1.912693000 | 2.804137000  | 0.862983000  |
| H | -0.612312000 | -2.069844000 | 5.062772000  |
| H | 0.874475000  | -4.472579000 | 2.084837000  |
| H | 0.762775000  | -4.372797000 | -1.140659000 |
| H | 0.016167000  | -4.126670000 | 0.782707000  |
| O | -1.061483000 | -0.106009000 | 2.195952000  |
| O | -3.616435000 | 1.284821000  | 2.171182000  |
| O | -3.653220000 | 1.415093000  | -0.579001000 |
| O | -3.612724000 | -1.503058000 | 2.088311000  |
| O | -2.048336000 | -2.671921000 | 3.210761000  |

|    |              |              |              |
|----|--------------|--------------|--------------|
| O  | 0.034236000  | -4.080739000 | 1.811089000  |
| O  | 2.073774000  | -2.849055000 | 2.956570000  |
| O  | 2.052619000  | -2.587562000 | -1.780071000 |
| O  | 3.639792000  | -1.526306000 | 2.027480000  |
| O  | 3.606893000  | -1.396905000 | -0.708225000 |
| O  | 3.640610000  | 1.270725000  | 2.114121000  |
| O  | 3.570022000  | 1.435207000  | -0.562799000 |
| O  | 1.994654000  | 2.636454000  | -1.608318000 |
| O  | 2.101174000  | 2.420057000  | 3.293312000  |
| O  | 1.078662000  | 1.414180000  | 0.811651000  |
| O  | 1.410698000  | -0.148862000 | 2.808029000  |
| O  | 0.036820000  | -1.572750000 | 4.552724000  |
| O  | -0.038591000 | 1.003487000  | 4.781151000  |
| O  | 1.060421000  | -1.512771000 | 0.673063000  |
| O  | -1.395473000 | -2.111100000 | 0.664235000  |
| O  | -2.055391000 | -2.525532000 | -1.882933000 |
| O  | -0.008969000 | -3.926700000 | -0.772833000 |
| O  | -3.593308000 | -1.359093000 | -0.745514000 |
| O  | 0.000618000  | 3.762400000  | 2.281411000  |
| O  | 0.115490000  | 3.980249000  | -0.301574000 |
| O  | -1.367049000 | 2.008459000  | 0.871144000  |
| O  | -2.054518000 | 2.213969000  | 3.503831000  |
| O  | -2.059411000 | 2.651184000  | -1.544370000 |
| O  | 1.346902000  | 0.042326000  | -1.357968000 |
| O  | -1.108622000 | 0.020198000  | -0.777418000 |
| H  | 1.817386000  | 0.060857000  | -2.217219000 |
| O  | -0.287871000 | 1.696970000  | -3.233258000 |
| H  | -0.842844000 | 2.451129000  | -3.524558000 |
| Hf | 2.543386000  | -0.095668000 | 0.695742000  |
| Hf | -0.008911000 | -1.889489000 | 2.463283000  |
| Hf | 0.032477000  | 1.676322000  | 2.607118000  |
| Hf | -0.005249000 | 1.751777000  | -0.895571000 |
| Hf | -2.541327000 | -0.068131000 | 0.730065000  |
| N  | -3.113884000 | -4.828778000 | -2.947203000 |
| H  | -2.294922000 | -4.459192000 | -2.475167000 |
| H  | -2.938620000 | -5.561041000 | -3.620674000 |
| N  | 2.762522000  | -4.288125000 | -3.700037000 |
| H  | 2.635127000  | -4.748909000 | -4.590168000 |
| H  | 1.990633000  | -3.732906000 | -3.348705000 |
| N  | 2.777213000  | 4.335124000  | -3.535223000 |
| H  | 2.065358000  | 3.654845000  | -3.295594000 |
| H  | 2.741958000  | 4.714341000  | -4.471790000 |
| N  | -2.478108000 | 3.877729000  | -3.807140000 |
| H  | -2.414151000 | 4.621479000  | -4.494853000 |
| H  | -2.042253000 | 4.128667000  | -2.922968000 |
| Hf | 0.004551000  | -1.821389000 | -1.144163000 |

|   |              |              |              |
|---|--------------|--------------|--------------|
| C | -2.212440000 | -0.099438000 | -5.023197000 |
| C | -0.375199000 | -2.333458000 | -5.316294000 |
| C | 0.388255000  | -1.593945000 | -4.464512000 |
| C | -3.257639000 | -0.898552000 | -5.719194000 |
| C | 1.673232000  | -0.920780000 | -4.860442000 |
| C | -4.603315000 | -0.164682000 | -5.677374000 |
| H | 2.520100000  | -1.602025000 | -4.664897000 |
| H | -0.206753000 | -2.413156000 | -6.390690000 |
| H | -1.474604000 | 0.421394000  | -5.682862000 |
| H | -5.818105000 | -1.648948000 | -5.825394000 |
| H | 1.681707000  | -0.725584000 | -5.949677000 |
| H | 1.190884000  | 0.827058000  | -4.107479000 |
| H | -4.508148000 | 0.808540000  | -6.185023000 |
| H | -4.896854000 | 0.029473000  | -4.629764000 |
| H | -1.478271000 | -2.897685000 | -3.894701000 |
| H | -3.684182000 | -1.395915000 | -7.501567000 |
| H | -0.960220000 | 0.945118000  | -3.349493000 |
| H | -3.373647000 | -1.845998000 | -5.146819000 |
| O | -2.227979000 | 0.071445000  | -3.809904000 |
| O | 1.968786000  | 0.244643000  | -4.112586000 |
| O | -5.560084000 | -0.903551000 | -6.389762000 |
| O | 0.043384000  | -1.563554000 | -3.194130000 |
| O | -1.384256000 | -3.110097000 | -4.846289000 |
| O | -2.873267000 | -1.130280000 | -7.044594000 |

Hf-NU-1000 (-NH<sub>2</sub>) TS4

|   |              |              |              |
|---|--------------|--------------|--------------|
| C | -3.248200000 | -2.182800000 | -1.650100000 |
| C | -3.229700000 | -2.386600000 | 2.900000000  |
| C | -3.232300000 | 2.034300000  | 3.104000000  |
| C | 3.276900000  | 2.142000000  | 2.939200000  |
| C | 3.226900000  | 2.366300000  | -1.338700000 |
| C | 3.259300000  | -2.277900000 | -1.561500000 |
| C | -3.265300000 | 2.236100000  | -1.457300000 |
| C | 3.257200000  | -2.506600000 | 2.716400000  |
| H | 4.084488000  | 2.698647000  | 3.462716000  |
| H | 4.063847000  | -3.144169000 | 3.141373000  |
| H | -4.033346000 | 2.538505000  | 3.687713000  |
| H | -4.031641000 | -2.989019000 | 3.379900000  |
| C | 5.631513000  | -2.370034000 | -2.285569000 |
| C | -5.624315000 | -2.244645000 | -2.323157000 |
| C | 4.306975000  | -2.810255000 | -2.468071000 |
| C | -4.305356000 | -2.679620000 | -2.548779000 |
| C | 4.027581000  | -3.749693000 | -3.505464000 |
| C | -4.034251000 | -3.526603000 | -3.664104000 |
| C | 5.108133000  | -4.209616000 | -4.291191000 |
| C | -5.123090000 | -3.907602000 | -4.482552000 |

|   |              |              |              |
|---|--------------|--------------|--------------|
| C | 6.400627000  | -3.761672000 | -4.078427000 |
| C | -6.406834000 | -3.458340000 | -4.235549000 |
| C | 6.676313000  | -2.827516000 | -3.072664000 |
| C | -6.673370000 | -2.610153000 | -3.150234000 |
| C | 5.573024000  | 3.114798000  | -1.573386000 |
| C | -5.682036000 | 2.687837000  | -1.700603000 |
| C | 4.247591000  | 3.165233000  | -2.038336000 |
| C | -4.358678000 | 3.079035000  | -1.980811000 |
| C | 3.935222000  | 3.947150000  | -3.189540000 |
| C | -4.132820000 | 4.280692000  | -2.715361000 |
| C | 4.994616000  | 4.652814000  | -3.804710000 |
| C | -5.266447000 | 4.989911000  | -3.181837000 |
| C | 6.286833000  | 4.598722000  | -3.311924000 |
| C | -6.553289000 | 4.564559000  | -2.909261000 |
| C | 6.592523000  | 3.826666000  | -2.183903000 |
| C | -6.777759000 | 3.406543000  | -2.150404000 |
| H | 5.809348000  | -1.650000000 | -1.484666000 |
| H | -5.790312000 | -1.591330000 | -1.463998000 |
| H | 4.902852000  | -4.933180000 | -5.085059000 |
| H | -4.926178000 | -4.558518000 | -5.338508000 |
| H | 7.693992000  | -2.471629000 | -2.905621000 |
| H | -7.685429000 | -2.248498000 | -2.961351000 |
| H | 5.770035000  | 2.489622000  | -0.699861000 |
| H | -5.813567000 | 1.782360000  | -1.102949000 |
| H | 4.772204000  | 5.254351000  | -4.690522000 |
| H | -5.103167000 | 5.904279000  | -3.758562000 |
| H | 7.611912000  | 3.783045000  | -1.797166000 |
| H | -7.793910000 | 3.081007000  | -1.919709000 |
| H | -7.217460000 | -3.768474000 | -4.900045000 |
| H | 7.207527000  | -4.144361000 | -4.708489000 |
| H | -7.398834000 | 5.145377000  | -3.286115000 |
| H | 7.073019000  | 5.165567000  | -3.817408000 |
| H | -1.945791000 | -2.928853000 | 0.623316000  |
| H | -0.871930000 | 1.380337000  | 5.092901000  |
| H | -0.013458000 | 0.074301000  | 4.792183000  |
| H | 0.012609000  | 4.008456000  | 0.560140000  |
| H | 0.649660000  | 4.297512000  | 2.617908000  |
| H | 0.888314000  | 4.272883000  | -0.735433000 |
| H | 1.963875000  | -0.174759000 | 3.580850000  |
| H | -1.933346000 | 2.781498000  | 0.794241000  |
| H | -0.616325000 | -1.991912000 | 5.102176000  |
| H | 0.891709000  | -4.449392000 | 2.177199000  |
| H | 0.727906000  | -4.454079000 | -1.030999000 |
| H | -0.008329000 | -4.162366000 | 0.896574000  |
| O | -1.059478000 | -0.096511000 | 2.182185000  |
| O | -3.612019000 | 1.295608000  | 2.157292000  |

|    |              |              |              |
|----|--------------|--------------|--------------|
| O  | -3.585221000 | 1.278058000  | -0.683951000 |
| O  | -3.608021000 | -1.500940000 | 2.092269000  |
| O  | -2.048728000 | -2.655175000 | 3.234862000  |
| O  | 0.035507000  | -4.085911000 | 1.912984000  |
| O  | 2.076190000  | -2.828704000 | 2.996708000  |
| O  | 2.088878000  | -2.744817000 | -1.635083000 |
| O  | 3.633099000  | -1.538213000 | 2.007518000  |
| O  | 3.602776000  | -1.365223000 | -0.748078000 |
| O  | 3.647586000  | 1.265230000  | 2.119880000  |
| O  | 3.599952000  | 1.423221000  | -0.576861000 |
| O  | 2.001522000  | 2.632632000  | -1.561926000 |
| O  | 2.095626000  | 2.456648000  | 3.234467000  |
| O  | 1.062337000  | 1.387008000  | 0.738604000  |
| O  | 1.412324000  | -0.122156000 | 2.790596000  |
| O  | 0.034071000  | -1.512722000 | 4.576889000  |
| O  | -0.026265000 | 1.092981000  | 4.721728000  |
| O  | 1.066627000  | -1.536166000 | 0.697863000  |
| O  | -1.379503000 | -2.150611000 | 0.691254000  |
| O  | -2.031366000 | -2.426387000 | -1.942483000 |
| O  | -0.045424000 | -3.985497000 | -0.698661000 |
| O  | -3.594841000 | -1.472664000 | -0.655865000 |
| O  | -0.014576000 | 3.775971000  | 2.153759000  |
| O  | 0.024025000  | 3.937819000  | -0.456330000 |
| O  | -1.387952000 | 1.985649000  | 0.761061000  |
| O  | -2.046796000 | 2.253525000  | 3.458979000  |
| O  | -2.059598000 | 2.507931000  | -1.756069000 |
| O  | 1.343808000  | -0.040791000 | -1.416110000 |
| O  | -1.073923000 | -0.070758000 | -0.796092000 |
| H  | 1.946943000  | -0.033169000 | -2.185094000 |
| O  | -0.015499000 | 1.866880000  | -3.228210000 |
| H  | -0.861407000 | 2.246059000  | -3.519123000 |
| Hf | 2.534408000  | -0.071712000 | 0.693468000  |
| Hf | -0.012802000 | -1.866475000 | 2.504947000  |
| Hf | 0.032796000  | 1.707821000  | 2.514193000  |
| Hf | -0.026322000 | 1.705257000  | -1.050884000 |
| Hf | -2.526278000 | -0.087225000 | 0.705809000  |
| N  | -2.784117000 | -3.957204000 | -3.982861000 |
| H  | -2.025460000 | -3.790155000 | -3.331944000 |
| H  | -2.685204000 | -4.667057000 | -4.692428000 |
| N  | 2.763364000  | -4.174899000 | -3.797711000 |
| H  | 2.650376000  | -4.969674000 | -4.409193000 |
| H  | 2.016429000  | -3.925660000 | -3.158308000 |
| N  | 2.676977000  | 4.050185000  | -3.715737000 |
| H  | 1.961370000  | 3.395423000  | -3.412135000 |
| H  | 2.611495000  | 4.384140000  | -4.667054000 |
| N  | -2.894326000 | 4.794038000  | -2.931717000 |

|    |              |              |              |
|----|--------------|--------------|--------------|
| H  | -2.795684000 | 5.510778000  | -3.635636000 |
| H  | -2.101232000 | 4.189365000  | -2.756266000 |
| Hf | 0.029172000  | -1.897550000 | -1.067735000 |
| C  | -0.499917000 | -0.251115000 | -4.719918000 |
| C  | 0.516978000  | -1.097609000 | -4.249593000 |
| C  | 1.922994000  | -0.930360000 | -4.766525000 |
| H  | 2.302103000  | -1.931933000 | -5.028791000 |
| H  | -0.428297000 | 0.155032000  | -5.737653000 |
| H  | 1.913690000  | -0.314576000 | -5.682531000 |
| H  | 3.619935000  | -0.710880000 | -3.785818000 |
| H  | -1.781705000 | -1.235339000 | -3.676518000 |
| H  | -0.062679000 | 0.765396000  | -4.010627000 |
| O  | 2.735129000  | -0.321971000 | -3.773886000 |
| O  | 0.269889000  | -1.880749000 | -3.281006000 |
| O  | -1.787449000 | -0.498381000 | -4.316436000 |
| C  | -3.286951000 | 1.283355000  | -5.348403000 |
| C  | -4.476035000 | 0.658893000  | -4.675109000 |
| C  | -5.725264000 | 1.512588000  | -4.902183000 |
| H  | -2.998412000 | 0.776328000  | -6.308200000 |
| H  | -6.797738000 | 1.082115000  | -3.366576000 |
| H  | -5.927958000 | 1.569725000  | -5.983669000 |
| H  | -5.560176000 | 2.541436000  | -4.535228000 |
| H  | -5.523244000 | -0.931836000 | -4.858532000 |
| H  | -4.260403000 | 0.644534000  | -3.582334000 |
| O  | -2.715765000 | 2.271610000  | -4.947944000 |
| O  | -6.844394000 | 0.898200000  | -4.314374000 |
| O  | -4.665348000 | -0.626487000 | -5.190564000 |

Hf-NU-1000 (-NH<sub>2</sub>) Prod

|   |              |              |              |
|---|--------------|--------------|--------------|
| C | -3.248231000 | -2.182834000 | -1.650024000 |
| C | -3.229707000 | -2.386619000 | 2.899993000  |
| C | -3.232311000 | 2.034297000  | 3.104036000  |
| C | 3.276909000  | 2.141996000  | 2.939211000  |
| C | 3.226880000  | 2.366317000  | -1.338676000 |
| C | 3.259265000  | -2.277860000 | -1.561520000 |
| C | -3.265214000 | 2.236112000  | -1.457405000 |
| C | 3.257208000  | -2.506609000 | 2.716385000  |
| H | 4.084977000  | 2.707011000  | 3.452864000  |
| H | 4.061663000  | -3.139099000 | 3.153079000  |
| H | -4.032056000 | 2.552901000  | 3.677108000  |
| H | -4.030565000 | -2.970116000 | 3.403901000  |
| C | 5.660021000  | -2.602798000 | -2.068588000 |
| C | -5.580621000 | -2.527041000 | -2.394996000 |
| C | 4.321983000  | -2.885787000 | -2.395637000 |
| C | -4.249076000 | -2.971750000 | -2.385279000 |
| C | 4.048008000  | -3.726847000 | -3.511184000 |

|   |              |              |              |
|---|--------------|--------------|--------------|
| C | -3.889066000 | -4.144851000 | -3.106411000 |
| C | 5.139321000  | -4.249026000 | -4.234628000 |
| C | -4.901790000 | -4.791004000 | -3.847268000 |
| C | 6.447241000  | -3.958182000 | -3.881683000 |
| C | -6.198441000 | -4.306037000 | -3.876447000 |
| C | 6.720385000  | -3.126607000 | -2.790489000 |
| C | -6.555706000 | -3.165858000 | -3.144513000 |
| C | 5.589733000  | 3.023448000  | -1.655059000 |
| C | -5.649410000 | 2.887549000  | -1.600987000 |
| C | 4.250778000  | 3.134559000  | -2.068477000 |
| C | -4.336773000 | 3.034070000  | -2.089433000 |
| C | 3.929129000  | 3.950427000  | -3.193465000 |
| C | -4.092997000 | 3.929080000  | -3.173738000 |
| C | 4.992716000  | 4.625111000  | -3.834895000 |
| C | -5.203738000 | 4.601935000  | -3.733339000 |
| C | 6.299103000  | 4.510185000  | -3.392803000 |
| C | -6.484700000 | 4.421659000  | -3.240329000 |
| C | 6.613915000  | 3.705545000  | -2.290711000 |
| C | -6.721920000 | 3.562876000  | -2.158250000 |
| H | 5.835288000  | -1.947691000 | -1.213623000 |
| H | -5.816404000 | -1.638953000 | -1.804843000 |
| H | 4.934552000  | -4.894280000 | -5.093737000 |
| H | -4.641418000 | -5.687984000 | -4.415628000 |
| H | 7.749144000  | -2.892998000 | -2.512098000 |
| H | -7.580599000 | -2.791013000 | -3.160299000 |
| H | 5.793608000  | 2.374724000  | -0.800874000 |
| H | -5.795538000 | 2.209959000  | -0.756897000 |
| H | 4.762173000  | 5.251108000  | -4.701495000 |
| H | -5.031357000 | 5.276409000  | -4.576666000 |
| H | 7.644288000  | 3.613058000  | -1.943580000 |
| H | -7.729495000 | 3.430170000  | -1.761258000 |
| H | -6.948936000 | -4.829145000 | -4.474557000 |
| H | 7.265740000  | -4.385125000 | -4.466723000 |
| H | -7.314516000 | 4.961073000  | -3.704059000 |
| H | 7.088635000  | 5.053589000  | -3.918448000 |
| H | -1.962246000 | -2.908560000 | 0.587055000  |
| H | -0.879688000 | 1.353666000  | 5.096366000  |
| H | -0.015692000 | 0.055653000  | 4.790451000  |
| H | 0.013171000  | 4.022485000  | 0.601424000  |
| H | 0.665839000  | 4.289197000  | 2.656209000  |
| H | 0.853051000  | 4.341295000  | -0.708750000 |
| H | 1.957950000  | -0.196405000 | 3.574084000  |
| H | -1.941427000 | 2.799169000  | 0.830376000  |
| H | -0.597475000 | -2.029072000 | 5.092391000  |
| H | 0.907466000  | -4.423540000 | 2.046860000  |
| H | 0.724936000  | -4.364704000 | -1.145653000 |

|    |              |              |              |
|----|--------------|--------------|--------------|
| H  | -0.023938000 | -4.128439000 | 0.800393000  |
| O  | -1.067004000 | -0.099790000 | 2.177573000  |
| O  | -3.617970000 | 1.288602000  | 2.165096000  |
| O  | -3.615018000 | 1.352883000  | -0.614798000 |
| O  | -3.609588000 | -1.509618000 | 2.082394000  |
| O  | -2.045937000 | -2.670294000 | 3.214318000  |
| O  | 0.034776000  | -4.080019000 | 1.809897000  |
| O  | 2.072099000  | -2.851171000 | 2.962084000  |
| O  | 2.047483000  | -2.610220000 | -1.784739000 |
| O  | 3.633130000  | -1.523043000 | 2.031947000  |
| O  | 3.601590000  | -1.439520000 | -0.680735000 |
| O  | 3.646587000  | 1.268258000  | 2.117431000  |
| O  | 3.598536000  | 1.419035000  | -0.578519000 |
| O  | 2.006084000  | 2.668519000  | -1.525354000 |
| O  | 2.096416000  | 2.444952000  | 3.249175000  |
| O  | 1.061837000  | 1.397910000  | 0.757299000  |
| O  | 1.405075000  | -0.133851000 | 2.785381000  |
| O  | 0.039045000  | -1.538058000 | 4.561279000  |
| O  | -0.031800000 | 1.072722000  | 4.725941000  |
| O  | 1.055779000  | -1.549717000 | 0.685612000  |
| O  | -1.405280000 | -2.124095000 | 0.656384000  |
| O  | -2.025062000 | -2.352067000 | -1.959211000 |
| O  | -0.083654000 | -3.932012000 | -0.849537000 |
| O  | -3.636390000 | -1.375441000 | -0.748097000 |
| O  | -0.010547000 | 3.782493000  | 2.193141000  |
| O  | 0.009374000  | 3.967395000  | -0.416324000 |
| O  | -1.392552000 | 2.006954000  | 0.779791000  |
| O  | -2.048730000 | 2.246916000  | 3.463398000  |
| O  | -2.058668000 | 2.464551000  | -1.778971000 |
| O  | 1.383774000  | -0.016374000 | -1.336282000 |
| O  | -1.086548000 | -0.018111000 | -0.793951000 |
| H  | 1.897601000  | -0.015415000 | -2.168822000 |
| O  | 0.144330000  | 1.821265000  | -3.151270000 |
| H  | -0.622429000 | 1.599396000  | -3.700725000 |
| Hf | 2.531109000  | -0.062079000 | 0.696275000  |
| Hf | -0.022773000 | -1.867963000 | 2.487202000  |
| Hf | 0.032757000  | 1.707894000  | 2.519321000  |
| Hf | -0.015416000 | 1.755435000  | -1.058709000 |
| Hf | -2.537584000 | -0.061592000 | 0.701411000  |
| N  | -2.615830000 | -4.662908000 | -3.121288000 |
| H  | -1.964595000 | -4.383133000 | -2.390575000 |
| H  | -2.542553000 | -5.626144000 | -3.421314000 |
| N  | 2.766788000  | -4.006823000 | -3.945320000 |
| H  | 2.675434000  | -4.842748000 | -4.508584000 |
| H  | 2.043029000  | -3.865043000 | -3.247492000 |
| N  | 2.657442000  | 4.121875000  | -3.671217000 |



|    |              |              |              |
|----|--------------|--------------|--------------|
| H  | 1.935246000  | 3.473471000  | -3.370808000 |
| H  | 2.583049000  | 4.454635000  | -4.622295000 |
| N  | -2.857018000 | 4.104882000  | -3.720504000 |
| H  | -2.731122000 | 4.863312000  | -4.374430000 |
| H  | -2.053740000 | 3.769210000  | -3.200540000 |
| Hf | 0.012180000  | -1.804529000 | -1.081803000 |
| C  | -0.036875000 | -2.369684000 | -5.550723000 |
| C  | 0.565517000  | -1.465246000 | -4.512420000 |
| C  | 1.687093000  | -0.555705000 | -4.920557000 |
| H  | 2.508418000  | -1.228542000 | -5.239031000 |
| H  | 0.687837000  | -3.210371000 | -5.645576000 |
| H  | 1.357743000  | -0.040625000 | -5.846285000 |
| H  | 1.402399000  | 0.970712000  | -3.754919000 |
| H  | -1.433453000 | -2.957160000 | -4.307781000 |
| H  | -0.042774000 | -1.870917000 | -6.533033000 |
| O  | 2.145066000  | 0.314528000  | -3.952820000 |
| O  | 0.157939000  | -1.565851000 | -3.357661000 |
| O  | -1.325417000 | -2.785638000 | -5.262628000 |
| C  | -2.256717000 | -0.282937000 | -5.695435000 |
| C  | -3.416144000 | -0.470621000 | -4.766084000 |
| C  | -4.254314000 | 0.814812000  | -4.729590000 |
| H  | -2.377332000 | -0.773299000 | -6.694883000 |
| H  | -5.347843000 | 0.968038000  | -3.136390000 |
| H  | -4.528023000 | 1.093079000  | -5.763053000 |
| H  | -3.652294000 | 1.641729000  | -4.317284000 |
| H  | -5.034254000 | -1.498769000 | -4.751564000 |
| H  | -2.989432000 | -0.635992000 | -3.748987000 |
| O  | -1.282292000 | 0.394791000  | -5.433465000 |
| O  | -5.440679000 | 0.586241000  | -4.017011000 |
| O  | -4.183648000 | -1.543727000 | -5.215847000 |

## 4.2 -F

## Hf-NU-1000 (-F)

|   |              |              |              |
|---|--------------|--------------|--------------|
| C | -3.248200000 | -2.182800000 | -1.650100000 |
| C | -3.229700000 | -2.386600000 | 2.900000000  |
| C | -3.232300000 | 2.034300000  | 3.104000000  |
| C | 3.276900000  | 2.142000000  | 2.939200000  |
| C | 3.226900000  | 2.366300000  | -1.338700000 |
| C | 3.259300000  | -2.277900000 | -1.561500000 |
| C | -3.265300000 | 2.236100000  | -1.457300000 |
| C | 3.257200000  | -2.506600000 | 2.716400000  |
| H | 4.088842000  | 2.677629000  | 3.477165000  |
| H | 4.064409000  | -3.151431000 | 3.128934000  |
| H | -4.030895000 | 2.539887000  | 3.690744000  |
| H | -4.029640000 | -2.992335000 | 3.378983000  |

|   |              |              |              |
|---|--------------|--------------|--------------|
| C | 5.648405000  | -2.553618000 | -2.222722000 |
| C | -5.653063000 | -2.651120000 | -2.101289000 |
| C | 4.331078000  | -3.037395000 | -2.259535000 |
| C | -4.306440000 | -2.867836000 | -2.438077000 |
| C | 4.100235000  | -4.231980000 | -2.959108000 |
| C | -4.041234000 | -3.732043000 | -3.513307000 |
| C | 5.126903000  | -4.907856000 | -3.610108000 |
| C | -5.067818000 | -4.351763000 | -4.220442000 |
| C | 6.418517000  | -4.391493000 | -3.573072000 |
| C | -6.390851000 | -4.116240000 | -3.861926000 |
| C | 6.683178000  | -3.211313000 | -2.875700000 |
| C | -6.687324000 | -3.262307000 | -2.797805000 |
| C | 5.610804000  | 2.793864000  | -1.966021000 |
| C | -5.640924000 | 3.001622000  | -1.552680000 |
| C | 4.296094000  | 3.268712000  | -1.850270000 |
| C | -4.359307000 | 2.995038000  | -2.124409000 |
| C | 4.054520000  | 4.597448000  | -2.227242000 |
| C | -4.176222000 | 3.718125000  | -3.312813000 |
| C | 5.064814000  | 5.416482000  | -2.718199000 |
| C | -5.216074000 | 4.430737000  | -3.901385000 |
| C | 6.354643000  | 4.908582000  | -2.844654000 |
| C | -6.470885000 | 4.435009000  | -3.299709000 |
| C | 6.631417000  | 3.594076000  | -2.465521000 |
| C | -6.686975000 | 3.717804000  | -2.121656000 |
| H | 5.829035000  | -1.634464000 | -1.662472000 |
| H | -5.856268000 | -1.978594000 | -1.266383000 |
| H | 4.892317000  | -5.835635000 | -4.133800000 |
| H | -4.804022000 | -5.013019000 | -5.047074000 |
| H | 7.696760000  | -2.808322000 | -2.840151000 |
| H | -7.724342000 | -3.074383000 | -2.514174000 |
| H | 5.801616000  | 1.766233000  | -1.651513000 |
| H | -5.784217000 | 2.426400000  | -0.635949000 |
| H | 4.821008000  | 6.444652000  | -2.989226000 |
| H | -5.020641000 | 4.968746000  | -4.830111000 |
| H | 7.643934000  | 3.196907000  | -2.556641000 |
| H | -7.671560000 | 3.716053000  | -1.650654000 |
| H | -7.194002000 | -4.603727000 | -4.419222000 |
| H | 7.223440000  | -4.920155000 | -4.088399000 |
| H | -7.285474000 | 4.998901000  | -3.759744000 |
| H | 7.148377000  | 5.549090000  | -3.235339000 |
| H | -1.916823000 | -2.957047000 | 0.619171000  |
| H | -0.871856000 | 1.409405000  | 5.063038000  |
| H | -0.010529000 | 0.105693000  | 4.789049000  |
| H | 0.056210000  | 4.022334000  | 0.537226000  |
| H | 0.662584000  | 4.303129000  | 2.636873000  |
| H | 0.849152000  | 4.346427000  | -0.806159000 |

|    |              |              |              |
|----|--------------|--------------|--------------|
| H  | 1.965207000  | -0.170467000 | 3.574339000  |
| H  | -1.918691000 | 2.805901000  | 0.826747000  |
| H  | -0.607487000 | -1.982774000 | 5.125128000  |
| H  | 0.898336000  | -4.443158000 | 2.200887000  |
| H  | 0.653352000  | -4.445359000 | -1.201029000 |
| H  | 0.050910000  | -4.156666000 | 0.890060000  |
| O  | -1.061044000 | -0.099841000 | 2.186020000  |
| O  | -3.621500000 | 1.288613000  | 2.166768000  |
| O  | -3.620575000 | 1.353382000  | -0.614013000 |
| O  | -3.608866000 | -1.506666000 | 2.087595000  |
| O  | -2.048371000 | -2.649393000 | 3.242136000  |
| O  | 0.052484000  | -4.078688000 | 1.905728000  |
| O  | 2.076520000  | -2.825214000 | 3.004504000  |
| O  | 2.049414000  | -2.531324000 | -1.859471000 |
| O  | 3.629363000  | -1.532049000 | 2.013864000  |
| O  | 3.621005000  | -1.416288000 | -0.713304000 |
| O  | 3.646484000  | 1.290410000  | 2.087781000  |
| O  | 3.607118000  | 1.337752000  | -0.690683000 |
| O  | 2.032132000  | 2.663065000  | -1.567332000 |
| O  | 2.099586000  | 2.449438000  | 3.241862000  |
| O  | 1.082660000  | 1.383171000  | 0.716242000  |
| O  | 1.414401000  | -0.121164000 | 2.783245000  |
| O  | 0.036718000  | -1.508109000 | 4.588327000  |
| O  | -0.022008000 | 1.117823000  | 4.704549000  |
| O  | 1.076160000  | -1.547193000 | 0.699652000  |
| O  | -1.383413000 | -2.156131000 | 0.698195000  |
| O  | -2.030042000 | -2.351606000 | -1.966791000 |
| O  | 0.011941000  | -3.927313000 | -0.700528000 |
| O  | -3.627291000 | -1.447288000 | -0.686378000 |
| O  | 0.008790000  | 3.782974000  | 2.157182000  |
| O  | 0.031106000  | 3.950447000  | -0.472141000 |
| O  | -1.385516000 | 2.003309000  | 0.769618000  |
| O  | -2.046519000 | 2.258785000  | 3.448067000  |
| O  | -2.077678000 | 2.508817000  | -1.756496000 |
| O  | 1.320680000  | -0.049831000 | -1.433039000 |
| O  | -1.084055000 | -0.052535000 | -0.749211000 |
| H  | 1.852903000  | 0.029081000  | -2.234887000 |
| O  | 0.030983000  | 1.625120000  | -3.141057000 |
| H  | -0.698604000 | 1.959952000  | -3.672455000 |
| Hf | 2.539575000  | -0.053515000 | 0.686324000  |
| Hf | -0.017402000 | -1.861195000 | 2.526836000  |
| Hf | 0.043389000  | 1.714778000  | 2.481536000  |
| Hf | -0.048585000 | 1.743706000  | -1.123997000 |
| Hf | -2.537671000 | -0.063029000 | 0.715654000  |
| Hf | 0.016474000  | -1.852826000 | -1.006965000 |
| F  | -2.999575000 | 3.718258000  | -3.939333000 |

|   |              |              |              |
|---|--------------|--------------|--------------|
| F | 2.838279000  | 5.138332000  | -2.088491000 |
| F | -2.795450000 | -3.992333000 | -3.898615000 |
| F | 2.884718000  | -4.781035000 | -2.996553000 |

## Hf-NU-1000 (-F) Ads

|   |              |              |              |
|---|--------------|--------------|--------------|
| C | -3.248200000 | -2.182800000 | -1.650100000 |
| C | -3.229700000 | -2.386600000 | 2.900000000  |
| C | -3.232300000 | 2.034300000  | 3.104000000  |
| C | 3.276900000  | 2.142000000  | 2.939200000  |
| C | 3.226900000  | 2.366300000  | -1.338700000 |
| C | 3.259300000  | -2.277900000 | -1.561500000 |
| C | -3.265300000 | 2.236100000  | -1.457300000 |
| C | 3.257200000  | -2.506600000 | 2.716400000  |
| H | 4.089776000  | 2.705154000  | 3.447964000  |
| H | 4.063114000  | -3.136729000 | 3.153907000  |
| H | -4.033242000 | 2.563451000  | 3.666255000  |
| H | -4.033858000 | -2.966086000 | 3.403903000  |
| C | 5.686875000  | -2.665334000 | -1.991127000 |
| C | -5.538831000 | -2.052297000 | -2.633413000 |
| C | 4.352644000  | -2.996816000 | -2.279877000 |
| C | -4.326471000 | -2.748001000 | -2.511245000 |
| C | 4.136237000  | -3.997963000 | -3.240247000 |
| C | -4.173081000 | -3.917444000 | -3.266906000 |
| C | 5.190413000  | -4.639122000 | -3.883639000 |
| C | -5.161295000 | -4.375399000 | -4.128339000 |
| C | 6.499937000  | -4.284858000 | -3.575729000 |
| C | -6.345744000 | -3.652999000 | -4.244112000 |
| C | 6.750884000  | -3.293544000 | -2.625433000 |
| C | -6.538246000 | -2.490875000 | -3.494185000 |
| C | 5.547144000  | 2.672798000  | -2.215334000 |
| C | -5.678067000 | 2.691598000  | -1.903186000 |
| C | 4.283008000  | 3.219032000  | -1.952487000 |
| C | -4.334027000 | 2.893567000  | -2.255999000 |
| C | 4.074693000  | 4.562014000  | -2.291473000 |
| C | -4.072559000 | 3.692558000  | -3.381370000 |
| C | 5.068652000  | 5.333832000  | -2.881236000 |
| C | -5.102129000 | 4.264688000  | -4.122508000 |
| C | 6.306731000  | 4.757472000  | -3.152684000 |
| C | -6.423157000 | 4.053287000  | -3.742136000 |
| C | 6.548937000  | 3.423939000  | -2.819235000 |
| C | -6.715515000 | 3.264931000  | -2.627126000 |
| H | 5.856304000  | -1.890916000 | -1.241349000 |
| H | -5.659133000 | -1.143036000 | -2.039908000 |
| H | 4.960277000  | -5.411487000 | -4.618984000 |
| H | -4.979361000 | -5.287049000 | -4.698430000 |
| H | 7.776626000  | -3.013604000 | -2.379211000 |

|   |              |              |              |
|---|--------------|--------------|--------------|
| H | -7.467935000 | -1.926335000 | -3.584462000 |
| H | 5.711857000  | 1.630046000  | -1.936829000 |
| H | -5.876722000 | 2.065452000  | -1.031258000 |
| H | 4.855389000  | 6.378162000  | -3.113631000 |
| H | -4.842945000 | 4.868372000  | -4.993267000 |
| H | 7.520743000  | 2.972928000  | -3.027640000 |
| H | -7.751442000 | 3.098498000  | -2.326148000 |
| H | -7.124039000 | -4.004088000 | -4.925198000 |
| H | 7.327024000  | -4.788546000 | -4.081072000 |
| H | -7.228976000 | 4.506750000  | -4.323819000 |
| H | 7.087955000  | 5.359396000  | -3.622103000 |
| H | -1.911492000 | -2.940338000 | 0.585160000  |
| H | -0.883210000 | 1.316742000  | 5.109056000  |
| H | -0.014235000 | 0.020950000  | 4.788435000  |
| H | 0.063845000  | 4.030030000  | 0.637523000  |
| H | 0.669056000  | 4.279081000  | 2.712564000  |
| H | 0.887270000  | 4.357718000  | -0.690799000 |
| H | 1.968987000  | -0.212488000 | 3.567645000  |
| H | -1.923772000 | 2.801535000  | 0.840555000  |
| H | -0.609518000 | -2.042478000 | 5.065636000  |
| H | 0.880717000  | -4.466497000 | 2.178604000  |
| H | 0.633246000  | -4.434141000 | -1.229391000 |
| H | 0.059173000  | -4.155114000 | 0.846213000  |
| O | -1.057244000 | -0.105223000 | 2.186941000  |
| O | -3.614171000 | 1.286277000  | 2.167069000  |
| O | -3.630480000 | 1.378351000  | -0.595558000 |
| O | -3.607603000 | -1.511519000 | 2.077088000  |
| O | -2.048246000 | -2.667763000 | 3.217108000  |
| O | 0.042941000  | -4.092547000 | 1.873750000  |
| O | 2.075351000  | -2.843231000 | 2.973230000  |
| O | 2.062377000  | -2.538739000 | -1.861665000 |
| O | 3.633575000  | -1.530261000 | 2.018800000  |
| O | 3.620191000  | -1.429551000 | -0.696202000 |
| O | 3.639781000  | 1.288595000  | 2.092056000  |
| O | 3.616901000  | 1.381129000  | -0.646365000 |
| O | 2.022854000  | 2.671361000  | -1.554684000 |
| O | 2.100756000  | 2.427498000  | 3.279255000  |
| O | 1.079874000  | 1.415293000  | 0.772238000  |
| O | 1.413587000  | -0.141795000 | 2.781508000  |
| O | 0.041577000  | -1.554502000 | 4.549458000  |
| O | -0.032834000 | 1.042747000  | 4.738862000  |
| O | 1.064211000  | -1.538975000 | 0.660048000  |
| O | -1.380766000 | -2.137323000 | 0.655281000  |
| O | -2.056880000 | -2.482723000 | -1.921731000 |
| O | 0.020160000  | -3.926429000 | -0.683875000 |
| O | -3.611459000 | -1.392015000 | -0.731493000 |

|    |              |              |              |
|----|--------------|--------------|--------------|
| O  | 0.002658000  | 3.774210000  | 2.233466000  |
| O  | 0.059077000  | 3.966046000  | -0.377453000 |
| O  | -1.377853000 | 2.006246000  | 0.809674000  |
| O  | -2.050333000 | 2.236119000  | 3.478005000  |
| O  | -2.062828000 | 2.531972000  | -1.701063000 |
| O  | 1.383020000  | 0.015256000  | -1.336319000 |
| O  | -1.081600000 | -0.030265000 | -0.776468000 |
| H  | 1.898680000  | 0.034204000  | -2.167512000 |
| O  | -0.031041000 | 1.586242000  | -3.140888000 |
| H  | -0.809616000 | 2.043070000  | -3.491115000 |
| Hf | 2.525080000  | -0.071430000 | 0.686429000  |
| Hf | -0.007322000 | -1.885584000 | 2.469368000  |
| Hf | 0.040224000  | 1.698165000  | 2.546518000  |
| Hf | -0.018468000 | 1.758818000  | -1.007881000 |
| Hf | -2.518811000 | -0.066916000 | 0.719909000  |
| Hf | 0.023843000  | -1.859062000 | -1.131680000 |
| F  | -2.827289000 | 3.924650000  | -3.789735000 |
| F  | 2.908120000  | 5.160972000  | -2.014997000 |
| F  | -3.049535000 | -4.645225000 | -3.166242000 |
| F  | 2.900873000  | -4.376270000 | -3.574051000 |
| C  | -1.677763000 | -2.576917000 | -5.143963000 |
| C  | -0.230648000 | -2.800734000 | -4.675270000 |
| C  | 0.291145000  | -1.372232000 | -4.518263000 |
| C  | -1.696529000 | -1.142410000 | -5.685026000 |
| C  | 1.790894000  | -1.133910000 | -4.658164000 |
| C  | -2.665046000 | -0.218031000 | -4.964837000 |
| H  | 2.325499000  | -1.978898000 | -4.207145000 |
| H  | 0.343120000  | -3.309609000 | -5.475601000 |
| H  | -2.317035000 | -2.619860000 | -4.252240000 |
| H  | -1.522598000 | 1.249423000  | -5.401901000 |
| H  | 2.034940000  | -1.114520000 | -5.734749000 |
| H  | 1.596902000  | 0.763675000  | -4.147024000 |
| H  | -2.546157000 | -0.350633000 | -3.868299000 |
| H  | -3.699962000 | -0.509737000 | -5.208471000 |
| H  | -0.985882000 | -3.782260000 | -3.166058000 |
| H  | -0.175798000 | 0.074634000  | -3.229336000 |
| H  | -1.646991000 | -3.554008000 | -6.814374000 |
| H  | -1.908242000 | -1.127825000 | -6.767546000 |
| O  | -2.181735000 | -3.555493000 | -6.011356000 |
| O  | 2.226702000  | 0.032001000  | -3.999222000 |
| O  | -2.479961000 | 1.116536000  | -5.349969000 |
| O  | -0.172637000 | -0.953013000 | -3.254375000 |
| O  | -0.102272000 | -3.517709000 | -3.474163000 |
| O  | -0.357386000 | -0.638291000 | -5.529083000 |

Hf-NU-1000 (-F) TS1

|   |              |              |              |
|---|--------------|--------------|--------------|
| C | -3.248200000 | -2.182800000 | -1.650100000 |
| C | -3.229700000 | -2.386600000 | 2.900000000  |
| C | -3.232300000 | 2.034300000  | 3.104000000  |
| C | 3.276900000  | 2.142000000  | 2.939200000  |
| C | 3.226900000  | 2.366300000  | -1.338700000 |
| C | 3.259300000  | -2.277900000 | -1.561500000 |
| C | -3.265300000 | 2.236100000  | -1.457300000 |
| C | 3.257200000  | -2.506600000 | 2.716400000  |
| H | 4.089348000  | 2.710000000  | 3.443404000  |
| H | 4.062620000  | -3.132223000 | 3.161078000  |
| H | -4.032753000 | 2.567154000  | 3.663421000  |
| H | -4.033290000 | -2.962452000 | 3.409008000  |
| C | 5.682544000  | -2.609191000 | -2.060462000 |
| C | -5.570398000 | -2.150090000 | -2.570656000 |
| C | 4.351073000  | -2.999002000 | -2.279888000 |
| C | -4.325871000 | -2.792062000 | -2.481685000 |
| C | 4.133726000  | -4.056884000 | -3.176787000 |
| C | -4.148063000 | -3.962128000 | -3.231210000 |
| C | 5.184593000  | -4.696677000 | -3.826978000 |
| C | -5.145132000 | -4.473177000 | -4.051644000 |
| C | 6.491342000  | -4.281706000 | -3.591499000 |
| C | -6.362987000 | -3.803933000 | -4.133783000 |
| C | 6.743033000  | -3.233308000 | -2.704789000 |
| C | -6.578931000 | -2.641247000 | -3.391249000 |
| C | 5.543098000  | 2.679168000  | -2.222340000 |
| C | -5.677318000 | 2.648012000  | -1.940167000 |
| C | 4.279041000  | 3.222786000  | -1.953957000 |
| C | -4.331728000 | 2.893675000  | -2.258661000 |
| C | 4.067256000  | 4.566321000  | -2.287868000 |
| C | -4.067852000 | 3.732835000  | -3.354347000 |
| C | 5.057726000  | 5.341785000  | -2.878532000 |
| C | -5.097564000 | 4.300306000  | -4.099635000 |
| C | 6.295706000  | 4.767997000  | -3.156187000 |
| C | -6.420066000 | 4.042856000  | -3.754806000 |
| C | 6.541345000  | 3.433820000  | -2.827783000 |
| C | -6.714452000 | 3.214473000  | -2.669698000 |
| H | 5.852697000  | -1.791600000 | -1.358225000 |
| H | -5.710635000 | -1.241748000 | -1.980385000 |
| H | 4.954210000  | -5.516104000 | -4.509397000 |
| H | -4.944959000 | -5.384535000 | -4.616066000 |
| H | 7.766883000  | -2.906132000 | -2.515317000 |
| H | -7.534876000 | -2.118430000 | -3.454701000 |
| H | 5.710435000  | 1.635842000  | -1.947234000 |
| H | -5.877130000 | 1.991881000  | -1.090900000 |
| H | 4.842304000  | 6.386636000  | -3.106522000 |
| H | -4.836434000 | 4.938034000  | -4.945218000 |

|   |              |              |              |
|---|--------------|--------------|--------------|
| H | 7.513168000  | 2.985167000  | -3.041045000 |
| H | -7.751561000 | 3.011922000  | -2.396260000 |
| H | -7.148812000 | -4.197306000 | -4.782303000 |
| H | 7.315987000  | -4.783393000 | -4.102809000 |
| H | -7.225423000 | 4.492349000  | -4.340229000 |
| H | 7.074362000  | 5.372591000  | -3.626405000 |
| H | -1.912971000 | -2.937765000 | 0.577708000  |
| H | -0.882981000 | 1.299677000  | 5.117353000  |
| H | -0.015313000 | 0.003789000  | 4.784934000  |
| H | 0.069367000  | 4.028454000  | 0.651864000  |
| H | 0.672559000  | 4.272075000  | 2.722015000  |
| H | 0.893610000  | 4.360828000  | -0.676893000 |
| H | 1.966717000  | -0.220585000 | 3.565936000  |
| H | -1.921198000 | 2.806156000  | 0.845499000  |
| H | -0.607834000 | -2.053854000 | 5.052290000  |
| H | 0.879436000  | -4.468959000 | 2.156205000  |
| H | 0.620207000  | -4.427075000 | -1.244785000 |
| H | 0.057573000  | -4.147579000 | 0.823285000  |
| O | -1.058478000 | -0.105863000 | 2.186112000  |
| O | -3.614146000 | 1.286377000  | 2.167357000  |
| O | -3.631219000 | 1.381978000  | -0.593310000 |
| O | -3.609597000 | -1.510402000 | 2.078657000  |
| O | -2.047725000 | -2.672302000 | 3.209287000  |
| O | 0.042133000  | -4.092122000 | 1.853933000  |
| O | 2.075049000  | -2.846815000 | 2.965113000  |
| O | 2.063375000  | -2.539416000 | -1.858513000 |
| O | 3.634964000  | -1.530798000 | 2.018327000  |
| O | 3.623509000  | -1.424860000 | -0.700857000 |
| O | 3.639122000  | 1.287551000  | 2.093559000  |
| O | 3.618583000  | 1.392928000  | -0.635145000 |
| O | 2.019440000  | 2.660368000  | -1.570734000 |
| O | 2.100619000  | 2.423893000  | 3.283870000  |
| O | 1.079518000  | 1.418093000  | 0.778356000  |
| O | 1.413115000  | -0.145663000 | 2.778901000  |
| O | 0.042651000  | -1.562379000 | 4.538687000  |
| O | -0.034129000 | 1.027849000  | 4.742315000  |
| O | 1.061890000  | -1.536595000 | 0.650885000  |
| O | -1.385856000 | -2.132200000 | 0.644942000  |
| O | -2.056101000 | -2.458184000 | -1.936713000 |
| O | 0.012144000  | -3.916646000 | -0.695942000 |
| O | -3.616266000 | -1.387649000 | -0.736062000 |
| O | 0.003872000  | 3.771079000  | 2.241907000  |
| O | 0.067226000  | 3.964878000  | -0.364505000 |
| O | -1.377377000 | 2.009348000  | 0.815776000  |
| O | -2.050593000 | 2.232499000  | 3.481742000  |
| O | -2.059241000 | 2.524948000  | -1.703057000 |



|    |              |              |              |
|----|--------------|--------------|--------------|
| O  | 1.394571000  | 0.024084000  | -1.325639000 |
| O  | -1.077586000 | -0.022747000 | -0.769085000 |
| H  | 1.903671000  | 0.027333000  | -2.160480000 |
| O  | -0.062967000 | 1.480559000  | -3.144587000 |
| H  | -0.887780000 | 1.849895000  | -3.500392000 |
| Hf | 2.524867000  | -0.078409000 | 0.687196000  |
| Hf | -0.007180000 | -1.889874000 | 2.454536000  |
| Hf | 0.038346000  | 1.693211000  | 2.556253000  |
| Hf | -0.014546000 | 1.757026000  | -0.986733000 |
| Hf | -2.520987000 | -0.069266000 | 0.720316000  |
| Hf | 0.020423000  | -1.849557000 | -1.162345000 |
| F  | -2.822614000 | 4.012854000  | -3.726447000 |
| F  | 2.900179000  | 5.161661000  | -2.004485000 |
| F  | -2.993219000 | -4.643967000 | -3.160484000 |
| F  | 2.900739000  | -4.495700000 | -3.436490000 |
| C  | -1.671693000 | -2.522291000 | -5.132705000 |
| C  | -0.232453000 | -2.797900000 | -4.667862000 |
| C  | 0.338181000  | -1.390677000 | -4.488837000 |
| C  | -1.634064000 | -1.084432000 | -5.668065000 |
| C  | 1.847089000  | -1.220825000 | -4.642201000 |
| C  | -2.553045000 | -0.119869000 | -4.933510000 |
| H  | 2.348357000  | -2.078449000 | -4.178387000 |
| H  | 0.318350000  | -3.315567000 | -5.479800000 |
| H  | -2.318025000 | -2.550773000 | -4.245651000 |
| H  | -1.311279000 | 1.240465000  | -5.447088000 |
| H  | 2.095588000  | -1.222557000 | -5.717636000 |
| H  | 1.779556000  | 0.698095000  | -4.238713000 |
| H  | -2.457949000 | -0.287915000 | -3.840701000 |
| H  | -3.602336000 | -0.330649000 | -5.198690000 |
| H  | -0.996075000 | -3.824353000 | -3.190645000 |
| H  | -0.114585000 | 0.207390000  | -3.233061000 |
| H  | -1.649250000 | -3.503112000 | -6.801279000 |
| H  | -1.858910000 | -1.059871000 | -6.748021000 |
| O  | -2.203377000 | -3.477285000 | -6.011931000 |
| O  | 2.331160000  | -0.063550000 | -3.994597000 |
| O  | -2.264152000 | 1.212842000  | -5.274409000 |
| O  | -0.103099000 | -0.939915000 | -3.249052000 |
| O  | -0.114928000 | -3.529339000 | -3.474469000 |
| O  | -0.275795000 | -0.639491000 | -5.527246000 |

## Hf-NU-1000 (-F) Int1

|   |              |              |              |
|---|--------------|--------------|--------------|
| C | -3.248200000 | -2.182800000 | -1.650100000 |
| C | -3.229700000 | -2.386600000 | 2.900000000  |
| C | -3.232300000 | 2.034300000  | 3.104000000  |
| C | 3.276900000  | 2.142000000  | 2.939200000  |
| C | 3.226900000  | 2.366300000  | -1.338700000 |

|   |              |              |              |
|---|--------------|--------------|--------------|
| C | 3.259300000  | -2.277900000 | -1.561500000 |
| C | -3.265300000 | 2.236100000  | -1.457300000 |
| C | 3.257200000  | -2.506600000 | 2.716400000  |
| H | 4.089620000  | 2.707805000  | 3.445496000  |
| H | 4.062580000  | -3.129056000 | 3.165224000  |
| H | -4.031644000 | 2.568593000  | 3.663476000  |
| H | -4.032672000 | -2.966193000 | 3.405606000  |
| C | 5.603622000  | -2.365838000 | -2.421656000 |
| C | -5.558489000 | -2.041176000 | -2.585905000 |
| C | 4.335212000  | -2.961064000 | -2.338353000 |
| C | -4.348562000 | -2.745469000 | -2.485162000 |
| C | 4.145152000  | -4.173358000 | -3.018478000 |
| C | -4.226369000 | -3.928048000 | -3.226150000 |
| C | 5.162989000  | -4.763155000 | -3.762195000 |
| C | -5.244383000 | -4.390929000 | -4.050359000 |
| C | 6.403551000  | -4.137616000 | -3.842687000 |
| C | -6.425054000 | -3.660864000 | -4.145230000 |
| C | 6.627515000  | -2.934722000 | -3.170022000 |
| C | -6.585589000 | -2.483911000 | -3.410733000 |
| C | 5.576146000  | 2.738004000  | -2.104967000 |
| C | -5.674864000 | 2.691321000  | -1.907361000 |
| C | 4.273249000  | 3.234172000  | -1.950371000 |
| C | -4.329433000 | 2.917773000  | -2.241233000 |
| C | 4.025980000  | 4.543918000  | -2.384334000 |
| C | -4.066354000 | 3.767907000  | -3.328762000 |
| C | 5.018163000  | 5.323524000  | -2.968101000 |
| C | -5.096642000 | 4.361238000  | -4.053251000 |
| C | 6.294875000  | 4.793728000  | -3.132096000 |
| C | -6.418596000 | 4.119795000  | -3.695156000 |
| C | 6.577823000  | 3.497661000  | -2.697584000 |
| C | -6.712052000 | 3.283099000  | -2.616235000 |
| H | 5.755063000  | -1.434544000 | -1.871784000 |
| H | -5.656968000 | -1.124011000 | -2.001232000 |
| H | 4.961962000  | -5.710972000 | -4.263675000 |
| H | -5.085745000 | -5.313391000 | -4.609773000 |
| H | 7.602695000  | -2.447326000 | -3.224213000 |
| H | -7.512564000 | -1.912311000 | -3.483599000 |
| H | 5.772918000  | 1.727447000  | -1.741456000 |
| H | -5.874605000 | 2.030581000  | -1.061835000 |
| H | 4.771576000  | 6.339451000  | -3.279852000 |
| H | -4.836058000 | 5.007288000  | -4.892704000 |
| H | 7.581190000  | 3.084669000  | -2.816021000 |
| H | -7.748541000 | 3.094051000  | -2.331154000 |
| H | -7.225599000 | -4.016396000 | -4.797682000 |
| H | 7.201423000  | -4.598816000 | -4.429018000 |
| H | -7.224092000 | 4.589340000  | -4.264399000 |

|   |              |              |              |
|---|--------------|--------------|--------------|
| H | 7.074185000  | 5.403197000  | -3.594824000 |
| H | -1.914641000 | -2.930082000 | 0.578480000  |
| H | -0.880675000 | 1.295719000  | 5.126568000  |
| H | -0.016832000 | -0.002935000 | 4.785367000  |
| H | 0.068305000  | 4.026218000  | 0.656781000  |
| H | 0.678106000  | 4.267124000  | 2.718820000  |
| H | 0.879324000  | 4.362746000  | -0.682267000 |
| H | 1.964692000  | -0.217556000 | 3.573793000  |
| H | -1.915815000 | 2.811445000  | 0.846940000  |
| H | -0.611391000 | -2.052538000 | 5.047322000  |
| H | 0.885805000  | -4.473827000 | 2.107329000  |
| H | 0.610283000  | -4.421145000 | -1.277975000 |
| H | 0.048817000  | -4.137961000 | 0.787240000  |
| O | -1.056314000 | -0.103231000 | 2.186198000  |
| O | -3.614954000 | 1.286683000  | 2.168116000  |
| O | -3.633906000 | 1.387517000  | -0.590349000 |
| O | -3.611328000 | -1.505186000 | 2.085028000  |
| O | -2.047331000 | -2.673095000 | 3.207139000  |
| O | 0.049644000  | -4.085189000 | 1.817870000  |
| O | 2.075379000  | -2.844444000 | 2.966415000  |
| O | 2.067916000  | -2.594666000 | -1.788585000 |
| O | 3.637139000  | -1.535758000 | 2.010744000  |
| O | 3.639171000  | -1.393891000 | -0.734557000 |
| O | 3.638799000  | 1.290273000  | 2.090504000  |
| O | 3.624522000  | 1.394856000  | -0.637843000 |
| O | 2.015282000  | 2.655270000  | -1.565675000 |
| O | 2.100766000  | 2.424216000  | 3.284104000  |
| O | 1.077487000  | 1.412208000  | 0.776357000  |
| O | 1.416366000  | -0.142610000 | 2.783081000  |
| O | 0.040954000  | -1.560825000 | 4.536234000  |
| O | -0.034532000 | 1.023328000  | 4.746014000  |
| O | 1.071276000  | -1.526350000 | 0.658141000  |
| O | -1.387696000 | -2.125013000 | 0.652177000  |
| O | -2.062856000 | -2.487695000 | -1.931522000 |
| O | -0.009185000 | -3.909450000 | -0.741881000 |
| O | -3.598453000 | -1.378985000 | -0.732844000 |
| O | 0.008282000  | 3.767523000  | 2.238744000  |
| O | 0.059568000  | 3.960424000  | -0.361201000 |
| O | -1.376296000 | 2.011537000  | 0.819220000  |
| O | -2.049945000 | 2.231850000  | 3.481887000  |
| O | -2.054579000 | 2.506488000  | -1.714405000 |
| O | 1.393344000  | 0.027476000  | -1.343448000 |
| O | -1.080780000 | -0.014749000 | -0.767770000 |
| H | 1.876924000  | -0.028302000 | -2.189680000 |
| O | -0.072794000 | 1.434757000  | -3.179532000 |
| H | -0.896141000 | 1.686761000  | -3.647717000 |

|    |              |              |              |
|----|--------------|--------------|--------------|
| Hf | 2.533412000  | -0.086160000 | 0.683982000  |
| Hf | -0.004337000 | -1.890339000 | 2.449747000  |
| Hf | 0.037619000  | 1.688488000  | 2.563820000  |
| Hf | -0.014589000 | 1.748886000  | -0.965934000 |
| Hf | -2.525747000 | -0.072917000 | 0.723711000  |
| Hf | 0.018067000  | -1.838126000 | -1.166975000 |
| F  | -2.822134000 | 4.036032000  | -3.711533000 |
| F  | 2.823445000  | 5.105717000  | -2.212733000 |
| F  | -3.111999000 | -4.663223000 | -3.142239000 |
| F  | 2.979557000  | -4.817022000 | -2.952691000 |
| C  | -1.742607000 | -2.561504000 | -5.159094000 |
| C  | -0.326967000 | -3.001044000 | -4.773258000 |
| C  | 0.367953000  | -1.664510000 | -4.459404000 |
| C  | -1.559715000 | -1.117170000 | -5.642885000 |
| C  | 1.877810000  | -1.696700000 | -4.640032000 |
| C  | -2.398754000 | -0.102981000 | -4.883633000 |
| H  | 2.246018000  | -2.637872000 | -4.197060000 |
| H  | 0.161085000  | -3.444627000 | -5.664875000 |
| H  | -2.350297000 | -2.554548000 | -4.244211000 |
| H  | -1.095885000 | 1.137016000  | -5.561188000 |
| H  | 2.110652000  | -1.700314000 | -5.718083000 |
| H  | 3.379664000  | -0.520861000 | -4.235572000 |
| H  | -2.309855000 | -0.301165000 | -3.796757000 |
| H  | -3.463428000 | -0.211370000 | -5.150506000 |
| H  | -1.028672000 | -3.842730000 | -3.171051000 |
| H  | 0.019447000  | 0.444903000  | -3.327203000 |
| H  | -1.863187000 | -3.539783000 | -6.823313000 |
| H  | -1.779413000 | -1.042272000 | -6.723255000 |
| O  | -2.420625000 | -3.411322000 | -6.046793000 |
| O  | 2.447877000  | -0.568176000 | -3.996277000 |
| O  | -1.981883000 | 1.219896000  | -5.174862000 |
| O  | 0.010442000  | -1.222032000 | -3.222410000 |
| O  | -0.239541000 | -3.925456000 | -3.732799000 |
| O  | -0.174565000 | -0.797114000 | -5.478594000 |

## Hf-NU-1000 (-F) TS2

|   |              |              |              |
|---|--------------|--------------|--------------|
| C | -3.248200000 | -2.182800000 | -1.650100000 |
| C | -3.229700000 | -2.386600000 | 2.900000000  |
| C | -3.232300000 | 2.034300000  | 3.104000000  |
| C | 3.276900000  | 2.142000000  | 2.939200000  |
| C | 3.226900000  | 2.366300000  | -1.338700000 |
| C | 3.259300000  | -2.277900000 | -1.561500000 |
| C | -3.265300000 | 2.236100000  | -1.457300000 |
| C | 3.257200000  | -2.506600000 | 2.716400000  |
| H | 4.090227000  | 2.686104000  | 3.467642000  |
| H | 4.064996000  | -3.144464000 | 3.139203000  |

|   |              |              |              |
|---|--------------|--------------|--------------|
| H | -4.031287000 | 2.550432000  | 3.680636000  |
| H | -4.031110000 | -2.986380000 | 3.384255000  |
| C | 5.598993000  | -2.263269000 | -2.447975000 |
| C | -5.605327000 | -2.058030000 | -2.464207000 |
| C | 4.332995000  | -2.870691000 | -2.417964000 |
| C | -4.340089000 | -2.662786000 | -2.547913000 |
| C | 4.141674000  | -3.998179000 | -3.232226000 |
| C | -4.169852000 | -3.657098000 | -3.521767000 |
| C | 5.154720000  | -4.493725000 | -4.048202000 |
| C | -5.195839000 | -4.031314000 | -4.381526000 |
| C | 6.393019000  | -3.859324000 | -4.067029000 |
| C | -6.433401000 | -3.405471000 | -4.280006000 |
| C | 6.618576000  | -2.739422000 | -3.264167000 |
| C | -6.641579000 | -2.415921000 | -3.316875000 |
| C | 5.610037000  | 2.784537000  | -1.974106000 |
| C | -5.675707000 | 2.628571000  | -1.956906000 |
| C | 4.291468000  | 3.256372000  | -1.889618000 |
| C | -4.336358000 | 3.005459000  | -2.143379000 |
| C | 4.046671000  | 4.564471000  | -2.330523000 |
| C | -4.082668000 | 4.090209000  | -2.998441000 |
| C | 5.056004000  | 5.365767000  | -2.852450000 |
| C | -5.113828000 | 4.763048000  | -3.645944000 |
| C | 6.349306000  | 4.859892000  | -2.946201000 |
| C | -6.430285000 | 4.359339000  | -3.448160000 |
| C | 6.629963000  | 3.565745000  | -2.504293000 |
| C | -6.715805000 | 3.288981000  | -2.598574000 |
| H | 5.751322000  | -1.398426000 | -1.798456000 |
| H | -5.740479000 | -1.287051000 | -1.703723000 |
| H | 4.950484000  | -5.377102000 | -4.655036000 |
| H | -4.996745000 | -4.804203000 | -5.124675000 |
| H | 7.591525000  | -2.244668000 | -3.270348000 |
| H | -7.612198000 | -1.923478000 | -3.234497000 |
| H | 5.804262000  | 1.775886000  | -1.603806000 |
| H | -5.869831000 | 1.791371000  | -1.284580000 |
| H | 4.809064000  | 6.379241000  | -3.171830000 |
| H | -4.859659000 | 5.597854000  | -4.300442000 |
| H | 7.645863000  | 3.171600000  | -2.566965000 |
| H | -7.748015000 | 2.972597000  | -2.437853000 |
| H | -7.239417000 | -3.693468000 | -4.958613000 |
| H | 7.186818000  | -4.247696000 | -4.708915000 |
| H | -7.237550000 | 4.888080000  | -3.960219000 |
| H | 7.142762000  | 5.486370000  | -3.359455000 |
| H | -1.933533000 | -2.934763000 | 0.606877000  |
| H | -0.877096000 | 1.367608000  | 5.086412000  |
| H | -0.013340000 | 0.065505000  | 4.783982000  |
| H | 0.055958000  | 4.002925000  | 0.572664000  |

|    |              |              |              |
|----|--------------|--------------|--------------|
| H  | 0.664228000  | 4.293164000  | 2.649240000  |
| H  | 0.851436000  | 4.332333000  | -0.771235000 |
| H  | 1.964440000  | -0.176748000 | 3.569411000  |
| H  | -1.928041000 | 2.794064000  | 0.803980000  |
| H  | -0.612733000 | -1.997739000 | 5.092089000  |
| H  | 0.889460000  | -4.456402000 | 2.173900000  |
| H  | 0.689569000  | -4.447679000 | -1.163067000 |
| H  | 0.036961000  | -4.155189000 | 0.863103000  |
| O  | -1.057761000 | -0.097347000 | 2.176094000  |
| O  | -3.617722000 | 1.284693000  | 2.169649000  |
| O  | -3.634310000 | 1.351320000  | -0.621796000 |
| O  | -3.610804000 | -1.504351000 | 2.088743000  |
| O  | -2.048675000 | -2.655016000 | 3.232500000  |
| O  | 0.044541000  | -4.085254000 | 1.885805000  |
| O  | 2.077202000  | -2.830799000 | 2.995818000  |
| O  | 2.077427000  | -2.646899000 | -1.754745000 |
| O  | 3.631866000  | -1.533903000 | 2.011756000  |
| O  | 3.631997000  | -1.402925000 | -0.724034000 |
| O  | 3.640035000  | 1.288303000  | 2.090546000  |
| O  | 3.612496000  | 1.380803000  | -0.648621000 |
| O  | 2.027370000  | 2.643999000  | -1.609146000 |
| O  | 2.099480000  | 2.447040000  | 3.254708000  |
| O  | 1.072935000  | 1.411042000  | 0.734876000  |
| O  | 1.411361000  | -0.121801000 | 2.780379000  |
| O  | 0.037684000  | -1.518621000 | 4.566853000  |
| O  | -0.028520000 | 1.084953000  | 4.718483000  |
| O  | 1.068991000  | -1.545362000 | 0.694608000  |
| O  | -1.386850000 | -2.143369000 | 0.684597000  |
| O  | -2.062588000 | -2.494570000 | -1.916535000 |
| O  | 0.002404000  | -3.951124000 | -0.703304000 |
| O  | -3.606346000 | -1.425119000 | -0.692886000 |
| O  | -0.000013000 | 3.780299000  | 2.175866000  |
| O  | 0.040495000  | 3.922045000  | -0.440094000 |
| O  | -1.389915000 | 1.993243000  | 0.777868000  |
| O  | -2.046929000 | 2.252366000  | 3.458615000  |
| O  | -2.062081000 | 2.474076000  | -1.747869000 |
| O  | 1.370874000  | -0.030715000 | -1.339793000 |
| O  | -1.104942000 | -0.052797000 | -0.802377000 |
| H  | 1.843853000  | -0.063746000 | -2.191338000 |
| O  | 0.079427000  | 1.778652000  | -3.195272000 |
| H  | 0.908853000  | 2.192771000  | -3.467011000 |
| Hf | 2.519519000  | -0.079256000 | 0.687970000  |
| Hf | -0.013700000 | -1.873862000 | 2.493287000  |
| Hf | 0.034999000  | 1.709635000  | 2.512915000  |
| Hf | -0.035330000 | 1.706741000  | -1.058108000 |
| Hf | -2.535298000 | -0.074476000 | 0.714744000  |

|    |              |              |              |
|----|--------------|--------------|--------------|
| Hf | 0.012198000  | -1.876115000 | -1.085993000 |
| F  | -2.844888000 | 4.529684000  | -3.204658000 |
| F  | 2.824842000  | 5.102509000  | -2.229935000 |
| F  | -3.002740000 | -4.297416000 | -3.650159000 |
| F  | 2.977319000  | -4.647744000 | -3.242320000 |
| C  | -1.819610000 | -1.677409000 | -5.264561000 |
| C  | -0.433288000 | -2.313433000 | -5.361144000 |
| C  | 0.426084000  | -1.477782000 | -4.415539000 |
| C  | -1.612607000 | -0.163669000 | -5.350560000 |
| C  | 1.889292000  | -1.332788000 | -4.747183000 |
| C  | -2.547287000 | 0.608382000  | -4.441163000 |
| H  | 2.316063000  | -2.341712000 | -4.587012000 |
| H  | -0.052032000 | -2.232782000 | -6.396026000 |
| H  | -2.199809000 | -1.925765000 | -4.259105000 |
| H  | -1.756064000 | 2.311314000  | -4.005802000 |
| H  | 2.010091000  | -1.074548000 | -5.812516000 |
| H  | 3.450394000  | -0.456100000 | -3.974714000 |
| H  | -2.358919000 | 0.284798000  | -3.393965000 |
| H  | -3.573666000 | 0.283219000  | -4.689416000 |
| H  | -0.878313000 | -3.763517000 | -4.175751000 |
| H  | -0.117512000 | 0.778540000  | -4.244222000 |
| H  | -2.442706000 | -2.044359000 | -7.058001000 |
| H  | -1.753791000 | 0.173686000  | -6.393855000 |
| O  | -2.771171000 | -2.173532000 | -6.159910000 |
| O  | 2.491803000  | -0.371060000 | -3.908718000 |
| O  | -2.460942000 | 1.989944000  | -4.596111000 |
| O  | 0.086067000  | -1.566949000 | -3.199274000 |
| O  | -0.392159000 | -3.661662000 | -5.009404000 |
| O  | -0.223799000 | 0.075101000  | -5.025270000 |

## Hf-NU-1000 (-F) Int2

|   |              |              |              |
|---|--------------|--------------|--------------|
| C | -3.248200000 | -2.182800000 | -1.650100000 |
| C | -3.229700000 | -2.386600000 | 2.900000000  |
| C | -3.232300000 | 2.034300000  | 3.104000000  |
| C | 3.276900000  | 2.142000000  | 2.939200000  |
| C | 3.226900000  | 2.366300000  | -1.338700000 |
| C | 3.259300000  | -2.277900000 | -1.561500000 |
| C | -3.265300000 | 2.236100000  | -1.457300000 |
| C | 3.257200000  | -2.506600000 | 2.716400000  |
| H | 4.090373000  | 2.682130000  | 3.471271000  |
| H | 4.065425000  | -3.146096000 | 3.135884000  |
| H | -4.031499000 | 2.547303000  | 3.683063000  |
| H | -4.030809000 | -2.989169000 | 3.381198000  |
| C | 5.602610000  | -2.272612000 | -2.437487000 |
| C | -5.595786000 | -2.060939000 | -2.489351000 |
| C | 4.329790000  | -2.866378000 | -2.424805000 |

|   |              |              |              |
|---|--------------|--------------|--------------|
| C | -4.329547000 | -2.665304000 | -2.557925000 |
| C | 4.130762000  | -3.975908000 | -3.261691000 |
| C | -4.148043000 | -3.658317000 | -3.529961000 |
| C | 5.142601000  | -4.467359000 | -4.081746000 |
| C | -5.161581000 | -4.033645000 | -4.402557000 |
| C | 6.388348000  | -3.847426000 | -4.081400000 |
| C | -6.400288000 | -3.407654000 | -4.316593000 |
| C | 6.621577000  | -2.745318000 | -3.256414000 |
| C | -6.620717000 | -2.418693000 | -3.355650000 |
| C | 5.613378000  | 2.787474000  | -1.961418000 |
| C | -5.678314000 | 2.630728000  | -1.944064000 |
| C | 4.294839000  | 3.259500000  | -1.877783000 |
| C | -4.339882000 | 3.009074000  | -2.133146000 |
| C | 4.052421000  | 4.571448000  | -2.308570000 |
| C | -4.089445000 | 4.100192000  | -2.981096000 |
| C | 5.064229000  | 5.376274000  | -2.820266000 |
| C | -5.123405000 | 4.777440000  | -3.619533000 |
| C | 6.357518000  | 4.870333000  | -2.913542000 |
| C | -6.439052000 | 4.372167000  | -3.419593000 |
| C | 6.635771000  | 3.572392000  | -2.481326000 |
| C | -6.721153000 | 3.295670000  | -2.576697000 |
| H | 5.760498000  | -1.420733000 | -1.772496000 |
| H | -5.740286000 | -1.289578000 | -1.730929000 |
| H | 4.931580000  | -5.336442000 | -4.706682000 |
| H | -4.952465000 | -4.805360000 | -5.144083000 |
| H | 7.599984000  | -2.261522000 | -3.247799000 |
| H | -7.592170000 | -1.926005000 | -3.285907000 |
| H | 5.805501000  | 1.775496000  | -1.599177000 |
| H | -5.869892000 | 1.788585000  | -1.277227000 |
| H | 4.819034000  | 6.392462000  | -3.132264000 |
| H | -4.871830000 | 5.616600000  | -4.269449000 |
| H | 7.651670000  | 3.178142000  | -2.543580000 |
| H | -7.752715000 | 2.978032000  | -2.414108000 |
| H | -7.197466000 | -3.695051000 | -5.005743000 |
| H | 7.181407000  | -4.232824000 | -4.725961000 |
| H | -7.248365000 | 4.904487000  | -3.924718000 |
| H | 7.152842000  | 5.499670000  | -3.318791000 |
| H | -1.932427000 | -2.937769000 | 0.609825000  |
| H | -0.874961000 | 1.383695000  | 5.077649000  |
| H | -0.011908000 | 0.080585000  | 4.784596000  |
| H | 0.057717000  | 4.004857000  | 0.563666000  |
| H | 0.662884000  | 4.296327000  | 2.645159000  |
| H | 0.843094000  | 4.337898000  | -0.785532000 |
| H | 1.965456000  | -0.169397000 | 3.567815000  |
| H | -1.929505000 | 2.791495000  | 0.798719000  |
| H | -0.612886000 | -1.987520000 | 5.102201000  |



|    |              |              |              |
|----|--------------|--------------|--------------|
| H  | 0.890862000  | -4.450949000 | 2.189301000  |
| H  | 0.678101000  | -4.452447000 | -1.153649000 |
| H  | 0.034167000  | -4.158120000 | 0.880698000  |
| O  | -1.058205000 | -0.097112000 | 2.174475000  |
| O  | -3.617787000 | 1.284556000  | 2.169323000  |
| O  | -3.632602000 | 1.340610000  | -0.629553000 |
| O  | -3.609794000 | -1.505083000 | 2.088119000  |
| O  | -2.048775000 | -2.651804000 | 3.237384000  |
| O  | 0.044126000  | -4.083526000 | 1.901470000  |
| O  | 2.077471000  | -2.827761000 | 3.001501000  |
| O  | 2.076490000  | -2.654465000 | -1.744261000 |
| O  | 3.630309000  | -1.535043000 | 2.009371000  |
| O  | 3.631591000  | -1.402113000 | -0.726312000 |
| O  | 3.640594000  | 1.288069000  | 2.089961000  |
| O  | 3.610651000  | 1.373217000  | -0.655335000 |
| O  | 2.030196000  | 2.646203000  | -1.608291000 |
| O  | 2.099588000  | 2.450092000  | 3.249581000  |
| O  | 1.073644000  | 1.406899000  | 0.724949000  |
| O  | 1.411267000  | -0.118944000 | 2.779263000  |
| O  | 0.036752000  | -1.510883000 | 4.573743000  |
| O  | -0.026098000 | 1.097992000  | 4.712539000  |
| O  | 1.068189000  | -1.545944000 | 0.698746000  |
| O  | -1.386188000 | -2.146161000 | 0.689678000  |
| O  | -2.056685000 | -2.478059000 | -1.918916000 |
| O  | -0.004241000 | -3.952302000 | -0.690683000 |
| O  | -3.613307000 | -1.437863000 | -0.687119000 |
| O  | 0.000879000  | 3.782215000  | 2.170109000  |
| O  | 0.037949000  | 3.922035000  | -0.447546000 |
| O  | -1.390947000 | 1.990902000  | 0.772899000  |
| O  | -2.046662000 | 2.255146000  | 3.455232000  |
| O  | -2.065186000 | 2.482297000  | -1.741849000 |
| O  | 1.360948000  | -0.042179000 | -1.359549000 |
| O  | -1.104550000 | -0.059488000 | -0.806352000 |
| H  | 1.840929000  | -0.079653000 | -2.205919000 |
| O  | 0.058651000  | 1.829804000  | -3.182582000 |
| H  | 0.899921000  | 2.199071000  | -3.478465000 |
| Hf | 2.520039000  | -0.074010000 | 0.685763000  |
| Hf | -0.015799000 | -1.869193000 | 2.503975000  |
| Hf | 0.035746000  | 1.712810000  | 2.501623000  |
| Hf | -0.039247000 | 1.712517000  | -1.080433000 |
| Hf | -2.536368000 | -0.071954000 | 0.711310000  |
| Hf | 0.012104000  | -1.878392000 | -1.063382000 |
| F  | -2.853087000 | 4.541295000  | -3.188742000 |
| F  | 2.830929000  | 5.109495000  | -2.207558000 |
| F  | -2.977723000 | -4.303149000 | -3.641170000 |
| F  | 2.957872000  | -4.610618000 | -3.294887000 |

|   |              |              |              |
|---|--------------|--------------|--------------|
| C | -1.825446000 | -1.646269000 | -5.267214000 |
| C | -0.452951000 | -2.310412000 | -5.419629000 |
| C | 0.478399000  | -1.634768000 | -4.431655000 |
| C | -1.672220000 | -0.126770000 | -5.412491000 |
| C | 1.904477000  | -1.375771000 | -4.813788000 |
| C | -2.576115000 | 0.616170000  | -4.443130000 |
| H | 2.388678000  | -2.373710000 | -4.772061000 |
| H | -0.073222000 | -2.173432000 | -6.448321000 |
| H | -2.151939000 | -1.878548000 | -4.237622000 |
| H | -1.767959000 | 2.315027000  | -4.031426000 |
| H | 1.947403000  | -1.029162000 | -5.859298000 |
| H | 3.460556000  | -0.503856000 | -4.035078000 |
| H | -2.320811000 | 0.283981000  | -3.412006000 |
| H | -3.613160000 | 0.283573000  | -4.629871000 |
| H | -1.083980000 | -3.842461000 | -4.420837000 |
| H | -0.199796000 | 0.826399000  | -4.436006000 |
| H | -2.569891000 | -2.018279000 | -7.012881000 |
| H | -1.942385000 | 0.158186000  | -6.448851000 |
| O | -2.808700000 | -2.199588000 | -6.095441000 |
| O | 2.503114000  | -0.464051000 | -3.927077000 |
| O | -2.510650000 | 2.001103000  | -4.578746000 |
| O | 0.127419000  | -1.622662000 | -3.245864000 |
| O | -0.479512000 | -3.687147000 | -5.163760000 |
| O | -0.301445000 | 0.207429000  | -5.223241000 |

## Hf-NU-1000 (-F) Int2\_Ro

|   |              |              |              |
|---|--------------|--------------|--------------|
| C | -3.248200000 | -2.182800000 | -1.650100000 |
| C | -3.229700000 | -2.386600000 | 2.900000000  |
| C | -3.232300000 | 2.034300000  | 3.104000000  |
| C | 3.276900000  | 2.142000000  | 2.939200000  |
| C | 3.226900000  | 2.366300000  | -1.338700000 |
| C | 3.259300000  | -2.277900000 | -1.561500000 |
| C | -3.265300000 | 2.236100000  | -1.457300000 |
| C | 3.257200000  | -2.506600000 | 2.716400000  |
| H | 4.088403000  | 2.691874000  | 3.464329000  |
| H | 4.062948000  | -3.136437000 | 3.154630000  |
| H | -4.031048000 | 2.548708000  | 3.683329000  |
| H | -4.030624000 | -2.968692000 | 3.406248000  |
| C | 5.634105000  | -2.442370000 | -2.317001000 |
| C | -5.678731000 | -2.586921000 | -2.067257000 |
| C | 4.340491000  | -2.985728000 | -2.305936000 |
| C | -4.344356000 | -2.938718000 | -2.326287000 |
| C | 4.134959000  | -4.178388000 | -3.015338000 |
| C | -4.119985000 | -3.989888000 | -3.229032000 |
| C | 5.162882000  | -4.799050000 | -3.717989000 |
| C | -5.169537000 | -4.663216000 | -3.845014000 |

|   |              |              |              |
|---|--------------|--------------|--------------|
| C | 6.431047000  | -4.225494000 | -3.724996000 |
| C | -6.481238000 | -4.287560000 | -3.570920000 |
| C | 6.670013000  | -3.043385000 | -3.021989000 |
| C | -6.739151000 | -3.244119000 | -2.680334000 |
| C | 5.565981000  | 2.684179000  | -2.162496000 |
| C | -5.676718000 | 2.846599000  | -1.695400000 |
| C | 4.288351000  | 3.219293000  | -1.946179000 |
| C | -4.350016000 | 3.023677000  | -2.119064000 |
| C | 4.072849000  | 4.549968000  | -2.327806000 |
| C | -4.128213000 | 3.915058000  | -3.180596000 |
| C | 5.072932000  | 5.318176000  | -2.912817000 |
| C | -5.176700000 | 4.589086000  | -3.802307000 |
| C | 6.325268000  | 4.752181000  | -3.135486000 |
| C | -6.481257000 | 4.390328000  | -3.359919000 |
| C | 6.574898000  | 3.431585000  | -2.758993000 |
| C | -6.733837000 | 3.517650000  | -2.299097000 |
| H | 5.793724000  | -1.522422000 | -1.751529000 |
| H | -5.850874000 | -1.767534000 | -1.367197000 |
| H | 4.948820000  | -5.730178000 | -4.244781000 |
| H | -4.934089000 | -5.471677000 | -4.538473000 |
| H | 7.665082000  | -2.594915000 | -3.021470000 |
| H | -7.766515000 | -2.945582000 | -2.463885000 |
| H | 5.735762000  | 1.652136000  | -1.850031000 |
| H | -5.846026000 | 2.147403000  | -0.874451000 |
| H | 4.852297000  | 6.352730000  | -3.179740000 |
| H | -4.945176000 | 5.264923000  | -4.627017000 |
| H | 7.557888000  | 2.988154000  | -2.927804000 |
| H | -7.754688000 | 3.360982000  | -1.945897000 |
| H | -7.304753000 | -4.814387000 | -4.058343000 |
| H | 7.237508000  | -4.710946000 | -4.279199000 |
| H | -7.301994000 | 4.922200000  | -3.846358000 |
| H | 7.111249000  | 5.351908000  | -3.599870000 |
| H | -1.921962000 | -2.940238000 | 0.573437000  |
| H | -0.881420000 | 1.345322000  | 5.077460000  |
| H | -0.015409000 | 0.046894000  | 4.771646000  |
| H | 0.045630000  | 4.021172000  | 0.575731000  |
| H | 0.667395000  | 4.287397000  | 2.655778000  |
| H | 0.845579000  | 4.345139000  | -0.765189000 |
| H | 1.963020000  | -0.197640000 | 3.559952000  |
| H | -1.926078000 | 2.806246000  | 0.830839000  |
| H | -0.609343000 | -2.026482000 | 5.066805000  |
| H | 0.900762000  | -4.449547000 | 2.108868000  |
| H | 0.633003000  | -4.414402000 | -1.270640000 |
| H | 0.045871000  | -4.137776000 | 0.804197000  |
| O | -1.060401000 | -0.103425000 | 2.171537000  |
| O | -3.619852000 | 1.289871000  | 2.165539000  |

|    |              |              |              |
|----|--------------|--------------|--------------|
| O  | -3.633398000 | 1.377600000  | -0.602836000 |
| O  | -3.610956000 | -1.507548000 | 2.084647000  |
| O  | -2.045931000 | -2.671509000 | 3.209583000  |
| O  | 0.051529000  | -4.083628000 | 1.825973000  |
| O  | 2.074019000  | -2.843958000 | 2.972644000  |
| O  | 2.064029000  | -2.559051000 | -1.843153000 |
| O  | 3.631934000  | -1.530512000 | 2.018222000  |
| O  | 3.625844000  | -1.417366000 | -0.710058000 |
| O  | 3.642369000  | 1.289469000  | 2.091382000  |
| O  | 3.616210000  | 1.371744000  | -0.656387000 |
| O  | 2.028064000  | 2.678258000  | -1.547311000 |
| O  | 2.098450000  | 2.439728000  | 3.259593000  |
| O  | 1.075680000  | 1.410539000  | 0.743603000  |
| O  | 1.410913000  | -0.133921000 | 2.770930000  |
| O  | 0.038319000  | -1.540063000 | 4.545040000  |
| O  | -0.030394000 | 1.065843000  | 4.713044000  |
| O  | 1.066318000  | -1.543080000 | 0.666537000  |
| O  | -1.391551000 | -2.137137000 | 0.646001000  |
| O  | -2.058759000 | -2.367905000 | -2.007660000 |
| O  | -0.008303000 | -3.900773000 | -0.765089000 |
| O  | -3.613301000 | -1.392499000 | -0.720784000 |
| O  | -0.000937000 | 3.778926000  | 2.183350000  |
| O  | 0.021018000  | 3.956953000  | -0.437629000 |
| O  | -1.389640000 | 2.006131000  | 0.773359000  |
| O  | -2.047457000 | 2.248708000  | 3.459153000  |
| O  | -2.074676000 | 2.471734000  | -1.785439000 |
| O  | 1.371618000  | -0.004064000 | -1.349040000 |
| O  | -1.089948000 | -0.030846000 | -0.785562000 |
| H  | 1.893917000  | 0.007660000  | -2.175754000 |
| O  | 0.087144000  | 1.696010000  | -3.147864000 |
| H  | -0.613480000 | 2.067413000  | -3.693941000 |
| Hf | 2.526415000  | -0.065858000 | 0.680249000  |
| Hf | -0.012097000 | -1.879240000 | 2.468916000  |
| Hf | 0.040476000  | 1.704975000  | 2.508013000  |
| Hf | -0.030485000 | 1.744388000  | -1.069102000 |
| Hf | -2.530377000 | -0.067849000 | 0.706275000  |
| Hf | 0.018247000  | -1.825844000 | -1.110268000 |
| F  | -2.902246000 | 4.133689000  | -3.658191000 |
| F  | 2.893116000  | 5.143319000  | -2.101749000 |
| F  | -2.883513000 | -4.379051000 | -3.534430000 |
| F  | 2.941984000  | -4.778410000 | -3.016193000 |
| C  | -1.566862000 | -0.489963000 | -5.885135000 |
| C  | -0.485966000 | -1.583559000 | -5.646251000 |
| C  | 0.417607000  | -1.154426000 | -4.506293000 |
| C  | -2.578367000 | -0.388984000 | -4.750661000 |
| C  | 1.671549000  | -0.407573000 | -4.867452000 |

|   |              |              |              |
|---|--------------|--------------|--------------|
| C | -3.500357000 | 0.809259000  | -4.888149000 |
| H | 2.397561000  | -1.210608000 | -5.112419000 |
| H | 0.135459000  | -1.617023000 | -6.562227000 |
| H | -2.136464000 | -0.808728000 | -6.779997000 |
| H | -5.172130000 | 1.296730000  | -3.988050000 |
| H | 1.488414000  | 0.112118000  | -5.828757000 |
| H | 1.479912000  | 1.095329000  | -3.705415000 |
| H | -3.881860000 | 0.878603000  | -5.926420000 |
| H | -2.953938000 | 1.741834000  | -4.664031000 |
| H | -1.715130000 | -2.817773000 | -4.794217000 |
| H | -4.136426000 | -1.408647000 | -4.278430000 |
| H | -0.594179000 | 0.828535000  | -6.942751000 |
| H | -2.062032000 | -0.301779000 | -3.769067000 |
| O | -0.984056000 | 0.783910000  | -6.063512000 |
| O | 2.203215000  | 0.422108000  | -3.904006000 |
| O | -4.543491000 | 0.567592000  | -3.968211000 |
| O | 0.119003000  | -1.466676000 | -3.363033000 |
| O | -1.007134000 | -2.852180000 | -5.461106000 |
| O | -3.338991000 | -1.577042000 | -4.803481000 |

## Hf-NU-1000 (-F) TS3

|   |              |              |              |
|---|--------------|--------------|--------------|
| C | -3.248200000 | -2.182800000 | -1.650100000 |
| C | -3.229700000 | -2.386600000 | 2.900000000  |
| C | -3.232300000 | 2.034300000  | 3.104000000  |
| C | 3.276900000  | 2.142000000  | 2.939200000  |
| C | 3.226900000  | 2.366300000  | -1.338700000 |
| C | 3.259300000  | -2.277900000 | -1.561500000 |
| C | -3.265300000 | 2.236100000  | -1.457300000 |
| C | 3.257200000  | -2.506600000 | 2.716400000  |
| H | 4.090573000  | 2.709030000  | 3.442684000  |
| H | 4.062541000  | -3.144829000 | 3.142937000  |
| H | -4.031953000 | 2.568895000  | 3.663083000  |
| H | -4.032516000 | -2.987220000 | 3.380761000  |
| C | 5.683100000  | -2.695186000 | -2.008810000 |
| C | -5.308940000 | -1.530367000 | -2.871246000 |
| C | 4.342399000  | -2.934343000 | -2.350035000 |
| C | -4.323723000 | -2.500093000 | -2.631203000 |
| C | 4.098924000  | -3.790172000 | -3.436033000 |
| C | -4.343718000 | -3.658875000 | -3.414334000 |
| C | 5.136705000  | -4.385020000 | -4.147248000 |
| C | -5.288653000 | -3.848742000 | -4.416890000 |
| C | 6.454412000  | -4.133280000 | -3.778592000 |
| C | -6.235786000 | -2.856627000 | -4.655502000 |
| C | 6.730835000  | -3.285453000 | -2.704612000 |
| C | -6.251559000 | -1.696634000 | -3.878725000 |
| C | 5.572378000  | 2.767313000  | -2.097536000 |

|   |              |              |              |
|---|--------------|--------------|--------------|
| C | -5.675863000 | 2.633641000  | -1.991891000 |
| C | 4.271534000  | 3.257474000  | -1.913838000 |
| C | -4.328566000 | 2.761246000  | -2.363178000 |
| C | 4.022162000  | 4.585004000  | -2.284822000 |
| C | -4.059851000 | 3.314210000  | -3.623087000 |
| C | 5.010709000  | 5.394186000  | -2.831468000 |
| C | -5.076686000 | 3.747457000  | -4.468093000 |
| C | 6.286979000  | 4.872079000  | -3.025029000 |
| C | -6.402716000 | 3.624064000  | -4.063389000 |
| C | 6.570863000  | 3.556063000  | -2.656771000 |
| C | -6.705582000 | 3.060746000  | -2.822048000 |
| H | 5.871375000  | -2.026689000 | -1.167027000 |
| H | -5.286442000 | -0.625279000 | -2.258366000 |
| H | 4.887489000  | -5.038391000 | -4.984678000 |
| H | -5.258421000 | -4.770655000 | -4.999161000 |
| H | 7.763316000  | -3.085462000 | -2.412407000 |
| H | -6.987346000 | -0.913074000 | -4.073437000 |
| H | 5.768963000  | 1.737585000  | -1.793061000 |
| H | -5.886103000 | 2.179276000  | -1.021540000 |
| H | 4.763731000  | 6.424404000  | -3.091720000 |
| H | -4.806559000 | 4.169682000  | -5.437667000 |
| H | 7.572264000  | 3.147798000  | -2.803667000 |
| H | -7.744178000 | 2.957703000  | -2.502652000 |
| H | -6.964802000 | -2.991340000 | -5.457534000 |
| H | 7.268150000  | -4.602739000 | -4.335951000 |
| H | -7.202116000 | 3.969640000  | -4.723027000 |
| H | 7.064872000  | 5.503128000  | -3.460399000 |
| H | -1.920307000 | -2.926867000 | 0.598568000  |
| H | -0.883676000 | 1.321174000  | 5.132150000  |
| H | -0.017024000 | 0.021419000  | 4.807171000  |
| H | 0.082982000  | 4.017672000  | 0.647021000  |
| H | 0.680374000  | 4.270502000  | 2.712881000  |
| H | 0.938066000  | 4.315636000  | -0.669433000 |
| H | 1.968578000  | -0.200727000 | 3.593024000  |
| H | -1.901553000 | 2.806733000  | 0.835055000  |
| H | -0.618736000 | -2.028101000 | 5.082624000  |
| H | 0.876920000  | -4.472767000 | 2.189358000  |
| H | 0.673184000  | -4.451015000 | -1.157751000 |
| H | 0.048111000  | -4.150654000 | 0.861376000  |
| O | -1.054965000 | -0.099775000 | 2.195445000  |
| O | -3.616462000 | 1.286246000  | 2.169251000  |
| O | -3.633796000 | 1.396144000  | -0.582497000 |
| O | -3.611353000 | -1.498651000 | 2.094014000  |
| O | -2.049822000 | -2.657334000 | 3.229498000  |
| O | 0.042700000  | -4.086243000 | 1.891540000  |
| O | 2.077188000  | -2.831615000 | 2.988809000  |

|    |              |              |              |
|----|--------------|--------------|--------------|
| O  | 2.072817000  | -2.618369000 | -1.768331000 |
| O  | 3.639076000  | -1.533457000 | 2.016029000  |
| O  | 3.629355000  | -1.401749000 | -0.716636000 |
| O  | 3.639091000  | 1.283850000  | 2.097293000  |
| O  | 3.616820000  | 1.399688000  | -0.629278000 |
| O  | 2.013904000  | 2.629659000  | -1.602206000 |
| O  | 2.101750000  | 2.430486000  | 3.281484000  |
| O  | 1.088780000  | 1.407541000  | 0.779915000  |
| O  | 1.417247000  | -0.134765000 | 2.803670000  |
| O  | 0.036804000  | -1.542668000 | 4.569497000  |
| O  | -0.035807000 | 1.046131000  | 4.757149000  |
| O  | 1.073132000  | -1.524277000 | 0.692247000  |
| O  | -1.378663000 | -2.132951000 | 0.688164000  |
| O  | -2.080400000 | -2.574596000 | -1.889270000 |
| O  | 0.024559000  | -3.934916000 | -0.666521000 |
| O  | -3.583666000 | -1.421323000 | -0.688238000 |
| O  | 0.010650000  | 3.768981000  | 2.234559000  |
| O  | 0.094774000  | 3.945924000  | -0.370022000 |
| O  | -1.365886000 | 2.003994000  | 0.828392000  |
| O  | -2.050693000 | 2.233488000  | 3.482199000  |
| O  | -2.072163000 | 2.596108000  | -1.652922000 |
| O  | 1.359817000  | -0.003142000 | -1.355204000 |
| O  | -1.101517000 | -0.022221000 | -0.772312000 |
| H  | 1.818894000  | -0.024089000 | -2.218713000 |
| O  | -0.164663000 | 1.641216000  | -3.196014000 |
| H  | -0.466026000 | 2.498545000  | -3.529429000 |
| Hf | 2.542317000  | -0.092867000 | 0.688689000  |
| Hf | -0.003703000 | -1.882594000 | 2.487675000  |
| Hf | 0.041496000  | 1.691343000  | 2.568701000  |
| Hf | -0.011725000 | 1.722025000  | -0.952890000 |
| Hf | -2.530493000 | -0.079134000 | 0.735643000  |
| Hf | 0.012176000  | -1.869901000 | -1.105718000 |
| F  | -2.806979000 | 3.399642000  | -4.089164000 |
| F  | 2.815107000  | 5.134564000  | -2.081891000 |
| F  | -3.452168000 | -4.624469000 | -3.191884000 |
| F  | 2.855137000  | -4.058272000 | -3.837827000 |
| C  | -1.878683000 | -0.027018000 | -5.061618000 |
| C  | -0.722674000 | -2.181354000 | -5.267565000 |
| C  | 0.209740000  | -1.573945000 | -4.451886000 |
| C  | -3.042062000 | -0.570420000 | -5.821924000 |
| C  | 1.449655000  | -0.894785000 | -4.974651000 |
| C  | -4.184200000 | 0.437674000  | -5.756678000 |
| H  | 2.251571000  | -1.650321000 | -5.031462000 |
| H  | -0.645530000 | -2.197514000 | -6.355699000 |
| H  | -1.113756000 | 0.507286000  | -5.661900000 |
| H  | -5.880056000 | 0.609859000  | -6.685439000 |

|   |              |              |              |
|---|--------------|--------------|--------------|
| H | 1.285345000  | -0.549026000 | -6.014215000 |
| H | 1.232195000  | 0.785848000  | -3.992900000 |
| H | -3.823685000 | 1.427174000  | -6.104545000 |
| H | -4.513365000 | 0.547460000  | -4.705767000 |
| H | -1.646575000 | -2.941172000 | -3.784364000 |
| H | -3.481967000 | -0.930709000 | -7.639856000 |
| H | -1.063306000 | 0.934969000  | -3.439973000 |
| H | -3.386923000 | -1.503749000 | -5.326111000 |
| O | -2.016289000 | 0.217185000  | -3.831418000 |
| O | 1.940305000  | 0.127619000  | -4.142441000 |
| O | -5.199990000 | -0.064790000 | -6.592530000 |
| O | 0.031234000  | -1.611675000 | -3.175743000 |
| O | -1.672450000 | -2.989757000 | -4.765542000 |
| O | -2.658816000 | -0.793982000 | -7.152248000 |

## Hf-NU-1000 (-F) Int3

|   |              |              |              |
|---|--------------|--------------|--------------|
| C | -3.248200000 | -2.182800000 | -1.650100000 |
| C | -3.229700000 | -2.386600000 | 2.900000000  |
| C | -3.232300000 | 2.034300000  | 3.104000000  |
| C | 3.276900000  | 2.142000000  | 2.939200000  |
| C | 3.226900000  | 2.366300000  | -1.338700000 |
| C | 3.259300000  | -2.277900000 | -1.561500000 |
| C | -3.265300000 | 2.236100000  | -1.457300000 |
| C | 3.257200000  | -2.506600000 | 2.716400000  |
| H | 4.090694000  | 2.714900000  | 3.435833000  |
| H | 4.061880000  | -3.140497000 | 3.150118000  |
| H | -4.031773000 | 2.575310000  | 3.656997000  |
| H | -4.032128000 | -2.980680000 | 3.389472000  |
| C | 5.686793000  | -2.618653000 | -2.052821000 |
| C | -5.423435000 | -1.757442000 | -2.795732000 |
| C | 4.349826000  | -2.947184000 | -2.329089000 |
| C | -4.341287000 | -2.618822000 | -2.570533000 |
| C | 4.117844000  | -3.899603000 | -3.334798000 |
| C | -4.309290000 | -3.827101000 | -3.278936000 |
| C | 5.162870000  | -4.498588000 | -4.031912000 |
| C | -5.301537000 | -4.167317000 | -4.192718000 |
| C | 6.476411000  | -4.152357000 | -3.731805000 |
| C | -6.358218000 | -3.285773000 | -4.410650000 |
| C | 6.741593000  | -3.208683000 | -2.737844000 |
| C | -6.423248000 | -2.077135000 | -3.710554000 |
| C | 5.562179000  | 2.730352000  | -2.141310000 |
| C | -5.663099000 | 2.658879000  | -2.019882000 |
| C | 4.272366000  | 3.240821000  | -1.935842000 |
| C | -4.310877000 | 2.756510000  | -2.381563000 |
| C | 4.034934000  | 4.569885000  | -2.308768000 |
| C | -4.020736000 | 3.281989000  | -3.648828000 |



|   |              |              |              |
|---|--------------|--------------|--------------|
| C | 5.024727000  | 5.362191000  | -2.877235000 |
| C | -5.021564000 | 3.710065000  | -4.513604000 |
| C | 6.289457000  | 4.820492000  | -3.091809000 |
| C | -6.352905000 | 3.617105000  | -4.118615000 |
| C | 6.561149000  | 3.502055000  | -2.722932000 |
| C | -6.676952000 | 3.088655000  | -2.867720000 |
| H | 5.866608000  | -1.878224000 | -1.271604000 |
| H | -5.445986000 | -0.817974000 | -2.237068000 |
| H | 4.922032000  | -5.230945000 | -4.803854000 |
| H | -5.231215000 | -5.123736000 | -4.712296000 |
| H | 7.770800000  | -2.934878000 | -2.498847000 |
| H | -7.251125000 | -1.384491000 | -3.879970000 |
| H | 5.749094000  | 1.698653000  | -1.836961000 |
| H | -5.889262000 | 2.227992000  | -1.042391000 |
| H | 4.788038000  | 6.394712000  | -3.137884000 |
| H | -4.737900000 | 4.101774000  | -5.491706000 |
| H | 7.553477000  | 3.078596000  | -2.887160000 |
| H | -7.720307000 | 3.010628000  | -2.556928000 |
| H | -7.143362000 | -3.553934000 | -5.122622000 |
| H | 7.295721000  | -4.624040000 | -4.279051000 |
| H | -7.139651000 | 3.954170000  | -4.796921000 |
| H | 7.068163000  | 5.438099000  | -3.544607000 |
| H | -1.919397000 | -2.921135000 | 0.588774000  |
| H | -0.881169000 | 1.300998000  | 5.151018000  |
| H | -0.018582000 | 0.000534000  | 4.806911000  |
| H | 0.084245000  | 4.025544000  | 0.672626000  |
| H | 0.683986000  | 4.264365000  | 2.733548000  |
| H | 0.942626000  | 4.328996000  | -0.641545000 |
| H | 1.965637000  | -0.210704000 | 3.594030000  |
| H | -1.898806000 | 2.816132000  | 0.845736000  |
| H | -0.617643000 | -2.043303000 | 5.067076000  |
| H | 0.873384000  | -4.473103000 | 2.158280000  |
| H | 0.639828000  | -4.446396000 | -1.196349000 |
| H | 0.047388000  | -4.139840000 | 0.827796000  |
| O | -1.055876000 | -0.098651000 | 2.192255000  |
| O | -3.615872000 | 1.285215000  | 2.170329000  |
| O | -3.640820000 | 1.412154000  | -0.572412000 |
| O | -3.613116000 | -1.501119000 | 2.090675000  |
| O | -2.048913000 | -2.661287000 | 3.221177000  |
| O | 0.041444000  | -4.081171000 | 1.861395000  |
| O | 2.076207000  | -2.835867000 | 2.978221000  |
| O | 2.073723000  | -2.606315000 | -1.782448000 |
| O | 3.640388000  | -1.532356000 | 2.017444000  |
| O | 3.625695000  | -1.394266000 | -0.719975000 |
| O | 3.637924000  | 1.284186000  | 2.096989000  |
| O | 3.614239000  | 1.405446000  | -0.623125000 |

|    |              |              |              |
|----|--------------|--------------|--------------|
| O  | 2.011213000  | 2.637352000  | -1.595556000 |
| O  | 2.102448000  | 2.424378000  | 3.290310000  |
| O  | 1.089109000  | 1.412937000  | 0.792955000  |
| O  | 1.416100000  | -0.138505000 | 2.803931000  |
| O  | 0.036467000  | -1.552336000 | 4.557376000  |
| O  | -0.037476000 | 1.027940000  | 4.765679000  |
| O  | 1.072920000  | -1.515972000 | 0.682152000  |
| O  | -1.387203000 | -2.120511000 | 0.674283000  |
| O  | -2.079802000 | -2.549978000 | -1.901014000 |
| O  | 0.013259000  | -3.919813000 | -0.687780000 |
| O  | -3.594798000 | -1.393431000 | -0.715290000 |
| O  | 0.012166000  | 3.766766000  | 2.253912000  |
| O  | 0.098873000  | 3.957348000  | -0.345964000 |
| O  | -1.364831000 | 2.012147000  | 0.842229000  |
| O  | -2.051797000 | 2.227755000  | 3.489340000  |
| O  | -2.065052000 | 2.588294000  | -1.647392000 |
| O  | 1.356958000  | 0.020241000  | -1.361315000 |
| O  | -1.103465000 | -0.001280000 | -0.774094000 |
| H  | 1.810415000  | 0.006216000  | -2.230290000 |
| O  | -0.180856000 | 1.689323000  | -3.234668000 |
| H  | -0.527038000 | 2.546530000  | -3.527728000 |
| Hf | 2.544105000  | -0.096679000 | 0.689304000  |
| Hf | -0.003736000 | -1.884800000 | 2.471246000  |
| Hf | 0.038743000  | 1.687179000  | 2.585985000  |
| Hf | -0.003385000 | 1.732505000  | -0.921600000 |
| Hf | -2.532898000 | -0.074267000 | 0.732888000  |
| Hf | 0.010076000  | -1.851937000 | -1.133877000 |
| F  | -2.758403000 | 3.353113000  | -4.098782000 |
| F  | 2.839398000  | 5.136642000  | -2.086160000 |
| F  | -3.330158000 | -4.700381000 | -3.062693000 |
| F  | 2.879013000  | -4.266164000 | -3.665227000 |
| C  | -2.106017000 | -0.015051000 | -5.061052000 |
| C  | -0.550368000 | -2.351116000 | -5.267891000 |
| C  | 0.284247000  | -1.649451000 | -4.447575000 |
| C  | -3.163687000 | -0.767632000 | -5.790802000 |
| C  | 1.583868000  | -1.039931000 | -4.894067000 |
| C  | -4.482437000 | 0.011057000  | -5.780215000 |
| H  | 2.390073000  | -1.777591000 | -4.745022000 |
| H  | -0.416870000 | -2.426577000 | -6.347664000 |
| H  | -1.318284000 | 0.459357000  | -5.693658000 |
| H  | -5.710109000 | -1.455432000 | -6.011586000 |
| H  | 1.558268000  | -0.821210000 | -5.978509000 |
| H  | 1.251461000  | 0.733088000  | -4.116145000 |
| H  | -4.341619000 | 0.986771000  | -6.272344000 |
| H  | -4.802334000 | 0.201167000  | -4.738837000 |
| H  | -1.576991000 | -3.000517000 | -3.803997000 |

|   |              |              |              |
|---|--------------|--------------|--------------|
| H | -3.557209000 | -1.237688000 | -7.591872000 |
| H | -0.977230000 | 1.066939000  | -3.403649000 |
| H | -3.326433000 | -1.716948000 | -5.230919000 |
| O | -2.191899000 | 0.206992000  | -3.852759000 |
| O | 1.979018000  | 0.088953000  | -4.135580000 |
| O | -5.446073000 | -0.682347000 | -6.531682000 |
| O | 0.010328000  | -1.597044000 | -3.167075000 |
| O | -1.563147000 | -3.101778000 | -4.779421000 |
| O | -2.752519000 | -1.004527000 | -7.107864000 |

## Hf-NU-1000 (-F) TS4

|   |              |              |              |
|---|--------------|--------------|--------------|
| C | -3.248200000 | -2.182800000 | -1.650100000 |
| C | -3.229700000 | -2.386600000 | 2.900000000  |
| C | -3.232300000 | 2.034300000  | 3.104000000  |
| C | 3.276900000  | 2.142000000  | 2.939200000  |
| C | 3.226900000  | 2.366300000  | -1.338700000 |
| C | 3.259300000  | -2.277900000 | -1.561500000 |
| C | -3.265300000 | 2.236100000  | -1.457300000 |
| C | 3.257200000  | -2.506600000 | 2.716400000  |
| H | 4.087728000  | 2.684333000  | 3.472948000  |
| H | 4.062994000  | -3.138738000 | 3.151339000  |
| H | -4.032955000 | 2.534143000  | 3.692659000  |
| H | -4.031241000 | -2.981283000 | 3.390431000  |
| C | 5.674373000  | -2.653659000 | -2.104058000 |
| C | -5.669938000 | -2.523612000 | -2.147030000 |
| C | 4.325927000  | -2.851693000 | -2.435321000 |
| C | -4.331094000 | -2.799946000 | -2.467144000 |
| C | 4.049511000  | -3.572851000 | -3.606260000 |
| C | -4.090288000 | -3.633747000 | -3.571187000 |
| C | 5.064480000  | -4.080942000 | -4.411426000 |
| C | -5.131585000 | -4.191638000 | -4.306547000 |
| C | 6.393531000  | -3.881304000 | -4.047356000 |
| C | -6.447622000 | -3.906144000 | -3.959532000 |
| C | 6.701636000  | -3.165884000 | -2.889408000 |
| C | -6.721234000 | -3.061898000 | -2.879752000 |
| C | 5.597582000  | 2.780233000  | -2.017064000 |
| C | -5.669858000 | 2.870701000  | -1.630001000 |
| C | 4.287606000  | 3.262779000  | -1.882021000 |
| C | -4.345322000 | 3.072882000  | -2.047954000 |
| C | 4.043412000  | 4.586016000  | -2.273505000 |
| C | -4.107061000 | 4.092395000  | -2.986065000 |
| C | 5.046166000  | 5.394169000  | -2.797111000 |
| C | -5.147107000 | 4.863207000  | -3.498325000 |
| C | 6.331185000  | 4.878836000  | -2.943150000 |
| C | -6.450185000 | 4.641115000  | -3.061567000 |
| C | 6.610600000  | 3.568723000  | -2.550662000 |

|   |              |              |              |
|---|--------------|--------------|--------------|
| C | -6.715054000 | 3.645129000  | -2.119431000 |
| H | 5.888019000  | -2.082645000 | -1.198436000 |
| H | -5.856300000 | -1.858100000 | -1.302360000 |
| H | 4.791564000  | -4.629858000 | -5.314191000 |
| H | -4.885349000 | -4.830731000 | -5.155333000 |
| H | 7.742384000  | -3.007161000 | -2.600951000 |
| H | -7.752079000 | -2.822930000 | -2.612205000 |
| H | 5.790587000  | 1.757085000  | -1.687645000 |
| H | -5.848830000 | 2.077804000  | -0.901834000 |
| H | 4.801375000  | 6.419914000  | -3.076499000 |
| H | -4.909468000 | 5.635858000  | -4.230755000 |
| H | 7.619982000  | 3.166668000  | -2.655287000 |
| H | -7.734578000 | 3.474254000  | -1.766830000 |
| H | -7.263882000 | -4.339784000 | -4.541964000 |
| H | 7.190252000  | -4.286712000 | -4.675092000 |
| H | -7.261008000 | 5.257042000  | -3.458069000 |
| H | 7.119395000  | 5.510652000  | -3.358484000 |
| H | -1.928481000 | -2.942231000 | 0.609910000  |
| H | -0.875281000 | 1.375076000  | 5.066905000  |
| H | -0.013458000 | 0.070321000  | 4.771211000  |
| H | 0.059954000  | 4.005887000  | 0.543791000  |
| H | 0.662924000  | 4.292840000  | 2.624973000  |
| H | 0.865226000  | 4.315633000  | -0.799374000 |
| H | 1.963375000  | -0.177707000 | 3.563855000  |
| H | -1.911754000 | 2.795451000  | 0.789808000  |
| H | -0.613593000 | -1.995190000 | 5.079582000  |
| H | 0.894996000  | -4.449585000 | 2.168917000  |
| H | 0.574279000  | -4.493006000 | -1.175926000 |
| H | 0.015990000  | -4.162422000 | 0.870103000  |
| O | -1.058785000 | -0.095907000 | 2.172653000  |
| O | -3.614132000 | 1.295266000  | 2.158099000  |
| O | -3.623694000 | 1.315831000  | -0.657547000 |
| O | -3.609650000 | -1.504913000 | 2.087066000  |
| O | -2.047610000 | -2.658600000 | 3.226246000  |
| O | 0.044171000  | -4.083366000 | 1.892282000  |
| O | 2.075931000  | -2.827963000 | 2.992290000  |
| O | 2.097347000  | -2.727024000 | -1.652986000 |
| O | 3.635270000  | -1.542982000 | 2.000316000  |
| O | 3.631153000  | -1.366618000 | -0.756824000 |
| O | 3.642560000  | 1.285414000  | 2.094350000  |
| O | 3.613552000  | 1.374279000  | -0.654413000 |
| O | 2.026960000  | 2.639103000  | -1.603307000 |
| O | 2.097498000  | 2.451194000  | 3.244612000  |
| O | 1.078316000  | 1.396659000  | 0.717631000  |
| O | 1.415548000  | -0.123377000 | 2.771170000  |
| O | 0.037616000  | -1.515039000 | 4.556268000  |

|    |              |              |              |
|----|--------------|--------------|--------------|
| O  | -0.025546000 | 1.089410000  | 4.703818000  |
| O  | 1.066261000  | -1.534254000 | 0.678881000  |
| O  | -1.387129000 | -2.145594000 | 0.671135000  |
| O  | -2.050487000 | -2.389724000 | -1.978673000 |
| O  | -0.063853000 | -3.961904000 | -0.685884000 |
| O  | -3.616530000 | -1.452550000 | -0.680085000 |
| O  | 0.002756000  | 3.776583000  | 2.149511000  |
| O  | 0.043594000  | 3.924689000  | -0.468397000 |
| O  | -1.380564000 | 1.990074000  | 0.755839000  |
| O  | -2.046143000 | 2.258245000  | 3.452467000  |
| O  | -2.069346000 | 2.500074000  | -1.744123000 |
| O  | 1.349751000  | -0.038289000 | -1.423300000 |
| O  | -1.077160000 | -0.063633000 | -0.794923000 |
| H  | 1.936688000  | -0.041551000 | -2.201507000 |
| O  | -0.089050000 | 1.771419000  | -3.236857000 |
| H  | -0.819736000 | 2.349885000  | -3.507902000 |
| Hf | 2.530351000  | -0.080990000 | 0.675313000  |
| Hf | -0.011516000 | -1.870276000 | 2.482783000  |
| Hf | 0.042219000  | 1.707307000  | 2.495527000  |
| Hf | -0.028489000 | 1.707455000  | -1.077578000 |
| Hf | -2.523951000 | -0.080469000 | 0.701461000  |
| Hf | 0.028556000  | -1.901986000 | -1.101922000 |
| F  | -2.880458000 | 4.367592000  | -3.410656000 |
| F  | 2.831178000  | 5.132205000  | -2.116541000 |
| F  | -2.850794000 | -3.913256000 | -3.963932000 |
| F  | 2.792153000  | -3.770334000 | -4.006718000 |
| C  | -0.715874000 | -0.311782000 | -4.754709000 |
| C  | 0.385785000  | -1.050736000 | -4.291328000 |
| C  | 1.747672000  | -0.800067000 | -4.875717000 |
| H  | 2.049019000  | -1.710841000 | -5.426641000 |
| H  | -0.701004000 | 0.101812000  | -5.771594000 |
| H  | 1.686426000  | 0.028511000  | -5.603082000 |
| H  | 3.538074000  | -0.374927000 | -4.196790000 |
| H  | -1.867397000 | -1.406732000 | -3.678369000 |
| H  | -0.302090000 | 0.716390000  | -4.032541000 |
| O  | 2.657478000  | -0.516034000 | -3.832234000 |
| O  | 0.250834000  | -1.801094000 | -3.282376000 |
| O  | -1.966889000 | -0.678512000 | -4.323474000 |
| C  | -3.723006000 | 0.915218000  | -5.398587000 |
| C  | -4.825831000 | 0.298354000  | -4.574616000 |
| C  | -6.054899000 | 1.184393000  | -4.583962000 |
| H  | -3.415846000 | 0.292462000  | -6.279537000 |
| H  | -7.781904000 | 1.136395000  | -3.702337000 |
| H  | -6.450148000 | 1.239038000  | -5.618221000 |
| H  | -5.767987000 | 2.206853000  | -4.280104000 |
| H  | -5.844396000 | -1.327907000 | -4.577177000 |

|   |              |              |              |
|---|--------------|--------------|--------------|
| H | -4.454799000 | 0.250483000  | -3.525815000 |
| O | -3.235773000 | 1.993327000  | -5.163806000 |
| O | -6.986219000 | 0.595208000  | -3.705684000 |
| O | -5.103136000 | -0.975073000 | -5.088471000 |

## Hf-NU-1000 (-F) Prod

|   |              |              |              |
|---|--------------|--------------|--------------|
| C | -3.248311000 | -2.182821000 | -1.650063000 |
| C | -3.229666000 | -2.386625000 | 2.899972000  |
| C | -3.232277000 | 2.034295000  | 3.104012000  |
| C | 3.276906000  | 2.142007000  | 2.939220000  |
| C | 3.226918000  | 2.366311000  | -1.338686000 |
| C | 3.259354000  | -2.277905000 | -1.561501000 |
| C | -3.265329000 | 2.236142000  | -1.457370000 |
| C | 3.257205000  | -2.506602000 | 2.716416000  |
| H | 4.087811000  | 2.690608000  | 3.466023000  |
| H | 4.060966000  | -3.138163000 | 3.156024000  |
| H | -4.031876000 | 2.544692000  | 3.684988000  |
| H | -4.030767000 | -2.970487000 | 3.403148000  |
| C | 5.679721000  | -2.858075000 | -1.782318000 |
| C | -5.667770000 | -2.553662000 | -2.175007000 |
| C | 4.372030000  | -2.968485000 | -2.281785000 |
| C | -4.329415000 | -2.948546000 | -2.335484000 |
| C | 4.196886000  | -3.733334000 | -3.442647000 |
| C | -4.083348000 | -4.048973000 | -3.169941000 |
| C | 5.257212000  | -4.368831000 | -4.078503000 |
| C | -5.107333000 | -4.713140000 | -3.836432000 |
| C | 6.539201000  | -4.250065000 | -3.550053000 |
| C | -6.419318000 | -4.281976000 | -3.674117000 |
| C | 6.752203000  | -3.492293000 | -2.397532000 |
| C | -6.703304000 | -3.201876000 | -2.835289000 |
| C | 5.569261000  | 2.699424000  | -2.144323000 |
| C | -5.615419000 | 3.076011000  | -1.489342000 |
| C | 4.288311000  | 3.227765000  | -1.929965000 |
| C | -4.345608000 | 3.043235000  | -2.084805000 |
| C | 4.069184000  | 4.562062000  | -2.296850000 |
| C | -4.161736000 | 3.785798000  | -3.260099000 |
| C | 5.069062000  | 5.340714000  | -2.867630000 |
| C | -5.188764000 | 4.540147000  | -3.816303000 |
| C | 6.324607000  | 4.781641000  | -3.089989000 |
| C | -6.432598000 | 4.568053000  | -3.192607000 |
| C | 6.577921000  | 3.457945000  | -2.726953000 |
| C | -6.648800000 | 3.834698000  | -2.024707000 |
| H | 5.821398000  | -2.256124000 | -0.882993000 |
| H | -5.868729000 | -1.707439000 | -1.516597000 |
| H | 5.057570000  | -4.946192000 | -4.982407000 |
| H | -4.851432000 | -5.559090000 | -4.475385000 |

|   |              |              |              |
|---|--------------|--------------|--------------|
| H | 7.756226000  | -3.395076000 | -1.980820000 |
| H | -7.732825000 | -2.866405000 | -2.698605000 |
| H | 5.741958000  | 1.664045000  | -1.844361000 |
| H | -5.762277000 | 2.487150000  | -0.581690000 |
| H | 4.845785000  | 6.377134000  | -3.124684000 |
| H | -4.993744000 | 5.090394000  | -4.737828000 |
| H | 7.563323000  | 3.020241000  | -2.896342000 |
| H | -7.624499000 | 3.852510000  | -1.536006000 |
| H | -7.224485000 | -4.796991000 | -4.202582000 |
| H | 7.373924000  | -4.751201000 | -4.044944000 |
| H | -7.238345000 | 5.163922000  | -3.627028000 |
| H | 7.110340000  | 5.389343000  | -3.544238000 |
| H | -1.925533000 | -2.936011000 | 0.580108000  |
| H | -0.874602000 | 1.354693000  | 5.080872000  |
| H | -0.011142000 | 0.055545000  | 4.774782000  |
| H | 0.052601000  | 4.025453000  | 0.571307000  |
| H | 0.654789000  | 4.299113000  | 2.660463000  |
| H | 0.849645000  | 4.353416000  | -0.770930000 |
| H | 1.966169000  | -0.193813000 | 3.562017000  |
| H | -1.918200000 | 2.810532000  | 0.831321000  |
| H | -0.599277000 | -2.024602000 | 5.077760000  |
| H | 0.893382000  | -4.450301000 | 2.103962000  |
| H | 0.645303000  | -4.404834000 | -1.244056000 |
| H | 0.030697000  | -4.131961000 | 0.806317000  |
| O | -1.057274000 | -0.101171000 | 2.179363000  |
| O | -3.619424000 | 1.295174000  | 2.159547000  |
| O | -3.630718000 | 1.333432000  | -0.634801000 |
| O | -3.609870000 | -1.507540000 | 2.083141000  |
| O | -2.045809000 | -2.667953000 | 3.212160000  |
| O | 0.044357000  | -4.079649000 | 1.826538000  |
| O | 2.073194000  | -2.843128000 | 2.970857000  |
| O | 2.071074000  | -2.582252000 | -1.845859000 |
| O | 3.634811000  | -1.531243000 | 2.019033000  |
| O | 3.608912000  | -1.427318000 | -0.694578000 |
| O | 3.642810000  | 1.287708000  | 2.093237000  |
| O | 3.613294000  | 1.370381000  | -0.654563000 |
| O | 2.027274000  | 2.669936000  | -1.556789000 |
| O | 2.098191000  | 2.442222000  | 3.255638000  |
| O | 1.075211000  | 1.406396000  | 0.740094000  |
| O | 1.413594000  | -0.132293000 | 2.773097000  |
| O | 0.042688000  | -1.537265000 | 4.549808000  |
| O | -0.025902000 | 1.073082000  | 4.712550000  |
| O | 1.065139000  | -1.542401000 | 0.671221000  |
| O | -1.396690000 | -2.131472000 | 0.648115000  |
| O | -2.056108000 | -2.367698000 | -2.000750000 |
| O | -0.025192000 | -3.897788000 | -0.772980000 |

|    |              |              |              |
|----|--------------|--------------|--------------|
| O  | -3.619591000 | -1.372572000 | -0.739092000 |
| O  | -0.002394000 | 3.780840000  | 2.183124000  |
| O  | 0.030222000  | 3.956780000  | -0.440367000 |
| O  | -1.388838000 | 2.005334000  | 0.774420000  |
| O  | -2.047957000 | 2.245995000  | 3.459670000  |
| O  | -2.073963000 | 2.492418000  | -1.756289000 |
| O  | 1.368669000  | -0.014403000 | -1.360903000 |
| O  | -1.093714000 | -0.027194000 | -0.785080000 |
| H  | 1.869044000  | -0.005795000 | -2.203323000 |
| O  | 0.048979000  | 1.676342000  | -3.151535000 |
| H  | -0.708001000 | 1.970341000  | -3.670054000 |
| Hf | 2.527341000  | -0.061877000 | 0.681254000  |
| Hf | -0.010249000 | -1.876448000 | 2.476754000  |
| Hf | 0.045074000  | 1.710538000  | 2.506639000  |
| Hf | -0.024404000 | 1.749986000  | -1.080776000 |
| Hf | -2.522210000 | -0.062303000 | 0.719423000  |
| Hf | 0.017417000  | -1.813212000 | -1.100625000 |
| F  | -2.994059000 | 3.764640000  | -3.907120000 |
| F  | 2.886298000  | 5.147585000  | -2.067318000 |
| F  | -2.843743000 | -4.513359000 | -3.339501000 |
| F  | 2.984240000  | -3.863754000 | -4.000248000 |
| C  | 0.274907000  | -2.759239000 | -5.427534000 |
| C  | 0.657397000  | -1.667829000 | -4.473913000 |
| C  | 1.724009000  | -0.701440000 | -4.891319000 |
| H  | 2.610114000  | -1.318567000 | -5.136072000 |
| H  | 1.125417000  | -3.473778000 | -5.405008000 |
| H  | 1.392984000  | -0.276338000 | -5.859654000 |
| H  | 1.289258000  | 0.880248000  | -3.822409000 |
| H  | -1.082159000 | -3.330880000 | -4.170705000 |
| H  | 0.247079000  | -2.360181000 | -6.453506000 |
| O  | 2.071727000  | 0.260301000  | -3.966851000 |
| O  | 0.121837000  | -1.646994000 | -3.369368000 |
| O  | -0.938294000 | -3.358188000 | -5.132597000 |
| C  | -2.270850000 | -0.824363000 | -6.008406000 |
| C  | -3.252559000 | -0.991441000 | -4.889165000 |
| C  | -3.272512000 | 0.196252000  | -3.924814000 |
| H  | -2.617184000 | -1.252488000 | -6.985589000 |
| H  | -4.296833000 | 0.111270000  | -2.247239000 |
| H  | -3.230101000 | 1.144356000  | -4.493179000 |
| H  | -2.383576000 | 0.164637000  | -3.269731000 |
| H  | -5.139656000 | -1.118753000 | -4.708011000 |
| H  | -2.875320000 | -1.880227000 | -4.335227000 |
| O  | -1.190133000 | -0.290295000 | -5.895859000 |
| O  | -4.480599000 | 0.141382000  | -3.197907000 |
| O  | -4.515043000 | -1.237062000 | -5.439361000 |



4.3 -CH<sub>3</sub>Hf-NU-1000 (-CH<sub>3</sub>)

|   |              |              |              |
|---|--------------|--------------|--------------|
| C | -3.248200000 | -2.182800000 | -1.650100000 |
| C | -3.229700000 | -2.386600000 | 2.900000000  |
| C | -3.232300000 | 2.034300000  | 3.104000000  |
| C | 3.276900000  | 2.142000000  | 2.939200000  |
| C | 3.226900000  | 2.366300000  | -1.338700000 |
| C | 3.259300000  | -2.277900000 | -1.561500000 |
| C | -3.265300000 | 2.236100000  | -1.457300000 |
| C | 3.257200000  | -2.506600000 | 2.716400000  |
| H | 4.086617000  | 2.685633000  | 3.472621000  |
| H | 4.063472000  | -3.157106000 | 3.122082000  |
| H | -4.031806000 | 2.545073000  | 3.684455000  |
| H | -4.030274000 | -2.992662000 | 3.377237000  |
| C | 5.650624000  | -2.839767000 | -1.765647000 |
| C | -5.622733000 | -2.461838000 | -2.256163000 |
| C | 4.347573000  | -3.014969000 | -2.260786000 |
| C | -4.297022000 | -2.890522000 | -2.430331000 |
| C | 4.125810000  | -3.865333000 | -3.373387000 |
| C | -4.009896000 | -3.961146000 | -3.313253000 |
| C | 5.242342000  | -4.503146000 | -3.932373000 |
| C | -5.089959000 | -4.546590000 | -3.989256000 |
| C | 6.527658000  | -4.329876000 | -3.427595000 |
| C | -6.398819000 | -4.103387000 | -3.822948000 |
| C | 6.736560000  | -3.491353000 | -2.334368000 |
| C | -6.671051000 | -3.051849000 | -2.949479000 |
| C | 5.596817000  | 3.063085000  | -1.439435000 |
| C | -5.670598000 | 2.607593000  | -1.890940000 |
| C | 4.299268000  | 3.191010000  | -1.958694000 |
| C | -4.349007000 | 3.036735000  | -2.092677000 |
| C | 4.048112000  | 4.075235000  | -3.036983000 |
| C | -4.093246000 | 4.194198000  | -2.870998000 |
| C | 5.137294000  | 4.801703000  | -3.539483000 |
| C | -5.199632000 | 4.861478000  | -3.416419000 |
| C | 6.417554000  | 4.684209000  | -3.005681000 |
| C | -6.505028000 | 4.420087000  | -3.221304000 |
| C | 6.652967000  | 3.809405000  | -1.946143000 |
| C | -6.746085000 | 3.283480000  | -2.451609000 |
| H | 5.785773000  | -2.173650000 | -0.912288000 |
| H | -5.805874000 | -1.643609000 | -1.558016000 |
| H | 5.089327000  | -5.156150000 | -4.795938000 |
| H | -4.888265000 | -5.380799000 | -4.666926000 |
| H | 7.739846000  | -3.343694000 | -1.929648000 |
| H | -7.694001000 | -2.697269000 | -2.807213000 |
| H | 5.751555000  | 2.360984000  | -0.617973000 |

|   |              |              |              |
|---|--------------|--------------|--------------|
| H | -5.829534000 | 1.720243000  | -1.276597000 |
| H | 4.967277000  | 5.478414000  | -4.381579000 |
| H | -5.021262000 | 5.760365000  | -4.013081000 |
| H | 7.654085000  | 3.705729000  | -1.522374000 |
| H | -7.765645000 | 2.928678000  | -2.287034000 |
| H | -7.208984000 | -4.586217000 | -4.374946000 |
| H | 7.367950000  | -4.849954000 | -3.893826000 |
| H | -7.336177000 | 4.970274000  | -3.669304000 |
| H | 7.235808000  | 5.274728000  | -3.425196000 |
| H | -1.933392000 | -2.946392000 | 0.622385000  |
| H | -0.872462000 | 1.405884000  | 5.083239000  |
| H | -0.012158000 | 0.101779000  | 4.804644000  |
| H | 0.011135000  | 4.019623000  | 0.574413000  |
| H | 0.654151000  | 4.301601000  | 2.643620000  |
| H | 0.866464000  | 4.307955000  | -0.725457000 |
| H | 1.960937000  | -0.173563000 | 3.587556000  |
| H | -1.942950000 | 2.793687000  | 0.835584000  |
| H | -0.605411000 | -1.987816000 | 5.138200000  |
| H | 0.897098000  | -4.436466000 | 2.198151000  |
| H | 0.713302000  | -4.421388000 | -1.139024000 |
| H | 0.031412000  | -4.153032000 | 0.900607000  |
| O | -1.064758000 | -0.101125000 | 2.191429000  |
| O | -3.618502000 | 1.286215000  | 2.168249000  |
| O | -3.611733000 | 1.333450000  | -0.630034000 |
| O | -3.607042000 | -1.507546000 | 2.086662000  |
| O | -2.048946000 | -2.649361000 | 3.245838000  |
| O | 0.044341000  | -4.079097000 | 1.913547000  |
| O | 2.076107000  | -2.827217000 | 3.002223000  |
| O | 2.043920000  | -2.537445000 | -1.863228000 |
| O | 3.631123000  | -1.525522000 | 2.025034000  |
| O | 3.590878000  | -1.429581000 | -0.686758000 |
| O | 3.650255000  | 1.284659000  | 2.096561000  |
| O | 3.586653000  | 1.355774000  | -0.649869000 |
| O | 2.025361000  | 2.697913000  | -1.513158000 |
| O | 2.098430000  | 2.448304000  | 3.240468000  |
| O | 1.067917000  | 1.379544000  | 0.734089000  |
| O | 1.410384000  | -0.122173000 | 2.796388000  |
| O | 0.035102000  | -1.510372000 | 4.599397000  |
| O | -0.024946000 | 1.114064000  | 4.719466000  |
| O | 1.070968000  | -1.550838000 | 0.712710000  |
| O | -1.387605000 | -2.154098000 | 0.700681000  |
| O | -2.022327000 | -2.343052000 | -1.966289000 |
| O | 0.000152000  | -3.934903000 | -0.711096000 |
| O | -3.620192000 | -1.436564000 | -0.691837000 |
| O | -0.005600000 | 3.781661000  | 2.171803000  |
| O | 0.006736000  | 3.966903000  | -0.441119000 |

|    |              |              |              |
|----|--------------|--------------|--------------|
| O  | -1.394927000 | 2.001584000  | 0.775698000  |
| O  | -2.047153000 | 2.255473000  | 3.454601000  |
| O  | -2.068467000 | 2.482086000  | -1.767193000 |
| O  | 1.328926000  | -0.042810000 | -1.417165000 |
| O  | -1.074112000 | -0.048756000 | -0.749482000 |
| H  | 1.878484000  | 0.031433000  | -2.207197000 |
| O  | 0.096645000  | 1.699265000  | -3.132846000 |
| H  | -0.695125000 | 1.849908000  | -3.657505000 |
| C  | -2.729701000 | 4.756638000  | -3.130154000 |
| H  | -2.162513000 | 4.923937000  | -2.205106000 |
| H  | -2.107188000 | 4.076703000  | -3.728014000 |
| H  | -2.807382000 | 5.709137000  | -3.670194000 |
| C  | 2.707806000  | 4.255462000  | -3.681032000 |
| H  | 2.197825000  | 3.305259000  | -3.885782000 |
| H  | 2.013560000  | 4.814362000  | -3.035675000 |
| H  | 2.807948000  | 4.816776000  | -4.619099000 |
| C  | 2.788126000  | -4.113205000 | -3.999267000 |
| H  | 2.096225000  | -4.623095000 | -3.314951000 |
| H  | 2.283711000  | -3.181692000 | -4.287237000 |
| H  | 2.895689000  | -4.736614000 | -4.896019000 |
| C  | -2.638508000 | -4.512732000 | -3.550281000 |
| H  | -2.000429000 | -3.796543000 | -4.086964000 |
| H  | -2.106568000 | -4.733399000 | -2.615615000 |
| H  | -2.695192000 | -5.430696000 | -4.149762000 |
| Hf | 2.537563000  | -0.051457000 | 0.699804000  |
| Hf | -0.023561000 | -1.859405000 | 2.537570000  |
| Hf | 0.034014000  | 1.710684000  | 2.498048000  |
| Hf | -0.043271000 | 1.751306000  | -1.101302000 |
| Hf | -2.541206000 | -0.063100000 | 0.711795000  |
| Hf | 0.021359000  | -1.846099000 | -0.993248000 |

Hf-NU-1000 (-CH<sub>3</sub>) Ads

|   |              |              |              |
|---|--------------|--------------|--------------|
| C | -3.248200000 | -2.182800000 | -1.650100000 |
| C | -3.229700000 | -2.386600000 | 2.900000000  |
| C | -3.232300000 | 2.034300000  | 3.104000000  |
| C | 3.276900000  | 2.142000000  | 2.939200000  |
| C | 3.226900000  | 2.366300000  | -1.338700000 |
| C | 3.259300000  | -2.277900000 | -1.561500000 |
| C | -3.265300000 | 2.236100000  | -1.457300000 |
| C | 3.257200000  | -2.506600000 | 2.716400000  |
| H | 4.086407000  | 2.705396000  | 3.453047000  |
| H | 4.063495000  | -3.149737000 | 3.133567000  |
| H | -4.033233000 | 2.559493000  | 3.669431000  |
| H | -4.035009000 | -2.977460000 | 3.388436000  |
| C | 5.488798000  | -2.110214000 | -2.596145000 |
| C | -5.391841000 | -1.716465000 | -2.756186000 |

|   |              |              |              |
|---|--------------|--------------|--------------|
| C | 4.326985000  | -2.874218000 | -2.411056000 |
| C | -4.348634000 | -2.634545000 | -2.549387000 |
| C | 4.190238000  | -4.127689000 | -3.052836000 |
| C | -4.356090000 | -3.879929000 | -3.214143000 |
| C | 5.245880000  | -4.555637000 | -3.868789000 |
| C | -5.420182000 | -4.140898000 | -4.089446000 |
| C | 6.386979000  | -3.781696000 | -4.066575000 |
| C | -6.431214000 | -3.213492000 | -4.318486000 |
| C | 6.511961000  | -2.549593000 | -3.427529000 |
| C | -6.420924000 | -1.990440000 | -3.647059000 |
| C | 5.578684000  | 3.116495000  | -1.430715000 |
| C | -5.670484000 | 2.600171000  | -1.876320000 |
| C | 4.289599000  | 3.189675000  | -1.980725000 |
| C | -4.347730000 | 2.984623000  | -2.152725000 |
| C | 4.043745000  | 4.018933000  | -3.102123000 |
| C | -4.096151000 | 4.039795000  | -3.066093000 |
| C | 5.125330000  | 4.749044000  | -3.614835000 |
| C | -5.206929000 | 4.651779000  | -3.664994000 |
| C | 6.396231000  | 4.686751000  | -3.050138000 |
| C | -6.512717000 | 4.256201000  | -3.391918000 |
| C | 6.628153000  | 3.864809000  | -1.948608000 |
| C | -6.750422000 | 3.222082000  | -2.488020000 |
| H | 5.559373000  | -1.149598000 | -2.081424000 |
| H | -5.358851000 | -0.769851000 | -2.211383000 |
| H | 5.165736000  | -5.530643000 | -4.357764000 |
| H | -5.446198000 | -5.104871000 | -4.605075000 |
| H | 7.402807000  | -1.935326000 | -3.573528000 |
| H | -7.212800000 | -1.256862000 | -3.813451000 |
| H | 5.731663000  | 2.455718000  | -0.575235000 |
| H | -5.826549000 | 1.793546000  | -1.158243000 |
| H | 4.957620000  | 5.383293000  | -4.489823000 |
| H | -5.030939000 | 5.468124000  | -4.370812000 |
| H | 7.621788000  | 3.803804000  | -1.499688000 |
| H | -7.770283000 | 2.905875000  | -2.258790000 |
| H | -7.236114000 | -3.450660000 | -5.018345000 |
| H | 7.184222000  | -4.148240000 | -4.717831000 |
| H | -7.346800000 | 4.761648000  | -3.884981000 |
| H | 7.209226000  | 5.278316000  | -3.478185000 |
| H | -1.916814000 | -2.940455000 | 0.607161000  |
| H | -0.879891000 | 1.343947000  | 5.117561000  |
| H | -0.014377000 | 0.044736000  | 4.807592000  |
| H | 0.021974000  | 4.012254000  | 0.629916000  |
| H | 0.653777000  | 4.288436000  | 2.682429000  |
| H | 0.902530000  | 4.298483000  | -0.657292000 |
| H | 1.968389000  | -0.197823000 | 3.588804000  |
| H | -1.939159000 | 2.783813000  | 0.834871000  |

|   |              |              |              |
|---|--------------|--------------|--------------|
| H | -0.611485000 | -2.024295000 | 5.104078000  |
| H | 0.898228000  | -4.459293000 | 2.174774000  |
| H | 0.622829000  | -4.455311000 | -1.213843000 |
| H | 0.037689000  | -4.164675000 | 0.870914000  |
| O | -1.056099000 | -0.105660000 | 2.198100000  |
| O | -3.613243000 | 1.286582000  | 2.166691000  |
| O | -3.609158000 | 1.344318000  | -0.618302000 |
| O | -3.604418000 | -1.506402000 | 2.083683000  |
| O | -2.049878000 | -2.663188000 | 3.231309000  |
| O | 0.048920000  | -4.095135000 | 1.889736000  |
| O | 2.076035000  | -2.838113000 | 2.987450000  |
| O | 2.052766000  | -2.592662000 | -1.797945000 |
| O | 3.632937000  | -1.523919000 | 2.029845000  |
| O | 3.613765000  | -1.436826000 | -0.686292000 |
| O | 3.646751000  | 1.281502000  | 2.103061000  |
| O | 3.598728000  | 1.401150000  | -0.606221000 |
| O | 2.014941000  | 2.671220000  | -1.547598000 |
| O | 2.098627000  | 2.436166000  | 3.263753000  |
| O | 1.070559000  | 1.399560000  | 0.773264000  |
| O | 1.413113000  | -0.134801000 | 2.801912000  |
| O | 0.036868000  | -1.540903000 | 4.580169000  |
| O | -0.031963000 | 1.064130000  | 4.745936000  |
| O | 1.072007000  | -1.547480000 | 0.699440000  |
| O | -1.372360000 | -2.147873000 | 0.686285000  |
| O | -2.056039000 | -2.516987000 | -1.915304000 |
| O | -0.023407000 | -3.949569000 | -0.707823000 |
| O | -3.576551000 | -1.412959000 | -0.699794000 |
| O | -0.010064000 | 3.773113000  | 2.210980000  |
| O | 0.037844000  | 3.957032000  | -0.389754000 |
| O | -1.383895000 | 1.995346000  | 0.799231000  |
| O | -2.049400000 | 2.240402000  | 3.473961000  |
| O | -2.056653000 | 2.493045000  | -1.739760000 |
| O | 1.397811000  | -0.009392000 | -1.322466000 |
| O | -1.069248000 | -0.052080000 | -0.766004000 |
| H | 1.917282000  | -0.015495000 | -2.150926000 |
| O | 0.000919000  | 1.495968000  | -3.137006000 |
| H | -0.823220000 | 1.841231000  | -3.512808000 |
| C | -2.733561000 | 4.541712000  | -3.428868000 |
| H | -2.138184000 | 4.816365000  | -2.548242000 |
| H | -2.152890000 | 3.774523000  | -3.959477000 |
| H | -2.814011000 | 5.417472000  | -4.085777000 |
| C | 2.715023000  | 4.137133000  | -3.783856000 |
| H | 2.249063000  | 3.161808000  | -3.973186000 |
| H | 1.983953000  | 4.689365000  | -3.175136000 |
| H | 2.820488000  | 4.668164000  | -4.738752000 |
| C | 3.003707000  | -5.023228000 | -2.870463000 |

|    |              |              |              |
|----|--------------|--------------|--------------|
| H  | 2.764681000  | -5.164841000 | -1.806468000 |
| H  | 2.092359000  | -4.616445000 | -3.332410000 |
| H  | 3.195318000  | -6.013045000 | -3.304147000 |
| C  | -3.305790000 | -4.932022000 | -3.029666000 |
| H  | -2.545224000 | -4.874460000 | -3.824918000 |
| H  | -2.779552000 | -4.867119000 | -2.070088000 |
| H  | -3.747742000 | -5.933999000 | -3.111911000 |
| Hf | 2.536487000  | -0.071494000 | 0.700388000  |
| Hf | -0.009635000 | -1.880581000 | 2.505793000  |
| Hf | 0.036075000  | 1.697588000  | 2.545157000  |
| Hf | -0.017723000 | 1.735794000  | -1.014623000 |
| Hf | -2.520533000 | -0.072040000 | 0.723946000  |
| Hf | 0.038429000  | -1.865067000 | -1.065450000 |
| C  | -1.754366000 | -2.452275000 | -5.187578000 |
| C  | -0.310731000 | -2.814303000 | -4.792857000 |
| C  | 0.307394000  | -1.441995000 | -4.528745000 |
| C  | -1.665228000 | -0.997700000 | -5.666282000 |
| C  | 1.814206000  | -1.279381000 | -4.645603000 |
| C  | -2.539617000 | -0.005204000 | -4.918065000 |
| H  | 2.308924000  | -2.133585000 | -4.163315000 |
| H  | 0.204208000  | -3.266246000 | -5.662077000 |
| H  | -2.367825000 | -2.493300000 | -4.274199000 |
| H  | -1.235460000 | 1.301375000  | -5.420280000 |
| H  | 2.084084000  | -1.289797000 | -5.715943000 |
| H  | 1.655229000  | 0.623443000  | -4.175145000 |
| H  | -2.445051000 | -0.178540000 | -3.825518000 |
| H  | -3.598451000 | -0.166091000 | -5.175805000 |
| H  | -0.983812000 | -3.593867000 | -3.146540000 |
| H  | -0.116318000 | -0.035697000 | -3.192639000 |
| H  | -1.847987000 | -3.362465000 | -6.894252000 |
| H  | -1.871588000 | -0.927302000 | -6.747935000 |
| O  | -2.365484000 | -3.342775000 | -6.080134000 |
| O  | 2.272749000  | -0.110675000 | -4.001124000 |
| O  | -2.190634000 | 1.315713000  | -5.258566000 |
| O  | -0.134815000 | -1.063059000 | -3.238024000 |
| O  | -0.196003000 | -3.694735000 | -3.713721000 |
| O  | -0.286650000 | -0.606659000 | -5.494459000 |

Hf-NU-1000 (-CH<sub>3</sub>) TS1

|   |              |              |              |
|---|--------------|--------------|--------------|
| C | -3.248200000 | -2.182800000 | -1.650100000 |
| C | -3.229700000 | -2.386600000 | 2.900000000  |
| C | -3.232300000 | 2.034300000  | 3.104000000  |
| C | 3.276900000  | 2.142000000  | 2.939200000  |
| C | 3.226900000  | 2.366300000  | -1.338700000 |
| C | 3.259300000  | -2.277900000 | -1.561500000 |
| C | -3.265300000 | 2.236100000  | -1.457300000 |

|   |              |              |              |
|---|--------------|--------------|--------------|
| C | 3.257200000  | -2.506600000 | 2.716400000  |
| H | 4.086277000  | 2.708634000  | 3.449805000  |
| H | 4.063084000  | -3.145748000 | 3.140316000  |
| H | -4.032575000 | 2.563095000  | 3.666998000  |
| H | -4.034522000 | -2.975028000 | 3.392214000  |
| C | 5.492209000  | -2.122681000 | -2.592692000 |
| C | -5.396423000 | -1.733048000 | -2.754946000 |
| C | 4.329203000  | -2.883362000 | -2.402303000 |
| C | -4.349651000 | -2.645694000 | -2.542830000 |
| C | 4.193742000  | -4.144307000 | -3.029411000 |
| C | -4.354640000 | -3.896602000 | -3.197182000 |
| C | 5.251594000  | -4.582640000 | -3.837054000 |
| C | -5.419664000 | -4.168197000 | -4.068085000 |
| C | 6.393870000  | -3.811970000 | -4.040410000 |
| C | -6.434355000 | -3.246156000 | -4.302521000 |
| C | 6.517738000  | -2.572524000 | -3.415445000 |
| C | -6.426694000 | -2.017689000 | -3.641086000 |
| C | 5.583160000  | 3.098708000  | -1.428361000 |
| C | -5.666439000 | 2.581173000  | -1.910690000 |
| C | 4.290277000  | 3.201664000  | -1.965580000 |
| C | -4.343666000 | 2.984808000  | -2.158007000 |
| C | 4.046006000  | 4.071231000  | -3.056891000 |
| C | -4.088597000 | 4.058611000  | -3.048073000 |
| C | 5.131738000  | 4.806260000  | -3.553648000 |
| C | -5.195501000 | 4.667891000  | -3.656668000 |
| C | 6.406556000  | 4.710710000  | -3.002952000 |
| C | -6.501044000 | 4.251699000  | -3.414655000 |
| C | 6.637261000  | 3.850761000  | -1.930730000 |
| C | -6.742499000 | 3.200186000  | -2.532074000 |
| H | 5.561776000  | -1.156121000 | -2.089132000 |
| H | -5.365016000 | -0.782008000 | -2.217955000 |
| H | 5.172152000  | -5.563301000 | -4.314720000 |
| H | -5.443551000 | -5.136488000 | -4.575656000 |
| H | 7.409632000  | -1.960778000 | -3.565776000 |
| H | -7.221420000 | -1.288164000 | -3.811696000 |
| H | 5.735400000  | 2.410536000  | -0.594848000 |
| H | -5.825787000 | 1.762039000  | -1.207697000 |
| H | 4.963775000  | 5.472351000  | -4.404550000 |
| H | -5.016861000 | 5.499099000  | -4.344229000 |
| H | 7.633425000  | 3.763755000  | -1.491874000 |
| H | -7.762447000 | 2.868352000  | -2.326605000 |
| H | -7.239942000 | -3.491725000 | -4.998680000 |
| H | 7.192885000  | -4.186767000 | -4.684774000 |
| H | -7.332183000 | 4.755244000  | -3.914560000 |
| H | 7.222712000  | 5.306884000  | -3.418303000 |
| H | -1.915490000 | -2.939453000 | 0.601234000  |

|   |              |              |              |
|---|--------------|--------------|--------------|
| H | -0.878853000 | 1.328065000  | 5.126084000  |
| H | -0.014575000 | 0.028800000  | 4.804585000  |
| H | 0.027261000  | 4.007732000  | 0.643488000  |
| H | 0.655432000  | 4.282472000  | 2.690410000  |
| H | 0.916790000  | 4.290999000  | -0.638962000 |
| H | 1.966977000  | -0.204507000 | 3.586503000  |
| H | -1.936876000 | 2.787099000  | 0.838417000  |
| H | -0.609719000 | -2.033926000 | 5.091785000  |
| H | 0.895203000  | -4.463447000 | 2.162880000  |
| H | 0.606305000  | -4.453326000 | -1.225498000 |
| H | 0.038271000  | -4.159886000 | 0.855782000  |
| O | -1.057383000 | -0.106130000 | 2.198615000  |
| O | -3.613723000 | 1.287199000  | 2.166758000  |
| O | -3.611014000 | 1.347005000  | -0.617774000 |
| O | -3.606734000 | -1.505592000 | 2.084993000  |
| O | -2.049484000 | -2.665956000 | 3.225255000  |
| O | 0.047746000  | -4.095572000 | 1.877563000  |
| O | 2.075740000  | -2.840509000 | 2.980896000  |
| O | 2.055018000  | -2.594758000 | -1.794935000 |
| O | 3.634399000  | -1.525104000 | 2.028391000  |
| O | 3.615564000  | -1.430445000 | -0.691347000 |
| O | 3.645621000  | 1.281286000  | 2.103369000  |
| O | 3.596613000  | 1.408632000  | -0.599440000 |
| O | 2.011396000  | 2.658428000  | -1.567402000 |
| O | 2.098415000  | 2.433413000  | 3.267716000  |
| O | 1.069434000  | 1.402712000  | 0.777647000  |
| O | 1.413084000  | -0.137807000 | 2.798923000  |
| O | 0.038640000  | -1.547777000 | 4.570450000  |
| O | -0.032503000 | 1.050470000  | 4.749450000  |
| O | 1.069340000  | -1.544108000 | 0.690216000  |
| O | -1.375367000 | -2.143818000 | 0.678936000  |
| O | -2.056934000 | -2.513802000 | -1.917356000 |
| O | -0.026998000 | -3.942203000 | -0.708583000 |
| O | -3.577609000 | -1.407403000 | -0.704203000 |
| O | -0.010280000 | 3.769976000  | 2.218393000  |
| O | 0.049104000  | 3.952783000  | -0.377647000 |
| O | -1.383852000 | 1.996949000  | 0.805350000  |
| O | -2.049610000 | 2.236575000  | 3.477542000  |
| O | -2.052879000 | 2.491102000  | -1.736930000 |
| O | 1.404289000  | -0.002541000 | -1.314692000 |
| O | -1.068079000 | -0.047357000 | -0.757126000 |
| H | 1.914484000  | -0.018848000 | -2.148598000 |
| O | -0.037316000 | 1.374675000  | -3.141077000 |
| H | -0.864923000 | 1.693470000  | -3.537754000 |
| C | -2.725775000 | 4.585900000  | -3.371629000 |
| H | -2.154772000 | 4.851411000  | -2.472219000 |



|    |              |              |              |
|----|--------------|--------------|--------------|
| H  | -2.120484000 | 3.837903000  | -3.901449000 |
| H  | -2.804036000 | 5.473789000  | -4.012300000 |
| C  | 2.714612000  | 4.233180000  | -3.724420000 |
| H  | 2.246214000  | 3.271459000  | -3.969214000 |
| H  | 1.987677000  | 4.752063000  | -3.082762000 |
| H  | 2.818099000  | 4.816975000  | -4.648165000 |
| C  | 3.006179000  | -5.036875000 | -2.839527000 |
| H  | 2.765351000  | -5.166928000 | -1.774453000 |
| H  | 2.095603000  | -4.634074000 | -3.306506000 |
| H  | 3.197473000  | -6.031273000 | -3.262739000 |
| C  | -3.301271000 | -4.944368000 | -3.005852000 |
| H  | -2.542766000 | -4.891911000 | -3.803438000 |
| H  | -2.773518000 | -4.869891000 | -2.047757000 |
| H  | -3.740934000 | -5.948125000 | -3.077976000 |
| Hf | 2.535688000  | -0.078646000 | 0.699708000  |
| Hf | -0.008616000 | -1.884796000 | 2.492209000  |
| Hf | 0.034251000  | 1.692663000  | 2.554439000  |
| Hf | -0.016127000 | 1.729507000  | -0.994489000 |
| Hf | -2.523256000 | -0.075312000 | 0.726635000  |
| Hf | 0.034701000  | -1.859233000 | -1.093758000 |
| C  | -1.728605000 | -2.490163000 | -5.169571000 |
| C  | -0.291732000 | -2.846683000 | -4.752565000 |
| C  | 0.330534000  | -1.474440000 | -4.488144000 |
| C  | -1.630643000 | -1.038971000 | -5.657490000 |
| C  | 1.841202000  | -1.346540000 | -4.630414000 |
| C  | -2.506432000 | -0.045551000 | -4.911117000 |
| H  | 2.324425000  | -2.204944000 | -4.146004000 |
| H  | 0.231211000  | -3.309601000 | -5.611762000 |
| H  | -2.358057000 | -2.524858000 | -4.267287000 |
| H  | -1.198746000 | 1.234813000  | -5.474922000 |
| H  | 2.102131000  | -1.370495000 | -5.702644000 |
| H  | 1.785231000  | 0.571498000  | -4.254888000 |
| H  | -2.425526000 | -0.228998000 | -3.819892000 |
| H  | -3.563957000 | -0.192643000 | -5.183358000 |
| H  | -0.987260000 | -3.619326000 | -3.112240000 |
| H  | -0.086880000 | 0.092918000  | -3.201667000 |
| H  | -1.784316000 | -3.424836000 | -6.864588000 |
| H  | -1.841706000 | -0.975870000 | -6.739014000 |
| O  | -2.325315000 | -3.387777000 | -6.066546000 |
| O  | 2.337582000  | -0.184365000 | -3.998153000 |
| O  | -2.134893000 | 1.278647000  | -5.228442000 |
| O  | -0.095126000 | -1.056658000 | -3.225991000 |
| O  | -0.189227000 | -3.718835000 | -3.663963000 |
| O  | -0.253735000 | -0.653005000 | -5.491858000 |

Hf-NU-1000 (-CH<sub>3</sub>) Int1

|   |              |              |              |
|---|--------------|--------------|--------------|
| C | -3.248200000 | -2.182800000 | -1.650100000 |
| C | -3.229700000 | -2.386600000 | 2.900000000  |
| C | -3.232300000 | 2.034300000  | 3.104000000  |
| C | 3.276900000  | 2.142000000  | 2.939200000  |
| C | 3.226900000  | 2.366300000  | -1.338700000 |
| C | 3.259300000  | -2.277900000 | -1.561500000 |
| C | -3.265300000 | 2.236100000  | -1.457300000 |
| C | 3.257200000  | -2.506600000 | 2.716400000  |
| H | 4.086795000  | 2.713452000  | 3.443828000  |
| H | 4.062910000  | -3.137200000 | 3.153237000  |
| H | -4.031332000 | 2.569761000  | 3.662445000  |
| H | -4.033386000 | -2.973426000 | 3.395985000  |
| C | 5.426840000  | -2.016925000 | -2.712782000 |
| C | -5.387398000 | -1.717466000 | -2.768258000 |
| C | 4.322297000  | -2.840353000 | -2.445698000 |
| C | -4.353421000 | -2.640808000 | -2.540860000 |
| C | 4.220788000  | -4.112793000 | -3.054557000 |
| C | -4.372100000 | -3.899741000 | -3.179011000 |
| C | 5.247132000  | -4.495575000 | -3.929219000 |
| C | -5.438481000 | -4.168646000 | -4.049267000 |
| C | 6.324523000  | -3.660632000 | -4.215528000 |
| C | -6.440153000 | -3.236713000 | -4.299343000 |
| C | 6.418809000  | -2.411252000 | -3.604142000 |
| C | -6.418424000 | -1.999668000 | -3.654338000 |
| C | 5.567828000  | 3.144318000  | -1.443183000 |
| C | -5.661091000 | 2.574511000  | -1.939325000 |
| C | 4.284419000  | 3.172291000  | -2.010666000 |
| C | -4.336389000 | 2.978814000  | -2.174954000 |
| C | 4.041158000  | 3.935430000  | -3.178510000 |
| C | -4.073342000 | 4.047699000  | -3.068689000 |
| C | 5.119975000  | 4.650558000  | -3.717927000 |
| C | -5.174640000 | 4.651639000  | -3.692623000 |
| C | 6.384442000  | 4.636358000  | -3.135461000 |
| C | -6.482056000 | 4.234572000  | -3.462266000 |
| C | 6.613779000  | 3.878065000  | -1.988496000 |
| C | -6.731301000 | 3.187921000  | -2.576129000 |
| H | 5.481479000  | -1.050409000 | -2.204032000 |
| H | -5.345784000 | -0.760486000 | -2.242693000 |
| H | 5.193212000  | -5.482900000 | -4.396436000 |
| H | -5.472916000 | -5.142920000 | -4.544646000 |
| H | 7.264979000  | -1.752951000 | -3.812176000 |
| H | -7.202979000 | -1.262034000 | -3.837272000 |
| H | 5.718817000  | 2.531326000  | -0.552251000 |
| H | -5.826740000 | 1.759016000  | -1.233574000 |
| H | 4.955042000  | 5.233647000  | -4.628330000 |
| H | -4.990096000 | 5.479530000  | -4.382655000 |

|   |              |              |              |
|---|--------------|--------------|--------------|
| H | 7.602489000  | 3.855207000  | -1.525407000 |
| H | -7.752793000 | 2.855288000  | -2.379994000 |
| H | -7.246627000 | -3.480846000 | -4.995071000 |
| H | 7.098351000  | -3.993162000 | -4.911588000 |
| H | -7.308562000 | 4.733750000  | -3.974063000 |
| H | 7.194835000  | 5.215363000  | -3.585076000 |
| H | -1.928290000 | -2.924770000 | 0.593902000  |
| H | -0.876095000 | 1.305573000  | 5.144622000  |
| H | -0.016190000 | 0.004854000  | 4.802886000  |
| H | 0.026565000  | 4.012031000  | 0.668669000  |
| H | 0.663772000  | 4.270704000  | 2.706417000  |
| H | 0.908050000  | 4.301998000  | -0.621223000 |
| H | 1.962963000  | -0.212167000 | 3.590038000  |
| H | -1.935377000 | 2.794020000  | 0.846461000  |
| H | -0.610745000 | -2.047145000 | 5.072913000  |
| H | 0.893667000  | -4.467786000 | 2.110465000  |
| H | 0.656128000  | -4.426983000 | -1.210709000 |
| H | 0.023370000  | -4.145843000 | 0.814180000  |
| O | -1.058314000 | -0.105109000 | 2.196168000  |
| O | -3.614327000 | 1.287992000  | 2.167293000  |
| O | -3.616030000 | 1.358169000  | -0.610370000 |
| O | -3.609637000 | -1.502099000 | 2.089846000  |
| O | -2.048382000 | -2.670766000 | 3.216158000  |
| O | 0.046303000  | -4.091063000 | 1.837420000  |
| O | 2.075585000  | -2.844649000 | 2.970858000  |
| O | 2.069935000  | -2.649102000 | -1.741231000 |
| O | 3.636924000  | -1.529241000 | 2.021945000  |
| O | 3.621640000  | -1.403016000 | -0.716650000 |
| O | 3.643879000  | 1.281059000  | 2.103167000  |
| O | 3.601103000  | 1.417980000  | -0.592368000 |
| O | 2.008517000  | 2.670323000  | -1.548686000 |
| O | 2.098964000  | 2.428840000  | 3.275085000  |
| O | 1.065534000  | 1.402803000  | 0.786094000  |
| O | 1.413867000  | -0.140742000 | 2.799505000  |
| O | 0.039285000  | -1.557018000 | 4.557339000  |
| O | -0.033833000 | 1.030173000  | 4.757719000  |
| O | 1.070405000  | -1.533141000 | 0.682058000  |
| O | -1.382391000 | -2.133297000 | 0.672223000  |
| O | -2.062843000 | -2.523711000 | -1.911798000 |
| O | -0.038328000 | -3.937393000 | -0.754941000 |
| O | -3.576837000 | -1.395518000 | -0.708427000 |
| O | -0.007911000 | 3.765051000  | 2.235285000  |
| O | 0.044093000  | 3.958203000  | -0.354253000 |
| O | -1.384130000 | 2.002385000  | 0.818270000  |
| O | -2.050016000 | 2.230039000  | 3.484333000  |
| O | -2.047995000 | 2.488648000  | -1.730699000 |

|    |              |              |              |
|----|--------------|--------------|--------------|
| O  | 1.400600000  | 0.014516000  | -1.329465000 |
| O  | -1.074910000 | -0.029614000 | -0.762542000 |
| H  | 1.888074000  | -0.052788000 | -2.173211000 |
| O  | -0.039199000 | 1.395367000  | -3.175517000 |
| H  | -0.864335000 | 1.600204000  | -3.667493000 |
| C  | -2.708086000 | 4.576879000  | -3.379960000 |
| H  | -2.147337000 | 4.846276000  | -2.475293000 |
| H  | -2.094231000 | 3.829996000  | -3.901764000 |
| H  | -2.781960000 | 5.463260000  | -4.023294000 |
| C  | 2.719442000  | 3.992014000  | -3.881264000 |
| H  | 2.276620000  | 2.997884000  | -4.026162000 |
| H  | 1.972654000  | 4.562740000  | -3.310298000 |
| H  | 2.827654000  | 4.473319000  | -4.861835000 |
| C  | 3.097346000  | -5.065615000 | -2.785135000 |
| H  | 2.915950000  | -5.182820000 | -1.707175000 |
| H  | 2.144354000  | -4.723940000 | -3.217830000 |
| H  | 3.322470000  | -6.057170000 | -3.197861000 |
| C  | -3.332275000 | -4.956360000 | -2.969885000 |
| H  | -2.560740000 | -4.911974000 | -3.754916000 |
| H  | -2.815056000 | -4.879300000 | -2.006259000 |
| H  | -3.781039000 | -5.956120000 | -3.041877000 |
| Hf | 2.535462000  | -0.086383000 | 0.698741000  |
| Hf | -0.008280000 | -1.887598000 | 2.472928000  |
| Hf | 0.030159000  | 1.685329000  | 2.572228000  |
| Hf | -0.016739000 | 1.734677000  | -0.957896000 |
| Hf | -2.529870000 | -0.078642000 | 0.725601000  |
| Hf | 0.022613000  | -1.846094000 | -1.128981000 |
| C  | -1.710525000 | -2.573088000 | -5.157045000 |
| C  | -0.285600000 | -3.016588000 | -4.807265000 |
| C  | 0.400864000  | -1.688884000 | -4.444710000 |
| C  | -1.534682000 | -1.117705000 | -5.609304000 |
| C  | 1.911245000  | -1.703672000 | -4.620812000 |
| C  | -2.377430000 | -0.115515000 | -4.840123000 |
| H  | 2.289173000  | -2.646468000 | -4.188806000 |
| H  | 0.197410000  | -3.426319000 | -5.715366000 |
| H  | -2.306689000 | -2.596054000 | -4.232791000 |
| H  | -1.111137000 | 1.133245000  | -5.587918000 |
| H  | 2.150014000  | -1.693935000 | -5.698103000 |
| H  | 3.434115000  | -0.625292000 | -4.069639000 |
| H  | -2.285677000 | -0.314466000 | -3.754380000 |
| H  | -3.441677000 | -0.222066000 | -5.107042000 |
| H  | -0.829017000 | -3.787409000 | -3.113458000 |
| H  | 0.075950000  | 0.408122000  | -3.301374000 |
| H  | -1.855031000 | -3.495623000 | -6.852343000 |
| H  | -1.751900000 | -1.024854000 | -6.689296000 |
| O  | -2.393620000 | -3.405432000 | -6.057085000 |

|   |              |              |              |
|---|--------------|--------------|--------------|
| O | 2.476002000  | -0.582265000 | -3.961579000 |
| O | -1.956204000 | 1.214663000  | -5.119756000 |
| O | 0.031454000  | -1.290567000 | -3.196889000 |
| O | -0.191203000 | -3.998067000 | -3.818467000 |
| O | -0.148663000 | -0.796357000 | -5.439173000 |

Hf-NU-1000 (-CH<sub>3</sub>) TS2

|   |              |              |              |
|---|--------------|--------------|--------------|
| C | -3.248200000 | -2.182800000 | -1.650100000 |
| C | -3.229700000 | -2.386600000 | 2.900000000  |
| C | -3.232300000 | 2.034300000  | 3.104000000  |
| C | 3.276900000  | 2.142000000  | 2.939200000  |
| C | 3.226900000  | 2.366300000  | -1.338700000 |
| C | 3.259300000  | -2.277900000 | -1.561500000 |
| C | -3.265300000 | 2.236100000  | -1.457300000 |
| C | 3.257200000  | -2.506600000 | 2.716400000  |
| H | 4.087782000  | 2.699081000  | 3.458062000  |
| H | 4.064807000  | -3.139272000 | 3.147279000  |
| H | -4.032737000 | 2.554118000  | 3.675619000  |
| H | -4.031747000 | -2.980523000 | 3.390618000  |
| C | 5.423638000  | -1.952098000 | -2.714141000 |
| C | -5.559063000 | -2.181370000 | -2.533592000 |
| C | 4.305020000  | -2.775814000 | -2.508499000 |
| C | -4.302062000 | -2.802229000 | -2.502142000 |
| C | 4.164962000  | -3.975306000 | -3.246780000 |
| C | -4.058437000 | -3.955389000 | -3.286390000 |
| C | 5.168919000  | -4.286125000 | -4.175124000 |
| C | -5.105885000 | -4.416564000 | -4.095852000 |
| C | 6.260925000  | -3.450121000 | -4.393758000 |
| C | -6.340500000 | -3.775174000 | -4.147418000 |
| C | 6.392464000  | -2.272540000 | -3.659324000 |
| C | -6.574407000 | -2.650252000 | -3.358047000 |
| C | 5.583165000  | 3.107435000  | -1.453664000 |
| C | -5.583152000 | 2.267555000  | -2.317951000 |
| C | 4.293751000  | 3.166847000  | -2.004118000 |
| C | -4.346364000 | 2.925154000  | -2.224917000 |
| C | 4.047788000  | 3.952669000  | -3.156199000 |
| C | -4.154151000 | 4.170777000  | -2.874523000 |
| C | 5.132425000  | 4.657170000  | -3.698729000 |
| C | -5.232610000 | 4.688610000  | -3.607134000 |
| C | 6.403905000  | 4.611623000  | -3.133350000 |
| C | -6.447197000 | 4.016415000  | -3.714977000 |
| C | 6.634866000  | 3.831817000  | -2.001037000 |
| C | -6.627823000 | 2.796270000  | -3.065438000 |
| H | 5.506823000  | -1.043479000 | -2.110822000 |
| H | -5.713362000 | -1.313340000 | -1.890194000 |
| H | 5.082673000  | -5.216114000 | -4.744026000 |

|   |              |              |              |
|---|--------------|--------------|--------------|
| H | -4.941148000 | -5.312618000 | -4.700909000 |
| H | 7.248918000  | -1.612885000 | -3.814250000 |
| H | -7.543574000 | -2.147030000 | -3.380329000 |
| H | 5.734242000  | 2.477648000  | -0.574366000 |
| H | -5.696620000 | 1.322656000  | -1.784192000 |
| H | 4.965826000  | 5.257745000  | -4.597500000 |
| H | -5.107358000 | 5.654218000  | -4.104640000 |
| H | 7.628908000  | 3.785408000  | -1.551066000 |
| H | -7.578405000 | 2.263599000  | -3.136330000 |
| H | -7.126536000 | -4.163968000 | -4.799525000 |
| H | 7.014909000  | -3.724812000 | -5.135259000 |
| H | -7.257500000 | 4.453156000  | -4.303596000 |
| H | 7.218625000  | 5.183481000  | -3.584538000 |
| H | -1.939277000 | -2.930663000 | 0.600038000  |
| H | -0.882199000 | 1.343014000  | 5.101167000  |
| H | -0.015633000 | 0.043295000  | 4.793863000  |
| H | 0.025936000  | 4.004809000  | 0.612730000  |
| H | 0.657679000  | 4.281601000  | 2.670976000  |
| H | 0.913303000  | 4.262599000  | -0.673486000 |
| H | 1.961444000  | -0.196397000 | 3.582027000  |
| H | -1.930895000 | 2.785011000  | 0.827902000  |
| H | -0.609215000 | -2.023253000 | 5.088184000  |
| H | 0.894558000  | -4.447703000 | 2.149056000  |
| H | 0.611177000  | -4.454658000 | -1.175755000 |
| H | 0.013071000  | -4.152052000 | 0.854923000  |
| O | -1.063561000 | -0.104530000 | 2.187969000  |
| O | -3.615616000 | 1.291395000  | 2.163054000  |
| O | -3.619991000 | 1.346500000  | -0.628504000 |
| O | -3.611406000 | -1.504022000 | 2.089630000  |
| O | -2.048596000 | -2.662832000 | 3.225005000  |
| O | 0.039333000  | -4.087517000 | 1.877432000  |
| O | 2.076211000  | -2.840471000 | 2.982378000  |
| O | 2.084402000  | -2.700309000 | -1.697190000 |
| O | 3.632188000  | -1.531362000 | 2.016917000  |
| O | 3.619371000  | -1.398659000 | -0.721603000 |
| O | 3.643785000  | 1.284274000  | 2.097716000  |
| O | 3.598266000  | 1.384059000  | -0.626665000 |
| O | 2.020617000  | 2.691956000  | -1.522835000 |
| O | 2.098518000  | 2.439139000  | 3.261157000  |
| O | 1.069201000  | 1.397575000  | 0.758362000  |
| O | 1.411838000  | -0.134059000 | 2.791175000  |
| O | 0.039094000  | -1.537656000 | 4.566319000  |
| O | -0.032404000 | 1.063570000  | 4.733650000  |
| O | 1.058263000  | -1.537212000 | 0.687605000  |
| O | -1.395422000 | -2.137251000 | 0.675629000  |
| O | -2.044889000 | -2.408771000 | -1.940933000 |

|    |              |              |              |
|----|--------------|--------------|--------------|
| O  | -0.059841000 | -3.946579000 | -0.707229000 |
| O  | -3.625782000 | -1.413626000 | -0.707408000 |
| O  | -0.011294000 | 3.771283000  | 2.201348000  |
| O  | 0.036774000  | 3.951309000  | -0.405247000 |
| O  | -1.385042000 | 1.990504000  | 0.790212000  |
| O  | -2.048930000 | 2.241962000  | 3.470353000  |
| O  | -2.067774000 | 2.545889000  | -1.709511000 |
| O  | 1.357706000  | -0.014579000 | -1.364155000 |
| O  | -1.095365000 | -0.041854000 | -0.788952000 |
| H  | 1.868926000  | -0.027421000 | -2.197003000 |
| O  | -0.036182000 | 1.748310000  | -3.168211000 |
| H  | -0.800559000 | 2.253275000  | -3.493263000 |
| C  | -2.884411000 | 4.962466000  | -2.806030000 |
| H  | -2.489173000 | 5.037773000  | -1.785431000 |
| H  | -2.078902000 | 4.499796000  | -3.394981000 |
| H  | -3.044006000 | 5.975654000  | -3.196103000 |
| C  | 2.716596000  | 4.043303000  | -3.836336000 |
| H  | 2.243259000  | 3.062787000  | -3.976989000 |
| H  | 1.992342000  | 4.624930000  | -3.247037000 |
| H  | 2.818630000  | 4.531854000  | -4.814127000 |
| C  | 3.019977000  | -4.926449000 | -3.079342000 |
| H  | 2.831091000  | -5.157269000 | -2.022305000 |
| H  | 2.078077000  | -4.516082000 | -3.473265000 |
| H  | 3.222219000  | -5.868924000 | -3.603985000 |
| C  | -2.771695000 | -4.720860000 | -3.261191000 |
| H  | -1.945218000 | -4.175357000 | -3.739724000 |
| H  | -2.415406000 | -4.908431000 | -2.239744000 |
| H  | -2.890050000 | -5.685482000 | -3.772959000 |
| Hf | 2.526186000  | -0.077934000 | 0.690365000  |
| Hf | -0.014224000 | -1.878033000 | 2.488844000  |
| Hf | 0.035043000  | 1.695268000  | 2.531207000  |
| Hf | -0.022207000 | 1.722598000  | -1.034501000 |
| Hf | -2.532282000 | -0.080858000 | 0.715537000  |
| Hf | 0.014763000  | -1.865643000 | -1.095934000 |
| C  | -1.578027000 | -1.677715000 | -5.360148000 |
| C  | -0.162503000 | -2.207803000 | -5.528505000 |
| C  | 0.628745000  | -1.520914000 | -4.426958000 |
| C  | -1.451792000 | -0.152550000 | -5.378159000 |
| C  | 2.082461000  | -1.242207000 | -4.705128000 |
| C  | -2.491433000 | 0.504353000  | -4.501430000 |
| H  | 2.585351000  | -2.228093000 | -4.629141000 |
| H  | 0.231655000  | -1.882634000 | -6.516234000 |
| H  | -1.936369000 | -2.017383000 | -4.372779000 |
| H  | -3.191202000 | 2.299657000  | -4.229732000 |
| H  | 2.193755000  | -0.891683000 | -5.744381000 |
| H  | 3.577062000  | -0.426608000 | -3.756245000 |

|   |              |              |              |
|---|--------------|--------------|--------------|
| H | -2.293864000 | 0.234221000  | -3.440907000 |
| H | -3.474826000 | 0.073334000  | -4.772642000 |
| H | -0.910368000 | -3.953970000 | -5.758307000 |
| H | -0.019853000 | 0.855609000  | -4.147062000 |
| H | -2.254415000 | -1.869458000 | -7.166066000 |
| H | -1.603853000 | 0.205061000  | -6.418260000 |
| O | -2.472639000 | -2.225342000 | -6.294406000 |
| O | 2.616831000  | -0.320058000 | -3.788663000 |
| O | -2.455102000 | 1.897554000  | -4.710849000 |
| O | 0.214989000  | -1.692484000 | -3.256291000 |
| O | -0.089621000 | -3.598348000 | -5.388017000 |
| O | -0.110490000 | 0.145684000  | -5.009672000 |

Hf-NU-1000 (-CH<sub>3</sub>) Int2

|   |              |              |              |
|---|--------------|--------------|--------------|
| C | -3.248200000 | -2.182800000 | -1.650100000 |
| C | -3.229700000 | -2.386600000 | 2.900000000  |
| C | -3.232300000 | 2.034300000  | 3.104000000  |
| C | 3.276900000  | 2.142000000  | 2.939200000  |
| C | 3.226900000  | 2.366300000  | -1.338700000 |
| C | 3.259300000  | -2.277900000 | -1.561500000 |
| C | -3.265300000 | 2.236100000  | -1.457300000 |
| C | 3.257200000  | -2.506600000 | 2.716400000  |
| H | 4.087969000  | 2.685450000  | 3.471962000  |
| H | 4.065926000  | -3.150436000 | 3.128325000  |
| H | -4.030563000 | 2.549653000  | 3.681942000  |
| H | -4.031670000 | -2.993404000 | 3.374274000  |
| C | 5.402097000  | -1.906139000 | -2.739829000 |
| C | -5.439927000 | -1.701567000 | -2.651305000 |
| C | 4.299343000  | -2.750340000 | -2.528796000 |
| C | -4.349369000 | -2.585542000 | -2.573613000 |
| C | 4.171178000  | -3.945304000 | -3.276704000 |
| C | -4.324894000 | -3.744866000 | -3.378635000 |
| C | 5.168242000  | -4.229910000 | -4.220965000 |
| C | -5.409788000 | -3.959649000 | -4.241860000 |
| C | 6.242724000  | -3.373064000 | -4.445506000 |
| C | -6.468903000 | -3.064541000 | -4.335884000 |
| C | 6.363790000  | -2.200859000 | -3.700705000 |
| C | -6.486129000 | -1.921889000 | -3.535412000 |
| C | 5.491190000  | 3.321425000  | -1.096584000 |
| C | -5.650458000 | 2.540423000  | -2.013390000 |
| C | 4.311490000  | 3.254682000  | -1.852859000 |
| C | -4.339352000 | 3.031912000  | -2.107650000 |
| C | 4.186200000  | 4.018112000  | -3.037433000 |
| C | -4.084424000 | 4.235357000  | -2.810419000 |
| C | 5.265859000  | 4.833527000  | -3.402039000 |
| C | -5.179257000 | 4.880460000  | -3.401455000 |



|   |              |              |              |
|---|--------------|--------------|--------------|
| C | 6.422964000  | 4.915421000  | -2.631276000 |
| C | -6.472836000 | 4.372333000  | -3.323812000 |
| C | 6.539601000  | 4.154392000  | -1.469742000 |
| C | -6.714648000 | 3.193031000  | -2.621749000 |
| H | 5.479150000  | -1.003243000 | -2.127464000 |
| H | -5.429136000 | -0.820951000 | -2.006774000 |
| H | 5.091914000  | -5.156785000 | -4.796266000 |
| H | -5.408600000 | -4.859620000 | -4.863252000 |
| H | 7.207669000  | -1.525976000 | -3.858767000 |
| H | -7.312354000 | -1.210079000 | -3.597397000 |
| H | 5.558329000  | 2.705246000  | -0.197095000 |
| H | -5.813056000 | 1.624657000  | -1.443370000 |
| H | 5.191564000  | 5.417857000  | -4.323474000 |
| H | -5.001769000 | 5.814510000  | -3.941713000 |
| H | 7.444431000  | 4.205700000  | -0.860493000 |
| H | -7.726073000 | 2.788302000  | -2.544088000 |
| H | -7.286840000 | -3.262194000 | -5.033045000 |
| H | 6.992027000  | -3.627967000 | -5.198626000 |
| H | -7.295011000 | 4.905453000  | -3.807729000 |
| H | 7.238638000  | 5.570981000  | -2.945600000 |
| H | -1.950246000 | -2.933080000 | 0.624432000  |
| H | -0.874523000 | 1.384367000  | 5.088828000  |
| H | -0.011611000 | 0.081038000  | 4.796553000  |
| H | 0.034754000  | 3.985708000  | 0.576298000  |
| H | 0.649195000  | 4.298280000  | 2.639142000  |
| H | 0.904279000  | 4.258716000  | -0.720671000 |
| H | 1.964249000  | -0.169310000 | 3.577564000  |
| H | -1.944835000 | 2.773963000  | 0.799535000  |
| H | -0.609156000 | -1.988205000 | 5.119796000  |
| H | 0.894550000  | -4.450961000 | 2.185804000  |
| H | 0.727507000  | -4.443110000 | -1.087546000 |
| H | 0.007975000  | -4.167922000 | 0.898228000  |
| O | -1.059190000 | -0.100962000 | 2.182061000  |
| O | -3.617798000 | 1.286155000  | 2.168738000  |
| O | -3.618688000 | 1.319744000  | -0.644767000 |
| O | -3.607897000 | -1.501494000 | 2.092969000  |
| O | -2.049877000 | -2.652486000 | 3.242680000  |
| O | 0.038913000  | -4.091634000 | 1.913884000  |
| O | 2.077748000  | -2.831527000 | 3.001008000  |
| O | 2.082859000  | -2.703690000 | -1.702345000 |
| O | 3.629762000  | -1.528234000 | 2.020238000  |
| O | 3.619701000  | -1.414537000 | -0.708950000 |
| O | 3.644494000  | 1.288011000  | 2.092308000  |
| O | 3.585525000  | 1.381933000  | -0.628121000 |
| O | 2.026899000  | 2.647535000  | -1.620654000 |
| O | 2.098362000  | 2.448774000  | 3.247166000  |

|    |              |              |              |
|----|--------------|--------------|--------------|
| O  | 1.064962000  | 1.400690000  | 0.731570000  |
| O  | 1.409663000  | -0.119968000 | 2.789197000  |
| O  | 0.037272000  | -1.511984000 | 4.587030000  |
| O  | -0.026903000 | 1.097965000  | 4.721315000  |
| O  | 1.065167000  | -1.555533000 | 0.714351000  |
| O  | -1.384015000 | -2.155932000 | 0.702860000  |
| O  | -2.057430000 | -2.503246000 | -1.919859000 |
| O  | -0.026918000 | -3.981445000 | -0.705532000 |
| O  | -3.583753000 | -1.448686000 | -0.667043000 |
| O  | -0.010134000 | 3.777677000  | 2.167437000  |
| O  | 0.044432000  | 3.917001000  | -0.440166000 |
| O  | -1.394396000 | 1.981746000  | 0.774205000  |
| O  | -2.046182000 | 2.251825000  | 3.457579000  |
| O  | -2.059163000 | 2.483074000  | -1.739063000 |
| O  | 1.364717000  | -0.055567000 | -1.343068000 |
| O  | -1.100628000 | -0.074144000 | -0.801689000 |
| H  | 1.843087000  | -0.086591000 | -2.191395000 |
| O  | 0.043120000  | 1.774351000  | -3.188636000 |
| H  | 0.897106000  | 2.106610000  | -3.491134000 |
| C  | -2.733879000 | 4.867724000  | -2.935926000 |
| H  | -2.225654000 | 4.971046000  | -1.968404000 |
| H  | -2.057270000 | 4.265478000  | -3.557104000 |
| H  | -2.819775000 | 5.861985000  | -3.393396000 |
| C  | 2.990482000  | 3.959141000  | -3.938749000 |
| H  | 2.737612000  | 2.923033000  | -4.209410000 |
| H  | 2.090293000  | 4.386412000  | -3.475394000 |
| H  | 3.180129000  | 4.505105000  | -4.871441000 |
| C  | 3.047488000  | -4.920468000 | -3.102480000 |
| H  | 2.862626000  | -5.149466000 | -2.044614000 |
| H  | 2.097452000  | -4.535415000 | -3.502754000 |
| H  | 3.269681000  | -5.861595000 | -3.621165000 |
| C  | -3.220826000 | -4.756198000 | -3.372959000 |
| H  | -2.542086000 | -4.573377000 | -4.221963000 |
| H  | -2.621412000 | -4.754068000 | -2.455938000 |
| H  | -3.624306000 | -5.766279000 | -3.527143000 |
| Hf | 2.518925000  | -0.078185000 | 0.695619000  |
| Hf | -0.019497000 | -1.870880000 | 2.518344000  |
| Hf | 0.030653000  | 1.707077000  | 2.509161000  |
| Hf | -0.043068000 | 1.694717000  | -1.073522000 |
| Hf | -2.540117000 | -0.076401000 | 0.713973000  |
| Hf | 0.012581000  | -1.890794000 | -1.041956000 |
| C  | -1.738897000 | -1.828365000 | -5.258452000 |
| C  | -0.327843000 | -2.424613000 | -5.356094000 |
| C  | 0.548823000  | -1.644268000 | -4.399553000 |
| C  | -1.645593000 | -0.301264000 | -5.396299000 |
| C  | 1.971729000  | -1.343740000 | -4.767152000 |

|   |              |              |              |
|---|--------------|--------------|--------------|
| C | -2.580802000 | 0.419427000  | -4.439791000 |
| H | 2.490828000  | -2.322765000 | -4.703278000 |
| H | 0.054237000  | -2.355281000 | -6.388890000 |
| H | -2.097406000 | -2.076730000 | -4.243030000 |
| H | -1.760370000 | 2.106601000  | -4.026453000 |
| H | 2.020888000  | -1.014635000 | -5.818208000 |
| H | 3.495310000  | -0.544364000 | -3.859236000 |
| H | -2.349679000 | 0.082954000  | -3.404278000 |
| H | -3.610286000 | 0.084474000  | -4.655166000 |
| H | -0.669211000 | -3.853072000 | -4.105547000 |
| H | -0.210907000 | 0.727033000  | -4.412878000 |
| H | -2.406403000 | -2.208382000 | -7.033493000 |
| H | -1.904998000 | -0.020391000 | -6.435612000 |
| O | -2.660807000 | -2.420484000 | -6.126887000 |
| O | 2.539312000  | -0.400975000 | -3.892360000 |
| O | -2.515470000 | 1.806781000  | -4.564091000 |
| O | 0.180975000  | -1.650906000 | -3.214362000 |
| O | -0.275934000 | -3.782452000 | -4.990596000 |
| O | -0.285225000 | 0.084494000  | -5.187263000 |

Hf-NU-1000 (-CH<sub>3</sub>) Int2\_Ro

|   |              |              |              |
|---|--------------|--------------|--------------|
| C | -3.248200000 | -2.182800000 | -1.650100000 |
| C | -3.229700000 | -2.386600000 | 2.900000000  |
| C | -3.232300000 | 2.034300000  | 3.104000000  |
| C | 3.276900000  | 2.142000000  | 2.939200000  |
| C | 3.226900000  | 2.366300000  | -1.338700000 |
| C | 3.259300000  | -2.277900000 | -1.561500000 |
| C | -3.265300000 | 2.236100000  | -1.457300000 |
| C | 3.257200000  | -2.506600000 | 2.716400000  |
| H | 4.086730000  | 2.697232000  | 3.461302000  |
| H | 4.062881000  | -3.142265000 | 3.146333000  |
| H | -4.031718000 | 2.553262000  | 3.677610000  |
| H | -4.031248000 | -2.968578000 | 3.405269000  |
| C | 5.603252000  | -2.262825000 | -2.337905000 |
| C | -5.599330000 | -2.323162000 | -2.415060000 |
| C | 4.336109000  | -2.861868000 | -2.414656000 |
| C | -4.326028000 | -2.914881000 | -2.380939000 |
| C | 4.121104000  | -3.941756000 | -3.307392000 |
| C | -4.087623000 | -4.141792000 | -3.048378000 |
| C | 5.207303000  | -4.364700000 | -4.086593000 |
| C | -5.160760000 | -4.710124000 | -3.750538000 |
| C | 6.457664000  | -3.757165000 | -4.009385000 |
| C | -6.410956000 | -4.100445000 | -3.810697000 |
| C | 6.659910000  | -2.697062000 | -3.128294000 |
| C | -6.637186000 | -2.899225000 | -3.137770000 |
| C | 5.607800000  | 3.010423000  | -1.493988000 |

|   |              |              |              |
|---|--------------|--------------|--------------|
| C | -5.663152000 | 2.655383000  | -1.871397000 |
| C | 4.300599000  | 3.182675000  | -1.974812000 |
| C | -4.335510000 | 3.048033000  | -2.099586000 |
| C | 4.049537000  | 4.099807000  | -3.025140000 |
| C | -4.062175000 | 4.168111000  | -2.923881000 |
| C | 5.145120000  | 4.808047000  | -3.539760000 |
| C | -5.158633000 | 4.837911000  | -3.486856000 |
| C | 6.435783000  | 4.641798000  | -3.045756000 |
| C | -6.471281000 | 4.434963000  | -3.260651000 |
| C | 6.672248000  | 3.736342000  | -2.013048000 |
| C | -6.728885000 | 3.334778000  | -2.444363000 |
| H | 5.731622000  | -1.432532000 | -1.641606000 |
| H | -5.739845000 | -1.387051000 | -1.869807000 |
| H | 5.059950000  | -5.203289000 | -4.773013000 |
| H | -5.001954000 | -5.662456000 | -4.263802000 |
| H | 7.634998000  | -2.210709000 | -3.057323000 |
| H | -7.619234000 | -2.422136000 | -3.168278000 |
| H | 5.763191000  | 2.287814000  | -0.690900000 |
| H | -5.831422000 | 1.784514000  | -1.236290000 |
| H | 4.971202000  | 5.511569000  | -4.358964000 |
| H | -4.966382000 | 5.708792000  | -4.119899000 |
| H | 7.680321000  | 3.594186000  | -1.617717000 |
| H | -7.754488000 | 3.009182000  | -2.257476000 |
| H | -7.216178000 | -4.572139000 | -4.379122000 |
| H | 7.275516000  | -4.117149000 | -4.638395000 |
| H | -7.294894000 | 4.986429000  | -3.721179000 |
| H | 7.259072000  | 5.219268000  | -3.473601000 |
| H | -1.939254000 | -2.931885000 | 0.583688000  |
| H | -0.881818000 | 1.347141000  | 5.091467000  |
| H | -0.016392000 | 0.048294000  | 4.785249000  |
| H | 0.010785000  | 4.012864000  | 0.600492000  |
| H | 0.657240000  | 4.289573000  | 2.657660000  |
| H | 0.882886000  | 4.286918000  | -0.692601000 |
| H | 1.958995000  | -0.199135000 | 3.569373000  |
| H | -1.950817000 | 2.786979000  | 0.826537000  |
| H | -0.604493000 | -2.028934000 | 5.083934000  |
| H | 0.905142000  | -4.435596000 | 2.103913000  |
| H | 0.641266000  | -4.412356000 | -1.222599000 |
| H | 0.017383000  | -4.138618000 | 0.821227000  |
| O | -1.065132000 | -0.104729000 | 2.176681000  |
| O | -3.617014000 | 1.286089000  | 2.168219000  |
| O | -3.618993000 | 1.353575000  | -0.614837000 |
| O | -3.609302000 | -1.508768000 | 2.083811000  |
| O | -2.046395000 | -2.672420000 | 3.212764000  |
| O | 0.042810000  | -4.086795000 | 1.838127000  |
| O | 2.073532000  | -2.848371000 | 2.968484000  |

|    |              |              |              |
|----|--------------|--------------|--------------|
| O  | 2.059163000  | -2.604184000 | -1.798470000 |
| O  | 3.631552000  | -1.520908000 | 2.033580000  |
| O  | 3.605311000  | -1.441264000 | -0.677845000 |
| O  | 3.644681000  | 1.284491000  | 2.098213000  |
| O  | 3.590815000  | 1.380362000  | -0.626444000 |
| O  | 2.022254000  | 2.693081000  | -1.526647000 |
| O  | 2.097422000  | 2.439885000  | 3.257019000  |
| O  | 1.062209000  | 1.404147000  | 0.753354000  |
| O  | 1.405710000  | -0.134620000 | 2.781180000  |
| O  | 0.037290000  | -1.540278000 | 4.557036000  |
| O  | -0.032523000 | 1.066612000  | 4.723693000  |
| O  | 1.056429000  | -1.550611000 | 0.680207000  |
| O  | -1.395843000 | -2.137366000 | 0.648235000  |
| O  | -2.053683000 | -2.358638000 | -2.013165000 |
| O  | -0.055015000 | -3.919053000 | -0.775510000 |
| O  | -3.618641000 | -1.411842000 | -0.713183000 |
| O  | -0.012435000 | 3.777663000  | 2.190889000  |
| O  | 0.013775000  | 3.961872000  | -0.417622000 |
| O  | -1.395804000 | 1.999058000  | 0.778043000  |
| O  | -2.047700000 | 2.247051000  | 3.463301000  |
| O  | -2.062377000 | 2.453989000  | -1.782742000 |
| O  | 1.377196000  | -0.018779000 | -1.333545000 |
| O  | -1.085233000 | -0.039224000 | -0.792002000 |
| H  | 1.923028000  | 0.001528000  | -2.144863000 |
| O  | 0.140294000  | 1.728346000  | -3.141449000 |
| H  | -0.607607000 | 1.849867000  | -3.734893000 |
| C  | -2.689281000 | 4.690212000  | -3.220728000 |
| H  | -2.103470000 | 4.875452000  | -2.310786000 |
| H  | -2.090219000 | 3.977155000  | -3.805237000 |
| H  | -2.753573000 | 5.625512000  | -3.792217000 |
| C  | 2.700740000  | 4.342010000  | -3.630274000 |
| H  | 2.177061000  | 3.412437000  | -3.885371000 |
| H  | 2.024594000  | 4.868806000  | -2.940906000 |
| H  | 2.793908000  | 4.957336000  | -4.534894000 |
| C  | 2.821844000  | -4.674322000 | -3.453343000 |
| H  | 2.463116000  | -5.064090000 | -2.490810000 |
| H  | 2.011771000  | -4.036333000 | -3.833867000 |
| H  | 2.935812000  | -5.524825000 | -4.137720000 |
| C  | -2.768844000 | -4.849454000 | -3.030483000 |
| H  | -2.026298000 | -4.349496000 | -3.669955000 |
| H  | -2.307631000 | -4.864773000 | -2.034728000 |
| H  | -2.881544000 | -5.880753000 | -3.388595000 |
| Hf | 2.523223000  | -0.067861000 | 0.692558000  |
| Hf | -0.020066000 | -1.876588000 | 2.481626000  |
| Hf | 0.032777000  | 1.703084000  | 2.518555000  |
| Hf | -0.032509000 | 1.742036000  | -1.059121000 |

|    |              |              |              |
|----|--------------|--------------|--------------|
| Hf | -2.534384000 | -0.065270000 | 0.703964000  |
| Hf | 0.026972000  | -1.828793000 | -1.096768000 |
| C  | -1.440449000 | -0.450491000 | -5.898425000 |
| C  | -0.321077000 | -1.517637000 | -5.735467000 |
| C  | 0.520996000  | -1.154582000 | -4.522408000 |
| C  | -2.494781000 | -0.517417000 | -4.801851000 |
| C  | 1.786637000  | -0.394531000 | -4.816894000 |
| C  | -3.489877000 | 0.633797000  | -4.844793000 |
| H  | 2.533580000  | -1.185567000 | -5.039676000 |
| H  | 0.337550000  | -1.426412000 | -6.623787000 |
| H  | -1.960447000 | -0.682650000 | -6.849905000 |
| H  | -5.079915000 | -0.348037000 | -4.353861000 |
| H  | 1.641809000  | 0.128477000  | -5.784404000 |
| H  | 1.512641000  | 1.086562000  | -3.643688000 |
| H  | -3.828153000 | 0.805024000  | -5.885761000 |
| H  | -3.013685000 | 1.564047000  | -4.501946000 |
| H  | -1.737511000 | -2.768507000 | -5.388382000 |
| H  | -3.601574000 | -2.021918000 | -4.196684000 |
| H  | -0.469556000 | 1.019005000  | -6.744978000 |
| H  | -2.020858000 | -0.527784000 | -3.800837000 |
| O  | -0.912829000 | 0.857787000  | -5.905254000 |
| O  | 2.265166000  | 0.438452000  | -3.831684000 |
| O  | -4.564191000 | 0.377060000  | -3.978734000 |
| O  | 0.165327000  | -1.502334000 | -3.404598000 |
| O  | -0.807400000 | -2.815469000 | -5.682403000 |
| O  | -3.182617000 | -1.747254000 | -5.026474000 |

Hf-NU-1000 (-CH<sub>3</sub>) TS3

|   |              |              |              |
|---|--------------|--------------|--------------|
| C | -3.248200000 | -2.182800000 | -1.650100000 |
| C | -3.229700000 | -2.386600000 | 2.900000000  |
| C | -3.232300000 | 2.034300000  | 3.104000000  |
| C | 3.276900000  | 2.142000000  | 2.939200000  |
| C | 3.226900000  | 2.366300000  | -1.338700000 |
| C | 3.259300000  | -2.277900000 | -1.561500000 |
| C | -3.265300000 | 2.236100000  | -1.457300000 |
| C | 3.257200000  | -2.506600000 | 2.716400000  |
| H | 4.087747000  | 2.715414000  | 3.440542000  |
| H | 4.062236000  | -3.146245000 | 3.141053000  |
| H | -4.032007000 | 2.572449000  | 3.659352000  |
| H | -4.032756000 | -2.984663000 | 3.383685000  |
| C | 5.627133000  | -2.361045000 | -2.267761000 |
| C | -5.262102000 | -1.596473000 | -2.931155000 |
| C | 4.328098000  | -2.872088000 | -2.416009000 |
| C | -4.325514000 | -2.584783000 | -2.595668000 |
| C | 4.078030000  | -3.891085000 | -3.370433000 |
| C | -4.376330000 | -3.857443000 | -3.200277000 |

|   |              |              |              |
|---|--------------|--------------|--------------|
| C | 5.163668000  | -4.341602000 | -4.135228000 |
| C | -5.379781000 | -4.078982000 | -4.153408000 |
| C | 6.447034000  | -3.824781000 | -3.982073000 |
| C | -6.282979000 | -3.082921000 | -4.516215000 |
| C | 6.683764000  | -2.826142000 | -3.039851000 |
| C | -6.228856000 | -1.832623000 | -3.900792000 |
| C | 5.527922000  | 3.251801000  | -1.262535000 |
| C | -5.671365000 | 2.403936000  | -1.998172000 |
| C | 4.290978000  | 3.229206000  | -1.924452000 |
| C | -4.358332000 | 2.787611000  | -2.316251000 |
| C | 4.096975000  | 4.010091000  | -3.088753000 |
| C | -4.126190000 | 3.605216000  | -3.449534000 |
| C | 5.171430000  | 4.794338000  | -3.529479000 |
| C | -5.237423000 | 3.996462000  | -4.210771000 |
| C | 6.387962000  | 4.829855000  | -2.853068000 |
| C | -6.534021000 | 3.606395000  | -3.887322000 |
| C | 6.570725000  | 4.053443000  | -1.710323000 |
| C | -6.755253000 | 2.802842000  | -2.770192000 |
| H | 5.782391000  | -1.576252000 | -1.526181000 |
| H | -5.191079000 | -0.627737000 | -2.428662000 |
| H | 4.987446000  | -5.128457000 | -4.874032000 |
| H | -5.447106000 | -5.064202000 | -4.623523000 |
| H | 7.685043000  | -2.410510000 | -2.908798000 |
| H | -6.930974000 | -1.043725000 | -4.181487000 |
| H | 5.644946000  | 2.623385000  | -0.377197000 |
| H | -5.816600000 | 1.769654000  | -1.122366000 |
| H | 5.044515000  | 5.390469000  | -4.437503000 |
| H | -5.070098000 | 4.628473000  | -5.087823000 |
| H | 7.522412000  | 4.067584000  | -1.175006000 |
| H | -7.766344000 | 2.491083000  | -2.499582000 |
| H | -7.038000000 | -3.287538000 | -5.279138000 |
| H | 7.262793000  | -4.205685000 | -4.601430000 |
| H | -7.371764000 | 3.936885000  | -4.506644000 |
| H | 7.197984000  | 5.460757000  | -3.226917000 |
| H | -1.929718000 | -2.923513000 | 0.605241000  |
| H | -0.883058000 | 1.316289000  | 5.144480000  |
| H | -0.017421000 | 0.016415000  | 4.814964000  |
| H | 0.054170000  | 4.010324000  | 0.667221000  |
| H | 0.669083000  | 4.272801000  | 2.715130000  |
| H | 0.985489000  | 4.245314000  | -0.595891000 |
| H | 1.966553000  | -0.204618000 | 3.599493000  |
| H | -1.918144000 | 2.795439000  | 0.841370000  |
| H | -0.614607000 | -2.034333000 | 5.089335000  |
| H | 0.879558000  | -4.466832000 | 2.175747000  |
| H | 0.685078000  | -4.445533000 | -1.124293000 |
| H | 0.027272000  | -4.150259000 | 0.863138000  |

|   |              |              |              |
|---|--------------|--------------|--------------|
| O | -1.056818000 | -0.101540000 | 2.200145000  |
| O | -3.614901000 | 1.284665000  | 2.170515000  |
| O | -3.604272000 | 1.383470000  | -0.580967000 |
| O | -3.611137000 | -1.501204000 | 2.091656000  |
| O | -2.049893000 | -2.659171000 | 3.229117000  |
| O | 0.036957000  | -4.088391000 | 1.890645000  |
| O | 2.076319000  | -2.836107000 | 2.982912000  |
| O | 2.069112000  | -2.643349000 | -1.734414000 |
| O | 3.638818000  | -1.528084000 | 2.024957000  |
| O | 3.615565000  | -1.402594000 | -0.708061000 |
| O | 3.643660000  | 1.280706000  | 2.103520000  |
| O | 3.589241000  | 1.415518000  | -0.593424000 |
| O | 2.009475000  | 2.645619000  | -1.595281000 |
| O | 2.100463000  | 2.429152000  | 3.279672000  |
| O | 1.081736000  | 1.405797000  | 0.790107000  |
| O | 1.415232000  | -0.136819000 | 2.810259000  |
| O | 0.037171000  | -1.546085000 | 4.574128000  |
| O | -0.036941000 | 1.041441000  | 4.765469000  |
| O | 1.066294000  | -1.525912000 | 0.697077000  |
| O | -1.382047000 | -2.133368000 | 0.686753000  |
| O | -2.067788000 | -2.544307000 | -1.901787000 |
| O | -0.010300000 | -3.948520000 | -0.680812000 |
| O | -3.580669000 | -1.410841000 | -0.696740000 |
| O | -0.000129000 | 3.767400000  | 2.240174000  |
| O | 0.096384000  | 3.949677000  | -0.353757000 |
| O | -1.368757000 | 2.002295000  | 0.831663000  |
| O | -2.051026000 | 2.231433000  | 3.485879000  |
| O | -2.065208000 | 2.578347000  | -1.676312000 |
| O | 1.368607000  | -0.002395000 | -1.346488000 |
| O | -1.089696000 | -0.025694000 | -0.769109000 |
| H | 1.845334000  | -0.023867000 | -2.198843000 |
| O | -0.098759000 | 1.646611000  | -3.198182000 |
| H | -0.299424000 | 2.523415000  | -3.551543000 |
| C | -2.771596000 | 4.049027000  | -3.908894000 |
| H | -2.207628000 | 4.569619000  | -3.124135000 |
| H | -2.160367000 | 3.183474000  | -4.206405000 |
| H | -2.858049000 | 4.711699000  | -4.779960000 |
| C | 2.831837000  | 4.008832000  | -3.891531000 |
| H | 2.487241000  | 2.988757000  | -4.107203000 |
| H | 2.005947000  | 4.507263000  | -3.362867000 |
| H | 2.982869000  | 4.530136000  | -4.845638000 |
| C | 2.742470000  | -4.528749000 | -3.606164000 |
| H | 2.353852000  | -5.010495000 | -2.698288000 |
| H | 1.970001000  | -3.807183000 | -3.905690000 |
| H | 2.818465000  | -5.297439000 | -4.386127000 |
| C | -3.428911000 | -4.962585000 | -2.847623000 |



|    |              |              |              |
|----|--------------|--------------|--------------|
| H  | -2.503528000 | -4.906017000 | -3.439401000 |
| H  | -3.118205000 | -4.939976000 | -1.795582000 |
| H  | -3.881263000 | -5.941538000 | -3.053169000 |
| Hf | 2.542839000  | -0.096020000 | 0.696157000  |
| Hf | -0.006611000 | -1.882428000 | 2.491434000  |
| Hf | 0.036401000  | 1.687392000  | 2.578145000  |
| Hf | -0.009982000 | 1.716925000  | -0.939914000 |
| Hf | -2.530875000 | -0.079641000 | 0.732846000  |
| Hf | 0.016488000  | -1.870004000 | -1.103669000 |
| C  | -1.874495000 | 0.034754000  | -5.080046000 |
| C  | -0.697012000 | -2.150396000 | -5.272981000 |
| C  | 0.241287000  | -1.552135000 | -4.459488000 |
| C  | -3.040831000 | -0.519953000 | -5.824008000 |
| C  | 1.487710000  | -0.883173000 | -4.983667000 |
| C  | -4.191010000 | 0.481523000  | -5.757105000 |
| H  | 2.290748000  | -1.638357000 | -5.052163000 |
| H  | -0.624518000 | -2.175738000 | -6.361330000 |
| H  | -1.098635000 | 0.540801000  | -5.692061000 |
| H  | -5.904922000 | 0.615115000  | -6.658085000 |
| H  | 1.321028000  | -0.530477000 | -6.020871000 |
| H  | 1.263058000  | 0.765281000  | -3.961532000 |
| H  | -3.843123000 | 1.470895000  | -6.119112000 |
| H  | -4.513583000 | 0.603374000  | -4.705844000 |
| H  | -1.669802000 | -2.818219000 | -3.781033000 |
| H  | -3.492356000 | -0.901614000 | -7.634019000 |
| H  | -1.019187000 | 0.991415000  | -3.459919000 |
| H  | -3.375114000 | -1.450730000 | -5.316769000 |
| O  | -1.993871000 | 0.287420000  | -3.852812000 |
| O  | 1.985157000  | 0.132593000  | -4.147480000 |
| O  | -5.204756000 | -0.040735000 | -6.581690000 |
| O  | 0.064995000  | -1.591196000 | -3.180397000 |
| O  | -1.663372000 | -2.933957000 | -4.758193000 |
| O  | -2.666065000 | -0.752762000 | -7.154993000 |

Hf-NU-1000 (-CH<sub>3</sub>) Int3

|   |              |              |              |
|---|--------------|--------------|--------------|
| C | -3.248200000 | -2.182800000 | -1.650100000 |
| C | -3.229700000 | -2.386600000 | 2.900000000  |
| C | -3.232300000 | 2.034300000  | 3.104000000  |
| C | 3.276900000  | 2.142000000  | 2.939200000  |
| C | 3.226900000  | 2.366300000  | -1.338700000 |
| C | 3.259300000  | -2.277900000 | -1.561500000 |
| C | -3.265300000 | 2.236100000  | -1.457300000 |
| C | 3.257200000  | -2.506600000 | 2.716400000  |
| H | 4.087733000  | 2.718672000  | 3.436833000  |
| H | 4.061701000  | -3.145111000 | 3.143524000  |
| H | -4.031972000 | 2.575215000  | 3.656541000  |

|   |              |              |              |
|---|--------------|--------------|--------------|
| H | -4.032601000 | -2.982587000 | 3.386548000  |
| C | 5.610384000  | -2.299345000 | -2.326141000 |
| C | -5.342591000 | -1.652771000 | -2.830793000 |
| C | 4.330571000  | -2.869175000 | -2.414600000 |
| C | -4.351400000 | -2.607066000 | -2.562783000 |
| C | 4.097290000  | -3.939243000 | -3.315763000 |
| C | -4.396569000 | -3.879113000 | -3.173350000 |
| C | 5.179605000  | -4.379689000 | -4.090908000 |
| C | -5.449317000 | -4.130366000 | -4.065165000 |
| C | 6.442926000  | -3.802153000 | -4.000325000 |
| C | -6.417461000 | -3.170395000 | -4.353577000 |
| C | 6.663160000  | -2.753049000 | -3.110376000 |
| C | -6.369689000 | -1.921168000 | -3.730126000 |
| C | 5.527050000  | 3.252582000  | -1.270401000 |
| C | -5.674337000 | 2.464472000  | -1.948728000 |
| C | 4.290830000  | 3.222815000  | -1.933445000 |
| C | -4.358609000 | 2.815165000  | -2.293719000 |
| C | 4.098844000  | 3.989857000  | -3.107089000 |
| C | -4.129998000 | 3.634058000  | -3.426972000 |
| C | 5.173841000  | 4.768658000  | -3.555752000 |
| C | -5.246233000 | 4.054560000  | -4.163982000 |
| C | 6.389409000  | 4.812004000  | -2.878021000 |
| C | -6.544886000 | 3.696279000  | -3.814540000 |
| C | 6.570499000  | 4.048857000  | -1.726126000 |
| C | -6.763340000 | 2.896064000  | -2.694907000 |
| H | 5.753190000  | -1.477039000 | -1.623611000 |
| H | -5.278882000 | -0.687427000 | -2.321181000 |
| H | 5.017307000  | -5.207483000 | -4.786883000 |
| H | -5.512379000 | -5.115289000 | -4.536008000 |
| H | 7.648791000  | -2.290081000 | -3.028642000 |
| H | -7.128678000 | -1.162130000 | -3.939334000 |
| H | 5.643086000  | 2.634238000  | -0.377857000 |
| H | -5.817536000 | 1.831594000  | -1.071570000 |
| H | 5.048391000  | 5.353738000  | -4.471102000 |
| H | -5.082340000 | 4.683064000  | -5.043789000 |
| H | 7.521496000  | 4.068976000  | -1.189818000 |
| H | -7.776498000 | 2.610075000  | -2.404454000 |
| H | -7.225130000 | -3.408078000 | -5.051606000 |
| H | 7.256501000  | -4.176074000 | -4.626765000 |
| H | -7.385589000 | 4.044858000  | -4.419009000 |
| H | 7.200022000  | 5.438343000  | -3.258119000 |
| H | -1.929358000 | -2.920799000 | 0.604842000  |
| H | -0.879060000 | 1.304836000  | 5.160041000  |
| H | -0.017844000 | 0.003719000  | 4.815711000  |
| H | 0.052891000  | 4.012477000  | 0.678207000  |
| H | 0.670398000  | 4.270355000  | 2.722200000  |

|   |              |              |              |
|---|--------------|--------------|--------------|
| H | 0.982426000  | 4.253944000  | -0.585926000 |
| H | 1.965962000  | -0.209176000 | 3.601317000  |
| H | -1.916450000 | 2.799837000  | 0.845774000  |
| H | -0.614853000 | -2.041740000 | 5.081374000  |
| H | 0.879775000  | -4.467858000 | 2.161844000  |
| H | 0.656201000  | -4.451285000 | -1.150564000 |
| H | 0.028618000  | -4.146522000 | 0.847493000  |
| O | -1.055593000 | -0.100361000 | 2.199793000  |
| O | -3.613937000 | 1.284930000  | 2.170224000  |
| O | -3.603986000 | 1.385119000  | -0.579679000 |
| O | -3.612035000 | -1.500710000 | 2.091938000  |
| O | -2.049504000 | -2.661379000 | 3.224831000  |
| O | 0.038363000  | -4.086775000 | 1.876961000  |
| O | 2.075976000  | -2.837427000 | 2.978731000  |
| O | 2.070826000  | -2.642261000 | -1.739193000 |
| O | 3.640063000  | -1.527415000 | 2.026262000  |
| O | 3.613915000  | -1.399569000 | -0.708865000 |
| O | 3.643043000  | 1.280662000  | 2.103802000  |
| O | 3.588290000  | 1.421008000  | -0.588129000 |
| O | 2.007430000  | 2.647375000  | -1.594429000 |
| O | 2.100756000  | 2.426386000  | 3.284290000  |
| O | 1.081754000  | 1.409419000  | 0.799463000  |
| O | 1.415279000  | -0.138115000 | 2.811903000  |
| O | 0.036844000  | -1.550922000 | 4.568482000  |
| O | -0.037056000 | 1.030744000  | 4.771780000  |
| O | 1.068579000  | -1.521637000 | 0.693630000  |
| O | -1.384632000 | -2.128334000 | 0.682070000  |
| O | -2.075390000 | -2.544323000 | -1.914921000 |
| O | -0.019041000 | -3.943749000 | -0.688409000 |
| O | -3.577399000 | -1.404309000 | -0.700406000 |
| O | 0.000098000  | 3.765706000  | 2.247868000  |
| O | 0.095352000  | 3.952432000  | -0.343753000 |
| O | -1.368438000 | 2.005633000  | 0.837528000  |
| O | -2.051541000 | 2.228570000  | 3.489826000  |
| O | -2.058703000 | 2.559042000  | -1.688041000 |
| O | 1.369606000  | 0.011786000  | -1.346913000 |
| O | -1.089046000 | -0.018230000 | -0.769800000 |
| H | 1.842978000  | -0.003569000 | -2.203761000 |
| O | -0.075883000 | 1.694341000  | -3.238894000 |
| H | -0.296733000 | 2.578490000  | -3.564301000 |
| C | -2.775384000 | 4.055969000  | -3.908047000 |
| H | -2.185878000 | 4.554317000  | -3.127413000 |
| H | -2.190479000 | 3.182977000  | -4.235529000 |
| H | -2.866347000 | 4.733582000  | -4.766859000 |
| C | 2.835011000  | 3.978287000  | -3.911928000 |
| H | 2.492299000  | 2.955023000  | -4.115532000 |

|    |              |              |              |
|----|--------------|--------------|--------------|
| H  | 2.008975000  | 4.484266000  | -3.390539000 |
| H  | 2.987303000  | 4.487243000  | -4.872435000 |
| C  | 2.783538000  | -4.641011000 | -3.480700000 |
| H  | 2.423686000  | -5.060743000 | -2.531181000 |
| H  | 1.982843000  | -3.973584000 | -3.830665000 |
| H  | 2.879323000  | -5.467118000 | -4.197150000 |
| C  | -3.403150000 | -4.960208000 | -2.881707000 |
| H  | -2.510960000 | -4.868920000 | -3.517945000 |
| H  | -3.042749000 | -4.938725000 | -1.845971000 |
| H  | -3.839079000 | -5.948239000 | -3.078075000 |
| Hf | 2.544925000  | -0.099518000 | 0.697202000  |
| Hf | -0.004904000 | -1.884365000 | 2.483138000  |
| Hf | 0.034499000  | 1.685320000  | 2.590438000  |
| Hf | -0.002884000 | 1.716826000  | -0.917810000 |
| Hf | -2.529550000 | -0.079236000 | 0.733091000  |
| Hf | 0.017169000  | -1.864130000 | -1.119550000 |
| C  | -2.032788000 | 0.018236000  | -5.125153000 |
| C  | -0.482003000 | -2.351195000 | -5.259962000 |
| C  | 0.351988000  | -1.654753000 | -4.434890000 |
| C  | -3.116435000 | -0.735518000 | -5.809859000 |
| C  | 1.663489000  | -1.059498000 | -4.869981000 |
| C  | -4.414878000 | 0.081640000  | -5.821957000 |
| H  | 2.472376000  | -1.794693000 | -4.712458000 |
| H  | -0.336054000 | -2.454293000 | -6.335808000 |
| H  | -1.233057000 | 0.436695000  | -5.782628000 |
| H  | -5.683013000 | -1.358499000 | -5.987601000 |
| H  | 1.649100000  | -0.847576000 | -5.956208000 |
| H  | 1.302927000  | 0.692276000  | -4.067653000 |
| H  | -4.251262000 | 1.034191000  | -6.351290000 |
| H  | -4.723648000 | 0.322172000  | -4.787797000 |
| H  | -1.582658000 | -2.876373000 | -3.802515000 |
| H  | -3.540422000 | -1.271319000 | -7.583977000 |
| H  | -0.904338000 | 1.128384000  | -3.462662000 |
| H  | -3.302496000 | -1.652462000 | -5.205474000 |
| O  | -2.101593000 | 0.294845000  | -3.927545000 |
| O  | 2.051525000  | 0.074581000  | -4.116080000 |
| O  | -5.396373000 | -0.617064000 | -6.542208000 |
| O  | 0.049874000  | -1.581818000 | -3.160648000 |
| O  | -1.522972000 | -3.061392000 | -4.765576000 |
| O  | -2.723956000 | -1.042557000 | -7.117336000 |

Hf-NU-1000 (-CH<sub>3</sub>) TS4

|   |              |              |              |
|---|--------------|--------------|--------------|
| C | -3.248200000 | -2.182800000 | -1.650100000 |
| C | -3.229700000 | -2.386600000 | 2.900000000  |
| C | -3.232300000 | 2.034300000  | 3.104000000  |
| C | 3.276900000  | 2.142000000  | 2.939200000  |

|   |              |              |              |
|---|--------------|--------------|--------------|
| C | 3.226900000  | 2.366300000  | -1.338700000 |
| C | 3.259300000  | -2.277900000 | -1.561500000 |
| C | -3.265300000 | 2.236100000  | -1.457300000 |
| C | 3.257200000  | -2.506600000 | 2.716400000  |
| H | 4.085775000  | 2.687888000  | 3.472374000  |
| H | 4.064598000  | -3.142654000 | 3.142407000  |
| H | -4.032753000 | 2.536427000  | 3.690595000  |
| H | -4.031839000 | -2.985569000 | 3.383976000  |
| C | 5.456255000  | -2.000165000 | -2.674769000 |
| C | -5.606543000 | -2.205406000 | -2.379751000 |
| C | 4.268419000  | -2.743397000 | -2.565499000 |
| C | -4.322882000 | -2.758805000 | -2.506071000 |
| C | 4.039281000  | -3.836140000 | -3.438850000 |
| C | -4.083085000 | -3.790050000 | -3.447200000 |
| C | 5.027778000  | -4.121230000 | -4.392956000 |
| C | -5.171142000 | -4.226266000 | -4.216273000 |
| C | 6.194058000  | -3.369158000 | -4.503715000 |
| C | -6.439732000 | -3.666453000 | -4.091985000 |
| C | 6.413364000  | -2.298722000 | -3.638208000 |
| C | -6.662731000 | -2.643345000 | -3.170165000 |
| C | 5.549962000  | 3.208059000  | -1.305896000 |
| C | -5.678278000 | 2.697529000  | -1.685640000 |
| C | 4.293180000  | 3.222069000  | -1.929609000 |
| C | -4.364747000 | 3.093575000  | -1.983920000 |
| C | 4.077080000  | 4.022805000  | -3.077159000 |
| C | -4.135108000 | 4.284430000  | -2.720209000 |
| C | 5.156404000  | 4.788520000  | -3.540844000 |
| C | -5.261073000 | 5.003514000  | -3.147048000 |
| C | 6.394096000  | 4.787480000  | -2.903168000 |
| C | -6.560963000 | 4.594974000  | -2.857558000 |
| C | 6.596101000  | 3.992463000  | -1.775960000 |
| C | -6.774238000 | 3.436581000  | -2.112663000 |
| H | 5.600791000  | -1.168637000 | -1.980827000 |
| H | -5.750472000 | -1.401515000 | -1.654890000 |
| H | 4.869318000  | -4.966099000 | -5.069088000 |
| H | -5.008078000 | -5.029025000 | -4.940482000 |
| H | 7.325771000  | -1.702962000 | -3.709402000 |
| H | -7.648108000 | -2.183336000 | -3.072190000 |
| H | 5.679444000  | 2.565579000  | -0.432244000 |
| H | -5.816851000 | 1.780658000  | -1.111033000 |
| H | 5.013844000  | 5.401920000  | -4.435058000 |
| H | -5.103222000 | 5.923076000  | -3.717197000 |
| H | 7.563915000  | 3.980587000  | -1.270091000 |
| H | -7.787163000 | 3.110831000  | -1.862855000 |
| H | -7.256815000 | -4.031103000 | -4.719569000 |
| H | 6.934163000  | -3.623971000 | -5.266026000 |

|   |              |              |              |
|---|--------------|--------------|--------------|
| H | -7.406705000 | 5.194157000  | -3.205045000 |
| H | 7.205719000  | 5.406193000  | -3.293972000 |
| H | -1.941279000 | -2.941478000 | 0.625159000  |
| H | -0.874402000 | 1.380848000  | 5.079533000  |
| H | -0.014015000 | 0.075077000  | 4.785619000  |
| H | 0.025855000  | 3.993444000  | 0.558566000  |
| H | 0.650498000  | 4.294702000  | 2.619704000  |
| H | 0.902632000  | 4.246001000  | -0.737803000 |
| H | 1.962100000  | -0.174709000 | 3.576626000  |
| H | -1.932016000 | 2.778491000  | 0.793719000  |
| H | -0.612258000 | -1.993556000 | 5.100050000  |
| H | 0.902964000  | -4.444461000 | 2.171240000  |
| H | 0.598394000  | -4.494190000 | -1.137901000 |
| H | -0.000002000 | -4.170189000 | 0.889938000  |
| O | -1.060799000 | -0.099441000 | 2.180812000  |
| O | -3.613274000 | 1.295481000  | 2.157950000  |
| O | -3.597608000 | 1.288374000  | -0.674895000 |
| O | -3.607961000 | -1.501723000 | 2.091571000  |
| O | -2.048397000 | -2.658833000 | 3.231328000  |
| O | 0.043922000  | -4.087978000 | 1.906794000  |
| O | 2.076761000  | -2.829106000 | 2.997608000  |
| O | 2.106522000  | -2.768371000 | -1.593098000 |
| O | 3.632365000  | -1.538739000 | 2.005951000  |
| O | 3.628477000  | -1.368493000 | -0.754886000 |
| O | 3.646037000  | 1.281868000  | 2.099947000  |
| O | 3.594586000  | 1.386081000  | -0.623324000 |
| O | 2.018073000  | 2.651759000  | -1.576687000 |
| O | 2.096480000  | 2.451981000  | 3.240320000  |
| O | 1.067337000  | 1.388338000  | 0.727062000  |
| O | 1.413541000  | -0.122847000 | 2.784268000  |
| O | 0.035751000  | -1.513388000 | 4.572776000  |
| O | -0.026508000 | 1.093243000  | 4.713635000  |
| O | 1.063752000  | -1.539530000 | 0.698018000  |
| O | -1.386242000 | -2.154365000 | 0.683868000  |
| O | -2.042502000 | -2.375550000 | -1.981928000 |
| O | -0.086942000 | -3.983671000 | -0.692801000 |
| O | -3.607904000 | -1.472235000 | -0.662469000 |
| O | -0.009999000 | 3.773349000  | 2.150269000  |
| O | 0.032628000  | 3.926741000  | -0.458294000 |
| O | -1.387355000 | 1.982587000  | 0.755314000  |
| O | -2.046061000 | 2.255924000  | 3.454776000  |
| O | -2.068973000 | 2.496044000  | -1.764098000 |
| O | 1.351032000  | -0.050919000 | -1.409956000 |
| O | -1.072085000 | -0.075831000 | -0.788763000 |
| H | 1.939206000  | -0.035452000 | -2.189873000 |
| O | -0.062239000 | 1.744125000  | -3.230197000 |

|    |              |              |              |
|----|--------------|--------------|--------------|
| H  | -0.860552000 | 2.213740000  | -3.519231000 |
| C  | -2.781697000 | 4.827728000  | -3.050637000 |
| H  | -2.145248000 | 4.931194000  | -2.162200000 |
| H  | -2.242499000 | 4.161924000  | -3.736606000 |
| H  | -2.873325000 | 5.809792000  | -3.532397000 |
| C  | 2.784289000  | 4.067042000  | -3.831739000 |
| H  | 2.367443000  | 3.068279000  | -4.014676000 |
| H  | 1.999320000  | 4.602623000  | -3.277839000 |
| H  | 2.919273000  | 4.577470000  | -4.794212000 |
| C  | 2.821787000  | -4.708223000 | -3.397768000 |
| H  | 2.667304000  | -5.143122000 | -2.400842000 |
| H  | 1.900592000  | -4.151602000 | -3.621853000 |
| H  | 2.916488000  | -5.532472000 | -4.116524000 |
| C  | -2.750848000 | -4.439184000 | -3.659947000 |
| H  | -2.039559000 | -3.753857000 | -4.143741000 |
| H  | -2.270148000 | -4.738607000 | -2.719704000 |
| H  | -2.855594000 | -5.323478000 | -4.301918000 |
| Hf | 2.530446000  | -0.079588000 | 0.684918000  |
| Hf | -0.014219000 | -1.869783000 | 2.501302000  |
| Hf | 0.036165000  | 1.703350000  | 2.502960000  |
| Hf | -0.031020000 | 1.697280000  | -1.072332000 |
| Hf | -2.526780000 | -0.085814000 | 0.704156000  |
| Hf | 0.030134000  | -1.909550000 | -1.071450000 |
| C  | -0.538861000 | -0.352501000 | -4.775460000 |
| C  | 0.515485000  | -1.134443000 | -4.270189000 |
| C  | 1.918870000  | -0.934297000 | -4.783227000 |
| H  | 2.325608000  | -1.931118000 | -5.030748000 |
| H  | -0.480608000 | 0.031179000  | -5.801777000 |
| H  | 1.900300000  | -0.339303000 | -5.712876000 |
| H  | 3.613408000  | -0.639364000 | -3.828085000 |
| H  | -1.776421000 | -1.302193000 | -3.644508000 |
| H  | -0.139390000 | 0.668242000  | -4.064781000 |
| O  | 2.710598000  | -0.294112000 | -3.798389000 |
| O  | 0.304007000  | -1.872846000 | -3.263843000 |
| O  | -1.817149000 | -0.658228000 | -4.379690000 |
| C  | -3.382956000 | 1.108201000  | -5.405875000 |
| C  | -4.564527000 | 0.481236000  | -4.710734000 |
| C  | -5.773897000 | 1.394588000  | -4.786431000 |
| H  | -3.069460000 | 0.562997000  | -6.335213000 |
| H  | -7.556398000 | 1.357899000  | -4.027688000 |
| H  | -6.062781000 | 1.521617000  | -5.849285000 |
| H  | -5.507578000 | 2.390501000  | -4.387766000 |
| H  | -5.574134000 | -1.146395000 | -4.853092000 |
| H  | -4.289921000 | 0.379322000  | -3.636592000 |
| O  | -2.838962000 | 2.121188000  | -5.037699000 |
| O  | -6.795786000 | 0.768497000  | -4.045557000 |

O -4.814412000 -0.758556000 -5.309018000

Hf-NU-1000 (-CH<sub>3</sub>) Prod

C -3.248214000 -2.182818000 -1.650130000  
C -3.229699000 -2.386590000 2.899991000  
C -3.232291000 2.034307000 3.103971000  
C 3.276893000 2.142007000 2.939200000  
C 3.226919000 2.366292000 -1.338712000  
C 3.259351000 -2.277925000 -1.561498000  
C -3.265358000 2.236127000 -1.457234000  
C 3.257199000 -2.506600000 2.716412000  
H 4.085536000 2.695774000 3.464275000  
H 4.062608000 -3.145637000 3.141596000  
H -4.032324000 2.545255000 3.683474000  
H -4.032028000 -2.968031000 3.403695000  
C 5.411144000 -1.957560000 -2.720137000  
C -5.658424000 -2.609566000 -2.006798000  
C 4.307401000 -2.791167000 -2.490056000  
C -4.337020000 -3.059523000 -2.172851000  
C 4.183703000 -4.014868000 -3.188172000  
C -4.093010000 -4.310460000 -2.791328000  
C 5.189805000 -4.345092000 -4.105085000  
C -5.204901000 -5.034803000 -3.244896000  
C 6.271214000 -3.500421000 -4.347941000  
C -6.506188000 -4.560268000 -3.115567000  
C 6.385068000 -2.298454000 -3.652244000  
C -6.738718000 -3.338215000 -2.486372000  
C 5.600568000 3.037663000 -1.481148000  
C -5.633712000 2.939516000 -1.568021000  
C 4.296076000 3.183333000 -1.978525000  
C -4.316470000 3.133674000 -2.013768000  
C 4.042404000 4.074091000 -3.050867000  
C -4.033991000 4.152757000 -2.959695000  
C 5.134378000 4.784436000 -3.570519000  
C -5.111909000 4.926609000 -3.413489000  
C 6.421971000 4.645612000 -3.060402000  
C -6.413570000 4.725736000 -2.963823000  
C 6.660435000 3.766266000 -2.005555000  
C -6.679712000 3.725427000 -2.030668000  
H 5.471974000 -1.020210000 -2.162300000  
H -5.821472000 -1.660290000 -1.495770000  
H 5.121064000 -5.297653000 -4.638265000  
H -5.032632000 -6.005788000 -3.717256000  
H 7.229578000 -1.630146000 -3.832242000  
H -7.754966000 -2.958766000 -2.362395000  
H 5.757761000 2.335223000 -0.660534000



|   |              |              |              |
|---|--------------|--------------|--------------|
| H | -5.816881000 | 2.145329000  | -0.842761000 |
| H | 4.959859000  | 5.466763000  | -4.407200000 |
| H | -4.913016000 | 5.714673000  | -4.144982000 |
| H | 7.666286000  | 3.646735000  | -1.597291000 |
| H | -7.696107000 | 3.556578000  | -1.669468000 |
| H | -7.341205000 | -5.153254000 | -3.496589000 |
| H | 7.031043000  | -3.788917000 | -5.078233000 |
| H | -7.221962000 | 5.354429000  | -3.345166000 |
| H | 7.241978000  | 5.224208000  | -3.493004000 |
| H | -1.942728000 | -2.933948000 | 0.581938000  |
| H | -0.875464000 | 1.361084000  | 5.094206000  |
| H | -0.012791000 | 0.060745000  | 4.790383000  |
| H | 0.007353000  | 4.010463000  | 0.590463000  |
| H | 0.642022000  | 4.298977000  | 2.649975000  |
| H | 0.862991000  | 4.310001000  | -0.709059000 |
| H | 1.960178000  | -0.192676000 | 3.576046000  |
| H | -1.939519000 | 2.796566000  | 0.830683000  |
| H | -0.594173000 | -2.023802000 | 5.099505000  |
| H | 0.895861000  | -4.434671000 | 2.108113000  |
| H | 0.633866000  | -4.412205000 | -1.210521000 |
| H | 0.004444000  | -4.136700000 | 0.828617000  |
| O | -1.063062000 | -0.103608000 | 2.181036000  |
| O | -3.617650000 | 1.294553000  | 2.159411000  |
| O | -3.638221000 | 1.317547000  | -0.656798000 |
| O | -3.607221000 | -1.513310000 | 2.075744000  |
| O | -2.046768000 | -2.665955000 | 3.218808000  |
| O | 0.034530000  | -4.081589000 | 1.844467000  |
| O | 2.073387000  | -2.846883000 | 2.971847000  |
| O | 2.059077000  | -2.623323000 | -1.781559000 |
| O | 3.631674000  | -1.519668000 | 2.036277000  |
| O | 3.615676000  | -1.457390000 | -0.670890000 |
| O | 3.646629000  | 1.282958000  | 2.100837000  |
| O | 3.594328000  | 1.383220000  | -0.622768000 |
| O | 2.020850000  | 2.686743000  | -1.529756000 |
| O | 2.096745000  | 2.443249000  | 3.251169000  |
| O | 1.065641000  | 1.403142000  | 0.753687000  |
| O | 1.407559000  | -0.131605000 | 2.787067000  |
| O | 0.040688000  | -1.533341000 | 4.565882000  |
| O | -0.028731000 | 1.077526000  | 4.722880000  |
| O | 1.057702000  | -1.552740000 | 0.695520000  |
| O | -1.407796000 | -2.132966000 | 0.644955000  |
| O | -2.057250000 | -2.354723000 | -2.037734000 |
| O | -0.066204000 | -3.915740000 | -0.773082000 |
| O | -3.593521000 | -1.318654000 | -0.780139000 |
| O | -0.019242000 | 3.777790000  | 2.181472000  |
| O | 0.007893000  | 3.956001000  | -0.427193000 |

|    |              |              |              |
|----|--------------|--------------|--------------|
| O  | -1.401315000 | 1.997604000  | 0.769526000  |
| O  | -2.048105000 | 2.245571000  | 3.461638000  |
| O  | -2.064222000 | 2.431808000  | -1.786387000 |
| O  | 1.399008000  | -0.029846000 | -1.313562000 |
| O  | -1.070211000 | -0.033147000 | -0.783743000 |
| H  | 1.928159000  | -0.012743000 | -2.136833000 |
| O  | 0.158905000  | 1.695313000  | -3.147483000 |
| H  | -0.581628000 | 1.532136000  | -3.746784000 |
| C  | -2.672338000 | 4.455422000  | -3.504814000 |
| H  | -1.961065000 | 4.731949000  | -2.714981000 |
| H  | -2.215133000 | 3.590723000  | -4.006831000 |
| H  | -2.727337000 | 5.279066000  | -4.228328000 |
| C  | 2.696413000  | 4.283254000  | -3.673394000 |
| H  | 2.186489000  | 3.341485000  | -3.910874000 |
| H  | 2.007771000  | 4.817468000  | -3.002301000 |
| H  | 2.788951000  | 4.877288000  | -4.591868000 |
| C  | 3.059567000  | -4.981080000 | -2.965900000 |
| H  | 2.868361000  | -5.148656000 | -1.896921000 |
| H  | 2.110069000  | -4.621711000 | -3.389736000 |
| H  | 3.284745000  | -5.952481000 | -3.424492000 |
| C  | -2.736757000 | -4.912926000 | -2.977660000 |
| H  | -2.225945000 | -4.471372000 | -3.846074000 |
| H  | -2.071500000 | -4.764718000 | -2.117578000 |
| H  | -2.825725000 | -5.988770000 | -3.178403000 |
| Hf | 2.528961000  | -0.066509000 | 0.698449000  |
| Hf | -0.019615000 | -1.873691000 | 2.494373000  |
| Hf | 0.035882000  | 1.705634000  | 2.514076000  |
| Hf | -0.014605000 | 1.741392000  | -1.074930000 |
| Hf | -2.526029000 | -0.059209000 | 0.706166000  |
| Hf | 0.027796000  | -1.820423000 | -1.074287000 |
| C  | 0.184681000  | -2.364043000 | -5.524772000 |
| C  | 0.717694000  | -1.444330000 | -4.467061000 |
| C  | 1.882602000  | -0.562149000 | -4.806171000 |
| H  | 2.727431000  | -1.246257000 | -5.025455000 |
| H  | 0.923436000  | -3.194636000 | -5.592793000 |
| H  | 1.642299000  | -0.086543000 | -5.778781000 |
| H  | 1.471740000  | 0.970361000  | -3.683063000 |
| H  | -1.280097000 | -2.704078000 | -4.304073000 |
| H  | 0.212549000  | -1.866148000 | -6.508271000 |
| O  | 2.256998000  | 0.346235000  | -3.842458000 |
| O  | 0.188367000  | -1.491448000 | -3.360933000 |
| O  | -1.097816000 | -2.809167000 | -5.257140000 |
| C  | -2.133366000 | -0.240633000 | -5.675585000 |
| C  | -3.044221000 | -0.531609000 | -4.523305000 |
| C  | -3.986081000 | 0.640061000  | -4.224813000 |
| H  | -2.454211000 | -0.691733000 | -6.649436000 |

|   |              |              |              |
|---|--------------|--------------|--------------|
| H | -4.474446000 | 0.229697000  | -2.373079000 |
| H | -4.569585000 | 0.892628000  | -5.124352000 |
| H | -3.395420000 | 1.531951000  | -3.949053000 |
| H | -4.569698000 | -1.655146000 | -4.248227000 |
| H | -2.391712000 | -0.652963000 | -3.628328000 |
| O | -1.137889000 | 0.448959000  | -5.588120000 |
| O | -4.908499000 | 0.253153000  | -3.243945000 |
| O | -3.778697000 | -1.683847000 | -4.809755000 |

## 5. Hf-MOF-808 case

## Hf-MOF-808

|    |              |              |              |
|----|--------------|--------------|--------------|
| C  | -3.448800000 | -1.965700000 | 2.156800000  |
| C  | 3.881700000  | 1.003300000  | -2.299800000 |
| C  | -3.841600000 | 1.392100000  | -0.254600000 |
| C  | 4.304100000  | -2.576300000 | 0.267700000  |
| C  | -3.369500000 | -2.356800000 | -1.985400000 |
| C  | 3.808500000  | 1.407600000  | 2.107100000  |
| H  | -1.266356000 | 2.583476000  | -0.404248000 |
| H  | 2.433138000  | -1.482337000 | -4.219102000 |
| H  | 0.958139000  | -4.277098000 | -1.437952000 |
| H  | 1.606867000  | -3.993742000 | -2.849297000 |
| H  | 0.319932000  | -1.014248000 | -4.070243000 |
| H  | -2.136947000 | 2.338032000  | -3.112646000 |
| H  | 0.148187000  | -4.895692000 | 1.479586000  |
| H  | 5.367970000  | 0.323372000  | 4.021999000  |
| C  | 6.917650000  | 1.826390000  | 4.227467000  |
| C  | 5.753894000  | 1.287712000  | 3.686316000  |
| H  | -5.354373000 | 2.482501000  | 1.705743000  |
| C  | -7.353018000 | 2.163830000  | 0.928946000  |
| C  | -5.963556000 | 2.102362000  | 0.882917000  |
| O  | -3.068195000 | -0.783036000 | 2.385518000  |
| H  | -5.458336000 | -0.274918000 | 2.694356000  |
| H  | 5.527896000  | -0.483985000 | -3.836953000 |
| C  | -4.853239000 | -2.327448000 | 2.490503000  |
| C  | -5.793847000 | -1.314177000 | 2.713912000  |
| C  | 5.136144000  | 1.446180000  | -2.973523000 |
| C  | 5.882253000  | 0.544541000  | -3.743245000 |
| O  | -2.734898000 | -2.856642000 | 1.599408000  |
| O  | -0.179495000 | -4.113873000 | 1.946680000  |
| O  | 1.047039000  | -2.150722000 | 0.228536000  |
| O  | 3.309043000  | 1.834462000  | -1.541149000 |
| O  | 0.881896000  | 2.933017000  | -2.195034000 |
| O  | -0.818125000 | 1.738692000  | -0.282607000 |
| Hf | -0.966141000 | -2.739649000 | 0.234429000  |
| Hf | 1.498973000  | 1.729042000  | -0.260176000 |

|    |              |              |              |
|----|--------------|--------------|--------------|
| H  | -8.640026000 | -3.160772000 | -2.629562000 |
| C  | -6.901679000 | -3.557370000 | -1.410764000 |
| C  | -7.563087000 | -3.015356000 | -2.513689000 |
| O  | 3.181205000  | 2.098612000  | 1.259099000  |
| O  | 1.176274000  | 3.682724000  | 0.254956000  |
| O  | -0.506714000 | -4.615724000 | -0.599417000 |
| H  | 8.412325000  | 2.603437000  | -4.716162000 |
| C  | 7.056401000  | 0.959024000  | -4.365367000 |
| C  | 7.491349000  | 2.277961000  | -4.226320000 |
| H  | 8.303571000  | 3.483050000  | 4.204478000  |
| C  | 6.694059000  | 3.758689000  | 2.790499000  |
| C  | 7.389089000  | 3.061564000  | 3.779995000  |
| H  | 9.249396000  | -4.661595000 | 0.602003000  |
| C  | 7.591816000  | -3.803601000 | 1.689063000  |
| C  | 8.243637000  | -4.239766000 | 0.534563000  |
| O  | -3.289126000 | 1.083433000  | -1.342295000 |
| H  | -4.915515000 | -1.487064000 | -4.030886000 |
| C  | -6.852204000 | -2.284367000 | -3.468206000 |
| C  | -5.484355000 | -2.080745000 | -3.311761000 |
| H  | -8.581528000 | -3.227482000 | 3.109566000  |
| C  | -7.131835000 | -1.637355000 | 2.923089000  |
| C  | -7.532346000 | -2.974158000 | 2.938348000  |
| H  | -5.568402000 | 0.577703000  | -2.135453000 |
| H  | 5.785996000  | -2.916760000 | 2.495471000  |
| C  | -5.321789000 | 1.537933000  | -0.227141000 |
| C  | -6.085470000 | 1.026250000  | -1.284037000 |
| C  | 5.672005000  | -3.160035000 | 0.361892000  |
| C  | 6.310088000  | -3.267523000 | 1.604233000  |
| O  | -3.225765000 | 1.529902000  | 0.856811000  |
| O  | 0.695778000  | 0.632923000  | 1.366179000  |
| O  | 3.819887000  | -2.409912000 | -0.890330000 |
| O  | 1.754230000  | -3.887793000 | -1.899504000 |
| O  | -0.319842000 | -2.056876000 | -1.901541000 |
| Hf | -1.381685000 | 0.491533000  | 1.529324000  |
| Hf | 1.901042000  | -1.537804000 | -1.622358000 |
| O  | 3.478805000  | -0.174441000 | -2.530369000 |
| O  | 1.714608000  | -1.867207000 | -3.703561000 |
| O  | -1.220899000 | 1.200968000  | 3.445185000  |
| H  | -0.609391000 | -2.617158000 | -2.630432000 |
| H  | 2.557583000  | -3.222973000 | 3.273173000  |
| H  | 0.369352000  | 0.436647000  | 3.903664000  |
| H  | 0.977765000  | -0.848230000 | 4.579086000  |
| H  | 0.581171000  | -3.714773000 | 2.466310000  |
| H  | -1.154474000 | -5.005977000 | -1.195964000 |
| H  | 4.986531000  | 3.456990000  | -2.230744000 |
| C  | 6.751845000  | 3.181132000  | -3.461093000 |

|   |              |              |              |
|---|--------------|--------------|--------------|
| C | 5.579739000  | 2.767623000  | -2.834563000 |
| O | 3.713098000  | -2.277332000 | 1.346378000  |
| O | 1.735154000  | -2.724369000 | 3.202613000  |
| O | -1.350933000 | 1.783929000  | -3.161808000 |
| H | -0.792644000 | -1.891470000 | 2.972538000  |
| H | 1.637715000  | 4.048394000  | 1.015846000  |
| H | 0.051123000  | 2.617362000  | -2.644927000 |
| H | 0.715526000  | 3.816401000  | -1.835593000 |
| H | -1.886665000 | 1.273025000  | 4.133962000  |
| H | -0.461271000 | 0.301502000  | -4.543991000 |
| H | 5.821711000  | -3.505042000 | -1.753862000 |
| C | 7.612573000  | -4.136256000 | -0.706055000 |
| C | 6.332669000  | -3.596414000 | -0.793621000 |
| H | -4.989800000 | -3.793294000 | -0.410706000 |
| H | 4.971032000  | 3.751592000  | 1.473958000  |
| C | -4.813777000 | -2.634663000 | -2.213842000 |
| C | -5.527736000 | -3.381290000 | -1.268093000 |
| C | 5.051008000  | 1.983790000  | 2.694604000  |
| C | 5.528439000  | 3.223462000  | 2.250138000  |
| O | -2.870337000 | -1.356896000 | -2.587652000 |
| O | -0.565689000 | -0.538246000 | -4.074847000 |
| O | 0.759062000  | 0.228042000  | -1.620855000 |
| O | 3.464993000  | 0.249576000  | 2.497594000  |
| O | 1.181879000  | -0.128740000 | 3.968571000  |
| O | -0.449639000 | -1.474138000 | 2.173615000  |
| H | -9.201479000 | 1.675188000  | -0.076873000 |
| C | -7.475775000 | 1.066095000  | -1.223852000 |
| C | -8.110148000 | 1.639194000  | -0.120746000 |
| H | -4.518040000 | -4.444357000 | 2.306747000  |
| C | -6.595033000 | -3.988931000 | 2.732834000  |
| C | -5.261794000 | -3.667253000 | 2.496363000  |
| O | -2.748254000 | -3.088994000 | -1.165171000 |
| H | 3.655679000  | -0.087489000 | 0.015110000  |
| O | -1.647414000 | -0.785379000 | -0.072042000 |
| O | 2.699281000  | -0.198082000 | 0.009743000  |
| H | 7.461974000  | 1.281970000  | 5.002513000  |
| H | 7.064750000  | 4.724476000  | 2.439600000  |
| H | 7.092808000  | 4.213336000  | -3.353274000 |
| H | 7.637501000  | 0.251697000  | -4.961521000 |
| H | 8.123281000  | -4.478343000 | -1.609092000 |
| H | 8.087704000  | -3.881573000 | 2.659285000  |
| H | -8.067457000 | 0.645146000  | -2.040087000 |
| H | -7.851585000 | 2.614045000  | 1.790743000  |
| H | -7.459180000 | -4.118934000 | -0.657416000 |
| H | -7.371599000 | -1.863444000 | -4.332661000 |
| H | -7.866529000 | -0.843037000 | 3.074545000  |

|    |              |              |              |
|----|--------------|--------------|--------------|
| H  | -6.909731000 | -5.035204000 | 2.748423000  |
| Hf | -1.291558000 | 0.068670000  | -1.951502000 |
| Hf | 1.818955000  | -1.090305000 | 1.880572000  |

## Hf-MOF-808 Ads

|    |              |              |              |
|----|--------------|--------------|--------------|
| C  | -3.448800000 | -1.965700000 | 2.156799000  |
| C  | 3.881700000  | 1.003300000  | -2.299800000 |
| C  | -3.841599000 | 1.392100000  | -0.254600000 |
| C  | 4.304100000  | -2.576300000 | 0.267700000  |
| C  | -3.369500000 | -2.356801000 | -1.985400000 |
| C  | 3.808500000  | 1.407600000  | 2.107100000  |
| H  | -1.245098000 | 2.573274000  | -0.381660000 |
| H  | 2.415248000  | -1.481441000 | -4.229997000 |
| H  | 0.924914000  | -4.273138000 | -1.437022000 |
| H  | 1.569718000  | -4.006135000 | -2.856855000 |
| H  | 0.293702000  | -0.992560000 | -4.056028000 |
| H  | -2.051676000 | 2.410308000  | -3.027840000 |
| H  | 0.135039000  | -4.900363000 | 1.444649000  |
| H  | 5.436804000  | 0.289681000  | 3.939066000  |
| C  | 6.839551000  | 1.899005000  | 4.317686000  |
| C  | 5.737430000  | 1.312311000  | 3.703094000  |
| H  | -5.300997000 | 2.358378000  | 1.801091000  |
| C  | -7.308570000 | 2.248261000  | 0.985534000  |
| C  | -5.924733000 | 2.105466000  | 0.939356000  |
| O  | -3.069412000 | -0.786052000 | 2.391539000  |
| H  | -5.437287000 | -0.265174000 | 2.741852000  |
| H  | 5.527029000  | -0.460025000 | -3.856654000 |
| C  | -4.861390000 | -2.318738000 | 2.462262000  |
| C  | -5.788158000 | -1.299686000 | 2.717531000  |
| C  | 5.130781000  | 1.459978000  | -2.972743000 |
| C  | 5.877518000  | 0.568948000  | -3.754339000 |
| O  | -2.724554000 | -2.860079000 | 1.618270000  |
| O  | -0.175218000 | -4.129974000 | 1.942694000  |
| O  | 1.057648000  | -2.157762000 | 0.229004000  |
| O  | 3.296198000  | 1.830684000  | -1.542462000 |
| O  | 0.883610000  | 2.965980000  | -2.143112000 |
| O  | -0.795273000 | 1.707515000  | -0.327836000 |
| Hf | -0.969144000 | -2.715430000 | 0.260050000  |
| Hf | 1.495180000  | 1.668458000  | -0.269189000 |
| H  | -8.544966000 | -3.426325000 | -2.939789000 |
| C  | -6.834108000 | -3.830424000 | -1.685113000 |
| C  | -7.485881000 | -3.225169000 | -2.760683000 |
| O  | 3.190103000  | 2.081297000  | 1.233287000  |
| O  | 1.066494000  | 3.598166000  | 0.506982000  |
| O  | -0.515602000 | -4.594547000 | -0.595098000 |
| H  | 8.396014000  | 2.647132000  | -4.715837000 |

|    |              |              |              |
|----|--------------|--------------|--------------|
| C  | 7.047282000  | 0.994302000  | -4.377084000 |
| C  | 7.478094000  | 2.313285000  | -4.225971000 |
| H  | 8.061803000  | 3.671827000  | 4.487266000  |
| C  | 6.453148000  | 3.934933000  | 3.070094000  |
| C  | 7.197973000  | 3.210742000  | 4.002091000  |
| H  | 9.291599000  | -4.560035000 | 0.590417000  |
| C  | 7.630729000  | -3.707960000 | 1.676976000  |
| C  | 8.277304000  | -4.158861000 | 0.525167000  |
| O  | -3.297097000 | 1.087116000  | -1.347959000 |
| H  | -4.886085000 | -1.396322000 | -4.003303000 |
| C  | -6.788457000 | -2.359977000 | -3.606365000 |
| C  | -5.444191000 | -2.088840000 | -3.369453000 |
| H  | -8.607983000 | -3.183601000 | 3.012283000  |
| C  | -7.132129000 | -1.610463000 | 2.905065000  |
| C  | -7.553373000 | -2.940299000 | 2.861136000  |
| H  | -5.597090000 | 0.860905000  | -2.214122000 |
| H  | 5.817841000  | -2.836048000 | 2.484143000  |
| C  | -5.311165000 | 1.612792000  | -0.220911000 |
| C  | -6.094432000 | 1.256137000  | -1.325703000 |
| C  | 5.683751000  | -3.132529000 | 0.358170000  |
| C  | 6.337928000  | -3.198753000 | 1.595166000  |
| O  | -3.223598000 | 1.484275000  | 0.857029000  |
| O  | 0.714322000  | 0.641068000  | 1.405308000  |
| O  | 3.810487000  | -2.430919000 | -0.889377000 |
| O  | 1.723076000  | -3.892901000 | -1.909010000 |
| O  | -0.334577000 | -2.035798000 | -1.879989000 |
| Hf | -1.374567000 | 0.549860000  | 1.605603000  |
| Hf | 1.901958000  | -1.559902000 | -1.628261000 |
| O  | 3.491680000  | -0.178655000 | -2.524885000 |
| O  | 1.703716000  | -1.867842000 | -3.706227000 |
| O  | -1.321934000 | 0.703403000  | 3.740130000  |
| H  | -0.640717000 | -2.592050000 | -2.605246000 |
| H  | 2.592786000  | -3.272358000 | 3.215720000  |
| H  | 0.343309000  | 0.206779000  | 4.014231000  |
| H  | 1.195385000  | -0.979388000 | 4.602307000  |
| H  | 0.598207000  | -3.748784000 | 2.453546000  |
| H  | -1.175462000 | -4.979624000 | -1.181607000 |
| H  | 4.979044000  | 3.463120000  | -2.207674000 |
| C  | 6.738765000  | 3.205639000  | -3.448094000 |
| C  | 5.570442000  | 2.781443000  | -2.821666000 |
| O  | 3.717392000  | -2.279754000 | 1.347651000  |
| O  | 1.772305000  | -2.766169000 | 3.189676000  |
| O  | -1.309600000 | 1.805466000  | -3.141079000 |
| H  | -0.734759000 | -1.927293000 | 2.984536000  |
| H  | 1.778802000  | 3.899939000  | 1.093429000  |
| H  | 0.073569000  | 2.602057000  | -2.612066000 |

|    |              |              |              |
|----|--------------|--------------|--------------|
| H  | 0.658779000  | 3.860845000  | -1.861577000 |
| H  | -1.850374000 | 0.011153000  | 4.156383000  |
| H  | -0.489987000 | 0.326566000  | -4.511143000 |
| H  | 5.816396000  | -3.522898000 | -1.751022000 |
| C  | 7.630375000  | -4.096127000 | -0.710015000 |
| C  | 6.339630000  | -3.582392000 | -0.794893000 |
| H  | -4.955403000 | -4.033287000 | -0.618343000 |
| H  | 4.754168000  | 3.902523000  | 1.725566000  |
| C  | -4.783508000 | -2.700334000 | -2.296380000 |
| C  | -5.483775000 | -3.578381000 | -1.459285000 |
| C  | 4.989055000  | 2.033285000  | 2.763132000  |
| C  | 5.353203000  | 3.349296000  | 2.450494000  |
| O  | -2.880972000 | -1.331792000 | -2.551669000 |
| O  | -0.589657000 | -0.518650000 | -4.050139000 |
| O  | 0.784437000  | 0.222260000  | -1.630841000 |
| O  | 3.487150000  | 0.237361000  | 2.476203000  |
| O  | 1.244501000  | -0.218006000 | 4.008788000  |
| O  | -0.423512000 | -1.493595000 | 2.182096000  |
| H  | -9.173780000 | 1.983620000  | -0.071792000 |
| C  | -7.479403000 | 1.382178000  | -1.268156000 |
| C  | -8.086515000 | 1.882059000  | -0.114869000 |
| H  | -4.555654000 | -4.431823000 | 2.201659000  |
| C  | -6.630405000 | -3.960864000 | 2.622508000  |
| C  | -5.289904000 | -3.651401000 | 2.413148000  |
| O  | -2.758890000 | -3.064744000 | -1.134983000 |
| H  | 3.654395000  | -0.086266000 | 0.022613000  |
| O  | -1.603644000 | -0.739993000 | -0.007202000 |
| O  | 2.700703000  | -0.217506000 | 0.005701000  |
| H  | 7.422272000  | 1.333785000  | 5.048673000  |
| H  | 6.730785000  | 4.963210000  | 2.828068000  |
| H  | 7.077106000  | 4.237477000  | -3.329582000 |
| H  | 7.628401000  | 0.295341000  | -4.982920000 |
| H  | 8.137165000  | -4.449627000 | -1.610840000 |
| H  | 8.139410000  | -3.753301000 | 2.642610000  |
| H  | -8.090007000 | 1.086052000  | -2.124441000 |
| H  | -7.786334000 | 2.637564000  | 1.887819000  |
| H  | -7.382573000 | -4.498206000 | -1.016540000 |
| H  | -7.300433000 | -1.889050000 | -4.449002000 |
| H  | -7.855337000 | -0.811232000 | 3.083424000  |
| H  | -6.962054000 | -5.001572000 | 2.591823000  |
| Hf | -1.299339000 | 0.091883000  | -1.911248000 |
| Hf | 1.826630000  | -1.111758000 | 1.885869000  |
| C  | -1.038285000 | 3.918314000  | 4.723364000  |
| C  | -2.248429000 | 3.902697000  | 3.769793000  |
| C  | -1.551266000 | 4.072078000  | 2.421458000  |
| C  | -0.023707000 | 4.811872000  | 3.999859000  |



|   |              |             |             |
|---|--------------|-------------|-------------|
| C | -2.357400000 | 4.534968000 | 1.225644000 |
| C | 1.370285000  | 4.243365000 | 3.821130000 |
| H | -3.267857000 | 3.925903000 | 1.146160000 |
| H | -2.845675000 | 4.820439000 | 3.939985000 |
| H | -0.654630000 | 2.886784000 | 4.783588000 |
| H | 1.481046000  | 5.424957000 | 2.319880000 |
| H | -2.657543000 | 5.584419000 | 1.390822000 |
| H | -0.684484000 | 4.555879000 | 0.203787000 |
| H | 1.295435000  | 3.200577000 | 3.450365000 |
| H | 1.893068000  | 4.202095000 | 4.789246000 |
| H | -2.516790000 | 2.014957000 | 3.937685000 |
| H | -0.116273000 | 3.076715000 | 1.538274000 |
| H | -1.777330000 | 5.143206000 | 6.024291000 |
| H | 0.038420000  | 5.799170000 | 4.490714000 |
| O | -1.318405000 | 4.294974000 | 6.042752000 |
| O | -1.630288000 | 4.385777000 | 0.022077000 |
| O | 2.122986000  | 5.046514000 | 2.938483000 |
| O | -0.897618000 | 2.836462000 | 2.124965000 |
| O | -3.091415000 | 2.813817000 | 3.883328000 |
| O | -0.571837000 | 5.049497000 | 2.681258000 |

## Hf-MOF-808 TS1

|   |              |              |              |
|---|--------------|--------------|--------------|
| C | -3.448800000 | -1.965700000 | 2.156800000  |
| C | 3.881700000  | 1.003300000  | -2.299800000 |
| C | -3.841600000 | 1.392100000  | -0.254600000 |
| C | 4.304100000  | -2.576300000 | 0.267700000  |
| C | -3.369500000 | -2.356800000 | -1.985400000 |
| C | 3.808500000  | 1.407600000  | 2.107100000  |
| H | -1.253024000 | 2.561214000  | -0.313686000 |
| H | 2.398617000  | -1.444879000 | -4.233076000 |
| H | 0.916446000  | -4.257780000 | -1.462653000 |
| H | 1.553662000  | -3.978842000 | -2.885745000 |
| H | 0.274186000  | -0.951015000 | -4.044128000 |
| H | -1.983376000 | 2.468094000  | -2.980071000 |
| H | 0.109747000  | -4.920784000 | 1.402819000  |
| H | 5.345538000  | 0.362195000  | 4.055333000  |
| C | 6.820381000  | 1.926841000  | 4.338576000  |
| C | 5.701081000  | 1.347405000  | 3.747761000  |
| H | -5.322013000 | 2.190757000  | 1.846148000  |
| C | -7.282912000 | 2.402095000  | 0.937544000  |
| C | -5.919950000 | 2.118583000  | 0.933351000  |
| O | -3.054958000 | -0.794705000 | 2.409631000  |
| H | -5.307189000 | -0.332148000 | 3.204495000  |
| H | 5.556608000  | -0.441767000 | -3.842085000 |
| C | -4.839849000 | -2.325795000 | 2.544485000  |
| C | -5.692952000 | -1.345237000 | 3.068267000  |

|    |              |              |              |
|----|--------------|--------------|--------------|
| C  | 5.120691000  | 1.478675000  | -2.978218000 |
| C  | 5.885599000  | 0.595300000  | -3.750757000 |
| O  | -2.747562000 | -2.852455000 | 1.579502000  |
| O  | -0.193581000 | -4.158928000 | 1.918231000  |
| O  | 1.065288000  | -2.168818000 | 0.224471000  |
| O  | 3.281271000  | 1.822570000  | -1.543562000 |
| O  | 0.881562000  | 3.062453000  | -1.994725000 |
| O  | -0.795645000 | 1.698205000  | -0.303349000 |
| Hf | -0.972009000 | -2.708104000 | 0.256266000  |
| Hf | 1.492784000  | 1.645417000  | -0.222609000 |
| H  | -8.369486000 | -3.790405000 | -3.334650000 |
| C  | -6.665850000 | -4.208229000 | -2.074418000 |
| C  | -7.348203000 | -3.506275000 | -3.069372000 |
| O  | 3.196900000  | 2.076518000  | 1.222267000  |
| O  | 0.882413000  | 3.500593000  | 0.763772000  |
| O  | -0.509622000 | -4.581193000 | -0.628380000 |
| H  | 8.358211000  | 2.716313000  | -4.737968000 |
| C  | 7.045786000  | 1.038732000  | -4.378968000 |
| C  | 7.448114000  | 2.368321000  | -4.243361000 |
| H  | 8.131704000  | 3.642383000  | 4.390215000  |
| C  | 6.560746000  | 3.872081000  | 2.925135000  |
| C  | 7.251936000  | 3.188730000  | 3.927191000  |
| H  | 9.297788000  | -4.552674000 | 0.555116000  |
| C  | 7.638991000  | -3.713958000 | 1.655226000  |
| C  | 8.282495000  | -4.152883000 | 0.497133000  |
| O  | -3.286135000 | 1.105938000  | -1.350939000 |
| H  | -4.931198000 | -1.235053000 | -3.873302000 |
| C  | -6.729459000 | -2.439375000 | -3.723325000 |
| C  | -5.431578000 | -2.071431000 | -3.381129000 |
| H  | -8.510080000 | -3.217022000 | 3.453625000  |
| C  | -7.008141000 | -1.666037000 | 3.391530000  |
| C  | -7.477104000 | -2.966679000 | 3.199688000  |
| H  | -5.533035000 | 1.291695000  | -2.347920000 |
| H  | 5.827402000  | -2.853885000 | 2.477004000  |
| C  | -5.291273000 | 1.724513000  | -0.256152000 |
| C  | -6.039147000 | 1.612111000  | -1.434852000 |
| C  | 5.686028000  | -3.130162000 | 0.348716000  |
| C  | 6.344930000  | -3.206436000 | 1.582589000  |
| O  | -3.249913000 | 1.411010000  | 0.867888000  |
| O  | 0.724066000  | 0.605730000  | 1.427754000  |
| O  | 3.803113000  | -2.435426000 | -0.885583000 |
| O  | 1.714680000  | -3.876046000 | -1.938059000 |
| O  | -0.339572000 | -2.011273000 | -1.881448000 |
| Hf | -1.373687000 | 0.556483000  | 1.656681000  |
| Hf | 1.900348000  | -1.553947000 | -1.627452000 |
| O  | 3.509475000  | -0.185748000 | -2.518265000 |

|   |              |              |              |
|---|--------------|--------------|--------------|
| O | 1.687216000  | -1.831800000 | -3.709644000 |
| O | -1.265367000 | 0.598185000  | 3.808817000  |
| H | -0.640592000 | -2.564584000 | -2.611016000 |
| H | 2.593792000  | -3.338846000 | 3.177391000  |
| H | 0.364361000  | 0.115219000  | 4.049415000  |
| H | 1.220806000  | -1.092134000 | 4.595259000  |
| H | 0.586584000  | -3.789965000 | 2.427730000  |
| H | -1.172700000 | -4.956984000 | -1.217167000 |
| H | 4.924569000  | 3.486433000  | -2.237341000 |
| C | 6.689827000  | 3.253396000  | -3.475436000 |
| C | 5.531581000  | 2.810975000  | -2.842936000 |
| O | 3.727019000  | -2.280890000 | 1.353195000  |
| O | 1.775950000  | -2.828042000 | 3.167670000  |
| O | -1.241293000 | 1.861583000  | -3.086025000 |
| H | -0.717972000 | -1.976861000 | 2.987605000  |
| H | 1.493193000  | 3.926961000  | 1.398392000  |
| H | 0.108440000  | 2.653603000  | -2.501063000 |
| H | 0.550791000  | 3.906294000  | -1.664448000 |
| H | -1.765340000 | -0.130148000 | 4.197313000  |
| H | -0.490725000 | 0.389354000  | -4.462406000 |
| H | 5.811690000  | -3.502438000 | -1.764152000 |
| C | 7.630853000  | -4.080376000 | -0.735021000 |
| C | 6.338640000  | -3.568824000 | -0.810545000 |
| H | -4.815479000 | -4.375192000 | -0.954219000 |
| H | 4.881137000  | 3.814815000  | 1.554169000  |
| C | -4.741042000 | -2.774598000 | -2.385856000 |
| C | -5.365293000 | -3.846597000 | -1.735587000 |
| C | 5.004296000  | 2.028296000  | 2.741436000  |
| C | 5.439988000  | 3.295909000  | 2.334935000  |
| O | -2.902706000 | -1.300245000 | -2.508957000 |
| O | -0.605727000 | -0.471064000 | -4.033001000 |
| O | 0.796746000  | 0.240208000  | -1.609162000 |
| O | 3.474963000  | 0.248589000  | 2.493447000  |
| O | 1.271801000  | -0.306066000 | 4.034558000  |
| O | -0.415880000 | -1.531599000 | 2.188202000  |
| H | -9.095509000 | 2.505691000  | -0.232885000 |
| C | -7.402696000 | 1.890588000  | -1.424726000 |
| C | -8.024716000 | 2.287379000  | -0.239585000 |
| H | -4.636483000 | -4.378635000 | 1.941571000  |
| C | -6.629629000 | -3.948058000 | 2.682266000  |
| C | -5.315492000 | -3.629119000 | 2.353080000  |
| O | -2.759446000 | -3.062067000 | -1.132762000 |
| H | 3.659811000  | -0.089857000 | 0.028268000  |
| O | -1.577498000 | -0.730005000 | 0.012361000  |
| O | 2.706857000  | -0.226765000 | 0.017944000  |
| H | 7.360775000  | 1.393497000  | 5.123975000  |

|    |              |              |              |
|----|--------------|--------------|--------------|
| H  | 6.899994000  | 4.859697000  | 2.604021000  |
| H  | 7.005318000  | 4.293909000  | -3.370128000 |
| H  | 7.641425000  | 0.345645000  | -4.977400000 |
| H  | 8.134940000  | -4.424880000 | -1.640847000 |
| H  | 8.150901000  | -3.767493000 | 2.618743000  |
| H  | -7.986476000 | 1.795727000  | -2.343268000 |
| H  | -7.772290000 | 2.710483000  | 1.864425000  |
| H  | -7.153690000 | -5.038514000 | -1.558369000 |
| H  | -7.265217000 | -1.890987000 | -4.501682000 |
| H  | -7.673469000 | -0.898202000 | 3.793089000  |
| H  | -6.998494000 | -4.965744000 | 2.533797000  |
| Hf | -1.303548000 | 0.114013000  | -1.881345000 |
| Hf | 1.830677000  | -1.144946000 | 1.894595000  |
| C  | -1.202641000 | 3.769243000  | 4.826776000  |
| C  | -2.375792000 | 3.705630000  | 3.834725000  |
| C  | -1.662745000 | 3.900138000  | 2.494352000  |
| C  | -0.149299000 | 4.612305000  | 4.086079000  |
| C  | -2.506230000 | 4.427996000  | 1.346688000  |
| C  | 1.198715000  | 3.916957000  | 3.980672000  |
| H  | -3.405750000 | 3.808030000  | 1.242200000  |
| H  | -3.016979000 | 4.595533000  | 3.994890000  |
| H  | -0.827731000 | 2.742305000  | 4.965531000  |
| H  | 2.146204000  | 5.493149000  | 3.325004000  |
| H  | -2.823889000 | 5.460181000  | 1.576642000  |
| H  | -0.894463000 | 4.664932000  | 0.299743000  |
| H  | 1.069040000  | 2.894237000  | 3.594072000  |
| H  | 1.631745000  | 3.822818000  | 4.994629000  |
| H  | -2.569539000 | 1.813107000  | 4.001234000  |
| H  | -0.033377000 | 3.119050000  | 1.452507000  |
| H  | -2.015016000 | 5.054101000  | 6.021021000  |
| H  | -0.020494000 | 5.584191000  | 4.598834000  |
| O  | -1.528001000 | 4.226738000  | 6.113121000  |
| O  | -1.801771000 | 4.367468000  | 0.118762000  |
| O  | 2.089646000  | 4.559450000  | 3.089823000  |
| O  | -0.984742000 | 2.737376000  | 2.126041000  |
| O  | -3.180800000 | 2.580536000  | 3.926993000  |
| O  | -0.697143000 | 4.904145000  | 2.796712000  |

## Hf-MOF-808 Int1

|   |              |              |              |
|---|--------------|--------------|--------------|
| C | -3.448800000 | -1.965700000 | 2.156800000  |
| C | 3.881700000  | 1.003300000  | -2.299800000 |
| C | -3.841600000 | 1.392100000  | -0.254600000 |
| C | 4.304100000  | -2.576300000 | 0.267700000  |
| C | -3.369500000 | -2.356800000 | -1.985400000 |
| C | 3.808500000  | 1.407600000  | 2.107100000  |
| H | -1.284824000 | 2.541993000  | -0.225909000 |

|    |              |              |              |
|----|--------------|--------------|--------------|
| H  | 2.388808000  | -1.433659000 | -4.232534000 |
| H  | 0.906388000  | -4.253961000 | -1.467587000 |
| H  | 1.542541000  | -3.975297000 | -2.892941000 |
| H  | 0.259788000  | -0.941091000 | -4.032790000 |
| H  | -1.972316000 | 2.455037000  | -3.016629000 |
| H  | 0.106425000  | -4.932202000 | 1.386073000  |
| H  | 5.346380000  | 0.377191000  | 4.060947000  |
| C  | 6.799480000  | 1.959584000  | 4.357782000  |
| C  | 5.691760000  | 1.367411000  | 3.758015000  |
| H  | -5.385782000 | 2.081190000  | 1.840477000  |
| C  | -7.269231000 | 2.540366000  | 0.863707000  |
| C  | -5.933608000 | 2.148603000  | 0.896528000  |
| O  | -3.032333000 | -0.814470000 | 2.455002000  |
| H  | -5.295306000 | -0.303209000 | 3.168248000  |
| H  | 5.575658000  | -0.434860000 | -3.827360000 |
| C  | -4.862563000 | -2.295324000 | 2.483556000  |
| C  | -5.706581000 | -1.300753000 | 2.995407000  |
| C  | 5.118800000  | 1.486136000  | -2.975515000 |
| C  | 5.895048000  | 0.605548000  | -3.739883000 |
| O  | -2.751134000 | -2.856187000 | 1.579820000  |
| O  | -0.192223000 | -4.175454000 | 1.911642000  |
| O  | 1.070901000  | -2.174664000 | 0.224643000  |
| O  | 3.272411000  | 1.818773000  | -1.545570000 |
| O  | 0.873680000  | 3.114642000  | -1.911075000 |
| O  | -0.785898000 | 1.704513000  | -0.272606000 |
| Hf | -0.971405000 | -2.703918000 | 0.265796000  |
| Hf | 1.493000000  | 1.622311000  | -0.207806000 |
| H  | -8.287275000 | -3.911895000 | -3.497654000 |
| C  | -6.600085000 | -4.311887000 | -2.209628000 |
| C  | -7.283603000 | -3.601032000 | -3.197379000 |
| O  | 3.192557000  | 2.074959000  | 1.221387000  |
| O  | 0.932109000  | 3.563842000  | 0.776038000  |
| O  | -0.509895000 | -4.574513000 | -0.636298000 |
| H  | 8.352931000  | 2.743751000  | -4.726813000 |
| C  | 7.054168000  | 1.056215000  | -4.364929000 |
| C  | 7.443672000  | 2.390161000  | -4.234618000 |
| H  | 8.088087000  | 3.691812000  | 4.422923000  |
| C  | 6.524323000  | 3.905275000  | 2.947846000  |
| C  | 7.217486000  | 3.228061000  | 3.952646000  |
| H  | 9.311490000  | -4.522091000 | 0.534028000  |
| C  | 7.649648000  | -3.699940000 | 1.642025000  |
| C  | 8.293518000  | -4.128564000 | 0.480295000  |
| O  | -3.263469000 | 1.148417000  | -1.353627000 |
| H  | -4.930893000 | -1.220661000 | -3.865271000 |
| C  | -6.688322000 | -2.491157000 | -3.799411000 |
| C  | -5.412687000 | -2.089942000 | -3.413386000 |

|    |              |              |              |
|----|--------------|--------------|--------------|
| H  | -8.590862000 | -3.094417000 | 3.224060000  |
| C  | -7.042613000 | -1.588618000 | 3.258529000  |
| C  | -7.541503000 | -2.869930000 | 3.017369000  |
| H  | -5.426956000 | 1.612468000  | -2.427383000 |
| H  | 5.834462000  | -2.856033000 | 2.472206000  |
| C  | -5.268604000 | 1.822049000  | -0.294023000 |
| C  | -5.956783000 | 1.885342000  | -1.512218000 |
| C  | 5.690059000  | -3.121878000 | 0.342745000  |
| C  | 6.352246000  | -3.200262000 | 1.574728000  |
| O  | -3.299083000 | 1.316775000  | 0.881374000  |
| O  | 0.737711000  | 0.597518000  | 1.448414000  |
| O  | 3.798300000  | -2.441448000 | -0.884110000 |
| O  | 1.705908000  | -3.873827000 | -1.945573000 |
| O  | -0.343703000 | -2.002451000 | -1.873803000 |
| Hf | -1.369637000 | 0.561774000  | 1.710847000  |
| Hf | 1.900298000  | -1.559399000 | -1.626117000 |
| O  | 3.516072000  | -0.188444000 | -2.516538000 |
| O  | 1.680296000  | -1.824435000 | -3.708072000 |
| O  | -1.216058000 | 0.521857000  | 3.869418000  |
| H  | -0.646208000 | -2.554083000 | -2.603958000 |
| H  | 2.607675000  | -3.370807000 | 3.156590000  |
| H  | 0.394653000  | 0.063803000  | 4.080032000  |
| H  | 1.270994000  | -1.144820000 | 4.597777000  |
| H  | 0.592121000  | -3.812681000 | 2.419038000  |
| H  | -1.177471000 | -4.943491000 | -1.224290000 |
| H  | 4.900133000  | 3.495975000  | -2.246870000 |
| C  | 6.673665000  | 3.272484000  | -3.475220000 |
| C  | 5.516628000  | 2.822926000  | -2.845544000 |
| O  | 3.732006000  | -2.283573000 | 1.355498000  |
| O  | 1.789930000  | -2.859902000 | 3.158353000  |
| O  | -1.203485000 | 1.876892000  | -3.064375000 |
| H  | -0.694583000 | -2.002802000 | 2.996779000  |
| H  | 1.495428000  | 3.990877000  | 1.464509000  |
| H  | 0.119539000  | 2.698686000  | -2.438643000 |
| H  | 0.490048000  | 3.898344000  | -1.494430000 |
| H  | -1.691453000 | -0.231336000 | 4.240518000  |
| H  | -0.490595000 | 0.415906000  | -4.415579000 |
| H  | 5.813646000  | -3.482717000 | -1.772321000 |
| C  | 7.638730000  | -4.053830000 | -0.750052000 |
| C  | 6.342989000  | -3.550479000 | -0.820129000 |
| H  | -4.772315000 | -4.452938000 | -1.050739000 |
| H  | 4.854940000  | 3.830352000  | 1.565484000  |
| C  | -4.720440000 | -2.802407000 | -2.425913000 |
| C  | -5.321782000 | -3.916517000 | -1.826861000 |
| C  | 4.993111000  | 2.041987000  | 2.748718000  |
| C  | 5.415084000  | 3.316256000  | 2.348559000  |

|    |              |              |              |
|----|--------------|--------------|--------------|
| O  | -2.915338000 | -1.282019000 | -2.483744000 |
| O  | -0.617707000 | -0.458756000 | -4.017900000 |
| O  | 0.801125000  | 0.243339000  | -1.597989000 |
| O  | 3.486568000  | 0.245158000  | 2.487233000  |
| O  | 1.309467000  | -0.349359000 | 4.049183000  |
| O  | -0.397965000 | -1.553725000 | 2.197604000  |
| H  | -8.998791000 | 2.908338000  | -0.377265000 |
| C  | -7.292981000 | 2.275052000  | -1.540939000 |
| C  | -7.949365000 | 2.604411000  | -0.353743000 |
| H  | -4.695040000 | -4.338050000 | 1.838426000  |
| C  | -6.703390000 | -3.864688000 | 2.510305000  |
| C  | -5.368083000 | -3.578610000 | 2.241538000  |
| O  | -2.761344000 | -3.060743000 | -1.131200000 |
| H  | 3.663110000  | -0.093213000 | 0.029569000  |
| O  | -1.565357000 | -0.725682000 | 0.032825000  |
| O  | 2.710786000  | -0.234717000 | 0.020336000  |
| H  | 7.341231000  | 1.431255000  | 5.145616000  |
| H  | 6.852711000  | 4.898181000  | 2.631844000  |
| H  | 6.979026000  | 4.316450000  | -3.374342000 |
| H  | 7.658979000  | 0.365413000  | -4.956771000 |
| H  | 8.143077000  | -4.390275000 | -1.658760000 |
| H  | 8.163824000  | -3.755382000 | 2.604223000  |
| H  | -7.829132000 | 2.318173000  | -2.491839000 |
| H  | -7.785588000 | 2.793285000  | 1.792707000  |
| H  | -7.069413000 | -5.176355000 | -1.734168000 |
| H  | -7.225129000 | -1.935174000 | -4.571579000 |
| H  | -7.700989000 | -0.810389000 | 3.651673000  |
| H  | -7.096371000 | -4.866645000 | 2.321888000  |
| Hf | -1.304851000 | 0.120451000  | -1.853184000 |
| Hf | 1.837032000  | -1.161374000 | 1.901794000  |
| C  | -1.218879000 | 3.680330000  | 4.885407000  |
| C  | -2.437868000 | 3.595270000  | 3.959122000  |
| C  | -1.801141000 | 3.780021000  | 2.571020000  |
| C  | -0.221224000 | 4.535867000  | 4.084764000  |
| C  | -2.780876000 | 4.294256000  | 1.529718000  |
| C  | 1.128603000  | 3.854270000  | 3.942262000  |
| H  | -3.700354000 | 3.690086000  | 1.615961000  |
| H  | -3.090548000 | 4.469846000  | 4.155988000  |
| H  | -0.821467000 | 2.659886000  | 5.007922000  |
| H  | 2.021230000  | 5.471541000  | 3.293282000  |
| H  | -3.027811000 | 5.346486000  | 1.752628000  |
| H  | -2.890592000 | 4.441440000  | -0.404711000 |
| H  | 0.997907000  | 2.845339000  | 3.519812000  |
| H  | 1.579380000  | 3.732004000  | 4.944540000  |
| H  | -2.579592000 | 1.699370000  | 4.114419000  |
| H  | 0.086092000  | 3.349374000  | 1.272319000  |

|   |              |             |             |
|---|--------------|-------------|-------------|
| H | -1.983138000 | 4.958229000 | 6.117611000 |
| H | -0.082380000 | 5.511633000 | 4.590062000 |
| O | -1.476390000 | 4.140668000 | 6.187424000 |
| O | -2.217595000 | 4.171226000 | 0.229603000 |
| O | 2.013459000  | 4.534375000 | 3.063711000 |
| O | -1.164273000 | 2.648205000 | 2.157093000 |
| O | -3.213412000 | 2.450673000 | 4.089618000 |
| O | -0.823895000 | 4.807544000 | 2.820934000 |

## Hf-MOF-808 TS2

|    |              |              |              |
|----|--------------|--------------|--------------|
| C  | -3.448800000 | -1.965700000 | 2.156800000  |
| C  | 3.881700000  | 1.003300000  | -2.299800000 |
| C  | -3.841600000 | 1.392100000  | -0.254600000 |
| C  | 4.304100000  | -2.576300000 | 0.267700000  |
| C  | -3.369500000 | -2.356800000 | -1.985400000 |
| C  | 3.808500000  | 1.407600000  | 2.107100000  |
| H  | -1.239457000 | 2.579980000  | -0.284107000 |
| H  | 2.426088000  | -1.493242000 | -4.226921000 |
| H  | 0.921299000  | -4.266444000 | -1.435945000 |
| H  | 1.566189000  | -3.996274000 | -2.855207000 |
| H  | 0.287869000  | -1.008347000 | -4.053207000 |
| H  | -2.058361000 | 2.382447000  | -3.079803000 |
| H  | 0.124766000  | -4.905862000 | 1.435634000  |
| H  | 5.401166000  | 0.376104000  | 4.025724000  |
| C  | 6.772423000  | 2.018334000  | 4.379986000  |
| C  | 5.699022000  | 1.390831000  | 3.754903000  |
| H  | -5.361146000 | 2.201410000  | 1.821248000  |
| C  | -7.265941000 | 2.574550000  | 0.852863000  |
| C  | -5.925152000 | 2.201271000  | 0.885618000  |
| O  | -3.054559000 | -0.798029000 | 2.419168000  |
| H  | -5.330282000 | -0.336664000 | 3.168942000  |
| H  | 5.615909000  | -0.437041000 | -3.780933000 |
| C  | -4.846869000 | -2.327821000 | 2.520097000  |
| C  | -5.712674000 | -1.349568000 | 3.025965000  |
| C  | 5.188123000  | 1.457023000  | -2.855775000 |
| C  | 5.977679000  | 0.578800000  | -3.609790000 |
| O  | -2.742713000 | -2.852967000 | 1.585723000  |
| O  | -0.180598000 | -4.137958000 | 1.940411000  |
| O  | 1.068081000  | -2.162035000 | 0.232469000  |
| O  | 3.208886000  | 1.853331000  | -1.636281000 |
| O  | 0.837142000  | 2.983123000  | -2.205588000 |
| O  | -0.788631000 | 1.719982000  | -0.364180000 |
| Hf | -0.966861000 | -2.707378000 | 0.267578000  |
| Hf | 1.463458000  | 1.688531000  | -0.233066000 |
| H  | -8.326952000 | -3.870175000 | -3.409735000 |
| C  | -6.638078000 | -4.256874000 | -2.119825000 |



|    |              |              |              |
|----|--------------|--------------|--------------|
| C  | -7.315397000 | -3.568170000 | -3.127388000 |
| O  | 3.188445000  | 2.066350000  | 1.224234000  |
| O  | 1.213461000  | 3.725943000  | 0.315768000  |
| O  | -0.517746000 | -4.587821000 | -0.600532000 |
| H  | 8.609749000  | 2.631394000  | -4.277013000 |
| C  | 7.202006000  | 1.000881000  | -4.119396000 |
| C  | 7.647589000  | 2.301513000  | -3.877770000 |
| H  | 7.961959000  | 3.815760000  | 4.519238000  |
| C  | 6.399003000  | 3.997057000  | 3.038716000  |
| C  | 7.122153000  | 3.322266000  | 4.023501000  |
| H  | 9.267845000  | -4.625847000 | 0.569034000  |
| C  | 7.614166000  | -3.772861000 | 1.665924000  |
| C  | 8.258666000  | -4.211217000 | 0.508194000  |
| O  | -3.284531000 | 1.096018000  | -1.346146000 |
| H  | -4.922985000 | -1.258376000 | -3.894679000 |
| C  | -6.703504000 | -2.492072000 | -3.772549000 |
| C  | -5.417899000 | -2.101710000 | -3.409020000 |
| H  | -8.533949000 | -3.225249000 | 3.356191000  |
| C  | -7.033793000 | -1.671497000 | 3.322885000  |
| C  | -7.496540000 | -2.973142000 | 3.122984000  |
| H  | -5.464304000 | 1.468737000  | -2.404846000 |
| H  | 5.810000000  | -2.893558000 | 2.483665000  |
| C  | -5.274595000 | 1.806643000  | -0.291209000 |
| C  | -5.983740000 | 1.787786000  | -1.498939000 |
| C  | 5.677832000  | -3.150313000 | 0.352532000  |
| C  | 6.327994000  | -3.246096000 | 1.589550000  |
| O  | -3.275431000 | 1.387818000  | 0.878272000  |
| O  | 0.727420000  | 0.630759000  | 1.413212000  |
| O  | 3.809806000  | -2.426110000 | -0.887727000 |
| O  | 1.721431000  | -3.887830000 | -1.907267000 |
| O  | -0.338724000 | -2.032298000 | -1.873967000 |
| Hf | -1.363036000 | 0.552443000  | 1.647545000  |
| Hf | 1.899636000  | -1.552216000 | -1.617600000 |
| O  | 3.523546000  | -0.185753000 | -2.521387000 |
| O  | 1.706438000  | -1.860127000 | -3.701076000 |
| O  | -1.266509000 | 0.651421000  | 3.793984000  |
| H  | -0.637716000 | -2.591969000 | -2.599408000 |
| H  | 2.604949000  | -3.300569000 | 3.183379000  |
| H  | 0.355184000  | 0.153993000  | 4.043104000  |
| H  | 1.248564000  | -1.015945000 | 4.609626000  |
| H  | 0.598316000  | -3.759873000 | 2.446546000  |
| H  | -1.178944000 | -4.964674000 | -1.190637000 |
| H  | 5.023520000  | 3.428875000  | -2.011389000 |
| C  | 6.868289000  | 3.179268000  | -3.122727000 |
| C  | 5.643026000  | 2.759985000  | -2.612304000 |
| O  | 3.727007000  | -2.273651000 | 1.349987000  |

|    |              |              |              |
|----|--------------|--------------|--------------|
| O  | 1.785530000  | -2.792253000 | 3.174994000  |
| O  | -1.318738000 | 1.774983000  | -3.187359000 |
| H  | -0.710660000 | -1.928978000 | 3.002962000  |
| H  | 0.894985000  | 4.236187000  | -0.440123000 |
| H  | 0.027885000  | 2.575127000  | -2.644238000 |
| H  | 1.556130000  | 2.889891000  | -2.842178000 |
| H  | -1.844493000 | 0.004666000  | 4.216707000  |
| H  | -0.545780000 | 0.279090000  | -4.523481000 |
| H  | 5.811031000  | -3.506667000 | -1.762350000 |
| C  | 7.615738000  | -4.119145000 | -0.727234000 |
| C  | 6.331300000  | -3.588775000 | -0.806265000 |
| H  | -4.802949000 | -4.392786000 | -0.970676000 |
| H  | 4.744440000  | 3.888065000  | 1.643637000  |
| C  | -4.732136000 | -2.791808000 | -2.401490000 |
| C  | -5.349469000 | -3.873118000 | -1.760236000 |
| C  | 4.972837000  | 2.063182000  | 2.763340000  |
| C  | 5.329474000  | 3.370161000  | 2.406010000  |
| O  | -2.905926000 | -1.302384000 | -2.513832000 |
| O  | -0.607079000 | -0.556983000 | -4.040682000 |
| O  | 0.790627000  | 0.225217000  | -1.620084000 |
| O  | 3.500383000  | 0.236488000  | 2.485261000  |
| O  | 1.268542000  | -0.254411000 | 4.015003000  |
| O  | -0.412252000 | -1.509264000 | 2.188409000  |
| H  | -9.020627000 | 2.842513000  | -0.378424000 |
| C  | -7.325098000 | 2.159022000  | -1.529092000 |
| C  | -7.967112000 | 2.553359000  | -0.354081000 |
| H  | -4.628391000 | -4.380003000 | 1.922103000  |
| C  | -6.636635000 | -3.953022000 | 2.623705000  |
| C  | -5.316750000 | -3.631856000 | 2.320271000  |
| O  | -2.764001000 | -3.054083000 | -1.123728000 |
| H  | 3.659807000  | -0.079427000 | 0.031413000  |
| O  | -1.577436000 | -0.731136000 | 0.007182000  |
| O  | 2.705802000  | -0.204920000 | 0.001529000  |
| H  | 7.337655000  | 1.492754000  | 5.153136000  |
| H  | 6.666429000  | 5.020405000  | 2.765253000  |
| H  | 7.220649000  | 4.194692000  | -2.928278000 |
| H  | 7.815340000  | 0.313062000  | -4.705856000 |
| H  | 8.120593000  | -4.463215000 | -1.632854000 |
| H  | 8.119134000  | -3.841658000 | 2.632137000  |
| H  | -7.876385000 | 2.137475000  | -2.472014000 |
| H  | -7.770025000 | 2.880023000  | 1.772792000  |
| H  | -7.120117000 | -5.094942000 | -1.610911000 |
| H  | -7.235075000 | -1.954058000 | -4.560970000 |
| H  | -7.708623000 | -0.904143000 | 3.709498000  |
| H  | -7.000397000 | -4.971588000 | 2.468761000  |
| Hf | -1.298054000 | 0.092345000  | -1.894410000 |

|    |              |              |              |
|----|--------------|--------------|--------------|
| Hf | 1.837869000  | -1.118038000 | 1.890819000  |
| C  | 0.081856000  | 4.030678000  | 4.330547000  |
| C  | -1.394341000 | 4.068125000  | 3.929952000  |
| C  | -1.406449000 | 3.833444000  | 2.424138000  |
| C  | 0.777364000  | 5.003427000  | 3.381048000  |
| C  | -2.391864000 | 4.578102000  | 1.562848000  |
| C  | 2.266549000  | 4.760945000  | 3.271265000  |
| H  | -3.390748000 | 4.210259000  | 1.870789000  |
| H  | -1.792791000 | 5.077534000  | 4.159301000  |
| H  | 0.455587000  | 3.007786000  | 4.135891000  |
| H  | 2.852906000  | 6.571502000  | 2.931581000  |
| H  | -2.344769000 | 5.660042000  | 1.771537000  |
| H  | -2.873418000 | 4.592761000  | -0.320521000 |
| H  | 2.436440000  | 3.788629000  | 2.784070000  |
| H  | 2.672090000  | 4.683502000  | 4.299244000  |
| H  | -1.842119000 | 2.237868000  | 4.366585000  |
| H  | 0.682751000  | 4.344043000  | 1.342453000  |
| H  | -0.221753000 | 5.031078000  | 5.954436000  |
| H  | 0.608945000  | 6.031898000  | 3.773082000  |
| O  | 0.329052000  | 4.286793000  | 5.683931000  |
| O  | -2.128607000 | 4.287203000  | 0.207869000  |
| O  | 2.944291000  | 5.717204000  | 2.495682000  |
| O  | -1.102066000 | 2.666716000  | 2.064649000  |
| O  | -2.197991000 | 3.138325000  | 4.576198000  |
| O  | 0.106966000  | 4.900949000  | 2.134423000  |

## Hf-MOF-808 Int2

|   |              |              |              |
|---|--------------|--------------|--------------|
| C | -3.448800000 | -1.965700000 | 2.156800000  |
| C | 3.881700000  | 1.003300000  | -2.299800000 |
| C | -3.841600000 | 1.392100000  | -0.254600000 |
| C | 4.304100000  | -2.576300000 | 0.267700000  |
| C | -3.369500000 | -2.356800000 | -1.985400000 |
| C | 3.808500000  | 1.407600000  | 2.107100000  |
| H | -1.254137000 | 2.552390000  | -0.398565000 |
| H | 2.439651000  | -1.500954000 | -4.225242000 |
| H | 0.941468000  | -4.279104000 | -1.425605000 |
| H | 1.596662000  | -4.015823000 | -2.839900000 |
| H | 0.313135000  | -1.020398000 | -4.070580000 |
| H | -2.107003000 | 2.365239000  | -3.069042000 |
| H | 0.138436000  | -4.894182000 | 1.460003000  |
| H | 5.179664000  | 0.488149000  | 4.234013000  |
| C | 6.811299000  | 1.911551000  | 4.355433000  |
| C | 5.650356000  | 1.375570000  | 3.806574000  |
| H | -5.279475000 | 2.361561000  | 1.814375000  |
| C | -7.256353000 | 2.508148000  | 0.933411000  |
| C | -5.894426000 | 2.220012000  | 0.921961000  |

|    |              |              |              |
|----|--------------|--------------|--------------|
| O  | -3.078429000 | -0.780143000 | 2.366335000  |
| H  | -5.359762000 | -0.343121000 | 3.124893000  |
| H  | 5.562806000  | -0.470760000 | -3.809827000 |
| C  | -4.826211000 | -2.351061000 | 2.570679000  |
| C  | -5.711914000 | -1.373461000 | 3.042326000  |
| C  | 5.128229000  | 1.463479000  | -2.977130000 |
| C  | 5.895387000  | 0.566231000  | -3.731004000 |
| O  | -2.737401000 | -2.853036000 | 1.589570000  |
| O  | -0.175125000 | -4.120104000 | 1.950282000  |
| O  | 1.059157000  | -2.158049000 | 0.228460000  |
| O  | 3.300516000  | 1.830566000  | -1.538780000 |
| O  | 0.882292000  | 2.873137000  | -2.283738000 |
| O  | -0.810175000 | 1.683376000  | -0.394547000 |
| Hf | -0.971204000 | -2.722824000 | 0.249386000  |
| Hf | 1.457761000  | 1.701516000  | -0.299044000 |
| H  | -8.519881000 | -3.528360000 | -2.965379000 |
| C  | -6.782391000 | -3.964796000 | -1.758838000 |
| C  | -7.467627000 | -3.300931000 | -2.777775000 |
| O  | 3.172930000  | 2.121683000  | 1.270767000  |
| O  | 1.138642000  | 3.709963000  | 0.185639000  |
| O  | -0.512399000 | -4.607088000 | -0.588083000 |
| H  | 8.384179000  | 2.662853000  | -4.730038000 |
| C  | 7.062577000  | 0.995724000  | -4.356142000 |
| C  | 7.469082000  | 2.325610000  | -4.237195000 |
| H  | 8.309401000  | 3.461189000  | 4.214844000  |
| C  | 6.816901000  | 3.641091000  | 2.664843000  |
| C  | 7.395905000  | 3.043533000  | 3.784907000  |
| H  | 9.221785000  | -4.724960000 | 0.612127000  |
| C  | 7.586796000  | -3.815213000 | 1.691306000  |
| C  | 8.222009000  | -4.289485000 | 0.542566000  |
| O  | -3.315145000 | 1.033606000  | -1.338635000 |
| H  | -4.947425000 | -1.288749000 | -3.894769000 |
| C  | -6.812765000 | -2.342946000 | -3.554130000 |
| C  | -5.475598000 | -2.044478000 | -3.309636000 |
| H  | -8.469385000 | -3.310591000 | 3.522154000  |
| C  | -7.017652000 | -1.717742000 | 3.379621000  |
| C  | -7.444196000 | -3.041011000 | 3.256759000  |
| H  | -5.574069000 | 1.159474000  | -2.296465000 |
| H  | 5.801293000  | -2.882291000 | 2.490837000  |
| C  | -5.290246000 | 1.734486000  | -0.245817000 |
| C  | -6.062585000 | 1.541614000  | -1.397976000 |
| C  | 5.665176000  | -3.175911000 | 0.364650000  |
| C  | 6.312201000  | -3.262743000 | 1.604026000  |
| O  | -3.224796000 | 1.486126000  | 0.857251000  |
| O  | 0.710169000  | 0.658084000  | 1.388077000  |
| O  | 3.820409000  | -2.414237000 | -0.890529000 |

|    |              |              |              |
|----|--------------|--------------|--------------|
| O  | 1.741981000  | -3.899287000 | -1.891129000 |
| O  | -0.326778000 | -2.055521000 | -1.889534000 |
| Hf | -1.371200000 | 0.539857000  | 1.576108000  |
| Hf | 1.903739000  | -1.553970000 | -1.629611000 |
| O  | 3.495564000  | -0.179627000 | -2.524339000 |
| O  | 1.726187000  | -1.888308000 | -3.704819000 |
| O  | -1.371037000 | 0.753557000  | 3.713758000  |
| H  | -0.624071000 | -2.615678000 | -2.615448000 |
| H  | 2.590218000  | -3.232471000 | 3.235330000  |
| H  | 0.299788000  | 0.241772000  | 3.995472000  |
| H  | 1.167623000  | -0.924349000 | 4.596355000  |
| H  | 0.594977000  | -3.733530000 | 2.459922000  |
| H  | -1.161885000 | -4.996533000 | -1.183085000 |
| H  | 4.932520000  | 3.483374000  | -2.269889000 |
| C  | 6.707903000  | 3.224994000  | -3.488910000 |
| C  | 5.543278000  | 2.796189000  | -2.858624000 |
| O  | 3.720544000  | -2.260930000 | 1.345484000  |
| O  | 1.767585000  | -2.730276000 | 3.200756000  |
| O  | -1.380002000 | 1.747585000  | -3.206115000 |
| H  | -0.734536000 | -1.911103000 | 2.987128000  |
| H  | 1.622320000  | 4.107698000  | 0.921459000  |
| H  | 0.045530000  | 2.544868000  | -2.719724000 |
| H  | 0.734148000  | 3.795021000  | -2.037130000 |
| H  | -1.918307000 | 0.080079000  | 4.136319000  |
| H  | -0.500986000 | 0.270930000  | -4.556608000 |
| H  | 5.791604000  | -3.574543000 | -1.743131000 |
| C  | 7.581906000  | -4.206813000 | -0.694970000 |
| C  | 6.309617000  | -3.649644000 | -0.785270000 |
| H  | -4.888137000 | -4.172519000 | -0.719911000 |
| H  | 5.191601000  | 3.567112000  | 1.238218000  |
| C  | -4.781742000 | -2.712380000 | -2.292738000 |
| C  | -5.441981000 | -3.676075000 | -1.519752000 |
| C  | 5.057307000  | 1.977708000  | 2.689274000  |
| C  | 5.649826000  | 3.113310000  | 2.120585000  |
| O  | -2.881947000 | -1.341257000 | -2.564482000 |
| O  | -0.577014000 | -0.560665000 | -4.067913000 |
| O  | 0.783556000  | 0.210498000  | -1.649204000 |
| O  | 3.463925000  | 0.256933000  | 2.492122000  |
| O  | 1.209268000  | -0.166645000 | 3.997292000  |
| O  | -0.431117000 | -1.484570000 | 2.177899000  |
| H  | -9.093151000 | 2.527848000  | -0.203165000 |
| C  | -7.425448000 | 1.822826000  | -1.380855000 |
| C  | -8.022989000 | 2.306953000  | -0.215928000 |
| H  | -4.557881000 | -4.425808000 | 2.074940000  |
| C  | -6.563594000 | -4.020657000 | 2.793991000  |
| C  | -5.259923000 | -3.677314000 | 2.448133000  |

|    |              |              |              |
|----|--------------|--------------|--------------|
| O  | -2.753370000 | -3.067567000 | -1.140741000 |
| H  | 3.646959000  | -0.075136000 | 0.003600000  |
| O  | -1.597258000 | -0.755462000 | -0.026876000 |
| O  | 2.691398000  | -0.190970000 | 0.009166000  |
| H  | 7.265738000  | 1.445052000  | 5.232318000  |
| H  | 7.278751000  | 4.521887000  | 2.213739000  |
| H  | 7.025551000  | 4.266277000  | -3.398242000 |
| H  | 7.660226000  | 0.291514000  | -4.939433000 |
| H  | 8.079417000  | -4.579089000 | -1.593423000 |
| H  | 8.089920000  | -3.876669000 | 2.658988000  |
| H  | -8.027258000 | 1.661725000  | -2.278373000 |
| H  | -7.725361000 | 2.888743000  | 1.843809000  |
| H  | -7.298654000 | -4.706162000 | -1.144348000 |
| H  | -7.351573000 | -1.823823000 | -4.350365000 |
| H  | -7.708408000 | -0.950734000 | 3.737339000  |
| H  | -6.898416000 | -5.056557000 | 2.701063000  |
| Hf | -1.301037000 | 0.072777000  | -1.938539000 |
| Hf | 1.810383000  | -1.097123000 | 1.871820000  |
| C  | -0.635057000 | 3.961286000  | 4.629619000  |
| C  | -1.903748000 | 4.091334000  | 3.758444000  |
| C  | -1.603386000 | 3.828591000  | 2.301345000  |
| C  | 0.584291000  | 4.675901000  | 4.025648000  |
| C  | -2.058075000 | 4.725055000  | 1.190989000  |
| C  | 1.636410000  | 3.696059000  | 3.532177000  |
| H  | -3.152176000 | 4.567770000  | 1.113211000  |
| H  | -2.332063000 | 5.101171000  | 3.883474000  |
| H  | -0.420363000 | 2.879741000  | 4.680110000  |
| H  | 3.052156000  | 3.786913000  | 2.209338000  |
| H  | -1.921017000 | 5.779423000  | 1.491891000  |
| H  | -0.484440000 | 4.295797000  | 0.114541000  |
| H  | 1.165539000  | 2.887252000  | 2.940652000  |
| H  | 2.128725000  | 3.217938000  | 4.400256000  |
| H  | -2.439633000 | 2.276825000  | 4.104223000  |
| H  | 0.960475000  | 5.700165000  | 2.443798000  |
| H  | -1.147927000 | 5.269604000  | 5.959834000  |
| H  | 1.030627000  | 5.309688000  | 4.817219000  |
| O  | -0.902250000 | 4.336631000  | 5.955912000  |
| O  | -1.465599000 | 4.410750000  | -0.028053000 |
| O  | 2.551333000  | 4.430023000  | 2.741211000  |
| O  | -1.068964000 | 2.760326000  | 2.022624000  |
| O  | -2.878512000 | 3.158646000  | 4.141735000  |
| O  | 0.157396000  | 5.500383000  | 2.950221000  |

Hf-MOF-808 Int2\_Ro

|   |              |              |              |
|---|--------------|--------------|--------------|
| C | -3.448800000 | -1.965700000 | 2.156800000  |
| C | 3.881700000  | 1.003300000  | -2.299800000 |

|    |              |              |              |
|----|--------------|--------------|--------------|
| C  | -3.841600000 | 1.392100000  | -0.254600000 |
| C  | 4.304100000  | -2.576300000 | 0.267700000  |
| C  | -3.369500000 | -2.356800000 | -1.985400000 |
| C  | 3.808500000  | 1.407600000  | 2.107100000  |
| H  | -1.232542000 | 2.590703000  | -0.350310000 |
| H  | 2.418034000  | -1.477301000 | -4.215699000 |
| H  | 0.932311000  | -4.265835000 | -1.430513000 |
| H  | 1.587229000  | -3.992831000 | -2.844259000 |
| H  | 0.296877000  | -0.998576000 | -4.050841000 |
| H  | -2.046386000 | 2.409004000  | -3.037777000 |
| H  | 0.119773000  | -4.903289000 | 1.440710000  |
| H  | 5.515424000  | 0.199290000  | 3.799915000  |
| C  | 7.085114000  | 1.686973000  | 3.987194000  |
| C  | 5.884211000  | 1.181512000  | 3.497545000  |
| H  | -5.380083000 | 2.250509000  | 1.790271000  |
| C  | -7.327359000 | 2.378179000  | 0.844721000  |
| C  | -5.958791000 | 2.126146000  | 0.872472000  |
| O  | -3.061560000 | -0.791888000 | 2.408268000  |
| H  | -5.337511000 | -0.352726000 | 3.189950000  |
| H  | 5.496929000  | -0.445443000 | -3.900115000 |
| C  | -4.837140000 | -2.340706000 | 2.541972000  |
| C  | -5.707943000 | -1.371054000 | 3.055624000  |
| C  | 5.113047000  | 1.468951000  | -2.999880000 |
| C  | 5.845134000  | 0.584775000  | -3.802565000 |
| O  | -2.743431000 | -2.847816000 | 1.577900000  |
| O  | -0.188116000 | -4.131914000 | 1.938706000  |
| O  | 1.060427000  | -2.149513000 | 0.238391000  |
| O  | 3.313139000  | 1.823018000  | -1.518129000 |
| O  | 0.913984000  | 2.897445000  | -2.225208000 |
| O  | -0.785349000 | 1.725959000  | -0.342817000 |
| Hf | -0.969358000 | -2.711793000 | 0.256803000  |
| Hf | 1.475906000  | 1.691170000  | -0.240636000 |
| H  | -8.419683000 | -3.713310000 | -3.223898000 |
| C  | -6.714191000 | -4.120987000 | -1.962807000 |
| C  | -7.387835000 | -3.446662000 | -2.982453000 |
| O  | 3.167435000  | 2.115541000  | 1.279945000  |
| O  | 1.243116000  | 3.730804000  | 0.364678000  |
| O  | -0.512255000 | -4.591246000 | -0.600957000 |
| H  | 8.330166000  | 2.678385000  | -4.816930000 |
| C  | 6.997721000  | 1.017953000  | -4.451650000 |
| C  | 7.426101000  | 2.338258000  | -4.306089000 |
| H  | 8.462398000  | 3.352873000  | 3.983964000  |
| C  | 6.756902000  | 3.713202000  | 2.708555000  |
| C  | 7.521151000  | 2.955531000  | 3.596750000  |
| H  | 9.224019000  | -4.726468000 | 0.579005000  |
| C  | 7.577576000  | -3.858652000 | 1.675251000  |

|    |              |              |              |
|----|--------------|--------------|--------------|
| C  | 8.223855000  | -4.290884000 | 0.516132000  |
| O  | -3.273522000 | 1.096054000  | -1.339951000 |
| H  | -4.918168000 | -1.284048000 | -3.914670000 |
| C  | -6.746444000 | -2.429726000 | -3.692000000 |
| C  | -5.435528000 | -2.082599000 | -3.379172000 |
| H  | -8.502973000 | -3.278124000 | 3.426336000  |
| C  | -7.021406000 | -1.707584000 | 3.369987000  |
| C  | -7.471488000 | -3.014956000 | 3.179623000  |
| H  | -5.493211000 | 1.192985000  | -2.366209000 |
| H  | 5.782681000  | -2.958467000 | 2.491197000  |
| C  | -5.298198000 | 1.701556000  | -0.287671000 |
| C  | -6.023399000 | 1.530977000  | -1.473636000 |
| C  | 5.665727000  | -3.177013000 | 0.355161000  |
| C  | 6.302891000  | -3.305194000 | 1.596048000  |
| O  | -3.266340000 | 1.432094000  | 0.876000000  |
| O  | 0.704657000  | 0.656202000  | 1.424457000  |
| O  | 3.816104000  | -2.408375000 | -0.887994000 |
| O  | 1.733434000  | -3.882645000 | -1.894897000 |
| O  | -0.333623000 | -2.031303000 | -1.876744000 |
| Hf | -1.380793000 | 0.541116000  | 1.619549000  |
| Hf | 1.900091000  | -1.544421000 | -1.615215000 |
| O  | 3.490897000  | -0.177912000 | -2.522420000 |
| O  | 1.704701000  | -1.863727000 | -3.694472000 |
| O  | -1.253534000 | 0.746751000  | 3.730483000  |
| H  | -0.627825000 | -2.589242000 | -2.605606000 |
| H  | 2.593788000  | -3.287654000 | 3.190758000  |
| H  | 0.324815000  | 0.179683000  | 4.040174000  |
| H  | 1.154550000  | -1.047773000 | 4.593242000  |
| H  | 0.586987000  | -3.752524000 | 2.448523000  |
| H  | -1.167437000 | -4.971075000 | -1.195982000 |
| H  | 4.970000000  | 3.468037000  | -2.224538000 |
| C  | 6.701489000  | 3.224088000  | -3.507108000 |
| C  | 5.550614000  | 2.791622000  | -2.854603000 |
| O  | 3.726599000  | -2.265770000 | 1.349674000  |
| O  | 1.773281000  | -2.781091000 | 3.179392000  |
| O  | -1.322768000 | 1.786523000  | -3.171308000 |
| H  | -0.747571000 | -1.904976000 | 2.996752000  |
| H  | 2.103465000  | 4.132240000  | 0.538903000  |
| H  | 0.088953000  | 2.545292000  | -2.673866000 |
| H  | 0.754391000  | 3.833174000  | -2.059655000 |
| H  | -1.890800000 | 0.227311000  | 4.234057000  |
| H  | -0.509676000 | 0.304767000  | -4.520191000 |
| H  | 5.810175000  | -3.504375000 | -1.763753000 |
| C  | 7.593821000  | -4.166814000 | -0.723071000 |
| C  | 6.320495000  | -3.610575000 | -0.804707000 |
| H  | -4.856666000 | -4.289679000 | -0.855210000 |



|    |              |              |              |
|----|--------------|--------------|--------------|
| H  | 4.948032000  | 3.784133000  | 1.515387000  |
| C  | -4.753791000 | -2.758031000 | -2.358932000 |
| C  | -5.399864000 | -3.781948000 | -1.654792000 |
| C  | 5.107989000  | 1.941835000  | 2.612807000  |
| C  | 5.556587000  | 3.206660000  | 2.214734000  |
| O  | -2.897622000 | -1.311645000 | -2.526081000 |
| O  | -0.591518000 | -0.533473000 | -4.043333000 |
| O  | 0.787406000  | 0.231013000  | -1.613472000 |
| O  | 3.461898000  | 0.258021000  | 2.504729000  |
| O  | 1.224542000  | -0.262640000 | 4.033650000  |
| O  | -0.429665000 | -1.500003000 | 2.181948000  |
| H  | -9.121678000 | 2.392723000  | -0.357875000 |
| C  | -7.393290000 | 1.775783000  | -1.497114000 |
| C  | -8.046102000 | 2.200647000  | -0.338875000 |
| H  | -4.602889000 | -4.392845000 | 1.947670000  |
| C  | -6.606516000 | -3.986538000 | 2.672818000  |
| C  | -5.294434000 | -3.651026000 | 2.352295000  |
| O  | -2.757071000 | -3.063190000 | -1.135370000 |
| H  | 3.647728000  | -0.069956000 | 0.033719000  |
| O  | -1.591980000 | -0.735255000 | -0.006269000 |
| O  | 2.692867000  | -0.193679000 | 0.029940000  |
| H  | 7.686245000  | 1.091913000  | 4.678601000  |
| H  | 7.100186000  | 4.702781000  | 2.398573000  |
| H  | 7.037489000  | 4.257325000  | -3.393654000 |
| H  | 7.567165000  | 0.323976000  | -5.074080000 |
| H  | 8.099830000  | -4.506360000 | -1.629693000 |
| H  | 8.071947000  | -3.954345000 | 2.644688000  |
| H  | -7.957395000 | 1.631555000  | -2.421571000 |
| H  | -7.839408000 | 2.711486000  | 1.750478000  |
| H  | -7.219263000 | -4.911264000 | -1.402326000 |
| H  | -7.274914000 | -1.903551000 | -4.490492000 |
| H  | -7.700287000 | -0.947102000 | 3.762754000  |
| H  | -6.960049000 | -5.009883000 | 2.525915000  |
| Hf | -1.297761000 | 0.096577000  | -1.908844000 |
| Hf | 1.817750000  | -1.106215000 | 1.901684000  |
| C  | 0.341693000  | 4.560780000  | 3.972480000  |
| C  | -1.187293000 | 4.352507000  | 3.734525000  |
| C  | -1.354762000 | 3.969681000  | 2.285945000  |
| C  | 1.159561000  | 3.291976000  | 4.193103000  |
| C  | -1.604367000 | 5.003485000  | 1.223988000  |
| C  | 2.633843000  | 3.664490000  | 4.320373000  |
| H  | -2.691340000 | 5.210016000  | 1.254404000  |
| H  | -1.661025000 | 5.338968000  | 3.886952000  |
| H  | 0.444700000  | 5.176192000  | 4.881856000  |
| H  | 4.222235000  | 2.719376000  | 4.940151000  |
| H  | -1.113075000 | 5.946588000  | 1.528482000  |

|   |              |             |              |
|---|--------------|-------------|--------------|
| H | -0.273295000 | 4.407381000 | -0.005050000 |
| H | 2.735264000  | 4.538314000 | 4.994253000  |
| H | 3.046855000  | 3.952494000 | 3.335795000  |
| H | -1.463160000 | 2.541309000 | 4.394332000  |
| H | 1.423812000  | 2.007213000 | 5.569557000  |
| H | 1.021268000  | 4.698606000 | 2.147449000  |
| H | 1.048203000  | 2.615767000 | 3.310568000  |
| O | 0.896250000  | 5.305519000 | 2.903701000  |
| O | -1.248849000 | 4.580680000 | -0.052277000 |
| O | 3.282358000  | 2.531345000 | 4.847686000  |
| O | -1.255152000 | 2.794003000 | 1.977168000  |
| O | -1.811220000 | 3.445444000 | 4.571483000  |
| O | 0.732214000  | 2.654390000 | 5.367470000  |

## Hf-MOF-808 TS3

|   |              |              |              |
|---|--------------|--------------|--------------|
| C | -3.448800000 | -1.965700000 | 2.156800000  |
| C | 3.881700000  | 1.003300000  | -2.299800000 |
| C | -3.841600000 | 1.392100000  | -0.254600000 |
| C | 4.304100000  | -2.576300000 | 0.267700000  |
| C | -3.369500000 | -2.356800000 | -1.985400000 |
| C | 3.808500000  | 1.407600000  | 2.107100000  |
| H | -1.209637000 | 2.581974000  | -0.237084000 |
| H | 2.396966000  | -1.445497000 | -4.237217000 |
| H | 0.903228000  | -4.260079000 | -1.464538000 |
| H | 1.545133000  | -3.989669000 | -2.889190000 |
| H | 0.262418000  | -0.959055000 | -4.042799000 |
| H | -1.953607000 | 2.466960000  | -2.988841000 |
| H | 0.105158000  | -4.929486000 | 1.391776000  |
| H | 5.191784000  | 0.459499000  | 4.212753000  |
| C | 6.572231000  | 2.086703000  | 4.604503000  |
| C | 5.542140000  | 1.450248000  | 3.917515000  |
| H | -5.373737000 | 2.291399000  | 1.771246000  |
| C | -7.300692000 | 2.510332000  | 0.799078000  |
| C | -5.945005000 | 2.198861000  | 0.844420000  |
| O | -3.036212000 | -0.810126000 | 2.450129000  |
| H | -5.359429000 | -0.269476000 | 2.971839000  |
| H | 5.609310000  | -0.452977000 | -3.768598000 |
| C | -4.867245000 | -2.297815000 | 2.460369000  |
| C | -5.747390000 | -1.284276000 | 2.861047000  |
| C | 5.131668000  | 1.480003000  | -2.956874000 |
| C | 5.925470000  | 0.589178000  | -3.690785000 |
| O | -2.744052000 | -2.857409000 | 1.591103000  |
| O | -0.195462000 | -4.171109000 | 1.913647000  |
| O | 1.068640000  | -2.174426000 | 0.222405000  |
| O | 3.260311000  | 1.824113000  | -1.560005000 |
| O | 0.860432000  | 3.088242000  | -1.980019000 |

|    |              |              |              |
|----|--------------|--------------|--------------|
| O  | -0.770661000 | 1.712629000  | -0.290157000 |
| Hf | -0.971689000 | -2.703936000 | 0.266548000  |
| Hf | 1.475553000  | 1.610131000  | -0.223535000 |
| H  | -8.319302000 | -3.873244000 | -3.428066000 |
| C  | -6.634061000 | -4.260060000 | -2.133526000 |
| C  | -7.308041000 | -3.572099000 | -3.143788000 |
| O  | 3.234225000  | 2.058859000  | 1.184869000  |
| O  | 1.207330000  | 3.684974000  | 0.688726000  |
| O  | -0.513836000 | -4.575817000 | -0.633203000 |
| H  | 8.401130000  | 2.715781000  | -4.658664000 |
| C  | 7.097322000  | 1.031929000  | -4.297558000 |
| C  | 7.482216000  | 2.368351000  | -4.180290000 |
| H  | 7.806629000  | 3.853716000  | 4.747914000  |
| C  | 6.387401000  | 3.989934000  | 3.124756000  |
| C  | 6.996321000  | 3.356279000  | 4.209280000  |
| H  | 9.321136000  | -4.496612000 | 0.536984000  |
| C  | 7.656576000  | -3.677610000 | 1.643242000  |
| C  | 8.301290000  | -4.108049000 | 0.482642000  |
| O  | -3.258859000 | 1.125027000  | -1.345425000 |
| H  | -4.912588000 | -1.264771000 | -3.908036000 |
| C  | -6.693486000 | -2.497555000 | -3.789156000 |
| C  | -5.408905000 | -2.107293000 | -3.422348000 |
| H  | -8.611931000 | -3.106379000 | 3.105725000  |
| C  | -7.089730000 | -1.574186000 | 3.087403000  |
| C  | -7.558123000 | -2.879151000 | 2.926714000  |
| H  | -5.471887000 | 1.269977000  | -2.394619000 |
| H  | 5.838236000  | -2.838446000 | 2.471745000  |
| C  | -5.285786000 | 1.755403000  | -0.309521000 |
| C  | -5.999817000 | 1.624704000  | -1.507022000 |
| C  | 5.692819000  | -3.114762000 | 0.343654000  |
| C  | 6.356660000  | -3.184542000 | 1.575283000  |
| O  | -3.291966000 | 1.368098000  | 0.882456000  |
| O  | 0.746711000  | 0.602857000  | 1.436296000  |
| O  | 3.797580000  | -2.446641000 | -0.884484000 |
| O  | 1.704466000  | -3.882417000 | -1.941796000 |
| O  | -0.343165000 | -2.010353000 | -1.878063000 |
| Hf | -1.363127000 | 0.559167000  | 1.696336000  |
| Hf | 1.899493000  | -1.567584000 | -1.631617000 |
| O  | 3.518896000  | -0.188726000 | -2.516821000 |
| O  | 1.689663000  | -1.837949000 | -3.712455000 |
| O  | -1.178247000 | 0.589061000  | 3.848373000  |
| H  | -0.646633000 | -2.565383000 | -2.605258000 |
| H  | 2.605215000  | -3.375877000 | 3.147630000  |
| H  | 0.417878000  | 0.088925000  | 4.069808000  |
| H  | 1.255497000  | -1.148088000 | 4.584145000  |
| H  | 0.587537000  | -3.806617000 | 2.422926000  |

|   |              |              |              |
|---|--------------|--------------|--------------|
| H | -1.182732000 | -4.944991000 | -1.219600000 |
| H | 4.895914000  | 3.500853000  | -2.265017000 |
| C | 6.694833000  | 3.261165000  | -3.451596000 |
| C | 5.525551000  | 2.819035000  | -2.839572000 |
| O | 3.731063000  | -2.283872000 | 1.354631000  |
| O | 1.789138000  | -2.862451000 | 3.151235000  |
| O | -1.221712000 | 1.848478000  | -3.095155000 |
| H | -0.704797000 | -1.964753000 | 3.002554000  |
| H | 2.033717000  | 4.173236000  | 0.568496000  |
| H | 0.131387000  | 2.631630000  | -2.512347000 |
| H | 0.429085000  | 3.889379000  | -1.657235000 |
| H | -1.771759000 | -0.027582000 | 4.293374000  |
| H | -0.507433000 | 0.379131000  | -4.453197000 |
| H | 5.815953000  | -3.483463000 | -1.770072000 |
| C | 7.644975000  | -4.041475000 | -0.747383000 |
| C | 6.346728000  | -3.544732000 | -0.818171000 |
| H | -4.802666000 | -4.395372000 | -0.978691000 |
| H | 4.870937000  | 3.834001000  | 1.585607000  |
| C | -4.726897000 | -2.796085000 | -2.411267000 |
| C | -5.346174000 | -3.876828000 | -1.770997000 |
| C | 4.926083000  | 2.081046000  | 2.829668000  |
| C | 5.355749000  | 3.355466000  | 2.438946000  |
| O | -2.911327000 | -1.291695000 | -2.499767000 |
| O | -0.618993000 | -0.485031000 | -4.029768000 |
| O | 0.799380000  | 0.235547000  | -1.617936000 |
| O | 3.497188000  | 0.239153000  | 2.473358000  |
| O | 1.318668000  | -0.354307000 | 4.035813000  |
| O | -0.397600000 | -1.542835000 | 2.192498000  |
| H | -9.074398000 | 2.612743000  | -0.429814000 |
| C | -7.357738000 | 1.928615000  | -1.548102000 |
| C | -8.008759000 | 2.373039000  | -0.396336000 |
| H | -4.644677000 | -4.380271000 | 1.975362000  |
| C | -6.683641000 | -3.894147000 | 2.533714000  |
| C | -5.343429000 | -3.604544000 | 2.295233000  |
| O | -2.763014000 | -3.054398000 | -1.124869000 |
| H | 3.654692000  | -0.083235000 | 0.019017000  |
| O | -1.565542000 | -0.723575000 | 0.023073000  |
| O | 2.704555000  | -0.238208000 | 0.007432000  |
| H | 7.048225000  | 1.591654000  | 5.454045000  |
| H | 6.722347000  | 4.981894000  | 2.812560000  |
| H | 6.996265000  | 4.307256000  | -3.361316000 |
| H | 7.715635000  | 0.332852000  | -4.865198000 |
| H | 8.150017000  | -4.379367000 | -1.655171000 |
| H | 8.172048000  | -3.726508000 | 2.605105000  |
| H | -7.913994000 | 1.816980000  | -2.481725000 |
| H | -7.810899000 | 2.860108000  | 1.699703000  |

|    |              |              |              |
|----|--------------|--------------|--------------|
| H  | -7.118331000 | -5.096311000 | -1.623716000 |
| H  | -7.222298000 | -1.960452000 | -4.580030000 |
| H  | -7.776487000 | -0.778767000 | 3.386336000  |
| H  | -7.052529000 | -4.915048000 | 2.409048000  |
| Hf | -1.311032000 | 0.112735000  | -1.870855000 |
| Hf | 1.840159000  | -1.161314000 | 1.898686000  |
| C  | 0.465201000  | 4.729722000  | 3.493345000  |
| C  | -1.981213000 | 3.983071000  | 3.843781000  |
| C  | -1.783573000 | 3.725887000  | 2.508622000  |
| C  | 0.460434000  | 5.112162000  | 4.934494000  |
| C  | -2.220142000 | 4.671522000  | 1.417395000  |
| C  | 1.888244000  | 5.323221000  | 5.422498000  |
| H  | -3.258875000 | 4.442302000  | 1.122508000  |
| H  | -2.385061000 | 4.934188000  | 4.199232000  |
| H  | 0.187249000  | 5.531383000  | 2.776474000  |
| H  | 2.637662000  | 6.065251000  | 7.057324000  |
| H  | -2.223821000 | 5.717360000  | 1.781348000  |
| H  | -0.512541000 | 4.413290000  | 0.508224000  |
| H  | 2.393701000  | 6.071478000  | 4.779536000  |
| H  | 2.447770000  | 4.373825000  | 5.339282000  |
| H  | -1.495003000 | 2.199614000  | 4.402985000  |
| H  | -0.095597000 | 6.601257000  | 5.983182000  |
| H  | 1.135007000  | 3.612836000  | 1.816760000  |
| H  | 0.032576000  | 4.267625000  | 5.515531000  |
| O  | 1.084565000  | 3.707583000  | 3.119751000  |
| O  | -1.443732000 | 4.523386000  | 0.242492000  |
| O  | 1.772512000  | 5.777621000  | 6.751024000  |
| O  | -1.217712000 | 2.623623000  | 2.121384000  |
| O  | -1.776782000 | 3.072074000  | 4.801252000  |
| O  | -0.291332000 | 6.287962000  | 5.089929000  |

## Hf-MOF-808 Int3

|   |              |              |              |
|---|--------------|--------------|--------------|
| C | -3.448800000 | -1.965700000 | 2.156800000  |
| C | 3.881700000  | 1.003300000  | -2.299800000 |
| C | -3.841600000 | 1.392100000  | -0.254600000 |
| C | 4.304100000  | -2.576300000 | 0.267700000  |
| C | -3.369500000 | -2.356800000 | -1.985400000 |
| C | 3.808500000  | 1.407600000  | 2.107100000  |
| H | -1.229285000 | 2.571378000  | -0.258482000 |
| H | 2.385224000  | -1.422755000 | -4.240158000 |
| H | 0.907324000  | -4.251106000 | -1.479018000 |
| H | 1.540561000  | -3.970643000 | -2.905402000 |
| H | 0.257714000  | -0.923847000 | -4.038113000 |
| H | -1.931242000 | 2.500264000  | -2.961710000 |
| H | 0.102369000  | -4.936471000 | 1.378086000  |
| H | 5.521351000  | 0.252705000  | 3.830941000  |

|    |              |              |              |
|----|--------------|--------------|--------------|
| C  | 6.785365000  | 1.926761000  | 4.384752000  |
| C  | 5.742336000  | 1.314148000  | 3.696554000  |
| H  | -5.376709000 | 2.267838000  | 1.780447000  |
| C  | -7.296799000 | 2.517030000  | 0.802605000  |
| C  | -5.943830000 | 2.194170000  | 0.849175000  |
| O  | -3.030685000 | -0.815260000 | 2.466336000  |
| H  | -5.352520000 | -0.269747000 | 2.993151000  |
| H  | 5.574707000  | -0.432365000 | -3.830836000 |
| C  | -4.870534000 | -2.292483000 | 2.449676000  |
| C  | -5.745911000 | -1.280211000 | 2.863847000  |
| C  | 5.122877000  | 1.485163000  | -2.968192000 |
| C  | 5.898078000  | 0.606116000  | -3.735540000 |
| O  | -2.747394000 | -2.854698000 | 1.584222000  |
| O  | -0.199136000 | -4.180245000 | 1.902693000  |
| O  | 1.068043000  | -2.176654000 | 0.218625000  |
| O  | 3.265394000  | 1.819922000  | -1.553079000 |
| O  | 0.874468000  | 3.131441000  | -1.875225000 |
| O  | -0.780230000 | 1.706418000  | -0.275441000 |
| Hf | -0.972166000 | -2.706440000 | 0.260063000  |
| Hf | 1.495066000  | 1.618604000  | -0.206935000 |
| H  | -8.316728000 | -3.874339000 | -3.434797000 |
| C  | -6.627733000 | -4.269345000 | -2.147660000 |
| C  | -7.306076000 | -3.572651000 | -3.148980000 |
| O  | 3.221949000  | 2.068427000  | 1.199272000  |
| O  | 0.934138000  | 3.500848000  | 0.947136000  |
| O  | -0.506918000 | -4.572585000 | -0.647924000 |
| H  | 8.367665000  | 2.740471000  | -4.701158000 |
| C  | 7.060854000  | 1.056024000  | -4.354232000 |
| C  | 7.455533000  | 2.387460000  | -4.213921000 |
| H  | 7.848353000  | 3.771807000  | 4.751321000  |
| C  | 6.242853000  | 4.034802000  | 3.330513000  |
| C  | 7.033661000  | 3.289220000  | 4.206046000  |
| H  | 9.315927000  | -4.512868000 | 0.526157000  |
| C  | 7.648819000  | -3.707961000 | 1.638941000  |
| C  | 8.297222000  | -4.121101000 | 0.474094000  |
| O  | -3.255057000 | 1.137887000  | -1.345984000 |
| H  | -4.920451000 | -1.248157000 | -3.891863000 |
| C  | -6.696715000 | -2.488655000 | -3.783392000 |
| C  | -5.412811000 | -2.097895000 | -3.414770000 |
| H  | -8.623345000 | -3.087298000 | 3.064182000  |
| C  | -7.091035000 | -1.565251000 | 3.079602000  |
| C  | -7.567276000 | -2.864030000 | 2.893834000  |
| H  | -5.463511000 | 1.311795000  | -2.402302000 |
| H  | 5.828699000  | -2.879109000 | 2.473577000  |
| C  | -5.282872000 | 1.764165000  | -0.309164000 |
| C  | -5.992474000 | 1.657348000  | -1.511713000 |

|    |              |              |              |
|----|--------------|--------------|--------------|
| C  | 5.691448000  | -3.119138000 | 0.340746000  |
| C  | 6.350550000  | -3.210327000 | 1.573533000  |
| O  | -3.296817000 | 1.348028000  | 0.885253000  |
| O  | 0.737164000  | 0.590477000  | 1.442355000  |
| O  | 3.795867000  | -2.444085000 | -0.882974000 |
| O  | 1.705813000  | -3.869678000 | -1.958320000 |
| O  | -0.342883000 | -1.997520000 | -1.881936000 |
| Hf | -1.371120000 | 0.550573000  | 1.701357000  |
| Hf | 1.899591000  | -1.558114000 | -1.632426000 |
| O  | 3.518748000  | -0.189796000 | -2.515619000 |
| O  | 1.676157000  | -1.811957000 | -3.715256000 |
| O  | -1.159927000 | 0.604951000  | 3.855690000  |
| H  | -0.645309000 | -2.548533000 | -2.612650000 |
| H  | 2.607093000  | -3.396145000 | 3.117836000  |
| H  | 0.377737000  | 0.032659000  | 4.053804000  |
| H  | 1.287925000  | -1.136510000 | 4.617454000  |
| H  | 0.583676000  | -3.817795000 | 2.413814000  |
| H  | -1.174641000 | -4.941574000 | -1.235807000 |
| H  | 4.911621000  | 3.490978000  | -2.225695000 |
| C  | 6.687148000  | 3.267982000  | -3.450813000 |
| C  | 5.526092000  | 2.819345000  | -2.827940000 |
| O  | 3.733875000  | -2.283737000 | 1.356517000  |
| O  | 1.793561000  | -2.879195000 | 3.140561000  |
| O  | -1.181978000 | 1.898801000  | -3.043469000 |
| H  | -0.708738000 | -1.984187000 | 3.000009000  |
| H  | 1.530547000  | 3.644094000  | 1.711342000  |
| H  | 0.124997000  | 2.705271000  | -2.411874000 |
| H  | 0.500533000  | 3.955676000  | -1.540452000 |
| H  | -1.777187000 | 0.028814000  | 4.322241000  |
| H  | -0.485124000 | 0.438553000  | -4.417414000 |
| H  | 5.821629000  | -3.456504000 | -1.777750000 |
| C  | 7.645643000  | -4.033674000 | -0.757060000 |
| C  | 6.348647000  | -3.533207000 | -0.824959000 |
| H  | -4.793770000 | -4.410766000 | -0.997729000 |
| H  | 4.575004000  | 3.986677000  | 1.945391000  |
| C  | -4.726288000 | -2.795610000 | -2.412887000 |
| C  | -5.340557000 | -3.885511000 | -1.783334000 |
| C  | 4.947573000  | 2.057268000  | 2.814031000  |
| C  | 5.207395000  | 3.420246000  | 2.631597000  |
| O  | -2.913085000 | -1.286085000 | -2.490706000 |
| O  | -0.617529000 | -0.436739000 | -4.022566000 |
| O  | 0.802549000  | 0.246477000  | -1.599586000 |
| O  | 3.489368000  | 0.240546000  | 2.477219000  |
| O  | 1.301121000  | -0.370060000 | 4.028607000  |
| O  | -0.401089000 | -1.555513000 | 2.193525000  |
| H  | -9.063799000 | 2.652682000  | -0.432459000 |

|    |              |              |              |
|----|--------------|--------------|--------------|
| C  | -7.347720000 | 1.972290000  | -1.553778000 |
| C  | -8.000276000 | 2.404002000  | -0.397974000 |
| H  | -4.659430000 | -4.367294000 | 1.928969000  |
| C  | -6.697808000 | -3.877724000 | 2.486633000  |
| C  | -5.354661000 | -3.592921000 | 2.259527000  |
| O  | -2.759966000 | -3.060027000 | -1.131004000 |
| H  | 3.661422000  | -0.094746000 | 0.026485000  |
| O  | -1.569140000 | -0.726711000 | 0.024358000  |
| O  | 2.709445000  | -0.238427000 | 0.016256000  |
| H  | 7.409912000  | 1.342774000  | 5.065066000  |
| H  | 6.436086000  | 5.101096000  | 3.193315000  |
| H  | 6.996884000  | 4.309777000  | -3.341532000 |
| H  | 7.664399000  | 0.366703000  | -4.949069000 |
| H  | 8.153371000  | -4.358220000 | -1.668164000 |
| H  | 8.160166000  | -3.774694000 | 2.601960000  |
| H  | -7.900807000 | 1.879593000  | -2.491295000 |
| H  | -7.808307000 | 2.856599000  | 1.706327000  |
| H  | -7.108038000 | -5.113022000 | -1.646389000 |
| H  | -7.229067000 | -1.944651000 | -4.567113000 |
| H  | -7.773928000 | -0.770771000 | 3.389642000  |
| H  | -7.072958000 | -4.893652000 | 2.341784000  |
| Hf | -1.306376000 | 0.125753000  | -1.860865000 |
| Hf | 1.834595000  | -1.170427000 | 1.897759000  |
| C  | 1.355896000  | 3.596390000  | 4.651079000  |
| C  | -2.042777000 | 3.977319000  | 3.811638000  |
| C  | -1.928206000 | 3.688001000  | 2.497909000  |
| C  | 1.494033000  | 2.586543000  | 5.752711000  |
| C  | -2.585773000 | 4.444567000  | 1.387388000  |
| C  | 2.842145000  | 1.897006000  | 5.725625000  |
| H  | -3.484159000 | 3.922701000  | 1.020376000  |
| H  | -2.571694000 | 4.862740000  | 4.174295000  |
| H  | 0.814132000  | 4.530335000  | 4.935283000  |
| H  | 3.722385000  | 0.632563000  | 6.908847000  |
| H  | -2.916241000 | 5.441927000  | 1.730368000  |
| H  | -0.883824000 | 4.874768000  | 0.540264000  |
| H  | 3.641346000  | 2.654700000  | 5.850900000  |
| H  | 2.982873000  | 1.399119000  | 4.752925000  |
| H  | -1.329225000 | 2.303365000  | 4.405323000  |
| H  | 1.463518000  | 2.569922000  | 7.655662000  |
| H  | 0.077558000  | 3.185999000  | 1.421932000  |
| H  | 0.719031000  | 1.816657000  | 5.537898000  |
| O  | 1.810192000  | 3.421751000  | 3.540254000  |
| O  | -1.738378000 | 4.535652000  | 0.237635000  |
| O  | 2.831189000  | 0.978968000  | 6.801069000  |
| O  | -1.172181000 | 2.639737000  | 2.111252000  |
| O  | -1.514600000 | 3.201596000  | 4.783628000  |



O 1.257076000 3.225119000 6.976874000

Hf-MOF-808 TS4

C -3.448800000 -1.965700000 2.156800000  
C 3.881700000 1.003300000 -2.299800000  
C -3.841600000 1.392100000 -0.254600000  
C 4.304100000 -2.576300000 0.267700000  
C -3.369500000 -2.356800000 -1.985400000  
C 3.808500000 1.407600000 2.107100000  
H -1.256448000 2.628094000 -0.259698000  
H 2.370950000 -1.402368000 -4.223476000  
H 0.917346000 -4.239639000 -1.482650000  
H 1.551326000 -3.937891000 -2.902023000  
H 0.254196000 -0.928589000 -4.027845000  
H -2.018461000 2.461577000 -2.943972000  
H 0.074115000 -4.950642000 1.377580000  
H 4.978221000 0.767572000 4.449678000  
C 6.677275000 2.118262000 4.468903000  
C 5.531572000 1.546645000 3.921147000  
H -5.427073000 2.221355000 1.765293000  
C -7.282480000 2.635771000 0.724564000  
C -5.952420000 2.234570000 0.807502000  
O -3.014850000 -0.824824000 2.493074000  
H -5.330849000 -0.258542000 3.020245000  
H 5.549975000 -0.431155000 -3.862620000  
C -4.880241000 -2.271220000 2.418589000  
C -5.742558000 -1.255551000 2.850914000  
C 5.114184000 1.483012000 -2.983988000  
C 5.876461000 0.606353000 -3.766532000  
O -2.752025000 -2.851492000 1.578531000  
O -0.213627000 -4.181915000 1.891159000  
O 1.062187000 -2.158881000 0.227239000  
O 3.290805000 1.815434000 -1.528965000  
O 0.887113000 3.016650000 -2.023800000  
O -0.791188000 1.779650000 -0.164876000  
Hf -0.965961000 -2.716403000 0.262524000  
Hf 1.495662000 1.681550000 -0.192725000  
H -8.251567000 -3.966758000 -3.552556000  
C -6.582786000 -4.335778000 -2.231723000  
C -7.255189000 -3.644228000 -3.240605000  
O 3.218433000 2.082619000 1.217568000  
O 1.269504000 3.734188000 0.521573000  
O -0.511078000 -4.573148000 -0.657893000  
H 8.338027000 2.740746000 -4.751974000  
C 7.032188000 1.057230000 -4.397799000  
C 7.431566000 2.386985000 -4.254706000

|    |              |              |              |
|----|--------------|--------------|--------------|
| H  | 8.269086000  | 3.552748000  | 4.197842000  |
| C  | 6.909403000  | 3.531367000  | 2.518813000  |
| C  | 7.367204000  | 3.109468000  | 3.768855000  |
| H  | 9.233318000  | -4.710455000 | 0.514922000  |
| C  | 7.615608000  | -3.809516000 | 1.626856000  |
| C  | 8.230917000  | -4.278333000 | 0.465169000  |
| O  | -3.235365000 | 1.147655000  | -1.334418000 |
| H  | -4.909195000 | -1.256805000 | -3.906067000 |
| C  | -6.657989000 | -2.539101000 | -3.849492000 |
| C  | -5.391841000 | -2.122687000 | -3.448698000 |
| H  | -8.659554000 | -3.007200000 | 2.935158000  |
| C  | -7.096896000 | -1.519440000 | 3.032669000  |
| C  | -7.595983000 | -2.800742000 | 2.792790000  |
| H  | -5.371594000 | 1.526984000  | -2.469080000 |
| H  | 5.843326000  | -2.883987000 | 2.462455000  |
| C  | -5.262389000 | 1.837109000  | -0.345151000 |
| C  | -5.921303000 | 1.844524000  | -1.580854000 |
| C  | 5.668018000  | -3.172664000 | 0.337774000  |
| C  | 6.337969000  | -3.260633000 | 1.564948000  |
| O  | -3.336737000 | 1.296834000  | 0.897470000  |
| O  | 0.724980000  | 0.633600000  | 1.474268000  |
| O  | 3.792956000  | -2.425764000 | -0.879489000 |
| O  | 1.713724000  | -3.848510000 | -1.953125000 |
| O  | -0.349118000 | -1.994930000 | -1.871100000 |
| Hf | -1.368691000 | 0.514134000  | 1.716093000  |
| Hf | 1.892599000  | -1.528792000 | -1.616607000 |
| O  | 3.501510000  | -0.184501000 | -2.519710000 |
| O  | 1.659768000  | -1.792803000 | -3.702140000 |
| O  | -0.889145000 | 0.592542000  | 3.823958000  |
| H  | -0.641353000 | -2.544622000 | -2.606909000 |
| H  | 2.611847000  | -3.450189000 | 3.008306000  |
| H  | 0.488248000  | -0.104255000 | 4.173214000  |
| H  | 1.317690000  | -1.413913000 | 4.538281000  |
| H  | 0.582660000  | -3.820398000 | 2.393210000  |
| H  | -1.174777000 | -4.930374000 | -1.257505000 |
| H  | 4.915308000  | 3.486241000  | -2.227520000 |
| C  | 6.675341000  | 3.265008000  | -3.476470000 |
| C  | 5.521486000  | 2.815994000  | -2.840598000 |
| O  | 3.748956000  | -2.254011000 | 1.357741000  |
| O  | 1.797676000  | -2.937334000 | 3.070077000  |
| O  | -1.264259000 | 1.869956000  | -3.045427000 |
| H  | -0.735119000 | -1.906358000 | 3.024750000  |
| H  | 2.123439000  | 4.207274000  | 0.592976000  |
| H  | 0.087955000  | 2.650274000  | -2.513811000 |
| H  | 0.627416000  | 3.879244000  | -1.675172000 |
| H  | -1.589795000 | 0.774414000  | 4.457686000  |

|    |              |              |              |
|----|--------------|--------------|--------------|
| H  | -0.526926000 | 0.406416000  | -4.440049000 |
| H  | 5.756601000  | -3.565179000 | -1.773396000 |
| C  | 7.567899000  | -4.194273000 | -0.760194000 |
| C  | 6.292288000  | -3.641337000 | -0.825392000 |
| H  | -4.771692000 | -4.447597000 | -1.043287000 |
| H  | 5.370744000  | 3.303315000  | 1.007366000  |
| C  | -4.710780000 | -2.815912000 | -2.440012000 |
| C  | -5.313369000 | -3.926073000 | -1.834882000 |
| C  | 5.056213000  | 1.984610000  | 2.680192000  |
| C  | 5.751759000  | 2.978047000  | 1.978390000  |
| O  | -2.919877000 | -1.277331000 | -2.477426000 |
| O  | -0.630218000 | -0.453719000 | -4.007352000 |
| O  | 0.775947000  | 0.263806000  | -1.568464000 |
| O  | 3.437475000  | 0.277725000  | 2.534092000  |
| O  | 1.390399000  | -0.550380000 | 4.106742000  |
| O  | -0.398434000 | -1.548085000 | 2.194994000  |
| H  | -8.980141000 | 2.948536000  | -0.573935000 |
| C  | -7.253465000 | 2.240006000  | -1.661007000 |
| C  | -7.934798000 | 2.636987000  | -0.509490000 |
| H  | -4.701154000 | -4.330493000 | 1.830199000  |
| C  | -6.739893000 | -3.817815000 | 2.366317000  |
| C  | -5.387028000 | -3.553953000 | 2.174807000  |
| O  | -2.762667000 | -3.056473000 | -1.126203000 |
| H  | 3.651342000  | -0.077693000 | 0.037262000  |
| O  | -1.564672000 | -0.721541000 | 0.041275000  |
| O  | 2.697503000  | -0.210176000 | 0.037932000  |
| H  | 7.036941000  | 1.789581000  | 5.446565000  |
| H  | 7.458273000  | 4.297209000  | 1.965117000  |
| H  | 6.988100000  | 4.305800000  | -3.366100000 |
| H  | 7.626580000  | 0.370036000  | -5.004225000 |
| H  | 8.050108000  | -4.562016000 | -1.668786000 |
| H  | 8.136675000  | -3.871605000 | 2.584886000  |
| H  | -7.765808000 | 2.238784000  | -2.625781000 |
| H  | -7.816095000 | 2.948055000  | 1.625311000  |
| H  | -7.053678000 | -5.196568000 | -1.751018000 |
| H  | -7.185796000 | -1.998820000 | -4.638763000 |
| H  | -7.769760000 | -0.722122000 | 3.357186000  |
| H  | -7.133126000 | -4.819568000 | 2.177671000  |
| Hf | -1.303626000 | 0.121260000  | -1.850164000 |
| Hf | 1.840943000  | -1.155528000 | 1.910123000  |
| C  | 3.985414000  | 5.994810000  | 1.642316000  |
| C  | 0.131282000  | 3.960666000  | 2.916557000  |
| C  | -1.127218000 | 3.768799000  | 2.330800000  |
| C  | 3.131702000  | 6.020790000  | 2.874470000  |
| C  | -1.759097000 | 4.825951000  | 1.457224000  |
| C  | 3.259785000  | 4.696833000  | 3.633280000  |

|   |              |             |             |
|---|--------------|-------------|-------------|
| H | -2.442840000 | 5.440518000 | 2.077229000 |
| H | 0.412405000  | 4.988563000 | 3.183773000 |
| H | 4.927126000  | 6.600125000 | 1.699730000 |
| H | 1.836340000  | 4.077578000 | 4.777880000 |
| H | -1.000778000 | 5.510311000 | 1.050851000 |
| H | -2.913563000 | 3.465636000 | 0.785408000 |
| H | 4.326181000  | 4.539751000 | 3.880851000 |
| H | 2.940728000  | 3.865494000 | 2.983377000 |
| H | 0.096097000  | 2.198774000 | 3.791307000 |
| H | 3.131960000  | 6.891712000 | 4.562514000 |
| H | 0.721193000  | 3.846111000 | 1.699318000 |
| H | 2.079459000  | 6.114980000 | 2.524409000 |
| O | 3.707500000  | 5.346817000 | 0.657613000 |
| O | -2.438541000 | 4.217928000 | 0.387807000 |
| O | 2.505134000  | 4.785061000 | 4.810235000 |
| O | -1.710009000 | 2.645590000 | 2.335673000 |
| O | 0.628780000  | 3.032614000 | 3.813460000 |
| O | 3.502779000  | 7.092134000 | 3.690854000 |

## Hf-MOF-808 Prod

|   |              |              |              |
|---|--------------|--------------|--------------|
| C | -3.448800000 | -1.965700000 | 2.156800000  |
| C | 3.881700000  | 1.003300000  | -2.299800000 |
| C | -3.841600000 | 1.392100000  | -0.254600000 |
| C | 4.304100000  | -2.576300000 | 0.267700000  |
| C | -3.369500000 | -2.356800000 | -1.985400000 |
| C | 3.808500000  | 1.407600000  | 2.107100000  |
| H | -1.204040000 | 2.593645000  | -0.369606000 |
| H | 2.407019000  | -1.457607000 | -4.230301000 |
| H | 0.939993000  | -4.259129000 | -1.449815000 |
| H | 1.576069000  | -3.974104000 | -2.868643000 |
| H | 0.286982000  | -0.980091000 | -4.056213000 |
| H | -2.059020000 | 2.419568000  | -3.030311000 |
| H | 0.135151000  | -4.903661000 | 1.436861000  |
| H | 5.223497000  | 0.481578000  | 4.209825000  |
| C | 6.839694000  | 1.921955000  | 4.316144000  |
| C | 5.677280000  | 1.377125000  | 3.780914000  |
| H | -5.426244000 | 1.842442000  | 1.876763000  |
| C | -7.354033000 | 2.150769000  | 0.931490000  |
| C | -5.984203000 | 1.902346000  | 0.939002000  |
| O | -3.053698000 | -0.792632000 | 2.406029000  |
| H | -5.252194000 | -0.385211000 | 3.374866000  |
| H | 5.549464000  | -0.461889000 | -3.834532000 |
| C | -4.830126000 | -2.334299000 | 2.568393000  |
| C | -5.654434000 | -1.382757000 | 3.183625000  |
| C | 5.125361000  | 1.465406000  | -2.980186000 |
| C | 5.885314000  | 0.573391000  | -3.747489000 |

|    |              |              |              |
|----|--------------|--------------|--------------|
| O  | -2.750797000 | -2.847034000 | 1.568011000  |
| O  | -0.177538000 | -4.133062000 | 1.933284000  |
| O  | 1.060178000  | -2.153846000 | 0.226361000  |
| O  | 3.297258000  | 1.827457000  | -1.540043000 |
| O  | 0.878354000  | 2.963091000  | -2.147605000 |
| O  | -0.801037000 | 1.707869000  | -0.313328000 |
| Hf | -0.968904000 | -2.718515000 | 0.245864000  |
| Hf | 1.483152000  | 1.718524000  | -0.239973000 |
| H  | -8.391665000 | -3.754917000 | -3.291242000 |
| C  | -6.660802000 | -4.219372000 | -2.085631000 |
| C  | -7.366627000 | -3.477115000 | -3.033882000 |
| O  | 3.201881000  | 2.085347000  | 1.235324000  |
| O  | 1.178841000  | 3.675791000  | 0.408276000  |
| O  | -0.507109000 | -4.595161000 | -0.607935000 |
| H  | 8.374512000  | 2.672734000  | -4.739597000 |
| C  | 7.049878000  | 1.005884000  | -4.375454000 |
| C  | 7.461186000  | 2.333229000  | -4.244992000 |
| H  | 8.312334000  | 3.496123000  | 4.171795000  |
| C  | 6.790574000  | 3.674746000  | 2.650403000  |
| C  | 7.398289000  | 3.070268000  | 3.751010000  |
| H  | 9.235830000  | -4.696711000 | 0.580984000  |
| C  | 7.600114000  | -3.802050000 | 1.671528000  |
| C  | 8.232957000  | -4.267428000 | 0.517879000  |
| O  | -3.281869000 | 1.105765000  | -1.343942000 |
| H  | -4.975871000 | -1.160164000 | -3.784653000 |
| C  | -6.766478000 | -2.378187000 | -3.651015000 |
| C  | -5.462793000 | -2.020146000 | -3.320534000 |
| H  | -8.475841000 | -3.252431000 | 3.547000000  |
| C  | -6.960286000 | -1.713503000 | 3.533426000  |
| C  | -7.449693000 | -2.994777000 | 3.273607000  |
| H  | -5.457316000 | 1.564595000  | -2.406697000 |
| H  | 5.813097000  | -2.882916000 | 2.483184000  |
| C  | -5.300063000 | 1.698200000  | -0.267249000 |
| C  | -6.003266000 | 1.740726000  | -1.477661000 |
| C  | 5.668565000  | -3.169052000 | 0.356361000  |
| C  | 6.321776000  | -3.257022000 | 1.592422000  |
| O  | -3.260632000 | 1.434126000  | 0.874106000  |
| O  | 0.710578000  | 0.652358000  | 1.434318000  |
| O  | 3.811980000  | -2.415168000 | -0.886357000 |
| O  | 1.734251000  | -3.872283000 | -1.920208000 |
| O  | -0.336327000 | -2.027317000 | -1.883174000 |
| Hf | -1.367521000 | 0.527489000  | 1.611687000  |
| Hf | 1.900501000  | -1.532147000 | -1.627669000 |
| O  | 3.497671000  | -0.182341000 | -2.521866000 |
| O  | 1.694838000  | -1.844007000 | -3.707391000 |
| O  | -1.231127000 | 0.685129000  | 3.751032000  |

|   |              |              |              |
|---|--------------|--------------|--------------|
| H | -0.632230000 | -2.579797000 | -2.615514000 |
| H | 2.598402000  | -3.263242000 | 3.214810000  |
| H | 0.285735000  | 0.141530000  | 4.032020000  |
| H | 1.234000000  | -1.004000000 | 4.605965000  |
| H | 0.593136000  | -3.750933000 | 2.445018000  |
| H | -1.158459000 | -4.979753000 | -1.204059000 |
| H | 4.940822000  | 3.477826000  | -2.249064000 |
| C | 6.707578000  | 3.227022000  | -3.482468000 |
| C | 5.545202000  | 2.795525000  | -2.849934000 |
| O | 3.725488000  | -2.265649000 | 1.350346000  |
| O | 1.777590000  | -2.757148000 | 3.194063000  |
| O | -1.322590000 | 1.809577000  | -3.148063000 |
| H | -0.735050000 | -1.928243000 | 2.989245000  |
| H | 1.811898000  | 4.011379000  | 1.066951000  |
| H | 0.067373000  | 2.614399000  | -2.619064000 |
| H | 0.683878000  | 3.869905000  | -1.878845000 |
| H | -1.852958000 | 0.094786000  | 4.194205000  |
| H | -0.513677000 | 0.330335000  | -4.512482000 |
| H | 5.788028000  | -3.557287000 | -1.753798000 |
| C | 7.586754000  | -4.183389000 | -0.716403000 |
| C | 6.310648000  | -3.633803000 | -0.798553000 |
| H | -4.788072000 | -4.425633000 | -1.010745000 |
| H | 5.132045000  | 3.595023000  | 1.255140000  |
| C | -4.748914000 | -2.763081000 | -2.371578000 |
| C | -5.355770000 | -3.865250000 | -1.756250000 |
| C | 5.059235000  | 1.982023000  | 2.679356000  |
| C | 5.623022000  | 3.134919000  | 2.116304000  |
| O | -2.901184000 | -1.303324000 | -2.511241000 |
| O | -0.601351000 | -0.513598000 | -4.046457000 |
| O | 0.783815000  | 0.239627000  | -1.620071000 |
| O | 3.445726000  | 0.264496000  | 2.525261000  |
| O | 1.231718000  | -0.219720000 | 4.038792000  |
| O | -0.421816000 | -1.508807000 | 2.180033000  |
| H | -9.123690000 | 2.391832000  | -0.283268000 |
| C | -7.371965000 | 1.993141000  | -1.482448000 |
| C | -8.048174000 | 2.198804000  | -0.278577000 |
| H | -4.666623000 | -4.346874000 | 1.834118000  |
| C | -6.630734000 | -3.947619000 | 2.665194000  |
| C | -5.324765000 | -3.619550000 | 2.313476000  |
| O | -2.754847000 | -3.071442000 | -1.142685000 |
| H | 3.647699000  | -0.068390000 | 0.023817000  |
| O | -1.593054000 | -0.741040000 | -0.005731000 |
| O | 2.693415000  | -0.196071000 | 0.021280000  |
| H | 7.314756000  | 1.452197000  | 5.180328000  |
| H | 7.229043000  | 4.570987000  | 2.206130000  |
| H | 7.029593000  | 4.266021000  | -3.381829000 |

|    |              |              |              |
|----|--------------|--------------|--------------|
| H  | 7.641894000  | 0.305990000  | -4.969612000 |
| H  | 8.082638000  | -4.548332000 | -1.618750000 |
| H  | 8.108162000  | -3.864090000 | 2.636578000  |
| H  | -7.918022000 | 2.024771000  | -2.428111000 |
| H  | -7.886263000 | 2.300997000  | 1.873823000  |
| H  | -7.133776000 | -5.075784000 | -1.599314000 |
| H  | -7.321136000 | -1.797236000 | -4.391606000 |
| H  | -7.602410000 | -0.969208000 | 4.010212000  |
| H  | -7.015230000 | -4.950302000 | 2.464085000  |
| Hf | -1.291441000 | 0.106100000  | -1.907071000 |
| Hf | 1.822074000  | -1.110124000 | 1.878535000  |
| C  | 0.502656000  | 5.322866000  | 3.194164000  |
| C  | -3.235710000 | 3.752093000  | 3.144481000  |
| C  | -2.195816000 | 3.720920000  | 2.076320000  |
| C  | 1.655330000  | 4.503585000  | 3.701083000  |
| C  | -2.163268000 | 4.782364000  | 1.010677000  |
| C  | 1.260843000  | 3.055871000  | 3.939339000  |
| H  | -3.185514000 | 4.881584000  | 0.604176000  |
| H  | -4.220569000 | 3.874889000  | 2.655265000  |
| H  | 0.734507000  | 5.914846000  | 2.266462000  |
| H  | 2.243003000  | 1.440089000  | 4.340527000  |
| H  | -1.952904000 | 5.750491000  | 1.511193000  |
| H  | -0.367424000 | 4.303019000  | 0.305639000  |
| H  | 0.908170000  | 2.614221000  | 2.988400000  |
| H  | 0.416075000  | 3.026839000  | 4.653345000  |
| H  | -2.379706000 | 2.183967000  | 3.938853000  |
| H  | 3.338461000  | 3.917051000  | 2.975374000  |
| H  | -3.065866000 | 4.703759000  | 3.694086000  |
| H  | 1.952789000  | 4.939001000  | 4.680780000  |
| O  | -0.584636000 | 5.362244000  | 3.717869000  |
| O  | -1.295817000 | 4.487666000  | -0.029068000 |
| O  | 2.406237000  | 2.397023000  | 4.413701000  |
| O  | -1.350368000 | 2.831833000  | 2.058185000  |
| O  | -3.248440000 | 2.643798000  | 3.964937000  |
| O  | 2.702159000  | 4.619723000  | 2.768977000  |

## 6. Hf-UIO-66 case

### Hf-UIO-66

|   |              |              |              |
|---|--------------|--------------|--------------|
| C | 10.500304000 | 13.573387000 | 3.164252000  |
| C | 13.590710000 | 10.499150000 | 3.218816000  |
| C | 7.259476000  | 10.315372000 | 3.225519000  |
| C | 13.586689000 | 13.569289000 | 0.091792000  |
| C | 7.226103000  | 7.224727000  | 0.091424000  |
| C | 10.347298000 | 13.576508000 | -3.149301000 |
| C | 10.494316000 | 7.256216000  | -3.139784000 |

|   |              |              |              |
|---|--------------|--------------|--------------|
| C | 13.586899000 | 10.339498000 | -3.142396000 |
| C | 7.268501000  | 10.493894000 | -3.141496000 |
| C | 7.267313000  | 13.569007000 | -0.062020000 |
| C | 13.640791000 | 7.253253000  | -0.115407000 |
| H | 6.480796000  | 14.352396000 | -0.118725000 |
| H | 14.373555000 | 14.352482000 | 0.146590000  |
| H | 10.551911000 | 14.360928000 | 3.946796000  |
| H | 10.294903000 | 14.355689000 | -3.939692000 |
| H | 10.550598000 | 6.488156000  | -3.941806000 |
| H | 14.370154000 | 10.294241000 | -3.929266000 |
| H | 6.486963000  | 10.556791000 | -3.929142000 |
| C | 6.623882000  | 10.218865000 | 5.647670000  |
| C | 14.267354000 | 10.666816000 | 5.625413000  |
| C | 5.658873000  | 10.169368000 | 6.649006000  |
| C | 15.247364000 | 10.772038000 | 6.607668000  |
| C | 5.468677000  | 3.874086000  | 0.169697000  |
| C | 6.473141000  | 4.835501000  | 0.111947000  |
| C | 16.962368000 | 10.768287000 | 4.901400000  |
| C | 3.913727000  | 10.204159000 | 4.973700000  |
| C | 4.804616000  | 6.584912000  | 0.250388000  |
| C | 15.985060000 | 10.663927000 | 3.916616000  |
| C | 4.875769000  | 10.255272000 | 3.970092000  |
| C | 3.802105000  | 5.621224000  | 0.309255000  |
| C | 6.237721000  | 10.262146000 | 4.301351000  |
| C | 14.630782000 | 10.610405000 | 4.273292000  |
| C | 4.304065000  | 10.161362000 | 6.313219000  |
| C | 16.594833000 | 10.822039000 | 6.246946000  |
| C | 4.132707000  | 4.265746000  | 0.269280000  |
| C | 6.147604000  | 6.197841000  | 0.152289000  |
| H | 7.687723000  | 10.226448000 | 5.891025000  |
| H | 13.208682000 | 10.630191000 | 5.887945000  |
| H | 5.962491000  | 10.136249000 | 7.697615000  |
| H | 14.961281000 | 10.816447000 | 7.660821000  |
| H | 5.726668000  | 2.813236000  | 0.136402000  |
| H | 7.523154000  | 4.547971000  | 0.030294000  |
| H | 18.017067000 | 10.808463000 | 4.620570000  |
| H | 2.853227000  | 10.197173000 | 4.712683000  |
| H | 4.565736000  | 7.649628000  | 0.279075000  |
| H | 16.251660000 | 10.622290000 | 2.859019000  |
| H | 4.591473000  | 10.289070000 | 2.916802000  |
| H | 2.756193000  | 5.926610000  | 0.386439000  |
| H | 8.438465000  | 12.380029000 | 2.001122000  |
| O | 8.492885000  | 10.271347000 | 3.573462000  |
| O | 12.370785000 | 10.419450000 | 3.598691000  |
| O | 10.465303000 | 12.389045000 | 3.581853000  |
| O | 10.478400000 | 13.977883000 | 1.978332000  |



|    |              |              |              |
|----|--------------|--------------|--------------|
| O  | 8.414076000  | 6.816277000  | 0.033577000  |
| O  | 12.400890000 | 13.985177000 | 0.058746000  |
| O  | 6.862165000  | 8.442345000  | 0.096995000  |
| O  | 13.990886000 | 12.381365000 | 0.065712000  |
| O  | 13.963489000 | 10.484845000 | 2.015426000  |
| O  | 6.862042000  | 10.400438000 | 2.030867000  |
| O  | 9.005479000  | 11.843558000 | 1.436486000  |
| O  | 11.779140000 | 8.930562000  | 1.530599000  |
| O  | 9.372227000  | 9.355676000  | 1.090981000  |
| O  | 11.474702000 | 11.473307000 | 1.063050000  |
| Hf | 10.422157000 | 12.948090000 | -0.010359000 |
| Hf | 10.417341000 | 7.804110000  | 0.060490000  |
| Hf | 10.438268000 | 10.465396000 | 2.469064000  |
| Hf | 12.954427000 | 10.373936000 | 0.024076000  |
| Hf | 7.906731000  | 10.386329000 | 0.031724000  |
| H  | 15.098819000 | 2.847779000  | -0.464678000 |
| H  | 13.314761000 | 4.596913000  | -0.297036000 |
| H  | 16.313219000 | 7.662996000  | -0.148074000 |
| H  | 18.108879000 | 5.929850000  | -0.318433000 |
| H  | 8.444033000  | 8.438408000  | -1.938215000 |
| H  | 12.403534000 | 12.382244000 | -1.957930000 |
| C  | 15.368257000 | 3.904182000  | -0.396673000 |
| C  | 14.371449000 | 4.870751000  | -0.304477000 |
| C  | 16.062791000 | 6.602839000  | -0.217736000 |
| C  | 17.057418000 | 5.633663000  | -0.313079000 |
| C  | 16.711377000 | 4.284350000  | -0.401883000 |
| C  | 14.713551000 | 6.226355000  | -0.214052000 |
| O  | 8.457066000  | 10.460112000 | -3.542059000 |
| O  | 12.399616000 | 10.369175000 | -3.544831000 |
| O  | 10.485978000 | 8.450683000  | -3.532710000 |
| O  | 10.375648000 | 12.386778000 | -3.540750000 |
| O  | 10.377431000 | 13.999078000 | -1.963913000 |
| O  | 10.438442000 | 6.824520000  | -1.966249000 |
| O  | 8.452824000  | 13.986341000 | -0.039622000 |
| O  | 12.450862000 | 6.873358000  | -0.182600000 |
| O  | 14.011424000 | 8.466979000  | 0.034764000  |
| O  | 6.861894000  | 12.382750000 | -0.021285000 |
| O  | 14.000976000 | 10.360699000 | -1.954966000 |
| O  | 6.854505000  | 10.458759000 | -1.954527000 |
| O  | 11.846259000 | 11.834065000 | -1.395269000 |
| O  | 9.005186000  | 8.988472000  | -1.381125000 |
| O  | 11.475887000 | 9.376485000  | -0.984508000 |
| O  | 9.377261000  | 11.458176000 | -1.011219000 |
| H  | 12.296675000 | 8.319867000  | 2.071386000  |
| Hf | 10.432865000 | 10.393666000 | -2.468836000 |
| O  | 10.499637000 | 6.592059000  | 1.698193000  |

|   |              |              |              |
|---|--------------|--------------|--------------|
| H | 9.758480000  | 6.024547000  | 1.926689000  |
| H | 17.363329000 | 10.904111000 | 7.019301000  |
| H | 17.493304000 | 3.524520000  | -0.475271000 |
| H | 3.344591000  | 3.510278000  | 0.315007000  |
| H | 3.547566000  | 10.121604000 | 7.100590000  |

## Hf-UIO-66 Ads

|   |              |              |              |
|---|--------------|--------------|--------------|
| C | 10.500300000 | 13.573400000 | 3.164300000  |
| C | 13.590800000 | 10.499200000 | 3.218800000  |
| C | 7.259400000  | 10.315400000 | 3.225500000  |
| C | 13.586700000 | 13.569300000 | 0.091800000  |
| C | 7.226100000  | 7.224700000  | 0.091400000  |
| C | 10.347300000 | 13.576500000 | -3.149300000 |
| C | 10.494300000 | 7.256200000  | -3.139800000 |
| C | 13.586900000 | 10.339500000 | -3.142400000 |
| C | 7.268500000  | 10.493900000 | -3.141500000 |
| C | 7.267300000  | 13.569000000 | -0.062000000 |
| C | 13.640800000 | 7.253200000  | -0.115400000 |
| H | 6.481009000  | 14.351625000 | -0.128761000 |
| H | 14.372619000 | 14.354072000 | 0.137377000  |
| H | 10.552827000 | 14.362837000 | 3.945223000  |
| H | 10.293509000 | 14.360666000 | -3.934877000 |
| H | 10.545097000 | 6.480834000  | -3.934939000 |
| H | 14.370862000 | 10.281611000 | -3.928319000 |
| H | 6.483305000  | 10.555189000 | -3.925795000 |
| C | 6.414391000  | 10.426801000 | 5.596950000  |
| C | 14.221259000 | 10.731110000 | 5.629151000  |
| C | 5.402532000  | 10.240221000 | 6.533402000  |
| C | 15.181830000 | 10.796463000 | 6.634569000  |
| C | 5.505774000  | 3.875285000  | 0.459935000  |
| C | 6.501433000  | 4.836976000  | 0.319646000  |
| C | 16.933263000 | 10.543713000 | 4.984043000  |
| C | 3.914461000  | 9.498808000  | 4.777028000  |
| C | 4.813185000  | 6.572650000  | 0.268775000  |
| C | 15.976757000 | 10.482532000 | 3.975134000  |
| C | 4.921801000  | 9.693600000  | 3.837595000  |
| C | 3.819313000  | 5.608455000  | 0.406793000  |
| C | 6.183693000  | 10.152008000 | 4.242473000  |
| C | 14.615669000 | 10.572016000 | 4.292894000  |
| C | 4.153435000  | 9.772715000  | 6.125006000  |
| C | 16.536999000 | 10.700845000 | 6.313311000  |
| C | 4.164818000  | 4.259307000  | 0.503420000  |
| C | 6.161487000  | 6.192657000  | 0.223771000  |
| H | 7.394520000  | 10.787429000 | 5.917272000  |
| H | 13.155342000 | 10.810687000 | 5.858421000  |
| H | 5.594978000  | 10.449313000 | 7.587369000  |

|    |              |              |              |
|----|--------------|--------------|--------------|
| H  | 14.874202000 | 10.926301000 | 7.674646000  |
| H  | 5.775735000  | 2.820022000  | 0.538883000  |
| H  | 7.554494000  | 4.553163000  | 0.289596000  |
| H  | 17.994159000 | 10.469578000 | 4.735031000  |
| H  | 2.936902000  | 9.130309000  | 4.458538000  |
| H  | 4.563696000  | 7.632438000  | 0.189706000  |
| H  | 16.264340000 | 10.362462000 | 2.929027000  |
| H  | 4.755378000  | 9.485535000  | 2.778819000  |
| H  | 2.769244000  | 5.907829000  | 0.438642000  |
| H  | 8.451227000  | 12.361782000 | 2.001342000  |
| O  | 8.459402000  | 10.419240000 | 3.638279000  |
| O  | 12.375597000 | 10.466752000 | 3.583005000  |
| O  | 10.464246000 | 12.390453000 | 3.583288000  |
| O  | 10.476604000 | 13.978411000 | 1.977296000  |
| O  | 8.424988000  | 6.828705000  | 0.041394000  |
| O  | 12.400411000 | 13.982424000 | 0.061079000  |
| O  | 6.855858000  | 8.438074000  | 0.052489000  |
| O  | 13.993122000 | 12.381973000 | 0.072601000  |
| O  | 13.984587000 | 10.467090000 | 2.019230000  |
| O  | 6.902366000  | 10.333445000 | 2.017054000  |
| O  | 9.015539000  | 11.821030000 | 1.438608000  |
| O  | 11.821585000 | 8.952601000  | 1.458047000  |
| O  | 9.372523000  | 9.329863000  | 1.099210000  |
| O  | 11.472028000 | 11.454732000 | 1.067431000  |
| Hf | 10.429689000 | 12.929147000 | 0.009879000  |
| Hf | 10.439999000 | 7.855941000  | 0.010028000  |
| Hf | 10.444851000 | 10.414594000 | 2.524876000  |
| Hf | 12.950678000 | 10.382978000 | 0.037448000  |
| Hf | 7.921998000  | 10.388523000 | 0.028589000  |
| H  | 15.072171000 | 2.825481000  | -0.314697000 |
| H  | 13.297528000 | 4.588913000  | -0.241285000 |
| H  | 16.311103000 | 7.639585000  | -0.096522000 |
| H  | 18.099042000 | 5.890986000  | -0.172494000 |
| H  | 8.442309000  | 8.436385000  | -1.935687000 |
| H  | 12.408496000 | 12.386348000 | -1.949262000 |
| C  | 15.347370000 | 3.881570000  | -0.266929000 |
| C  | 14.355645000 | 4.857111000  | -0.226232000 |
| C  | 16.056030000 | 6.579391000  | -0.144716000 |
| C  | 17.045762000 | 5.601692000  | -0.187056000 |
| C  | 16.692839000 | 4.252624000  | -0.247730000 |
| C  | 14.704425000 | 6.212486000  | -0.164480000 |
| O  | 8.455131000  | 10.460632000 | -3.550062000 |
| O  | 12.400126000 | 10.370535000 | -3.553063000 |
| O  | 10.482007000 | 8.445698000  | -3.539306000 |
| O  | 10.378004000 | 12.389027000 | -3.553883000 |
| O  | 10.375846000 | 13.986667000 | -1.961934000 |

|    |              |              |              |
|----|--------------|--------------|--------------|
| O  | 10.448409000 | 6.828670000  | -1.962471000 |
| O  | 8.453488000  | 13.980432000 | -0.034514000 |
| O  | 12.443268000 | 6.868884000  | -0.154146000 |
| O  | 14.016881000 | 8.463799000  | -0.028114000 |
| O  | 6.861571000  | 12.380548000 | -0.014278000 |
| O  | 13.997068000 | 10.373804000 | -1.956780000 |
| O  | 6.860469000  | 10.459608000 | -1.953667000 |
| O  | 11.846795000 | 11.833085000 | -1.396201000 |
| O  | 9.013677000  | 8.991104000  | -1.393857000 |
| O  | 11.478102000 | 9.376190000  | -1.021676000 |
| O  | 9.380928000  | 11.452196000 | -1.020106000 |
| H  | 12.345017000 | 8.399246000  | 2.074337000  |
| Hf | 10.434800000 | 10.410694000 | -2.492682000 |
| O  | 10.440110000 | 6.614658000  | 1.757576000  |
| H  | 9.644450000  | 6.062186000  | 1.773828000  |
| H  | 17.289614000 | 10.751235000 | 7.103942000  |
| H  | 17.470889000 | 3.485990000  | -0.280353000 |
| H  | 3.383997000  | 3.502842000  | 0.613588000  |
| H  | 3.361679000  | 9.618469000  | 6.861864000  |
| C  | 8.697497000  | 7.915282000  | 5.921535000  |
| C  | 10.129555000 | 8.474441000  | 5.932949000  |
| C  | 10.763076000 | 7.724194000  | 4.761936000  |
| C  | 8.833259000  | 6.536382000  | 5.267493000  |
| C  | 12.273591000 | 7.567540000  | 4.721210000  |
| C  | 7.955359000  | 6.302407000  | 4.049782000  |
| H  | 12.744697000 | 8.522099000  | 4.987925000  |
| H  | 10.641515000 | 8.158228000  | 6.861623000  |
| H  | 8.103281000  | 8.562573000  | 5.258107000  |
| H  | 9.302800000  | 5.073790000  | 3.477870000  |
| H  | 12.564705000 | 6.822479000  | 5.481813000  |
| H  | 12.162914000 | 6.526947000  | 3.055259000  |
| H  | 8.015162000  | 7.189920000  | 3.384232000  |
| H  | 6.900901000  | 6.202689000  | 4.353615000  |
| H  | 9.464478000  | 10.185672000 | 5.324294000  |
| H  | 10.306483000 | 7.639699000  | 2.828232000  |
| H  | 8.544490000  | 7.421838000  | 7.785269000  |
| H  | 8.667314000  | 5.732144000  | 6.004968000  |
| O  | 8.032756000  | 7.940319000  | 7.152735000  |
| O  | 12.739130000 | 7.214424000  | 3.437801000  |
| O  | 8.340692000  | 5.130052000  | 3.376290000  |
| O  | 10.288368000 | 8.356231000  | 3.584916000  |
| O  | 10.221202000 | 9.864007000  | 5.844815000  |
| O  | 10.210041000 | 6.430469000  | 4.853528000  |

Hf-UIO-66 TS1

|   |              |              |             |
|---|--------------|--------------|-------------|
| C | 10.500300000 | 13.573400000 | 3.164300000 |
|---|--------------|--------------|-------------|

|   |              |              |              |
|---|--------------|--------------|--------------|
| C | 13.590800000 | 10.499200000 | 3.218800000  |
| C | 7.259400000  | 10.315400000 | 3.225500000  |
| C | 13.586700000 | 13.569300000 | 0.091800000  |
| C | 7.226100000  | 7.224700000  | 0.091400000  |
| C | 10.347300000 | 13.576500000 | -3.149300000 |
| C | 10.494300000 | 7.256200000  | -3.139800000 |
| C | 13.586900000 | 10.339500000 | -3.142400000 |
| C | 7.268500000  | 10.493900000 | -3.141500000 |
| C | 7.267300000  | 13.569000000 | -0.062000000 |
| C | 13.640800000 | 7.253200000  | -0.115400000 |
| H | 6.481418000  | 14.351971000 | -0.129496000 |
| H | 14.372411000 | 14.354341000 | 0.135785000  |
| H | 10.553930000 | 14.363014000 | 3.945030000  |
| H | 10.293101000 | 14.361228000 | -3.934295000 |
| H | 10.543110000 | 6.479219000  | -3.933426000 |
| H | 14.370870000 | 10.280657000 | -3.928286000 |
| H | 6.483203000  | 10.554788000 | -3.925756000 |
| C | 6.407578000  | 10.443671000 | 5.594057000  |
| C | 14.220655000 | 10.753374000 | 5.626694000  |
| C | 5.392791000  | 10.263715000 | 6.528730000  |
| C | 15.180355000 | 10.822340000 | 6.632714000  |
| C | 5.513240000  | 3.870639000  | 0.450025000  |
| C | 6.507333000  | 4.835075000  | 0.317628000  |
| C | 16.931668000 | 10.532304000 | 4.988202000  |
| C | 3.911329000  | 9.505480000  | 4.774071000  |
| C | 4.814359000  | 6.565786000  | 0.249862000  |
| C | 15.976095000 | 10.468238000 | 3.978540000  |
| C | 4.921372000  | 9.694060000  | 3.836277000  |
| C | 3.822174000  | 5.598804000  | 0.380037000  |
| C | 6.181416000  | 10.157581000 | 4.241160000  |
| C | 14.615551000 | 10.574371000 | 4.293094000  |
| C | 4.145598000  | 9.791078000  | 6.120425000  |
| C | 16.535007000 | 10.709736000 | 6.314796000  |
| C | 4.170805000  | 4.250785000  | 0.481004000  |
| C | 6.164094000  | 6.189605000  | 0.217093000  |
| H | 7.385867000  | 10.808193000 | 5.915744000  |
| H | 13.155041000 | 10.845264000 | 5.853089000  |
| H | 5.581449000  | 10.482316000 | 7.581463000  |
| H | 14.872448000 | 10.968116000 | 7.670604000  |
| H | 5.785460000  | 2.816213000  | 0.532452000  |
| H | 7.561577000  | 4.554831000  | 0.297610000  |
| H | 17.992175000 | 10.444775000 | 4.741834000  |
| H | 2.935324000  | 9.132892000  | 4.455556000  |
| H | 4.562505000  | 7.624793000  | 0.167639000  |
| H | 16.264001000 | 10.332919000 | 2.934381000  |
| H | 4.758543000  | 9.477147000  | 2.778686000  |

|    |              |              |              |
|----|--------------|--------------|--------------|
| H  | 2.770995000  | 5.895089000  | 0.402332000  |
| H  | 8.451820000  | 12.361708000 | 2.001738000  |
| O  | 8.457528000  | 10.422140000 | 3.639471000  |
| O  | 12.376804000 | 10.473300000 | 3.582025000  |
| O  | 10.463181000 | 12.390601000 | 3.583139000  |
| O  | 10.476288000 | 13.978761000 | 1.977109000  |
| O  | 8.428070000  | 6.832173000  | 0.050009000  |
| O  | 12.400356000 | 13.981494000 | 0.061325000  |
| O  | 6.854254000  | 8.436889000  | 0.048625000  |
| O  | 13.993855000 | 12.382036000 | 0.073999000  |
| O  | 13.986590000 | 10.462318000 | 2.019197000  |
| O  | 6.903414000  | 10.327012000 | 2.016291000  |
| O  | 9.014817000  | 11.818816000 | 1.439780000  |
| O  | 11.826884000 | 8.956629000  | 1.452160000  |
| O  | 9.374332000  | 9.333296000  | 1.094048000  |
| O  | 11.470966000 | 11.451889000 | 1.068757000  |
| Hf | 10.429983000 | 12.925811000 | 0.013490000  |
| Hf | 10.440922000 | 7.867726000  | 0.005978000  |
| Hf | 10.443909000 | 10.404908000 | 2.534858000  |
| Hf | 12.950531000 | 10.386225000 | 0.040190000  |
| Hf | 7.921300000  | 10.390341000 | 0.028920000  |
| H  | 15.068627000 | 2.825044000  | -0.344317000 |
| H  | 13.295123000 | 4.588138000  | -0.251594000 |
| H  | 16.310229000 | 7.637832000  | -0.112846000 |
| H  | 18.097130000 | 5.889177000  | -0.207651000 |
| H  | 8.442387000  | 8.435558000  | -1.936988000 |
| H  | 12.408190000 | 12.386895000 | -1.947962000 |
| C  | 15.344426000 | 3.880806000  | -0.293090000 |
| C  | 14.353258000 | 4.856406000  | -0.241348000 |
| C  | 16.054588000 | 6.577908000  | -0.163648000 |
| C  | 17.043725000 | 5.600173000  | -0.216591000 |
| C  | 16.690078000 | 4.251458000  | -0.280889000 |
| C  | 14.702710000 | 6.211462000  | -0.175720000 |
| O  | 8.454998000  | 10.461020000 | -3.550884000 |
| O  | 12.400015000 | 10.370102000 | -3.553636000 |
| O  | 10.480698000 | 8.444905000  | -3.540651000 |
| O  | 10.378580000 | 12.389200000 | -3.555677000 |
| O  | 10.375788000 | 13.984765000 | -1.961677000 |
| O  | 10.452277000 | 6.830646000  | -1.961035000 |
| O  | 8.453593000  | 13.979247000 | -0.033874000 |
| O  | 12.440697000 | 6.867705000  | -0.136135000 |
| O  | 14.016945000 | 8.462849000  | -0.036769000 |
| O  | 6.860568000  | 12.380641000 | -0.014194000 |
| O  | 13.996519000 | 10.375225000 | -1.956883000 |
| O  | 6.860639000  | 10.459657000 | -1.953865000 |
| O  | 11.846664000 | 11.832470000 | -1.395883000 |

|    |              |              |              |
|----|--------------|--------------|--------------|
| O  | 9.013548000  | 8.991330000  | -1.396012000 |
| O  | 11.477890000 | 9.375996000  | -1.024759000 |
| O  | 9.380444000  | 11.451714000 | -1.021625000 |
| H  | 12.345840000 | 8.405037000  | 2.073579000  |
| Hf | 10.434111000 | 10.413394000 | -2.495490000 |
| O  | 10.422606000 | 6.667628000  | 1.810615000  |
| H  | 9.621793000  | 6.121915000  | 1.856153000  |
| H  | 17.286939000 | 10.762739000 | 7.105916000  |
| H  | 17.467684000 | 3.484806000  | -0.322043000 |
| H  | 3.391256000  | 3.492124000  | 0.584841000  |
| H  | 3.351711000  | 9.642040000  | 6.856062000  |
| C  | 8.715265000  | 7.954468000  | 5.929515000  |
| C  | 10.144681000 | 8.517379000  | 5.924758000  |
| C  | 10.776768000 | 7.762182000  | 4.754803000  |
| C  | 8.850293000  | 6.573502000  | 5.279101000  |
| C  | 12.289493000 | 7.606510000  | 4.739542000  |
| C  | 7.971300000  | 6.345234000  | 4.060686000  |
| H  | 12.754660000 | 8.562697000  | 5.009000000  |
| H  | 10.662260000 | 8.211081000  | 6.854006000  |
| H  | 8.110224000  | 8.595805000  | 5.270839000  |
| H  | 9.313791000  | 5.087707000  | 3.535961000  |
| H  | 12.573433000 | 6.865006000  | 5.506160000  |
| H  | 12.242967000 | 6.524829000  | 3.104187000  |
| H  | 8.028913000  | 7.235429000  | 3.399242000  |
| H  | 6.917154000  | 6.240815000  | 4.364793000  |
| H  | 9.465378000  | 10.224307000 | 5.318439000  |
| H  | 10.330620000 | 7.585298000  | 2.776739000  |
| H  | 8.589937000  | 7.475557000  | 7.799136000  |
| H  | 8.675738000  | 5.772283000  | 6.018098000  |
| O  | 8.063239000  | 7.980945000  | 7.168335000  |
| O  | 12.779139000 | 7.252213000  | 3.464050000  |
| O  | 8.362315000  | 5.178576000  | 3.375618000  |
| O  | 10.312312000 | 8.363277000  | 3.572740000  |
| O  | 10.233170000 | 9.907268000  | 5.824578000  |
| O  | 10.226352000 | 6.459914000  | 4.872273000  |

## Hf-UIO-66 Int1

|   |              |              |              |
|---|--------------|--------------|--------------|
| C | 10.500297000 | 13.573398000 | 3.164325000  |
| C | 13.590817000 | 10.499225000 | 3.218820000  |
| C | 7.259410000  | 10.315411000 | 3.225499000  |
| C | 13.586705000 | 13.569298000 | 0.091799000  |
| C | 7.226092000  | 7.224705000  | 0.091370000  |
| C | 10.347297000 | 13.576490000 | -3.149302000 |
| C | 10.494281000 | 7.256195000  | -3.139807000 |
| C | 13.586902000 | 10.339497000 | -3.142403000 |
| C | 7.268500000  | 10.493887000 | -3.141503000 |

|   |              |              |              |
|---|--------------|--------------|--------------|
| C | 7.267299000  | 13.568992000 | -0.061996000 |
| C | 13.640800000 | 7.253202000  | -0.115402000 |
| H | 6.482554000  | 14.353447000 | -0.126349000 |
| H | 14.372334000 | 14.354457000 | 0.133744000  |
| H | 10.557575000 | 14.365428000 | 3.942413000  |
| H | 10.293063000 | 14.362944000 | -3.932618000 |
| H | 10.542973000 | 6.476869000  | -3.931124000 |
| H | 14.371550000 | 10.282434000 | -3.927906000 |
| H | 6.482920000  | 10.556145000 | -3.925522000 |
| C | 6.385393000  | 10.432648000 | 5.584974000  |
| C | 14.251481000 | 10.796431000 | 5.614206000  |
| C | 5.367113000  | 10.237937000 | 6.513102000  |
| C | 15.221385000 | 10.861914000 | 6.610677000  |
| C | 5.529283000  | 3.848348000  | 0.292286000  |
| C | 6.517254000  | 4.822703000  | 0.191531000  |
| C | 16.947449000 | 10.464164000 | 4.962633000  |
| C | 3.909631000  | 9.452616000  | 4.750335000  |
| C | 4.823209000  | 6.548749000  | 0.301292000  |
| C | 15.981550000 | 10.404374000 | 3.962382000  |
| C | 4.923077000  | 9.656276000  | 3.818898000  |
| C | 3.836596000  | 5.572195000  | 0.406720000  |
| C | 6.172584000  | 10.140173000 | 4.231221000  |
| C | 14.628208000 | 10.566365000 | 4.283239000  |
| C | 4.130358000  | 9.744064000  | 6.097679000  |
| C | 16.568708000 | 10.693848000 | 6.286379000  |
| C | 4.188338000  | 4.221716000  | 0.402081000  |
| C | 6.170391000  | 6.179856000  | 0.195091000  |
| H | 7.358520000  | 10.808949000 | 5.908289000  |
| H | 13.191543000 | 10.927147000 | 5.848472000  |
| H | 5.544355000  | 10.462154000 | 7.566719000  |
| H | 14.926522000 | 11.047106000 | 7.646070000  |
| H | 5.802535000  | 2.790595000  | 0.283315000  |
| H | 7.571241000  | 4.552074000  | 0.107910000  |
| H | 18.002229000 | 10.332827000 | 4.710820000  |
| H | 2.941229000  | 9.065113000  | 4.425926000  |
| H | 4.568047000  | 7.610134000  | 0.295952000  |
| H | 16.256154000 | 10.229762000 | 2.920485000  |
| H | 4.770355000  | 9.436845000  | 2.760203000  |
| H | 2.787124000  | 5.863675000  | 0.489279000  |
| H | 8.450930000  | 12.351928000 | 2.001358000  |
| O | 8.442756000  | 10.461056000 | 3.649802000  |
| O | 12.384746000 | 10.523928000 | 3.585760000  |
| O | 10.456585000 | 12.392060000 | 3.584362000  |
| O | 10.478115000 | 13.976690000 | 1.975225000  |
| O | 8.433172000  | 6.839010000  | 0.053397000  |
| O | 12.400550000 | 13.979459000 | 0.058971000  |



|    |              |              |              |
|----|--------------|--------------|--------------|
| O  | 6.847425000  | 8.432726000  | 0.050961000  |
| O  | 13.995323000 | 12.381576000 | 0.078174000  |
| O  | 13.983838000 | 10.431115000 | 2.015483000  |
| O  | 6.908256000  | 10.307291000 | 2.010505000  |
| O  | 9.012175000  | 11.812079000 | 1.434787000  |
| O  | 11.819537000 | 8.936828000  | 1.458498000  |
| O  | 9.369046000  | 9.319229000  | 1.088866000  |
| O  | 11.471769000 | 11.440293000 | 1.065265000  |
| Hf | 10.432005000 | 12.915148000 | 0.022437000  |
| Hf | 10.440261000 | 7.893345000  | -0.013352000 |
| Hf | 10.434101000 | 10.380027000 | 2.559728000  |
| Hf | 12.949871000 | 10.391310000 | 0.051390000  |
| Hf | 7.917907000  | 10.392835000 | 0.033196000  |
| H  | 15.068100000 | 2.825564000  | -0.389678000 |
| H  | 13.294063000 | 4.586979000  | -0.281038000 |
| H  | 16.307788000 | 7.635969000  | -0.105213000 |
| H  | 18.095428000 | 5.888780000  | -0.213990000 |
| H  | 8.441934000  | 8.431999000  | -1.941465000 |
| H  | 12.408082000 | 12.385503000 | -1.947670000 |
| C  | 15.343473000 | 3.880764000  | -0.325676000 |
| C  | 14.352000000 | 4.855579000  | -0.264761000 |
| C  | 16.052717000 | 6.576483000  | -0.166838000 |
| C  | 17.042164000 | 5.599567000  | -0.227878000 |
| C  | 16.689027000 | 4.251514000  | -0.306956000 |
| C  | 14.700823000 | 6.209996000  | -0.184060000 |
| O  | 8.454650000  | 10.462103000 | -3.553611000 |
| O  | 12.399760000 | 10.367417000 | -3.555683000 |
| O  | 10.479868000 | 8.443244000  | -3.541544000 |
| O  | 10.378866000 | 12.389656000 | -3.561171000 |
| O  | 10.375605000 | 13.979037000 | -1.961132000 |
| O  | 10.453431000 | 6.831808000  | -1.959446000 |
| O  | 8.454145000  | 13.975584000 | -0.034683000 |
| O  | 12.436211000 | 6.865059000  | -0.118777000 |
| O  | 14.014809000 | 8.460600000  | -0.048187000 |
| O  | 6.857431000  | 12.380790000 | -0.017456000 |
| O  | 13.994049000 | 10.375376000 | -1.956589000 |
| O  | 6.861038000  | 10.456648000 | -1.954475000 |
| O  | 11.846662000 | 11.828768000 | -1.397848000 |
| O  | 9.011617000  | 8.991202000  | -1.402465000 |
| O  | 11.475260000 | 9.372038000  | -1.029317000 |
| O  | 9.379699000  | 11.446513000 | -1.024976000 |
| H  | 12.328716000 | 8.404363000  | 2.104207000  |
| Hf | 10.431978000 | 10.421925000 | -2.502335000 |
| O  | 10.422592000 | 6.644399000  | 1.871360000  |
| H  | 9.657645000  | 6.068646000  | 2.095904000  |
| H  | 17.328714000 | 10.743874000 | 7.070005000  |

|   |              |              |              |
|---|--------------|--------------|--------------|
| H | 17.466886000 | 3.485541000  | -0.355000000 |
| H | 3.413192000  | 3.455587000  | 0.481171000  |
| H | 3.334011000  | 9.583826000  | 6.828393000  |
| C | 8.692844000  | 7.925032000  | 5.963560000  |
| C | 10.116742000 | 8.483893000  | 6.074308000  |
| C | 10.780688000 | 7.900744000  | 4.819503000  |
| C | 8.859275000  | 6.635405000  | 5.143765000  |
| C | 12.290557000 | 7.732773000  | 4.868117000  |
| C | 7.944158000  | 6.607553000  | 3.929219000  |
| H | 12.748795000 | 8.691914000  | 5.136237000  |
| H | 10.608706000 | 8.063316000  | 6.971434000  |
| H | 8.110044000  | 8.644778000  | 5.369373000  |
| H | 8.146529000  | 4.700129000  | 3.531742000  |
| H | 12.557228000 | 6.999541000  | 5.648619000  |
| H | 12.437556000 | 6.504790000  | 3.362030000  |
| H | 8.093462000  | 7.523053000  | 3.333618000  |
| H | 6.889311000  | 6.606435000  | 4.264505000  |
| H | 9.636526000  | 10.250601000 | 5.483474000  |
| H | 10.420680000 | 7.323703000  | 2.604974000  |
| H | 8.538580000  | 7.278971000  | 7.778298000  |
| H | 8.649715000  | 5.754857000  | 5.781196000  |
| O | 7.991215000  | 7.788438000  | 7.169089000  |
| O | 12.821190000 | 7.358647000  | 3.609165000  |
| O | 8.210203000  | 5.531770000  | 3.047117000  |
| O | 10.370552000 | 8.594656000  | 3.716491000  |
| O | 10.195954000 | 9.872971000  | 6.181653000  |
| O | 10.233025000 | 6.566431000  | 4.773840000  |

## Hf-UIO-66 TS2

|   |              |              |              |
|---|--------------|--------------|--------------|
| C | 10.500300000 | 13.573400000 | 3.164300000  |
| C | 13.590800000 | 10.499200000 | 3.218800000  |
| C | 7.259400000  | 10.315400000 | 3.225500000  |
| C | 13.586700000 | 13.569300000 | 0.091800000  |
| C | 7.226100000  | 7.224700000  | 0.091400000  |
| C | 10.347300000 | 13.576500000 | -3.149300000 |
| C | 10.494300000 | 7.256200000  | -3.139800000 |
| C | 13.586900000 | 10.339500000 | -3.142400000 |
| C | 7.268500000  | 10.493900000 | -3.141500000 |
| C | 7.267300000  | 13.569000000 | -0.062000000 |
| C | 13.640800000 | 7.253200000  | -0.115400000 |
| H | 6.481651000  | 14.353134000 | -0.121624000 |
| H | 14.373055000 | 14.353552000 | 0.140912000  |
| H | 10.558947000 | 14.364990000 | 3.942901000  |
| H | 10.294893000 | 14.359717000 | -3.936045000 |
| H | 10.551632000 | 6.477572000  | -3.931490000 |
| H | 14.370792000 | 10.287625000 | -3.928909000 |

|   |              |              |              |
|---|--------------|--------------|--------------|
| H | 6.484579000  | 10.564338000 | -3.926475000 |
| C | 6.506934000  | 10.093890000 | 5.615534000  |
| C | 14.287717000 | 10.557938000 | 5.626496000  |
| C | 5.521835000  | 9.822462000  | 6.559983000  |
| C | 15.271166000 | 10.527343000 | 6.611137000  |
| C | 5.423166000  | 3.889335000  | 0.052580000  |
| C | 6.419717000  | 4.851550000  | -0.090191000 |
| C | 16.976165000 | 10.346523000 | 4.905041000  |
| C | 3.898823000  | 9.552732000  | 4.787956000  |
| C | 4.873757000  | 6.560866000  | 0.658179000  |
| C | 15.995061000 | 10.376635000 | 3.918083000  |
| C | 4.883491000  | 9.821040000  | 3.842289000  |
| C | 3.884126000  | 5.593689000  | 0.813823000  |
| C | 6.198631000  | 10.087662000 | 4.249011000  |
| C | 14.644316000 | 10.481444000 | 4.272789000  |
| C | 4.217758000  | 9.549577000  | 6.147366000  |
| C | 16.615829000 | 10.421621000 | 6.251343000  |
| C | 4.156845000  | 4.258862000  | 0.509954000  |
| C | 6.150957000  | 6.194095000  | 0.214100000  |
| H | 7.530417000  | 10.304473000 | 5.931483000  |
| H | 13.230883000 | 10.642323000 | 5.891156000  |
| H | 5.777508000  | 9.812589000  | 7.621251000  |
| H | 14.989204000 | 10.588660000 | 7.664675000  |
| H | 5.634135000  | 2.845883000  | -0.191199000 |
| H | 7.419890000  | 4.579931000  | -0.435874000 |
| H | 18.028643000 | 10.263549000 | 4.624794000  |
| H | 2.876134000  | 9.343158000  | 4.466015000  |
| H | 4.679768000  | 7.611872000  | 0.881655000  |
| H | 16.255497000 | 10.317945000 | 2.859760000  |
| H | 4.654885000  | 9.826767000  | 2.774985000  |
| H | 2.892947000  | 5.880871000  | 1.171641000  |
| H | 8.444949000  | 12.355176000 | 2.001930000  |
| O | 8.453392000  | 10.416845000 | 3.627485000  |
| O | 12.390450000 | 10.542150000 | 3.601755000  |
| O | 10.454083000 | 12.392726000 | 3.585795000  |
| O | 10.479346000 | 13.977365000 | 1.976349000  |
| O | 8.412043000  | 6.809925000  | -0.008713000 |
| O | 12.400905000 | 13.983247000 | 0.057672000  |
| O | 6.854661000  | 8.433688000  | 0.099577000  |
| O | 13.992685000 | 12.381777000 | 0.071764000  |
| O | 13.970895000 | 10.455005000 | 2.011950000  |
| O | 6.883743000  | 10.364649000 | 2.016356000  |
| O | 9.012329000  | 11.824136000 | 1.433099000  |
| O | 11.800331000 | 8.948530000  | 1.469406000  |
| O | 9.352123000  | 9.316264000  | 1.111556000  |
| O | 11.468524000 | 11.454191000 | 1.062458000  |

|    |              |              |              |
|----|--------------|--------------|--------------|
| Hf | 10.430366000 | 12.928422000 | 0.011481000  |
| Hf | 10.434493000 | 7.859516000  | 0.037003000  |
| Hf | 10.435352000 | 10.411284000 | 2.530272000  |
| Hf | 12.945241000 | 10.384118000 | 0.041696000  |
| Hf | 7.916952000  | 10.396965000 | 0.037368000  |
| H  | 15.077164000 | 2.827958000  | -0.350300000 |
| H  | 13.300432000 | 4.588499000  | -0.256066000 |
| H  | 16.309827000 | 7.642730000  | -0.112694000 |
| H  | 18.100288000 | 5.897159000  | -0.210192000 |
| H  | 8.448998000  | 8.429784000  | -1.929616000 |
| H  | 12.406378000 | 12.380583000 | -1.952874000 |
| C  | 15.351111000 | 3.884214000  | -0.298342000 |
| C  | 14.358305000 | 4.858211000  | -0.245864000 |
| C  | 16.056447000 | 6.582348000  | -0.165562000 |
| C  | 17.047354000 | 5.606334000  | -0.219715000 |
| C  | 16.696151000 | 4.257071000  | -0.285681000 |
| C  | 14.705346000 | 6.213707000  | -0.178839000 |
| O  | 8.455256000  | 10.458133000 | -3.548149000 |
| O  | 12.399213000 | 10.365235000 | -3.552181000 |
| O  | 10.473862000 | 8.444416000  | -3.543006000 |
| O  | 10.376282000 | 12.387992000 | -3.552230000 |
| O  | 10.376023000 | 13.987428000 | -1.962374000 |
| O  | 10.448933000 | 6.835103000  | -1.958734000 |
| O  | 8.453204000  | 13.979531000 | -0.035835000 |
| O  | 12.443197000 | 6.867521000  | -0.143164000 |
| O  | 14.014933000 | 8.463202000  | -0.023926000 |
| O  | 6.858265000  | 12.381675000 | -0.022086000 |
| O  | 13.996160000 | 10.372029000 | -1.956514000 |
| O  | 6.857808000  | 10.451059000 | -1.953904000 |
| O  | 11.844972000 | 11.829400000 | -1.397474000 |
| O  | 9.009451000  | 8.989048000  | -1.381494000 |
| O  | 11.472322000 | 9.367793000  | -1.015048000 |
| O  | 9.377856000  | 11.449849000 | -1.018470000 |
| H  | 12.324783000 | 8.393465000  | 2.083619000  |
| Hf | 10.433541000 | 10.406790000 | -2.486857000 |
| O  | 10.409671000 | 6.427905000  | 1.668906000  |
| H  | 9.784638000  | 5.720468000  | 1.451269000  |
| H  | 17.387306000 | 10.398325000 | 7.024858000  |
| H  | 17.475104000 | 3.491792000  | -0.327530000 |
| H  | 3.378193000  | 3.501992000  | 0.629368000  |
| H  | 3.445104000  | 9.332489000  | 6.888826000  |
| C  | 8.749523000  | 7.448106000  | 5.653344000  |
| C  | 10.195336000 | 7.812001000  | 6.012573000  |
| C  | 10.925842000 | 7.834703000  | 4.677062000  |
| C  | 8.817012000  | 6.267671000  | 4.679216000  |
| C  | 12.356428000 | 7.361992000  | 4.579222000  |

|   |              |             |             |
|---|--------------|-------------|-------------|
| C | 7.764102000  | 6.330938000 | 3.603058000 |
| H | 12.987964000 | 8.158525000 | 5.006897000 |
| H | 10.626005000 | 7.051168000 | 6.687030000 |
| H | 8.339004000  | 8.323438000 | 5.121174000 |
| H | 7.156687000  | 5.169085000 | 2.166251000 |
| H | 12.493192000 | 6.464471000 | 5.204919000 |
| H | 12.206368000 | 6.503156000 | 2.821409000 |
| H | 7.923461000  | 7.256002000 | 3.005121000 |
| H | 6.777950000  | 6.427029000 | 4.099308000 |
| H | 10.019300000 | 9.724629000 | 6.027940000 |
| H | 10.171239000 | 6.361225000 | 3.059087000 |
| H | 8.268799000  | 6.527747000 | 7.283172000 |
| H | 8.696799000  | 5.321463000 | 5.240157000 |
| O | 7.901814000  | 7.238373000 | 6.743044000 |
| O | 12.787454000 | 7.153185000 | 3.259234000 |
| O | 7.867176000  | 5.169563000 | 2.820628000 |
| O | 10.501868000 | 8.737837000 | 3.900436000 |
| O | 10.315102000 | 9.048705000 | 6.657360000 |
| O | 10.135905000 | 6.262194000 | 4.125878000 |

## Hf-UIO-66 Int2

|   |              |              |              |
|---|--------------|--------------|--------------|
| C | 10.500300000 | 13.573400000 | 3.164300000  |
| C | 13.590800000 | 10.499200000 | 3.218800000  |
| C | 7.259400000  | 10.315400000 | 3.225500000  |
| C | 13.586700000 | 13.569300000 | 0.091800000  |
| C | 7.226100000  | 7.224700000  | 0.091400000  |
| C | 10.347300000 | 13.576500000 | -3.149300000 |
| C | 10.494300000 | 7.256200000  | -3.139800000 |
| C | 13.586900000 | 10.339500000 | -3.142400000 |
| C | 7.268500000  | 10.493900000 | -3.141500000 |
| C | 7.267300000  | 13.569000000 | -0.062000000 |
| C | 13.640800000 | 7.253200000  | -0.115400000 |
| H | 6.480633000  | 14.351875000 | -0.120338000 |
| H | 14.372874000 | 14.353244000 | 0.145841000  |
| H | 10.557732000 | 14.364801000 | 3.942967000  |
| H | 10.298158000 | 14.358509000 | -3.937183000 |
| H | 10.553060000 | 6.475910000  | -3.929181000 |
| H | 14.370840000 | 10.291503000 | -3.928808000 |
| H | 6.484961000  | 10.564425000 | -3.926306000 |
| C | 6.489963000  | 10.133872000 | 5.612179000  |
| C | 14.282731000 | 10.522971000 | 5.628401000  |
| C | 5.508637000  | 9.837812000  | 6.552668000  |
| C | 15.265194000 | 10.481599000 | 6.613581000  |
| C | 5.453537000  | 3.900800000  | -0.252015000 |
| C | 6.464256000  | 4.852594000  | -0.178024000 |
| C | 16.973713000 | 10.344682000 | 4.906728000  |

|    |              |              |              |
|----|--------------|--------------|--------------|
| C  | 3.931941000  | 9.409862000  | 4.769095000  |
| C  | 4.808521000  | 6.583738000  | 0.166210000  |
| C  | 15.993691000 | 10.385122000 | 3.919180000  |
| C  | 4.911678000  | 9.707685000  | 3.827419000  |
| C  | 3.798390000  | 5.628144000  | 0.101757000  |
| C  | 6.201837000  | 10.066260000 | 4.243220000  |
| C  | 14.641658000 | 10.473197000 | 4.273975000  |
| C  | 4.229835000  | 9.472980000  | 6.131756000  |
| C  | 16.611044000 | 10.392346000 | 6.253646000  |
| C  | 4.119494000  | 4.286754000  | -0.109007000 |
| C  | 6.148779000  | 6.201117000  | 0.029694000  |
| H  | 7.494909000  | 10.416254000 | 5.931764000  |
| H  | 13.225286000 | 10.596184000 | 5.893760000  |
| H  | 5.747501000  | 9.878524000  | 7.617073000  |
| H  | 14.981552000 | 10.521820000 | 7.667638000  |
| H  | 5.704507000  | 2.850581000  | -0.416075000 |
| H  | 7.512444000  | 4.564372000  | -0.277239000 |
| H  | 18.027122000 | 10.275021000 | 4.626533000  |
| H  | 2.930733000  | 9.121779000  | 4.441087000  |
| H  | 4.575972000  | 7.638651000  | 0.323088000  |
| H  | 16.256097000 | 10.347599000 | 2.860367000  |
| H  | 4.702195000  | 9.654629000  | 2.757250000  |
| H  | 2.754492000  | 5.929708000  | 0.213525000  |
| H  | 8.441338000  | 12.351344000 | 2.001904000  |
| O  | 8.458733000  | 10.408999000 | 3.626171000  |
| O  | 12.386643000 | 10.525597000 | 3.602719000  |
| O  | 10.457528000 | 12.392799000 | 3.587220000  |
| O  | 10.477758000 | 13.976359000 | 1.976889000  |
| O  | 8.427192000  | 6.827658000  | 0.071079000  |
| O  | 12.400766000 | 13.983178000 | 0.056500000  |
| O  | 6.864151000  | 8.439998000  | 0.124320000  |
| O  | 13.992444000 | 12.381843000 | 0.067261000  |
| O  | 13.969576000 | 10.473145000 | 2.012570000  |
| O  | 6.886432000  | 10.384824000 | 2.018053000  |
| O  | 9.014234000  | 11.826153000 | 1.432909000  |
| O  | 11.808346000 | 8.970450000  | 1.467387000  |
| O  | 9.360806000  | 9.311072000  | 1.128997000  |
| O  | 11.468771000 | 11.465708000 | 1.063083000  |
| Hf | 10.426187000 | 12.934656000 | 0.005747000  |
| Hf | 10.433738000 | 7.857500000  | 0.048368000  |
| Hf | 10.437975000 | 10.430865000 | 2.521843000  |
| Hf | 12.942443000 | 10.388168000 | 0.037136000  |
| Hf | 7.911626000  | 10.390203000 | 0.042036000  |
| H  | 15.123966000 | 2.852033000  | -0.507421000 |
| H  | 13.331308000 | 4.590385000  | -0.410648000 |
| H  | 16.301774000 | 7.656239000  | 0.029129000  |

|    |              |              |              |
|----|--------------|--------------|--------------|
| H  | 18.109351000 | 5.929453000  | -0.066102000 |
| H  | 8.440239000  | 8.424457000  | -1.918053000 |
| H  | 12.405320000 | 12.376865000 | -1.954972000 |
| C  | 15.385989000 | 3.905637000  | -0.386936000 |
| C  | 14.383766000 | 4.869555000  | -0.331213000 |
| C  | 16.059973000 | 6.598216000  | -0.086566000 |
| C  | 17.060816000 | 5.632472000  | -0.140653000 |
| C  | 16.725460000 | 4.286013000  | -0.290463000 |
| C  | 14.713875000 | 6.222427000  | -0.179605000 |
| O  | 8.455958000  | 10.455911000 | -3.546976000 |
| O  | 12.398790000 | 10.364466000 | -3.550349000 |
| O  | 10.471683000 | 8.444038000  | -3.543345000 |
| O  | 10.373791000 | 12.387239000 | -3.548970000 |
| O  | 10.374999000 | 13.989613000 | -1.962750000 |
| O  | 10.449043000 | 6.838822000  | -1.956087000 |
| O  | 8.453164000  | 13.981731000 | -0.036615000 |
| O  | 12.445268000 | 6.859682000  | -0.158132000 |
| O  | 14.006474000 | 8.464076000  | -0.012757000 |
| O  | 6.861553000  | 12.381040000 | -0.022719000 |
| O  | 13.995704000 | 10.368248000 | -1.955678000 |
| O  | 6.859286000  | 10.453033000 | -1.953217000 |
| O  | 11.842738000 | 11.828240000 | -1.398098000 |
| O  | 9.003886000  | 8.983939000  | -1.372849000 |
| O  | 11.467757000 | 9.364179000  | -1.012407000 |
| O  | 9.379618000  | 11.444343000 | -1.012268000 |
| H  | 12.349527000 | 8.433573000  | 2.081566000  |
| Hf | 10.429147000 | 10.403087000 | -2.485641000 |
| O  | 10.559646000 | 6.382018000  | 1.661817000  |
| H  | 10.904753000 | 5.552851000  | 1.305148000  |
| H  | 17.381650000 | 10.360665000 | 7.027658000  |
| H  | 17.512152000 | 3.528876000  | -0.333452000 |
| H  | 3.326066000  | 3.537327000  | -0.162175000 |
| H  | 3.460927000  | 9.232911000  | 6.869923000  |
| C  | 8.749286000  | 7.468917000  | 5.682959000  |
| C  | 10.210523000 | 7.789146000  | 6.038107000  |
| C  | 10.978615000 | 7.898733000  | 4.739150000  |
| C  | 8.686948000  | 6.285779000  | 4.700627000  |
| C  | 12.348180000 | 7.310697000  | 4.575500000  |
| C  | 7.772108000  | 6.577671000  | 3.523347000  |
| H  | 13.047367000 | 8.025745000  | 5.050774000  |
| H  | 10.638929000 | 6.999485000  | 6.677104000  |
| H  | 8.370001000  | 8.371324000  | 5.170018000  |
| H  | 8.425178000  | 5.711048000  | 1.928285000  |
| H  | 12.413235000 | 6.375005000  | 5.156311000  |
| H  | 11.990440000 | 6.709366000  | 2.748163000  |
| H  | 8.102174000  | 7.525585000  | 3.047213000  |

|   |              |             |             |
|---|--------------|-------------|-------------|
| H | 6.750681000  | 6.752916000 | 3.906075000 |
| H | 9.895915000  | 9.686789000 | 6.227397000 |
| H | 10.052385000 | 6.043034000 | 3.258077000 |
| H | 8.205169000  | 6.529341000 | 7.282032000 |
| H | 8.309133000  | 5.396368000 | 5.240791000 |
| O | 7.929293000  | 7.322299000 | 6.806016000 |
| O | 12.728251000 | 7.144625000 | 3.243414000 |
| O | 7.753300000  | 5.524461000 | 2.604786000 |
| O | 10.516589000 | 8.695624000 | 3.909763000 |
| O | 10.337682000 | 8.998422000 | 6.746207000 |
| O | 10.002479000 | 5.986531000 | 4.250617000 |

## Hf-UIO-66 Int2\_Ro

|   |              |              |              |
|---|--------------|--------------|--------------|
| C | 10.500300000 | 13.573400000 | 3.164300000  |
| C | 13.590800000 | 10.499200000 | 3.218800000  |
| C | 7.259400000  | 10.315400000 | 3.225500000  |
| C | 13.586700000 | 13.569300000 | 0.091800000  |
| C | 7.226100000  | 7.224700000  | 0.091400000  |
| C | 10.347300000 | 13.576500000 | -3.149300000 |
| C | 10.494300000 | 7.256200000  | -3.139800000 |
| C | 13.586900000 | 10.339500000 | -3.142400000 |
| C | 7.268500000  | 10.493900000 | -3.141500000 |
| C | 7.267300000  | 13.569000000 | -0.062000000 |
| C | 13.640800000 | 7.253200000  | -0.115400000 |
| H | 6.482518000  | 14.352037000 | -0.137090000 |
| H | 14.372087000 | 14.354286000 | 0.136937000  |
| H | 10.568123000 | 14.363458000 | 3.942995000  |
| H | 10.298745000 | 14.359794000 | -3.935737000 |
| H | 10.562238000 | 6.479262000  | -3.931626000 |
| H | 14.370448000 | 10.287804000 | -3.928783000 |
| H | 6.484922000  | 10.565985000 | -3.926160000 |
| C | 6.586262000  | 10.720439000 | 5.602210000  |
| C | 14.281868000 | 10.521428000 | 5.626127000  |
| C | 5.613230000  | 10.838279000 | 6.588875000  |
| C | 15.265712000 | 10.504966000 | 6.610449000  |
| C | 5.523792000  | 3.849637000  | -0.091575000 |
| C | 6.512270000  | 4.826139000  | -0.023662000 |
| C | 16.977066000 | 10.437025000 | 4.902053000  |
| C | 3.890269000  | 10.395439000 | 4.947515000  |
| C | 4.811433000  | 6.548276000  | -0.024882000 |
| C | 15.995720000 | 10.452668000 | 3.915404000  |
| C | 4.860548000  | 10.289972000 | 3.954806000  |
| C | 3.824313000  | 5.570775000  | -0.097161000 |
| C | 6.215092000  | 10.444279000 | 4.278541000  |
| C | 14.641706000 | 10.494223000 | 4.271896000  |
| C | 4.265500000  | 10.670099000 | 6.263538000  |



|    |              |              |              |
|----|--------------|--------------|--------------|
| C  | 16.613514000 | 10.462787000 | 6.249421000  |
| C  | 4.178775000  | 4.221368000  | -0.128358000 |
| C  | 6.162870000  | 6.182588000  | 0.012003000  |
| H  | 7.646929000  | 10.828812000 | 5.838844000  |
| H  | 13.222513000 | 10.558144000 | 5.889169000  |
| H  | 5.904835000  | 11.053955000 | 7.618938000  |
| H  | 14.982303000 | 10.527449000 | 7.665134000  |
| H  | 5.800848000  | 2.793471000  | -0.115771000 |
| H  | 7.569234000  | 4.553927000  | 0.007335000  |
| H  | 18.032063000 | 10.404003000 | 4.621105000  |
| H  | 2.836215000  | 10.262583000 | 4.694963000  |
| H  | 4.549434000  | 7.607480000  | 0.008746000  |
| H  | 16.258577000 | 10.431550000 | 2.856256000  |
| H  | 4.584444000  | 10.075352000 | 2.920770000  |
| H  | 2.771784000  | 5.860652000  | -0.124466000 |
| H  | 8.439700000  | 12.355521000 | 2.016099000  |
| O  | 8.467896000  | 10.322800000 | 3.599387000  |
| O  | 12.384911000 | 10.513211000 | 3.601440000  |
| O  | 10.454091000 | 12.391368000 | 3.583293000  |
| O  | 10.468603000 | 13.975820000 | 1.976150000  |
| O  | 8.423017000  | 6.836553000  | 0.058801000  |
| O  | 12.399003000 | 13.980059000 | 0.063284000  |
| O  | 6.844584000  | 8.435721000  | 0.149233000  |
| O  | 13.991646000 | 12.381372000 | 0.070481000  |
| O  | 13.966680000 | 10.471733000 | 2.011561000  |
| O  | 6.865741000  | 10.268549000 | 2.021711000  |
| O  | 8.996164000  | 11.806503000 | 1.452915000  |
| O  | 11.804043000 | 8.951068000  | 1.477763000  |
| O  | 9.371949000  | 9.313726000  | 1.117385000  |
| O  | 11.457340000 | 11.451134000 | 1.071189000  |
| Hf | 10.424870000 | 12.926232000 | 0.013385000  |
| Hf | 10.431547000 | 7.855650000  | 0.039193000  |
| Hf | 10.442485000 | 10.408640000 | 2.540449000  |
| Hf | 12.942232000 | 10.384196000 | 0.040488000  |
| Hf | 7.913557000  | 10.383433000 | 0.045922000  |
| H  | 15.111563000 | 2.840786000  | -0.381711000 |
| H  | 13.322932000 | 4.586881000  | -0.318100000 |
| H  | 16.305303000 | 7.657267000  | -0.017455000 |
| H  | 18.108401000 | 5.924322000  | -0.083712000 |
| H  | 8.438798000  | 8.425954000  | -1.929082000 |
| H  | 12.402919000 | 12.380139000 | -1.946467000 |
| C  | 15.377015000 | 3.897363000  | -0.301416000 |
| C  | 14.377336000 | 4.864752000  | -0.265010000 |
| C  | 16.060085000 | 6.596753000  | -0.097466000 |
| C  | 17.058378000 | 5.627548000  | -0.134625000 |
| C  | 16.718395000 | 4.277710000  | -0.235995000 |

|    |              |              |              |
|----|--------------|--------------|--------------|
| C  | 14.712452000 | 6.220919000  | -0.162271000 |
| O  | 8.455783000  | 10.457892000 | -3.546254000 |
| O  | 12.398286000 | 10.367349000 | -3.549851000 |
| O  | 10.472125000 | 8.445631000  | -3.539247000 |
| O  | 10.374574000 | 12.387230000 | -3.550106000 |
| O  | 10.373470000 | 13.985682000 | -1.961043000 |
| O  | 10.437808000 | 6.834707000  | -1.958655000 |
| O  | 8.453761000  | 13.977434000 | -0.031113000 |
| O  | 12.446100000 | 6.865069000  | -0.175956000 |
| O  | 14.007233000 | 8.465505000  | -0.009529000 |
| O  | 6.859345000  | 12.380432000 | -0.008405000 |
| O  | 13.994952000 | 10.369846000 | -1.955412000 |
| O  | 6.858326000  | 10.449481000 | -1.952628000 |
| O  | 11.841045000 | 11.828240000 | -1.392065000 |
| O  | 8.995112000  | 8.983412000  | -1.374368000 |
| O  | 11.467729000 | 9.367890000  | -1.012972000 |
| O  | 9.375270000  | 11.443769000 | -1.008211000 |
| H  | 12.347483000 | 8.403099000  | 2.080836000  |
| Hf | 10.430007000 | 10.405946000 | -2.483991000 |
| O  | 10.529610000 | 6.397416000  | 1.637017000  |
| H  | 10.441312000 | 5.509423000  | 1.267366000  |
| H  | 17.385169000 | 10.450537000 | 7.022982000  |
| H  | 17.503067000 | 3.517758000  | -0.264449000 |
| H  | 3.402285000  | 3.454459000  | -0.180791000 |
| H  | 3.502733000  | 10.753004000 | 7.041383000  |
| C  | 8.822505000  | 6.180054000  | 4.837349000  |
| C  | 9.917034000  | 7.013253000  | 5.585610000  |
| C  | 10.850632000 | 7.560494000  | 4.526781000  |
| C  | 7.756800000  | 7.073410000  | 4.213192000  |
| C  | 12.106058000 | 6.776441000  | 4.275707000  |
| C  | 6.765537000  | 6.360877000  | 3.315739000  |
| H  | 12.806268000 | 7.093788000  | 5.074115000  |
| H  | 10.497642000 | 6.288869000  | 6.189642000  |
| H  | 8.318249000  | 5.563198000  | 5.601851000  |
| H  | 6.100977000  | 7.886295000  | 2.276180000  |
| H  | 11.876954000 | 5.716946000  | 4.503114000  |
| H  | 12.034623000 | 6.577549000  | 2.387090000  |
| H  | 6.271318000  | 5.543294000  | 3.863156000  |
| H  | 7.277276000  | 5.913930000  | 2.447137000  |
| H  | 8.500696000  | 8.191683000  | 6.186400000  |
| H  | 6.252893000  | 8.074623000  | 4.914279000  |
| H  | 9.680464000  | 5.812242000  | 3.104931000  |
| H  | 8.252170000  | 7.851116000  | 3.590165000  |
| O  | 9.399081000  | 5.310414000  | 3.907621000  |
| O  | 12.701514000 | 6.939547000  | 3.036168000  |
| O  | 5.753682000  | 7.276656000  | 2.947142000  |

|   |              |             |             |
|---|--------------|-------------|-------------|
| O | 10.553660000 | 8.579144000 | 3.912596000 |
| O | 9.432758000  | 8.016036000 | 6.414789000 |
| O | 7.052960000  | 7.672531000 | 5.289002000 |

## Hf-UIO-66 TS3

|   |              |              |              |
|---|--------------|--------------|--------------|
| C | 10.500300000 | 13.573400000 | 3.164300000  |
| C | 13.590800000 | 10.499200000 | 3.218800000  |
| C | 7.259400000  | 10.315400000 | 3.225500000  |
| C | 13.586700000 | 13.569300000 | 0.091800000  |
| C | 7.226100000  | 7.224700000  | 0.091400000  |
| C | 10.347300000 | 13.576500000 | -3.149300000 |
| C | 10.494300000 | 7.256200000  | -3.139800000 |
| C | 13.586900000 | 10.339500000 | -3.142400000 |
| C | 7.268500000  | 10.493900000 | -3.141500000 |
| C | 7.267300000  | 13.569000000 | -0.062000000 |
| C | 13.640800000 | 7.253200000  | -0.115400000 |
| H | 6.481366000  | 14.352926000 | -0.119068000 |
| H | 14.372528000 | 14.354017000 | 0.139343000  |
| H | 10.557134000 | 14.367834000 | 3.940239000  |
| H | 10.293386000 | 14.361470000 | -3.934149000 |
| H | 10.530315000 | 6.474210000  | -3.929013000 |
| H | 14.371381000 | 10.281593000 | -3.927961000 |
| H | 6.482865000  | 10.550018000 | -3.925925000 |
| C | 6.278201000  | 10.241305000 | 5.553162000  |
| C | 14.279028000 | 10.513757000 | 5.626713000  |
| C | 5.290232000  | 9.811631000  | 6.435430000  |
| C | 15.257636000 | 10.464306000 | 6.615133000  |
| C | 5.590853000  | 3.926420000  | 0.984189000  |
| C | 6.545408000  | 4.862523000  | 0.596428000  |
| C | 16.969569000 | 10.300052000 | 4.914495000  |
| C | 4.127710000  | 8.727066000  | 4.609903000  |
| C | 4.859494000  | 6.596982000  | 0.634064000  |
| C | 15.992871000 | 10.349007000 | 3.923952000  |
| C | 5.106691000  | 9.171228000  | 3.724432000  |
| C | 3.906361000  | 5.660551000  | 1.025212000  |
| C | 6.191042000  | 9.924962000  | 4.192911000  |
| C | 14.641093000 | 10.455439000 | 4.274242000  |
| C | 4.217901000  | 9.049529000  | 5.967645000  |
| C | 16.603500000 | 10.357460000 | 6.260050000  |
| C | 4.271524000  | 4.325236000  | 1.205079000  |
| C | 6.188513000  | 6.206044000  | 0.424290000  |
| H | 7.125362000  | 10.826672000 | 5.916116000  |
| H | 13.220796000 | 10.599478000 | 5.883667000  |
| H | 5.358694000  | 10.067679000 | 7.494622000  |
| H | 14.972118000 | 10.511374000 | 7.668535000  |
| H | 5.874690000  | 2.880054000  | 1.118262000  |

|    |              |              |              |
|----|--------------|--------------|--------------|
| H  | 7.582524000  | 4.567757000  | 0.421744000  |
| H  | 18.022948000 | 10.216398000 | 4.637743000  |
| H  | 3.289995000  | 8.128724000  | 4.240120000  |
| H  | 4.593270000  | 7.645430000  | 0.485871000  |
| H  | 16.258344000 | 10.304724000 | 2.866174000  |
| H  | 5.061183000  | 8.930117000  | 2.659807000  |
| H  | 2.871679000  | 5.970718000  | 1.189259000  |
| H  | 8.447685000  | 12.354835000 | 1.994782000  |
| O  | 8.427140000  | 10.493000000 | 3.671346000  |
| O  | 12.394435000 | 10.582355000 | 3.591927000  |
| O  | 10.451963000 | 12.396302000 | 3.587718000  |
| O  | 10.483433000 | 13.976078000 | 1.974514000  |
| O  | 8.415908000  | 6.825187000  | -0.055203000 |
| O  | 12.401466000 | 13.981391000 | 0.056869000  |
| O  | 6.846584000  | 8.433649000  | 0.035828000  |
| O  | 13.996174000 | 12.382389000 | 0.073950000  |
| O  | 13.977503000 | 10.442674000 | 2.010062000  |
| O  | 6.906159000  | 10.378147000 | 2.013014000  |
| O  | 9.018271000  | 11.823384000 | 1.429639000  |
| O  | 11.799599000 | 8.942915000  | 1.485046000  |
| O  | 9.352008000  | 9.317366000  | 1.102297000  |
| O  | 11.471462000 | 11.447741000 | 1.058379000  |
| Hf | 10.432617000 | 12.924764000 | 0.015830000  |
| Hf | 10.438548000 | 7.907177000  | -0.001535000 |
| Hf | 10.432717000 | 10.413705000 | 2.551723000  |
| Hf | 12.955249000 | 10.394727000 | 0.053174000  |
| Hf | 7.916884000  | 10.399349000 | 0.029081000  |
| H  | 15.077590000 | 2.835306000  | -0.477144000 |
| H  | 13.300557000 | 4.587195000  | -0.303416000 |
| H  | 16.305049000 | 7.646792000  | -0.162930000 |
| H  | 18.095964000 | 5.908985000  | -0.337671000 |
| H  | 8.453560000  | 8.430921000  | -1.928364000 |
| H  | 12.409679000 | 12.386983000 | -1.952234000 |
| C  | 15.350248000 | 3.890810000  | -0.407359000 |
| C  | 14.357165000 | 4.860708000  | -0.309786000 |
| C  | 16.052358000 | 6.587213000  | -0.231832000 |
| C  | 17.043868000 | 5.615396000  | -0.329540000 |
| C  | 16.694355000 | 4.266985000  | -0.416990000 |
| C  | 14.701879000 | 6.215399000  | -0.220480000 |
| O  | 8.454867000  | 10.466614000 | -3.552632000 |
| O  | 12.399929000 | 10.366873000 | -3.555518000 |
| O  | 10.478712000 | 8.443145000  | -3.544547000 |
| O  | 10.378790000 | 12.389567000 | -3.558918000 |
| O  | 10.375222000 | 13.983146000 | -1.962362000 |
| O  | 10.469792000 | 6.839296000  | -1.956309000 |
| O  | 8.453414000  | 13.978473000 | -0.036463000 |

|    |              |              |              |
|----|--------------|--------------|--------------|
| O  | 12.435694000 | 6.864660000  | -0.099030000 |
| O  | 14.011140000 | 8.461698000  | -0.040060000 |
| O  | 6.858717000  | 12.381243000 | -0.024237000 |
| O  | 13.994914000 | 10.376629000 | -1.956668000 |
| O  | 6.860240000  | 10.459192000 | -1.954527000 |
| O  | 11.847914000 | 11.832581000 | -1.400398000 |
| O  | 9.021280000  | 9.004730000  | -1.402957000 |
| O  | 11.482622000 | 9.377084000  | -1.022753000 |
| O  | 9.381089000  | 11.450595000 | -1.024495000 |
| H  | 12.281004000 | 8.377184000  | 2.121748000  |
| Hf | 10.434979000 | 10.421120000 | -2.501577000 |
| O  | 10.314829000 | 6.504099000  | 1.749068000  |
| H  | 10.096919000 | 5.613563000  | 1.445356000  |
| H  | 17.371289000 | 10.319294000 | 7.036663000  |
| H  | 17.473767000 | 3.504960000  | -0.493481000 |
| H  | 3.524161000  | 3.591541000  | 1.515837000  |
| H  | 3.444033000  | 8.713204000  | 6.663059000  |
| C  | 8.566836000  | 6.439573000  | 4.266158000  |
| C  | 9.793099000  | 7.812717000  | 5.849606000  |
| C  | 10.692873000 | 7.917951000  | 4.805086000  |
| C  | 7.396810000  | 6.407104000  | 5.181846000  |
| C  | 11.929788000 | 7.061270000  | 4.691499000  |
| C  | 6.190751000  | 5.749002000  | 4.502442000  |
| H  | 12.725910000 | 7.535010000  | 5.292229000  |
| H  | 9.896040000  | 7.097505000  | 6.666440000  |
| H  | 9.280361000  | 5.595975000  | 4.333234000  |
| H  | 4.792502000  | 6.560200000  | 5.552489000  |
| H  | 11.750192000 | 6.075907000  | 5.166552000  |
| H  | 11.718196000 | 6.597772000  | 2.810726000  |
| H  | 6.440573000  | 4.716887000  | 4.210438000  |
| H  | 5.922308000  | 6.302424000  | 3.584043000  |
| H  | 8.871302000  | 9.369032000  | 5.281609000  |
| H  | 6.883623000  | 5.472586000  | 6.756116000  |
| H  | 9.346138000  | 6.853674000  | 2.457342000  |
| H  | 7.110607000  | 7.461708000  | 5.399184000  |
| O  | 8.455530000  | 7.100469000  | 3.184537000  |
| O  | 12.431849000 | 6.945668000  | 3.388877000  |
| O  | 5.130814000  | 5.662270000  | 5.422415000  |
| O  | 10.470190000 | 8.807821000  | 3.904376000  |
| O  | 8.876070000  | 8.775687000  | 6.063426000  |
| O  | 7.729805000  | 5.709957000  | 6.350337000  |

## Hf-UIO-66 Int3

|   |              |              |             |
|---|--------------|--------------|-------------|
| C | 10.500580000 | 13.573437000 | 3.164344000 |
| C | 13.590787000 | 10.499198000 | 3.218836000 |
| C | 7.259454000  | 10.315342000 | 3.225492000 |

|   |              |              |              |
|---|--------------|--------------|--------------|
| C | 13.586652000 | 13.569378000 | 0.091861000  |
| C | 7.226119000  | 7.224678000  | 0.091325000  |
| C | 10.347288000 | 13.576517000 | -3.149278000 |
| C | 10.494069000 | 7.256236000  | -3.139806000 |
| C | 13.586896000 | 10.339553000 | -3.142334000 |
| C | 7.268497000  | 10.493795000 | -3.141594000 |
| C | 7.267289000  | 13.568916000 | -0.062138000 |
| C | 13.640768000 | 7.253250000  | -0.115308000 |
| H | 6.483903000  | 14.354690000 | -0.129006000 |
| H | 14.371849000 | 14.354941000 | 0.133023000  |
| H | 10.569938000 | 14.370161000 | 3.937214000  |
| H | 10.296761000 | 14.364113000 | -3.931704000 |
| H | 10.537256000 | 6.473284000  | -3.927787000 |
| H | 14.371716000 | 10.277517000 | -3.927361000 |
| H | 6.482055000  | 10.554738000 | -3.924970000 |
| C | 6.488017000  | 10.229677000 | 5.618546000  |
| C | 14.306357000 | 10.633258000 | 5.615236000  |
| C | 5.480671000  | 10.101074000 | 6.571920000  |
| C | 15.294088000 | 10.619384000 | 6.595529000  |
| C | 5.524064000  | 3.885114000  | 0.632711000  |
| C | 6.515393000  | 4.846179000  | 0.454442000  |
| C | 16.983523000 | 10.317547000 | 4.891156000  |
| C | 3.831242000  | 9.957788000  | 4.808399000  |
| C | 4.816935000  | 6.544174000  | 0.163510000  |
| C | 15.997846000 | 10.333773000 | 3.908280000  |
| C | 4.839518000  | 10.076570000 | 3.853369000  |
| C | 3.826274000  | 5.581881000  | 0.333768000  |
| C | 6.176326000  | 10.207030000 | 4.252897000  |
| C | 14.652766000 | 10.490695000 | 4.264659000  |
| C | 4.152041000  | 9.962092000  | 6.169336000  |
| C | 16.633268000 | 10.460849000 | 6.234508000  |
| C | 4.178326000  | 4.252582000  | 0.573576000  |
| C | 6.169162000  | 6.183797000  | 0.226745000  |
| H | 7.529635000  | 10.346296000 | 5.923836000  |
| H | 13.252700000 | 10.754420000 | 5.877145000  |
| H | 5.733187000  | 10.111472000 | 7.634152000  |
| H | 15.020633000 | 10.733130000 | 7.646991000  |
| H | 5.798617000  | 2.844225000  | 0.818114000  |
| H | 7.572767000  | 4.576129000  | 0.495610000  |
| H | 18.031672000 | 10.192705000 | 4.610000000  |
| H | 2.788242000  | 9.870488000  | 4.492082000  |
| H | 4.561845000  | 7.591896000  | -0.008641000 |
| H | 16.250938000 | 10.223688000 | 2.852321000  |
| H | 4.610899000  | 10.070630000 | 2.785229000  |
| H | 2.773435000  | 5.868357000  | 0.287991000  |
| H | 8.444105000  | 12.353706000 | 1.999257000  |

|    |              |              |              |
|----|--------------|--------------|--------------|
| O  | 8.442091000  | 10.383898000 | 3.642132000  |
| O  | 12.400537000 | 10.586445000 | 3.600463000  |
| O  | 10.442973000 | 12.397242000 | 3.589676000  |
| O  | 10.478104000 | 13.974511000 | 1.973010000  |
| O  | 8.433179000  | 6.837510000  | 0.037391000  |
| O  | 12.400438000 | 13.977618000 | 0.058279000  |
| O  | 6.845149000  | 8.430338000  | 0.042092000  |
| O  | 13.996902000 | 12.381837000 | 0.079551000  |
| O  | 13.972275000 | 10.421586000 | 2.008467000  |
| O  | 6.883304000  | 10.334031000 | 2.015721000  |
| O  | 9.005971000  | 11.804742000 | 1.442230000  |
| O  | 11.803395000 | 8.939145000  | 1.466401000  |
| O  | 9.359749000  | 9.308661000  | 1.096956000  |
| O  | 11.466532000 | 11.436368000 | 1.066411000  |
| Hf | 10.430600000 | 12.909288000 | 0.029528000  |
| Hf | 10.447092000 | 7.932456000  | -0.012066000 |
| Hf | 10.438738000 | 10.368992000 | 2.589958000  |
| Hf | 12.947444000 | 10.400421000 | 0.058396000  |
| Hf | 7.916135000  | 10.392860000 | 0.041674000  |
| H  | 15.084648000 | 2.840376000  | -0.527572000 |
| H  | 13.303855000 | 4.587328000  | -0.356164000 |
| H  | 16.302173000 | 7.647224000  | -0.117960000 |
| H  | 18.097471000 | 5.913272000  | -0.288438000 |
| H  | 8.449962000  | 8.425099000  | -1.934295000 |
| H  | 12.406426000 | 12.387278000 | -1.945491000 |
| C  | 15.355217000 | 3.894686000  | -0.435219000 |
| C  | 14.359976000 | 4.862490000  | -0.338078000 |
| C  | 16.051940000 | 6.588600000  | -0.207043000 |
| C  | 17.045674000 | 5.618964000  | -0.302627000 |
| C  | 16.698930000 | 4.271804000  | -0.416398000 |
| C  | 14.701768000 | 6.215903000  | -0.222085000 |
| O  | 8.454120000  | 10.464646000 | -3.556081000 |
| O  | 12.399597000 | 10.368310000 | -3.557327000 |
| O  | 10.474767000 | 8.442000000  | -3.545276000 |
| O  | 10.377725000 | 12.390036000 | -3.564562000 |
| O  | 10.372460000 | 13.975414000 | -1.960638000 |
| O  | 10.465028000 | 6.838917000  | -1.955115000 |
| O  | 8.454234000  | 13.973139000 | -0.031125000 |
| O  | 12.432858000 | 6.858266000  | -0.078603000 |
| O  | 14.005848000 | 8.460513000  | -0.055621000 |
| O  | 6.854841000  | 12.381288000 | -0.018849000 |
| O  | 13.992559000 | 10.379818000 | -1.956467000 |
| O  | 6.862454000  | 10.455235000 | -1.954228000 |
| O  | 11.844110000 | 11.829044000 | -1.398093000 |
| O  | 9.014712000  | 8.996570000  | -1.403163000 |
| O  | 11.481136000 | 9.372182000  | -1.040137000 |

|    |              |              |              |
|----|--------------|--------------|--------------|
| O  | 9.378352000  | 11.441830000 | -1.022770000 |
| H  | 12.324929000 | 8.362437000  | 2.071143000  |
| Hf | 10.429700000 | 10.427799000 | -2.509200000 |
| O  | 10.393294000 | 6.412030000  | 1.803115000  |
| H  | 10.211521000 | 5.525042000  | 1.463040000  |
| H  | 17.408270000 | 10.449070000 | 7.004809000  |
| H  | 17.480133000 | 3.511548000  | -0.491834000 |
| H  | 3.400458000  | 3.498789000  | 0.715663000  |
| H  | 3.361166000  | 9.866819000  | 6.917240000  |
| C  | 7.647952000  | 6.294015000  | 4.055952000  |
| C  | 10.158437000 | 7.361063000  | 5.668868000  |
| C  | 10.980218000 | 7.850736000  | 4.711179000  |
| C  | 6.284804000  | 6.540007000  | 4.623693000  |
| C  | 12.413190000 | 7.452488000  | 4.586201000  |
| C  | 5.215109000  | 6.625366000  | 3.540657000  |
| H  | 13.076434000 | 8.281165000  | 4.881551000  |
| H  | 10.425920000 | 6.600304000  | 6.401484000  |
| H  | 8.259355000  | 5.538624000  | 4.606184000  |
| H  | 3.858816000  | 7.624826000  | 4.485553000  |
| H  | 12.628535000 | 6.616239000  | 5.275546000  |
| H  | 12.113734000 | 6.543391000  | 2.882210000  |
| H  | 5.215350000  | 5.695262000  | 2.950063000  |
| H  | 5.441047000  | 7.457198000  | 2.848343000  |
| H  | 8.845102000  | 8.571035000  | 5.125931000  |
| H  | 5.035421000  | 5.557078000  | 5.663378000  |
| H  | 9.576889000  | 6.625729000  | 2.345237000  |
| H  | 6.347051000  | 7.534250000  | 5.124207000  |
| O  | 8.050011000  | 6.829794000  | 3.039609000  |
| O  | 12.796192000 | 7.127180000  | 3.251353000  |
| O  | 3.943779000  | 6.726941000  | 4.132595000  |
| O  | 10.483170000 | 8.769805000  | 3.889389000  |
| O  | 8.889370000  | 7.852124000  | 5.789828000  |
| O  | 5.994963000  | 5.523800000  | 5.540750000  |

## Hf-UIO-66 TS4

|   |              |              |              |
|---|--------------|--------------|--------------|
| C | 10.500300000 | 13.573400000 | 3.164300000  |
| C | 13.590800000 | 10.499200000 | 3.218800000  |
| C | 7.259400000  | 10.315400000 | 3.225500000  |
| C | 13.586700000 | 13.569300000 | 0.091800000  |
| C | 7.226100000  | 7.224700000  | 0.091400000  |
| C | 10.347300000 | 13.576500000 | -3.149300000 |
| C | 10.494300000 | 7.256200000  | -3.139800000 |
| C | 13.586900000 | 10.339500000 | -3.142400000 |
| C | 7.268500000  | 10.493900000 | -3.141500000 |
| C | 7.267300000  | 13.569000000 | -0.062000000 |
| C | 13.640800000 | 7.253200000  | -0.115400000 |



|   |              |              |              |
|---|--------------|--------------|--------------|
| H | 6.483293000  | 14.353557000 | -0.131224000 |
| H | 14.372520000 | 14.354052000 | 0.134312000  |
| H | 10.566250000 | 14.367215000 | 3.939727000  |
| H | 10.296210000 | 14.361476000 | -3.934058000 |
| H | 10.545211000 | 6.478439000  | -3.932383000 |
| H | 14.371314000 | 10.285733000 | -3.928069000 |
| H | 6.483343000  | 10.559095000 | -3.925390000 |
| C | 6.566655000  | 10.166134000 | 5.629108000  |
| C | 14.287870000 | 10.495801000 | 5.623205000  |
| C | 5.582869000  | 10.065462000 | 6.607972000  |
| C | 15.269982000 | 10.431826000 | 6.607365000  |
| C | 5.481379000  | 3.870009000  | 0.287481000  |
| C | 6.477523000  | 4.831622000  | 0.148076000  |
| C | 16.973966000 | 10.264944000 | 4.898735000  |
| C | 3.875016000  | 10.058954000 | 4.894716000  |
| C | 4.834397000  | 6.580226000  | 0.463564000  |
| C | 15.993979000 | 10.327862000 | 3.912359000  |
| C | 4.856259000  | 10.159227000 | 3.913435000  |
| C | 3.840398000  | 5.616959000  | 0.608208000  |
| C | 6.208761000  | 10.214759000 | 4.275064000  |
| C | 14.644589000 | 10.443892000 | 4.269179000  |
| C | 4.237076000  | 10.012115000 | 6.242003000  |
| C | 16.613479000 | 10.316638000 | 6.246135000  |
| C | 4.162080000  | 4.261844000  | 0.519845000  |
| C | 6.161159000  | 6.193571000  | 0.234386000  |
| H | 7.624303000  | 10.208378000 | 5.897452000  |
| H | 13.231426000 | 10.589048000 | 5.883795000  |
| H | 5.864900000  | 10.027522000 | 7.662432000  |
| H | 14.989254000 | 10.474063000 | 7.662265000  |
| H | 5.732225000  | 2.809397000  | 0.214605000  |
| H | 7.513176000  | 4.541021000  | -0.039393000 |
| H | 18.025558000 | 10.174497000 | 4.617437000  |
| H | 2.821439000  | 10.015511000 | 4.609970000  |
| H | 4.602800000  | 7.644801000  | 0.529351000  |
| H | 16.254619000 | 10.287058000 | 2.853240000  |
| H | 4.594466000  | 10.195186000 | 2.854422000  |
| H | 2.807941000  | 5.922638000  | 0.791485000  |
| H | 8.440681000  | 12.351614000 | 2.000996000  |
| O | 8.465458000  | 10.324767000 | 3.610354000  |
| O | 12.395719000 | 10.595868000 | 3.596098000  |
| O | 10.437682000 | 12.395486000 | 3.589232000  |
| O | 10.485999000 | 13.972456000 | 1.974388000  |
| O | 8.420722000  | 6.823676000  | -0.008377000 |
| O | 12.399988000 | 13.979103000 | 0.059486000  |
| O | 6.859219000  | 8.437551000  | 0.076992000  |
| O | 13.993169000 | 12.380860000 | 0.077157000  |

|    |              |              |              |
|----|--------------|--------------|--------------|
| O  | 13.968638000 | 10.432449000 | 2.008784000  |
| O  | 6.875670000  | 10.372935000 | 2.021231000  |
| O  | 9.012217000  | 11.810236000 | 1.445842000  |
| O  | 11.786858000 | 8.915229000  | 1.500882000  |
| O  | 9.362641000  | 9.305799000  | 1.117038000  |
| O  | 11.461101000 | 11.434297000 | 1.064770000  |
| Hf | 10.428326000 | 12.919235000 | 0.017653000  |
| Hf | 10.429708000 | 7.876786000  | 0.009217000  |
| Hf | 10.442579000 | 10.404042000 | 2.564454000  |
| Hf | 12.946720000 | 10.386755000 | 0.047925000  |
| Hf | 7.916034000  | 10.388536000 | 0.044306000  |
| H  | 15.087354000 | 2.832528000  | -0.375032000 |
| H  | 13.306466000 | 4.587839000  | -0.282756000 |
| H  | 16.308111000 | 7.648052000  | -0.092023000 |
| H  | 18.102568000 | 5.906869000  | -0.188820000 |
| H  | 8.444754000  | 8.429931000  | -1.924591000 |
| H  | 12.405430000 | 12.381839000 | -1.947315000 |
| C  | 15.358489000 | 3.888906000  | -0.312623000 |
| C  | 14.363509000 | 4.860545000  | -0.260458000 |
| C  | 16.057234000 | 6.587662000  | -0.154995000 |
| C  | 17.050403000 | 5.614039000  | -0.208747000 |
| C  | 16.702537000 | 4.264599000  | -0.286974000 |
| C  | 14.707047000 | 6.216319000  | -0.180990000 |
| O  | 8.455679000  | 10.460730000 | -3.550938000 |
| O  | 12.399251000 | 10.367092000 | -3.552668000 |
| O  | 10.478788000 | 8.444761000  | -3.539845000 |
| O  | 10.377556000 | 12.388415000 | -3.555568000 |
| O  | 10.373580000 | 13.981931000 | -1.960856000 |
| O  | 10.452069000 | 6.832985000  | -1.959339000 |
| O  | 8.454740000  | 13.976467000 | -0.028461000 |
| O  | 12.442600000 | 6.865457000  | -0.142324000 |
| O  | 14.010204000 | 8.463230000  | -0.020270000 |
| O  | 6.859433000  | 12.381214000 | -0.018130000 |
| O  | 13.994506000 | 10.372070000 | -1.955570000 |
| O  | 6.862238000  | 10.454651000 | -1.953136000 |
| O  | 11.844412000 | 11.827445000 | -1.394595000 |
| O  | 9.014083000  | 8.993276000  | -1.389464000 |
| O  | 11.475091000 | 9.367543000  | -1.016092000 |
| O  | 9.378158000  | 11.444188000 | -1.015080000 |
| H  | 12.344726000 | 8.352154000  | 2.075813000  |
| Hf | 10.431331000 | 10.413977000 | -2.492842000 |
| O  | 10.445598000 | 6.271373000  | 1.560310000  |
| H  | 9.892983000  | 5.553464000  | 1.221902000  |
| H  | 17.384026000 | 10.267382000 | 7.019378000  |
| H  | 17.483359000 | 3.501276000  | -0.328360000 |
| H  | 3.380445000  | 3.506695000  | 0.632080000  |

|   |              |             |             |
|---|--------------|-------------|-------------|
| H | 3.465497000  | 9.932619000 | 7.011577000 |
| C | 9.510743000  | 6.659893000 | 4.027300000 |
| C | 10.645885000 | 7.471978000 | 4.180889000 |
| C | 12.011658000 | 6.837141000 | 4.300151000 |
| H | 12.600824000 | 7.405880000 | 5.034233000 |
| H | 9.492188000  | 5.657419000 | 4.469656000 |
| H | 11.921820000 | 5.801874000 | 4.673499000 |
| H | 12.223112000 | 6.356183000 | 2.423003000 |
| H | 8.427399000  | 8.204404000 | 3.897126000 |
| H | 9.993218000  | 6.433555000 | 2.785607000 |
| O | 12.728060000 | 6.877396000 | 3.078835000 |
| O | 10.549310000 | 8.719891000 | 3.959518000 |
| O | 8.275314000  | 7.242605000 | 3.923475000 |

## Hf-UIO-66 Prod

|   |              |              |              |
|---|--------------|--------------|--------------|
| C | 10.500300000 | 13.573400000 | 3.164300000  |
| C | 13.590800000 | 10.499200000 | 3.218800000  |
| C | 7.259400000  | 10.315400000 | 3.225500000  |
| C | 13.586700000 | 13.569300000 | 0.091800000  |
| C | 7.226100000  | 7.224700000  | 0.091400000  |
| C | 10.347300000 | 13.576500000 | -3.149300000 |
| C | 10.494300000 | 7.256200000  | -3.139800000 |
| C | 13.586900000 | 10.339500000 | -3.142400000 |
| C | 7.268500000  | 10.493900000 | -3.141500000 |
| C | 7.267300000  | 13.569000000 | -0.062000000 |
| C | 13.640800000 | 7.253200000  | -0.115400000 |
| H | 6.481786000  | 14.352567000 | -0.129116000 |
| H | 14.372643000 | 14.353788000 | 0.144523000  |
| H | 10.565672000 | 14.362954000 | 3.944304000  |
| H | 10.295774000 | 14.358546000 | -3.937204000 |
| H | 10.554950000 | 6.481373000  | -3.934928000 |
| H | 14.370072000 | 10.288774000 | -3.929542000 |
| H | 6.485476000  | 10.562827000 | -3.927408000 |
| C | 6.543944000  | 10.365750000 | 5.630731000  |
| C | 14.283806000 | 10.511712000 | 5.627581000  |
| C | 5.551083000  | 10.309998000 | 6.604383000  |
| C | 15.266250000 | 10.469218000 | 6.612663000  |
| C | 5.450406000  | 3.882377000  | 0.204044000  |
| C | 6.459168000  | 4.837594000  | 0.102082000  |
| C | 16.974056000 | 10.336938000 | 4.905218000  |
| C | 3.869195000  | 10.096365000 | 4.879149000  |
| C | 4.802303000  | 6.597125000  | 0.254023000  |
| C | 15.993659000 | 10.379991000 | 3.918230000  |
| C | 4.859179000  | 10.151055000 | 3.904549000  |
| C | 3.796949000  | 5.640317000  | 0.357368000  |
| C | 6.204361000  | 10.280011000 | 4.273767000  |

|    |              |              |              |
|----|--------------|--------------|--------------|
| C  | 14.641672000 | 10.466438000 | 4.273665000  |
| C  | 4.213717000  | 10.172557000 | 6.229309000  |
| C  | 16.612039000 | 10.381223000 | 6.252412000  |
| C  | 4.120189000  | 4.282088000  | 0.340086000  |
| C  | 6.141554000  | 6.201204000  | 0.137718000  |
| H  | 7.592659000  | 10.481299000 | 5.911973000  |
| H  | 13.226090000 | 10.587389000 | 5.888431000  |
| H  | 5.819426000  | 10.379049000 | 7.660904000  |
| H  | 14.984290000 | 10.508534000 | 7.667398000  |
| H  | 5.701487000  | 2.819159000  | 0.178405000  |
| H  | 7.506451000  | 4.545392000  | 0.001048000  |
| H  | 18.027353000 | 10.268132000 | 4.624352000  |
| H  | 2.822458000  | 9.987320000  | 4.587510000  |
| H  | 4.571472000  | 7.663927000  | 0.277642000  |
| H  | 16.255617000 | 10.345189000 | 2.859233000  |
| H  | 4.611418000  | 10.081739000 | 2.843793000  |
| H  | 2.754982000  | 5.952611000  | 0.456378000  |
| H  | 8.441285000  | 12.368398000 | 2.002243000  |
| O  | 8.472356000  | 10.275660000 | 3.613108000  |
| O  | 12.385694000 | 10.536061000 | 3.600064000  |
| O  | 10.444603000 | 12.391759000 | 3.585119000  |
| O  | 10.480735000 | 13.977530000 | 1.977385000  |
| O  | 8.414433000  | 6.811787000  | 0.049691000  |
| O  | 12.400545000 | 13.984080000 | 0.057276000  |
| O  | 6.861379000  | 8.439893000  | 0.098126000  |
| O  | 13.992381000 | 12.382255000 | 0.068352000  |
| O  | 13.970628000 | 10.471346000 | 2.013295000  |
| O  | 6.882165000  | 10.376526000 | 2.023517000  |
| O  | 9.007963000  | 11.822524000 | 1.446780000  |
| O  | 11.812118000 | 8.955789000  | 1.484589000  |
| O  | 9.371064000  | 9.334257000  | 1.103592000  |
| O  | 11.470240000 | 11.464313000 | 1.062361000  |
| Hf | 10.428054000 | 12.934191000 | 0.004222000  |
| Hf | 10.423988000 | 7.832418000  | 0.047563000  |
| Hf | 10.448831000 | 10.427298000 | 2.509246000  |
| Hf | 12.947922000 | 10.379450000 | 0.034365000  |
| Hf | 7.917955000  | 10.389156000 | 0.035301000  |
| H  | 15.073712000 | 2.828117000  | -0.336122000 |
| H  | 13.298837000 | 4.590138000  | -0.234525000 |
| H  | 16.311599000 | 7.643324000  | -0.139337000 |
| H  | 18.099944000 | 5.896288000  | -0.245494000 |
| H  | 8.440766000  | 8.434654000  | -1.934830000 |
| H  | 12.404955000 | 12.380635000 | -1.954978000 |
| C  | 15.348803000 | 3.884504000  | -0.293918000 |
| C  | 14.356979000 | 4.859168000  | -0.237620000 |
| C  | 16.056877000 | 6.582859000  | -0.183812000 |

|    |              |              |              |
|----|--------------|--------------|--------------|
| C  | 17.046781000 | 5.606036000  | -0.242547000 |
| C  | 16.694123000 | 4.256657000  | -0.297165000 |
| C  | 14.705669000 | 6.214717000  | -0.182299000 |
| O  | 8.455925000  | 10.457020000 | -3.545325000 |
| O  | 12.399137000 | 10.366102000 | -3.549559000 |
| O  | 10.476969000 | 8.446632000  | -3.539878000 |
| O  | 10.375956000 | 12.387561000 | -3.547751000 |
| O  | 10.375164000 | 13.991435000 | -1.962495000 |
| O  | 10.442321000 | 6.831219000  | -1.961779000 |
| O  | 8.453344000  | 13.981219000 | -0.030622000 |
| O  | 12.445463000 | 6.870275000  | -0.152338000 |
| O  | 14.016613000 | 8.464364000  | -0.014701000 |
| O  | 6.860423000  | 12.381709000 | -0.017982000 |
| O  | 13.998393000 | 10.370292000 | -1.956579000 |
| O  | 6.856778000  | 10.454516000 | -1.953802000 |
| O  | 11.844923000 | 11.830895000 | -1.396752000 |
| O  | 9.004605000  | 8.983795000  | -1.379735000 |
| O  | 11.471867000 | 9.369712000  | -1.005174000 |
| O  | 9.377237000  | 11.452546000 | -1.014128000 |
| H  | 12.338749000 | 8.391988000  | 2.084391000  |
| Hf | 10.434468000 | 10.399378000 | -2.478768000 |
| O  | 10.491407000 | 6.524537000  | 1.685715000  |
| H  | 9.825877000  | 5.831166000  | 1.784843000  |
| H  | 17.382971000 | 10.348477000 | 7.026108000  |
| H  | 17.472247000 | 3.490680000  | -0.342369000 |
| H  | 3.331135000  | 3.531643000  | 0.427714000  |
| H  | 3.435167000  | 10.127062000 | 6.994602000  |
| C  | 9.533346000  | 6.888759000  | 5.089078000  |
| C  | 10.683699000 | 7.489521000  | 4.357588000  |
| C  | 11.960975000 | 6.698709000  | 4.258753000  |
| H  | 12.594327000 | 7.067309000  | 5.089095000  |
| H  | 9.886860000  | 6.418189000  | 6.024702000  |
| H  | 11.734893000 | 5.641346000  | 4.503241000  |
| H  | 11.984004000 | 6.511875000  | 2.383246000  |
| H  | 8.648104000  | 8.583663000  | 4.792939000  |
| H  | 9.222826000  | 6.044739000  | 4.430259000  |
| O  | 12.643543000 | 6.838265000  | 3.064772000  |
| O  | 10.544279000 | 8.615966000  | 3.897472000  |
| O  | 8.499466000  | 7.782639000  | 5.337827000  |
| C  | 7.468599000  | 4.116563000  | 3.090359000  |
| C  | 6.717684000  | 4.906737000  | 4.120404000  |
| C  | 6.382829000  | 6.318439000  | 3.628513000  |
| H  | 6.933603000  | 3.214258000  | 2.696251000  |
| H  | 6.486096000  | 7.381590000  | 5.216205000  |
| H  | 5.658983000  | 6.233114000  | 2.802924000  |
| H  | 7.288903000  | 6.816555000  | 3.231201000  |

|   |             |             |             |
|---|-------------|-------------|-------------|
| H | 5.010203000 | 4.877601000 | 4.955129000 |
| H | 7.413217000 | 5.019603000 | 4.984108000 |
| O | 8.575058000 | 4.424236000 | 2.707719000 |
| O | 5.768217000 | 7.033660000 | 4.660971000 |
| O | 5.555149000 | 4.227037000 | 4.489707000 |
